# Supplementary material for: Aging and serum MCP-1 are associated with gut microbiome composition in a murine model
Source: PeerJ. 2016 Mar 31;4:e1854. doi: 10.7717/peerj.1854 (PMC4824877; doi:10.7717/peerj.1854)
Supplement: Table S1 [file peerj-04-1854-s001.xlsx]

## Sheet: Legend
Additional file 1. Proportion of sequences assigned to each sample at each taxonomic rank, along with means for each age group and significance of difference in means using Wilcoxon Rank Sum Test with q-value FDR multiple test correction. Taxa with p < 0.05 and q < 0.15 are hightlighted in green.

## Sheet: Phylum
Kingdom	Phylum	p-value	p-values (corrected)	Young: mean rel. freq. (%)	Aged: mean rel. freq. (%)
Bacteria	Deferribacteres	0.00793651	0.0555556	1.57946e-05	0.00586127
Bacteria	Bacteroidetes	0.015873	0.111111	0.480695	0.559342
Bacteria	Firmicutes	0.0555556	0.388889	0.287346	0.20453
Bacteria	Tenericutes	0.150794	1	2.10377e-05	7.48841e-05
Bacteria	Actinobacteria	1	1	0.000598353	0.000531292
Bacteria	Proteobacteria	1	1	0.000127906	0.000129978
Bacteria	Verrucomicrobia	1	1	0.230125	0.228321

## Sheet: Class
Kingdom	Phylum	Class	p-values	p-values (corrected)	Young: mean rel. freq. (%)	Aged: mean rel. freq. (%)
Bacteria	Deferribacteres	Deferribacteres	0.00793651	0.0952381	1.57946e-05	0.00586127
Bacteria	Bacteroidetes	Bacteroidia	0.015873	0.190476	0.480695	0.559342
Bacteria	Tenericutes	Mollicutes	0.150794	1	2.10377e-05	7.48841e-05
Bacteria	Firmicutes	Clostridia	0.222222	1	0.272432	0.195809
Bacteria	Proteobacteria	Betaproteobacteria	0.239317	1	4.62338e-07	3.48534e-06
Bacteria	Actinobacteria	Actinobacteria	0.672336	1	7.67653e-06	5.23275e-06
Bacteria	Firmicutes	Bacilli	0.690476	1	0.0119563	0.00617844
Bacteria	Actinobacteria	Coriobacteriia	1	1	0.000590676	0.000526059
Bacteria	Firmicutes	Erysipelotrichi	1	1	0.00295781	0.00254107
Bacteria	Proteobacteria	Alphaproteobacteria	1	1	5.69387e-07	9.21092e-07
Bacteria	Proteobacteria	Gammaproteobacteria	1	1	0.00012585	0.000125571
Bacteria	Verrucomicrobia	Verrucomicrobiae	1	1	0.230125	0.228321

## Sheet: Order
Kingdom	Phylum	Class	Order	p-values	p-values (corrected)	Young: mean rel. freq. (%)	Aged: mean rel. freq. (%)
Bacteria	Deferribacteres	Deferribacteres	Deferribacterales	0.00793651	0.142857	1.57946e-05	0.00586127
Bacteria	Protebacteria	Gammaproteobacteria	Enterobacteriales	0.00793651	0.142857	1.3441e-05	5.05181e-05
Bacteria	Bacteroidetes	Bacteroidia	Bacteroidales	0.015873	0.285714	0.480695	0.559342
Bacteria	Protebacteria	Betaproteobacteria	Burkholderiales	0.0720057	1	0	3.48534e-06
Bacteria	Tenericutes	Mollicutes	RF39	0.0952381	1	1.93886e-05	7.16368e-05
Bacteria	Actinobacteria	Actinobacteria	Actinomycetales	0.179712	1	1.59948e-06	0
Bacteria	Firmicutes	Bacilli	Turicibacterales	0.222222	1	0.0009686	0.00165632
Bacteria	Firmicutes	Clostridia	Clostridiales	0.222222	1	0.272432	0.195783
Bacteria	Firmicutes	Bacilli	Lactobacillales	0.420635	1	0.0109827	0.00451864
Bacteria	Protebacteria	Gammaproteobacteria	Oceanospirillales	0.547619	1	9.87647e-05	6.37423e-05
Bacteria	Tenericutes	Mollicutes	Anaeroplasmatales	0.655836	1	1.64913e-06	3.24734e-06
Bacteria	Protebacteria	Gammaproteobacteria	Pseudomonadales	0.84127	1	1.20446e-05	1.08556e-05
Bacteria	Actinobacteria	Actinobacteria	Bifidobacteriales	1	1	6.07705e-06	5.23275e-06
Bacteria	Actinobacteria	Coriobacteria	Coriobacteriales	1	1	0.000590676	0.000526059
Bacteria	Firmicutes	Bacilli	Bacillales	1	1	5.0158e-06	3.48219e-06
Bacteria	Firmicutes	Erysipelotrichi	Erysipelotrichales	1	1	0.00295781	0.00254107
Bacteria	Protebacteria	Gammaproteobacteria	Xanthomonadales	1	1	1.13877e-06	4.55136e-07
Bacteria	Verrucomicrobia	Verrucomicrobiae	Verrucomicrobiales	1	1	0.230125	0.228321

## Sheet: Family
Kingdom	Phylum	Class	Order	Family	p-values	p-values (corrected)	Young: mean rel. freq. (%)	Aged: mean rel. freq. (%)
Bacteria	Firmicutes	Clostridia	Clostridiales	Christensenellaceae	0.00749496	0.0444444	0	4.0297e-05
Bacteria	Firmicutes	Clostridia	Clostridiales	Clostridiaceae	0.00793651	0.0444444	0.000861005	0.0282879
Bacteria	Firmicutes	Clostridia	Clostridiales	Ruminococcaceae	0.00793651	0.0444444	0.124172	0.0559463
Bacteria	Proteobacteria	Gammaproteobacteria	Enterobacteriales	Enterobacteriaceae	0.00793651	0.0444444	1.3441e-05	5.05181e-05
Bacteria	Deferribacteres	Deferribacteres	Deferribacterales	Deferribacteraceae	0.00793651	0.0444444	1.57946e-05	0.00586127
Bacteria	Bacteroidetes	Bacteroidia	Bacteroidales	S24-7	0.0555556	0.259259	0.0796214	0.149989
Bacteria	Proteobacteria	Betaproteobacteria	Burkholderiales	Oxalobacteraceae	0.0720057	0.288023	0	1.46521e-06
Bacteria	Firmicutes	Bacilli	Lactobacillales	Enterococcaceae	0.161238	0.518519	2.16112e-06	1.35387e-05
Bacteria	Proteobacteria	Betaproteobacteria	Burkholderiales	Comamonadaceae	0.179712	0.518519	0	2.02014e-06
Bacteria	Firmicutes	Bacilli	Turicibacterales	Turicibacteraceae	0.222222	0.518519	0.0009686	0.00165632
Bacteria	Firmicutes	Clostridia	Clostridiales	Lachnospiraceae	0.222222	0.518519	0.0267528	0.0217495
Bacteria	Firmicutes	Clostridia	Clostridiales	Peptostreptococcaceae	0.222222	0.518519	0.00269586	0.00176983
Bacteria	Firmicutes	Clostridia	Clostridiales	Dehalobacteriaceae	0.420635	0.84127	0.00235638	0.00193083
Bacteria	Firmicutes	Bacilli	Lactobacillales	Lactobacillaceae	0.420635	0.84127	0.0109735	0.0044949
Bacteria	Firmicutes	Bacilli	Lactobacillales	Streptococcaceae	0.463344	0.864909	7.10769e-06	1.01978e-05
Bacteria	Proteobacteria	Gammaproteobacteria	Oceanospirillales	Halomonadaceae	0.547619	0.901961	9.87647e-05	6.37423e-05
Bacteria	Bacteroidetes	Bacteroidia	Bacteroidales	Porphyromonadaceae	0.547619	0.901961	0.401074	0.409353
Bacteria	Tenericutes	Mollicutes	Anaeroplasmatales	Anaeroplasmataceae	0.655836	1	1.64913e-06	3.24734e-06
Bacteria	Firmicutes	Clostridia	Clostridiales	[Mogibacteriaceae]	0.690476	1	0.000870223	0.000780609
Bacteria	Proteobacteria	Gammaproteobacteria	Pseudomonadales	Moraxellaceae	0.79717	1	1.84555e-06	1.55418e-06
Bacteria	Proteobacteria	Gammaproteobacteria	Pseudomonadales	Pseudomonadaceae	0.84127	1	1.01991e-05	9.30145e-06
Bacteria	Actinobacteria	Actinobacteria	Bifidobacteriales	Bifidobacteriaceae	1	1	6.07705e-06	5.23275e-06
Bacteria	Firmicutes	Erysipelotrichi	Erysipelotrichales	Erysipelotrichaceae	1	1	0.00295781	0.00254107
Bacteria	Actinobacteria	Coriobacteriia	Coriobacteriales	Coriobacteriaceae	1	1	0.000590676	0.000526059
Bacteria	Proteobacteria	Gammaproteobacteria	Xanthomonadales	Xanthomonadaceae	1	1	1.13877e-06	4.55136e-07
Bacteria	Verrucomicrobia	Verrucomicrobiae	Verrucomicrobiales	Verrucomicrobiaceae	1	1	0.230125	0.228321
Bacteria	Firmicutes	Bacilli	Bacillales	Bacillaceae	1	1	5.68571e-07	4.55136e-07
Bacteria	Firmicutes	Bacilli	Bacillales	Staphylococcaceae	1	1	4.44723e-06	3.02706e-06

## Sheet: Genus
Kingdom	Phylum	Class	Order	Family	Genus	p-values	p-values (corrected)	Young: mean rel. freq. (%)	Aged: mean rel. freq. (%)
Bacteria	Firmicutes	Clostridia	Clostridiales	Clostridiaceae	02d06	0.00749496	0.0408163	0	2.18295e-05
Bacteria	Firmicutes	Clostridia	Clostridiales	Clostridiaceae	Sarcina	0.00749496	0.0408163	0	0.000116047
Bacteria	Actinobacteria	Coriobacteriia	Coriobacteriales	Coriobacteriaceae	Eggerthella	0.00749496	0.0408163	0	1.30703e-05
Bacteria	Firmicutes	Clostridia	Clostridiales	Lachnospiraceae	Blautia	0.00793651	0.0408163	0.000362485	2.17362e-05
Bacteria	Firmicutes	Clostridia	Clostridiales	Ruminococcaceae	Anaerotruncus	0.00793651	0.0408163	4.42361e-05	0.000719819
Bacteria	Firmicutes	Clostridia	Clostridiales	Ruminococcaceae	Oscillospira	0.00793651	0.0408163	0.0542315	0.0186487
Bacteria	Deferribacteres	Deferribacteres	Deferribacterales	Deferribacteraceae	Mucispirillum	0.00793651	0.0408163	1.57946e-05	0.00586127
Bacteria	Firmicutes	Clostridia	Clostridiales	Clostridiaceae	Clostridium	0.0111594	0.0502174	1.03091e-06	0.00021503
Bacteria	Firmicutes	Erysipelotrichi	Erysipelotrichales	Erysipelotrichaceae	Clostridium	0.015873	0.0634921	3.81752e-05	1.57055e-05
Bacteria	Firmicutes	Erysipelotrichi	Erysipelotrichales	Erysipelotrichaceae	[Eubacterium]	0.031746	0.114286	4.16703e-06	5.87013e-05
Bacteria	Firmicutes	Clostridia	Clostridiales	Ruminococcaceae	Ruminococcus	0.0555556	0.181818	0.00888679	0.00566193
Bacteria	Firmicutes	Clostridia	Clostridiales	[Mogibacteriaceae]	Anaerovorax	0.0720057	0.216017	0	1.97631e-06
Bacteria	Proteobacteria	Gammaproteobacteria	Enterobacteriales	Enterobacteriaceae	Pantoea	0.0952381	0.263736	3.60268e-06	2.688e-05
Bacteria	Firmicutes	Bacilli	Lactobacillales	Enterococcaceae	Enterococcus	0.161238	0.414611	1.59254e-06	9.95675e-06
Bacteria	Firmicutes	Erysipelotrichi	Erysipelotrichales	Erysipelotrichaceae	Coprobacillus	0.173217	0.415721	7.63617e-05	0.000525705
Bacteria	Firmicutes	Bacilli	Turicibacterales	Turicibacteraceae	Turicibacter	0.222222	0.5	0.0009686	0.00165632
Bacteria	Firmicutes	Clostridia	Clostridiales	Clostridiaceae	SMB53	0.420635	0.757143	5.68424e-05	4.15382e-05
Bacteria	Firmicutes	Clostridia	Clostridiales	Dehalobacteriaceae	Dehalobacterium	0.420635	0.757143	0.00235638	0.00193083
Bacteria	Firmicutes	Clostridia	Clostridiales	Lachnospiraceae	[Ruminococcus]	0.420635	0.757143	0.00305775	0.00469997
Bacteria	Firmicutes	Bacilli	Lactobacillales	Lactobacillaceae	Lactobacillus	0.420635	0.757143	0.0109735	0.0044949
Bacteria	Firmicutes	Bacilli	Lactobacillales	Streptococcaceae	Lactococcus	0.480177	0.821429	1.70816e-06	4.08815e-06
Bacteria	Firmicutes	Clostridia	Clostridiales	Lachnospiraceae	Dorea	0.547619	0.821429	9.22487e-05	8.32607e-05
Bacteria	Proteobacteria	Gammaproteobacteria	Oceanospirillales	Halomonadaceae	Halomonas	0.547619	0.821429	9.87647e-05	6.37423e-05
Bacteria	Bacteroidetes	Bacteroidia	Bacteroidales	Porphyromonadaceae	Parabacteroides	0.547619	0.821429	0.401074	0.409353
Bacteria	Tenericutes	Mollicutes	Anaeroplasmatales	Anaeroplasmataceae	Anaeroplasma	0.655836	0.944405	1.64913e-06	3.24734e-06
Bacteria	Firmicutes	Clostridia	Clostridiales	Lachnospiraceae	Coprococcus	0.690476	0.956044	0.00259781	0.00272509
Bacteria	Proteobacteria	Gammaproteobacteria	Pseudomonadales	Moraxellaceae	Acinetobacter	0.79717	1	1.84555e-06	1.55418e-06
Bacteria	Firmicutes	Bacilli	Lactobacillales	Streptococcaceae	Streptococcus	0.823664	1	2.52226e-06	2.15427e-06
Bacteria	Proteobacteria	Gammaproteobacteria	Pseudomonadales	Pseudomonadaceae	Pseudomonas	0.84127	1	1.01991e-05	9.30145e-06
Bacteria	Actinobacteria	Actinobacteria	Bifidobacteriales	Bifidobacteriaceae	Bifidobacterium	1	1	6.07705e-06	5.23275e-06
Bacteria	Firmicutes	Clostridia	Clostridiales	Lachnospiraceae	Butyrivibrio	1	1	5.68571e-07	4.60546e-07
Bacteria	Actinobacteria	Coriobacteriia	Coriobacteriales	Coriobacteriaceae	Adlercreutzia	1	1	0.000590676	0.000511023
Bacteria	Proteobacteria	Gammaproteobacteria	Xanthomonadales	Xanthomonadaceae	Stenotrophomonas	1	1	1.13877e-06	4.55136e-07
Bacteria	Verrucomicrobia	Verrucomicrobiae	Verrucomicrobiales	Verrucomicrobiaceae	Akkermansia	1	1	0.230125	0.228321
Bacteria	Firmicutes	Bacilli	Bacillales	Bacillaceae	Bacillus	1	1	5.68571e-07	4.55136e-07
Bacteria	Firmicutes	Bacilli	Bacillales	Staphylococcaceae	Staphylococcus	1	1	4.44723e-06	3.02706e-06

## Sheet: OTU_updated
OTU_identifier	taxonomy	p_values	p_values_corrected	41	42	43	44	45	51	52	53	54	55	Young median abundance	Aged median abundance	Median fold change	Inf= occurences where one group had no detectable taxa
1024529	k__Bacteria; p__Firmicutes; c__Clostridia; o__Clostridiales; f__Clostridiaceae; g__; s__	0.00793651	0.146935	64	32	122	39	105	0	0	0	1	0	0	64	Inf
1108378	k__Bacteria; p__Firmicutes; c__Clostridia; o__Clostridiales; f__; g__; s__	0.00793651	0.146935	16	22	41	71	26	88	89	75	87	123	88	26	0.295455
1108453	k__Bacteria; p__Firmicutes; c__Clostridia; o__Clostridiales; f__; g__; s__	0.00793651	0.146935	193	30	17	6	34	325	277	958	265	299	299	30	0.100334
1109539	k__Bacteria; p__Firmicutes; c__Clostridia; o__Clostridiales; f__Lachnospiraceae; g__; s__	0.00793651	0.146935	939	656	233	138	5	0	2	2	0	0	0	233	Inf
1136443	k__Bacteria; p__Deferribacteres; c__Deferribacteres; o__Deferribacterales; f__Deferribacteraceae; g__Mucispirillum; s__schaedleri	0.00793651	0.146935	10200	436	147	284	254	6	4	6	7	8	6	284	47.3333
129394	k__Bacteria; p__Firmicutes; c__Clostridia; o__Clostridiales; f__; g__; s__	0.00793651	0.146935	55	47	12	66	27	510	319	915	386	367	386	47	0.121762
136783	k__Bacteria; p__Firmicutes; c__Clostridia; o__Clostridiales; f__; g__; s__	0.00793651	0.146935	2	3	1	11	1	0	0	0	0	0	0	2	Inf
153291	k__Bacteria; p__Firmicutes; c__Clostridia; o__Clostridiales; f__; g__; s__	0.00793651	0.146935	105	66	336	25	86	0	0	0	0	0	0	86	Inf
157840	k__Bacteria; p__Firmicutes; c__Clostridia; o__Clostridiales; f__; g__; s__	0.00793651	0.146935	23	46	54	203	27	0	0	0	0	1	0	46	Inf
164242	k__Bacteria; p__Firmicutes; c__Clostridia; o__Clostridiales; f__Ruminococcaceae; g__; s__	0.00793651	0.146935	0	0	0	0	0	5	2	2	1	9	2	0	Inf
168145	k__Bacteria; p__Firmicutes; c__Clostridia; o__Clostridiales; f__Ruminococcaceae; g__; s__	0.00793651	0.146935	0	0	0	0	0	7	14	17	24	9	14	0	Inf
173722	k__Bacteria; p__Firmicutes; c__Clostridia; o__Clostridiales; f__Lachnospiraceae; g__[Ruminococcus]; s__gnavus	0.00793651	0.146935	47	40	78	78	29	1	3	1	5	1	1	47	47
174260	k__Bacteria; p__Firmicutes; c__Clostridia; o__Clostridiales; f__; g__; s__	0.00793651	0.146935	27	77	38	7	5	0	1	1	0	0	0	27	Inf
174770	k__Bacteria; p__Firmicutes; c__Clostridia; o__Clostridiales; f__; g__; s__	0.00793651	0.146935	1	2	2	0	2	13	5	15	9	14	13	2	0.153846
174960	k__Bacteria; p__Firmicutes; c__Clostridia; o__Clostridiales; f__Clostridiaceae; g__; s__	0.00793651	0.146935	111	84	198	51	146	0	0	0	1	1	0	111	Inf
175416	k__Bacteria; p__Firmicutes; c__Clostridia; o__Clostridiales; f__; g__; s__	0.00793651	0.146935	15	26	8	5	4	1	0	0	0	0	0	8	Inf
175922	k__Bacteria; p__Firmicutes; c__Clostridia; o__Clostridiales; f__Ruminococcaceae; g__Oscillospira; s__	0.00793651	0.146935	36	38	12	10	72	0	0	0	1	2	0	36	Inf
177068	k__Bacteria; p__Firmicutes; c__Clostridia; o__Clostridiales; f__; g__; s__	0.00793651	0.146935	10	15	3	9	5	42	27	53	16	29	29	9	0.310345
179547	k__Bacteria; p__Firmicutes; c__Clostridia; o__Clostridiales; f__Ruminococcaceae; g__Oscillospira; s__	0.00793651	0.146935	353	650	326	446	538	2451	1052	2939	1284	2184	2184	446	0.204212
179657	k__Bacteria; p__Firmicutes; c__Clostridia; o__Clostridiales; f__Lachnospiraceae; g__; s__	0.00793651	0.146935	5	7	16	10	34	0	0	0	0	0	0	10	Inf
181174	k__Bacteria; p__Firmicutes; c__Clostridia; o__Clostridiales; f__Ruminococcaceae; g__; s__	0.00793651	0.146935	6	27	27	16	32	0	0	0	0	0	0	27	Inf
181348	k__Bacteria; p__Firmicutes; c__Clostridia; o__Clostridiales; f__Lachnospiraceae; g__Coprococcus; s__	0.00793651	0.146935	47	84	37	161	49	0	0	0	0	0	0	49	Inf
182033	k__Bacteria; p__Firmicutes; c__Clostridia; o__Clostridiales; f__Ruminococcaceae; g__Oscillospira; s__	0.00793651	0.146935	9	11	1	6	5	43	30	63	25	30	30	6	0.2
182470	k__Bacteria; p__Firmicutes; c__Clostridia; o__Clostridiales; f__; g__; s__	0.00793651	0.146935	11	37	14	6	11	2	0	0	0	1	0	11	Inf
182643	k__Bacteria; p__Firmicutes; c__Clostridia; o__Clostridiales; f__Clostridiaceae; g__; s__	0.00793651	0.146935	57	41	85	29	51	0	1	0	0	0	0	51	Inf
182861	k__Bacteria; p__Firmicutes; c__Clostridia; o__; f__; g__; s__	0.00793651	0.146935	10	9	23	2	9	0	0	0	0	0	0	9	Inf
183174	k__Bacteria; p__Firmicutes; c__Clostridia; o__Clostridiales; f__Lachnospiraceae; g__[Ruminococcus]; s__gnavus	0.00793651	0.146935	107	70	173	264	64	3	14	2	19	0	3	107	35.6667
184966	k__Bacteria; p__Firmicutes; c__Clostridia; o__Clostridiales; f__; g__; s__	0.00793651	0.146935	42	196	17	17	2	2511	2313	1560	1217	621	1560	17	0.0108974
186886	k__Bacteria; p__Firmicutes; c__Clostridia; o__Clostridiales; f__Ruminococcaceae; g__; s__	0.00793651	0.146935	54	196	56	72	58	7	29	2	1	0	2	58	29
187000	k__Bacteria; p__Firmicutes; c__Clostridia; o__Clostridiales; f__Ruminococcaceae; g__; s__	0.00793651	0.146935	1	1	1	1	1	0	0	0	0	0	0	1	Inf
1885089	k__Bacteria; p__Firmicutes; c__Clostridia; o__Clostridiales; f__Ruminococcaceae; g__; s__	0.00793651	0.146935	2	6	5	9	5	0	0	0	0	0	0	5	Inf
188973	k__Bacteria; p__Firmicutes; c__Clostridia; o__Clostridiales; f__Lachnospiraceae; g__Coprococcus; s__	0.00793651	0.146935	0	0	0	0	0	65	45	90	148	67	67	0	Inf
190254	k__Bacteria; p__Firmicutes; c__Clostridia; o__Clostridiales; f__Lachnospiraceae; g__[Ruminococcus]; s__gnavus	0.00793651	0.146935	0	0	0	0	0	1	1	4	2	5	2	0	Inf
191098	k__Bacteria; p__Firmicutes; c__Clostridia; o__Clostridiales; f__Lachnospiraceae; g__; s__	0.00793651	0.146935	9	6	6	10	18	0	0	0	0	0	0	9	Inf
191274	k__Bacteria; p__Firmicutes; c__Clostridia; o__Clostridiales; f__Lachnospiraceae; g__; s__	0.00793651	0.146935	2	7	2	2	3	303	211	379	215	509	303	2	0.00660066
191616	k__Bacteria; p__Firmicutes; c__Clostridia; o__Clostridiales; f__Ruminococcaceae; g__; s__	0.00793651	0.146935	26	29	32	41	17	0	0	0	0	8	0	29	Inf
191816	k__Bacteria; p__Firmicutes; c__Clostridia; o__Clostridiales; f__Ruminococcaceae; g__Oscillospira; s__	0.00793651	0.146935	35	6	6	35	16	126	259	360	154	98	154	16	0.103896
192598	k__Bacteria; p__Firmicutes; c__Clostridia; o__Clostridiales; f__Ruminococcaceae; g__Ruminococcus; s__	0.00793651	0.146935	66	196	47	93	77	779	929	1698	1342	924	929	77	0.0828848
193620	k__Bacteria; p__Firmicutes; c__Clostridia; o__Clostridiales; f__; g__; s__	0.00793651	0.146935	614	177	45	17	38	6	9	7	6	4	6	45	7.5
195691	k__Bacteria; p__Firmicutes; c__Clostridia; o__Clostridiales; f__Lachnospiraceae; g__; s__	0.00793651	0.146935	2	0	0	0	0	5	5	17	13	7	7	0	Inf
196191	k__Bacteria; p__Firmicutes; c__Clostridia; o__Clostridiales; f__Ruminococcaceae; g__Oscillospira; s__	0.00793651	0.146935	12	21	1	11	8	48	23	78	39	49	48	11	0.229167
196391	k__Bacteria; p__Firmicutes; c__Clostridia; o__Clostridiales; f__Clostridiaceae; g__02d06; s__	0.00793651	0.146935	8	3	16	6	11	0	0	0	0	0	0	8	Inf
196753	k__Bacteria; p__Firmicutes; c__Clostridia; o__Clostridiales; f__Clostridiaceae; g__; s__	0.00793651	0.146935	3	1	3	3	2	0	0	0	0	0	0	3	Inf
197099	k__Bacteria; p__Firmicutes; c__Clostridia; o__Clostridiales; f__Ruminococcaceae; g__Oscillospira; s__	0.00793651	0.146935	16	24	4	10	3	57	34	145	57	40	57	10	0.175439
197463	k__Bacteria; p__Firmicutes; c__Clostridia; o__Clostridiales; f__Ruminococcaceae; g__Oscillospira; s__	0.00793651	0.146935	9	4	3	7	7	27	19	32	11	34	27	7	0.259259
197600	k__Bacteria; p__Firmicutes; c__Clostridia; o__Clostridiales; f__Lachnospiraceae; g__; s__	0.00793651	0.146935	515	467	194	269	551	1	0	0	0	0	0	467	Inf
197706	k__Bacteria; p__Firmicutes; c__Clostridia; o__Clostridiales; f__; g__; s__	0.00793651	0.146935	959	174	3011	342	366	3636	3058	9801	3130	5910	3636	366	0.10066
197782	k__Bacteria; p__Firmicutes; c__Clostridia; o__Clostridiales; f__Ruminococcaceae; g__; s__	0.00793651	0.146935	2	0	0	1	0	3	4	14	6	5	5	0	Inf
198998	k__Bacteria; p__Firmicutes; c__Clostridia; o__Clostridiales; f__; g__; s__	0.00793651	0.146935	0	0	0	0	0	6	12	31	2	6	6	0	Inf
214835	k__Bacteria; p__Firmicutes; c__Clostridia; o__Clostridiales; f__Lachnospiraceae; g__; s__	0.00793651	0.146935	0	8	15	4	13	116	58	309	79	32	79	8	0.101266
230421	k__Bacteria; p__Firmicutes; c__Clostridia; o__Clostridiales; f__Ruminococcaceae; g__; s__	0.00793651	0.146935	8	7	41	21	22	0	0	0	0	0	0	21	Inf
231169	k__Bacteria; p__Firmicutes; c__Clostridia; o__Clostridiales; f__Lachnospiraceae; g__; s__	0.00793651	0.146935	13	13	7	7	8	0	0	0	0	0	0	8	Inf
233817	k__Bacteria; p__Firmicutes; c__Clostridia; o__Clostridiales; f__; g__; s__	0.00793651	0.146935	18306	4099	1817	1312	1541	196	50	5	4	144	50	1817	36.34
235424	k__Bacteria; p__Firmicutes; c__Clostridia; o__Clostridiales; f__Clostridiaceae; g__Clostridium; s__	0.00793651	0.146935	1	2	4	1	2	0	0	0	0	0	0	2	Inf
258099	k__Bacteria; p__Firmicutes; c__Clostridia; o__Clostridiales; f__Ruminococcaceae; g__; s__	0.00793651	0.146935	46	99	105	108	253	0	0	0	0	0	0	105	Inf
258232	k__Bacteria; p__Firmicutes; c__Clostridia; o__Clostridiales; f__; g__; s__	0.00793651	0.146935	1	24	0	0	1	70	60	58	51	33	58	1	0.0172414
259087	k__Bacteria; p__Firmicutes; c__Clostridia; o__Clostridiales; f__Lachnospiraceae; g__[Ruminococcus]; s__gnavus	0.00793651	0.146935	0	0	0	0	0	17	15	28	34	39	28	0	Inf
259556	k__Bacteria; p__Firmicutes; c__Clostridia; o__Clostridiales; f__; g__; s__	0.00793651	0.146935	146	770	685	299	512	1112	940	1684	871	1044	1044	512	0.490421
259631	k__Bacteria; p__Firmicutes; c__Clostridia; o__Clostridiales; f__; g__; s__	0.00793651	0.146935	0	0	0	1	1	114	353	74	673	6	114	0	Inf
260156	k__Bacteria; p__Firmicutes; c__Clostridia; o__Clostridiales; f__; g__; s__	0.00793651	0.146935	0	0	0	0	0	11	6	6	16	8	8	0	Inf
260828	k__Bacteria; p__Firmicutes; c__Clostridia; o__Clostridiales; f__; g__; s__	0.00793651	0.146935	0	0	0	0	0	5	4	6	10	5	5	0	Inf
261016	k__Bacteria; p__Firmicutes; c__Clostridia; o__Clostridiales; f__Lachnospiraceae; g__Blautia; s__	0.00793651	0.146935	0	0	0	0	0	120	98	180	159	154	154	0	Inf
261894	k__Bacteria; p__Firmicutes; c__Clostridia; o__Clostridiales; f__Ruminococcaceae; g__Oscillospira; s__	0.00793651	0.146935	1	0	0	1	0	5	10	10	11	2	10	0	Inf
262104	k__Bacteria; p__Firmicutes; c__Clostridia; o__Clostridiales; f__Lachnospiraceae; g__; s__	0.00793651	0.146935	14	75	22	14	10	0	1	0	0	0	0	14	Inf
263272	k__Bacteria; p__Firmicutes; c__Clostridia; o__Clostridiales; f__Ruminococcaceae; g__Ruminococcus; s__	0.00793651	0.146935	0	0	0	0	0	94	34	180	51	63	63	0	Inf
263546	k__Bacteria; p__Firmicutes; c__Clostridia; o__Clostridiales; f__Ruminococcaceae; g__Oscillospira; s__	0.00793651	0.146935	1003	155	84	564	281	3054	5724	11172	5528	2567	5528	281	0.0508321
264101	k__Bacteria; p__Firmicutes; c__Clostridia; o__Clostridiales; f__Ruminococcaceae; g__Oscillospira; s__	0.00793651	0.146935	105	476	209	278	43	0	0	0	0	1	0	209	Inf
264646	k__Bacteria; p__Firmicutes; c__Clostridia; o__Clostridiales; f__Ruminococcaceae; g__; s__	0.00793651	0.146935	0	0	0	0	0	4	2	12	5	8	5	0	Inf
264684	k__Bacteria; p__Firmicutes; c__Clostridia; o__Clostridiales; f__; g__; s__	0.00793651	0.146935	200	988	391	1849	246	4	4	2	0	7	4	391	97.75
264846	k__Bacteria; p__Firmicutes; c__Clostridia; o__Clostridiales; f__; g__; s__	0.00793651	0.146935	0	0	0	0	0	43	48	74	62	71	62	0	Inf
265940	k__Bacteria; p__Firmicutes; c__Clostridia; o__Clostridiales; f__Ruminococcaceae; g__Ruminococcus; s__	0.00793651	0.146935	126	282	22	7	5	3	0	0	0	0	0	22	Inf
266091	k__Bacteria; p__Firmicutes; c__Clostridia; o__Clostridiales; f__; g__; s__	0.00793651	0.146935	3	3	0	0	1	807	10	27	6	25	25	1	0.04
266343	k__Bacteria; p__Firmicutes; c__Clostridia; o__Clostridiales; f__; g__; s__	0.00793651	0.146935	217	257	125	264	71	989	541	1395	347	755	755	217	0.287417
266946	k__Bacteria; p__Firmicutes; c__Clostridia; o__Clostridiales; f__Lachnospiraceae; g__[Ruminococcus]; s__gnavus	0.00793651	0.146935	0	0	0	0	0	30	19	42	52	37	37	0	Inf
267124	k__Bacteria; p__Firmicutes; c__Clostridia; o__Clostridiales; f__; g__; s__	0.00793651	0.146935	2	1	15	1	0	40	18	132	41	62	41	1	0.0243902
267996	k__Bacteria; p__Firmicutes; c__Clostridia; o__Clostridiales; f__Lachnospiraceae; g__[Ruminococcus]; s__gnavus	0.00793651	0.146935	0	0	0	0	0	7	10	20	15	20	15	0	Inf
268297	k__Bacteria; p__Firmicutes; c__Clostridia; o__Clostridiales; f__Lachnospiraceae; g__[Ruminococcus]; s__gnavus	0.00793651	0.146935	0	0	0	1	0	7	9	5	2	5	5	0	Inf
268620	k__Bacteria; p__Firmicutes; c__Clostridia; o__Clostridiales; f__Lachnospiraceae; g__; s__	0.00793651	0.146935	1	0	0	0	0	28	5	5	2	14	5	0	Inf
268733	k__Bacteria; p__Firmicutes; c__Clostridia; o__Clostridiales; f__Clostridiaceae; g__; s__	0.00793651	0.146935	2118	1599	3553	963	2522	4	1	0	2	2	2	2118	1059
268844	k__Bacteria; p__Firmicutes; c__Clostridia; o__Clostridiales; f__; g__; s__	0.00793651	0.146935	3	5	2	3	0	67	11	89	31	36	36	3	0.0833333
268962	k__Bacteria; p__Firmicutes; c__Clostridia; o__Clostridiales; f__Ruminococcaceae; g__; s__	0.00793651	0.146935	1	0	1	0	0	2	3	2	4	3	3	0	Inf
269070	k__Bacteria; p__Firmicutes; c__Clostridia; o__Clostridiales; f__Ruminococcaceae; g__; s__	0.00793651	0.146935	6	13	9	8	4	2558	2245	6038	2548	3306	2558	8	0.00312744
269091	k__Bacteria; p__Firmicutes; c__Clostridia; o__Clostridiales; f__; g__; s__	0.00793651	0.146935	0	0	0	0	0	2	2	6	8	5	5	0	Inf
271822	k__Bacteria; p__Firmicutes; c__Clostridia; o__Clostridiales; f__; g__; s__	0.00793651	0.146935	49	1206	17	31	8	3554	2655	2485	2068	1464	2485	31	0.0124748
271866	k__Bacteria; p__Firmicutes; c__Clostridia; o__Clostridiales; f__; g__; s__	0.00793651	0.146935	590	313	1040	431	336	2	0	1	0	1	1	431	431
272576	k__Bacteria; p__Firmicutes; c__Clostridia; o__Clostridiales; f__Ruminococcaceae; g__Oscillospira; s__	0.00793651	0.146935	3	0	0	1	0	13	7	72	30	12	13	0	Inf
272953	k__Bacteria; p__Firmicutes; c__Clostridia; o__Clostridiales; f__Ruminococcaceae; g__Oscillospira; s__	0.00793651	0.146935	0	0	0	0	0	106	62	102	103	72	102	0	Inf
273043	k__Bacteria; p__Firmicutes; c__Clostridia; o__Clostridiales; f__; g__; s__	0.00793651	0.146935	0	0	0	0	0	15	17	32	23	38	23	0	Inf
273737	k__Bacteria; p__Firmicutes; c__Clostridia; o__Clostridiales; f__Ruminococcaceae; g__; s__	0.00793651	0.146935	0	44	0	0	1	74	67	230	180	193	180	0	Inf
273937	k__Bacteria; p__Firmicutes; c__Clostridia; o__Clostridiales; f__; g__; s__	0.00793651	0.146935	0	0	0	0	0	6	1	12	5	11	6	0	Inf
273967	k__Bacteria; p__Firmicutes; c__Clostridia; o__Clostridiales; f__Lachnospiraceae; g__; s__	0.00793651	0.146935	60	147	84	185	65	48	15	6	0	30	15	84	5.6
274312	k__Bacteria; p__Firmicutes; c__Clostridia; o__Clostridiales; f__; g__; s__	0.00793651	0.146935	0	0	0	0	0	5	1	3	2	2	2	0	Inf
275218	k__Bacteria; p__Firmicutes; c__Clostridia; o__Clostridiales; f__Ruminococcaceae; g__; s__	0.00793651	0.146935	0	1	0	1	0	671	202	732	101	754	671	0	Inf
276499	k__Bacteria; p__Firmicutes; c__Clostridia; o__Clostridiales; f__; g__; s__	0.00793651	0.146935	0	2	0	0	0	13	9	5	3	5	5	0	Inf
2797565	k__Bacteria; p__Firmicutes; c__Clostridia; o__Clostridiales; f__[Mogibacteriaceae]; g__; s__	0.00793651	0.146935	136	391	156	244	136	1	0	0	0	0	0	156	Inf
2883968	k__Bacteria; p__Firmicutes; c__Clostridia; o__Clostridiales; f__; g__; s__	0.00793651	0.146935	251	319	212	93	316	23	0	0	2	0	0	251	Inf
2897332	k__Bacteria; p__Firmicutes; c__Clostridia; o__Clostridiales; f__Lachnospiraceae; g__[Ruminococcus]; s__gnavus	0.00793651	0.146935	125	195	155	155	124	286	205	267	234	209	234	155	0.662393
290607	k__Bacteria; p__Firmicutes; c__Clostridia; o__Clostridiales; f__Lachnospiraceae; g__; s__	0.00793651	0.146935	7	14	8	48	3	0	0	0	0	0	0	8	Inf
290647	k__Bacteria; p__Firmicutes; c__Clostridia; o__Clostridiales; f__Clostridiaceae; g__; s__	0.00793651	0.146935	35	28	54	14	37	0	0	1	0	1	0	35	Inf
296420	k__Bacteria; p__Firmicutes; c__Clostridia; o__Clostridiales; f__Clostridiaceae; g__Clostridium; s__	0.00793651	0.146935	8	3	3	2	12	0	0	0	0	0	0	3	Inf
300662	k__Bacteria; p__Firmicutes; c__Clostridia; o__Clostridiales; f__Clostridiaceae; g__Sarcina; s__	0.00793651	0.146935	66	51	70	25	22	0	0	0	0	0	0	51	Inf
304779	k__Bacteria; p__Firmicutes; c__Clostridia; o__Clostridiales; f__Clostridiaceae; g__Clostridium; s__perfringens	0.00793651	0.146935	54	26	65	27	44	0	0	1	0	0	0	44	Inf
309916	k__Bacteria; p__Firmicutes; c__Clostridia; o__Clostridiales; f__Lachnospiraceae; g__[Ruminococcus]; s__gnavus	0.00793651	0.146935	0	0	0	0	0	69	72	162	118	111	111	0	0
310653	k__Bacteria; p__Firmicutes; c__Clostridia; o__Clostridiales; f__; g__; s__	0.00793651	0.146935	0	0	0	0	0	10	5	18	5	9	9	0	0
313069	k__Bacteria; p__Firmicutes; c__Clostridia; o__Clostridiales; f__Clostridiaceae; g__; s__	0.00793651	0.146935	0	0	0	2	1	8	3	3	17	7	7	0	0
313274	k__Bacteria; p__Firmicutes; c__Clostridia; o__Clostridiales; f__Ruminococcaceae; g__Oscillospira; s__	0.00793651	0.146935	9	1	0	2	1	32	21	86	27	17	27	1	0.037037
316378	k__Bacteria; p__Firmicutes; c__Clostridia; o__Clostridiales; f__Clostridiaceae; g__; s__	0.00793651	0.146935	8	4	19	2	8	0	0	0	0	0	0	8	Inf
321484	k__Bacteria; p__Firmicutes; c__Clostridia; o__Clostridiales; f__Ruminococcaceae; g__Oscillospira; s__	0.00793651	0.146935	74	12	6	41	19	210	387	723	388	212	387	19	0.0490956
322367	k__Bacteria; p__Firmicutes; c__Clostridia; o__Clostridiales; f__Clostridiaceae; g__; s__	0.00793651	0.146935	3	5	6	1	3	0	0	0	0	0	0	3	Inf
328212	k__Bacteria; p__Firmicutes; c__Clostridia; o__Clostridiales; f__Ruminococcaceae; g__; s__	0.00793651	0.146935	2	2	2	13	1	143	27	284	90	97	97	2	0.0206186
328905	k__Bacteria; p__Firmicutes; c__Clostridia; o__Clostridiales; f__Ruminococcaceae; g__Oscillospira; s__	0.00793651	0.146935	1	0	0	0	1	123	2	184	93	96	96	0	Inf
335057	k__Bacteria; p__Firmicutes; c__Clostridia; o__Clostridiales; f__; g__; s__	0.00793651	0.146935	1	0	1	0	0	19	6	27	13	14	14	0	Inf
335267	k__Bacteria; p__Firmicutes; c__Clostridia; o__Clostridiales; f__; g__; s__	0.00793651	0.146935	438	90	49	32	38	8	1	1	0	6	1	49	49
337727	k__Bacteria; p__Firmicutes; c__Clostridia; o__Clostridiales; f__Ruminococcaceae; g__Oscillospira; s__	0.00793651	0.146935	0	2	2	2	2	115	221	309	308	41	221	2	0.00904977
344108	k__Bacteria; p__Firmicutes; c__Clostridia; o__Clostridiales; f__Lachnospiraceae; g__; s__	0.00793651	0.146935	198	256	93	44	104	2	0	1	0	0	0	104	Inf
344400	k__Bacteria; p__Firmicutes; c__Clostridia; o__Clostridiales; f__; g__; s__	0.00793651	0.146935	3	0	1	5	1	17	9	33	10	23	17	1	0.0588235
348197	k__Bacteria; p__Firmicutes; c__Clostridia; o__Clostridiales; f__; g__; s__	0.00793651	0.146935	1	2	0	1	0	4	4	6	7	6	6	1	0.166667
348785	k__Bacteria; p__Firmicutes; c__Clostridia; o__Clostridiales; f__; g__; s__	0.00793651	0.146935	1	6	3	6	2	96	49	244	74	55	74	3	0.0405405
352008	k__Bacteria; p__Firmicutes; c__Clostridia; o__Clostridiales; f__Lachnospiraceae; g__[Ruminococcus]; s__gnavus	0.00793651	0.146935	0	0	0	0	0	15	22	31	33	27	27	0	Inf
365536	k__Bacteria; p__Firmicutes; c__Clostridia; o__Clostridiales; f__Ruminococcaceae; g__Oscillospira; s__	0.00793651	0.146935	9	34	29	62	21	0	0	1	0	0	0	29	Inf
3750373	k__Bacteria; p__Firmicutes; c__Clostridia; o__Clostridiales; f__Lachnospiraceae; g__[Ruminococcus]; s__gnavus	0.00793651	0.146935	0	0	0	0	0	32	32	61	57	54	54	0	Inf
3868285	k__Bacteria; p__Firmicutes; c__Clostridia; o__Clostridiales; f__; g__; s__	0.00793651	0.146935	11	5	3	6	0	60	39	91	38	38	39	5	0.128205
3903651	k__Bacteria; p__Firmicutes; c__Clostridia; o__Clostridiales; f__Ruminococcaceae; g__Oscillospira; s__	0.00793651	0.146935	25	9	38	246	488	1	0	1	2	1	1	38	38
3919797	k__Bacteria; p__Firmicutes; c__Clostridia; o__Clostridiales; f__; g__; s__	0.00793651	0.146935	3147	666	159	89	198	17	40	49	21	29	29	198	6.82759
4041792	k__Bacteria; p__Firmicutes; c__Clostridia; o__Clostridiales; f__Clostridiaceae; g__; s__	0.00793651	0.146935	12	7	16	3	7	0	0	0	1	0	0	7	Inf
417981	k__Bacteria; p__Firmicutes; c__Clostridia; o__Clostridiales; f__[Mogibacteriaceae]; g__; s__	0.00793651	0.146935	0	0	0	0	0	19	9	16	18	13	16	0	Inf
4331723	k__Bacteria; p__Firmicutes; c__Clostridia; o__Clostridiales; f__Ruminococcaceae; g__Ruminococcus; s__	0.00793651	0.146935	2	3	28	13	14	0	0	1	1	0	0	13	Inf
4342104	k__Bacteria; p__Firmicutes; c__Clostridia; o__Clostridiales; f__Ruminococcaceae; g__Anaerotruncus; s__	0.00793651	0.146935	196	247	188	502	254	14	22	28	12	7	14	247	17.6429
4343528	k__Bacteria; p__Firmicutes; c__Clostridia; o__Clostridiales; f__Ruminococcaceae; g__Oscillospira; s__	0.00793651	0.146935	6	2	0	3	2	29	58	97	59	23	58	2	0.0344828
4364747	k__Bacteria; p__Firmicutes; c__Clostridia; o__Clostridiales; f__Clostridiaceae; g__; s__	0.00793651	0.146935	7	5	11	20	22	0	0	0	0	0	0	11	Inf
4383953	k__Bacteria; p__Firmicutes; c__Clostridia; o__Clostridiales; f__Clostridiaceae; g__; s__	0.00793651	0.146935	7827	5351	13796	3746	9530	7	4	6	6	8	6	7827	1304.5
4393532	k__Bacteria; p__Actinobacteria; c__Coriobacteriia; o__Coriobacteriales; f__Coriobacteriaceae; g__Eggerthella; s__lenta	0.00793651	0.146935	13	1	2	5	5	0	0	0	0	0	0	5	Inf
4440624	k__Bacteria; p__Firmicutes; c__Clostridia; o__Clostridiales; f__Lachnospiraceae; g__; s__	0.00793651	0.146935	19	97	43	41	7	223	359	726	310	436	359	41	0.114206
4446320	k__Bacteria; p__Firmicutes; c__Clostridia; o__Clostridiales; f__Clostridiaceae; g__; s__	0.00793651	0.146935	10	4	11	11	3	0	0	0	0	0	0	10	Inf
4460604	k__Bacteria; p__Firmicutes; c__Clostridia; o__Clostridiales; f__; g__; s__	0.00793651	0.146935	81	2541	3126	1170	1023	5	3	5	4	8	5	1170	234
4480557	k__Bacteria; p__Firmicutes; c__Clostridia; o__Clostridiales; f__Lachnospiraceae; g__; s__	0.00793651	0.146935	1	0	0	0	0	29	4	64	2	89	29	0	Inf
566391	k__Bacteria; p__Firmicutes; c__Clostridia; o__Clostridiales; f__; g__; s__	0.00793651	0.146935	22	7	63	8	15	0	0	0	0	0	0	15	Inf
586453	k__Bacteria; p__Firmicutes; c__Clostridia; o__Clostridiales; f__Christensenellaceae; g__; s__	0.00793651	0.146935	13	8	7	23	24	0	0	0	0	0	0	13	Inf
609589	k__Bacteria; p__Firmicutes; c__Clostridia; o__Clostridiales; f__; g__; s__	0.00793651	0.146935	1032	686	3506	277	942	0	1	0	0	0	0	942	Inf
621700	k__Bacteria; p__Firmicutes; c__Clostridia; o__Clostridiales; f__; g__; s__	0.00793651	0.146935	27	4	4	1	122	0	0	0	0	0	0	4	Inf
635059	k__Bacteria; p__Firmicutes; c__Clostridia; o__Clostridiales; f__; g__; s__	0.00793651	0.146935	917	809	284	1310	368	10668	6488	18482	8289	7585	8289	809	0.0975992
637934	k__Bacteria; p__Firmicutes; c__Clostridia; o__Clostridiales; f__; g__; s__	0.00793651	0.146935	101	219	26	73	88	0	6	19	0	5	5	88	17.6
659831	k__Bacteria; p__Firmicutes; c__Clostridia; o__Clostridiales; f__; g__; s__	0.00793651	0.146935	2	1	0	0	2	15	12	33	9	8	12	1	0.0833333
683621	k__Bacteria; p__Firmicutes; c__Clostridia; o__Clostridiales; f__Clostridiaceae; g__; s__	0.00793651	0.146935	4	9	2	1	5	0	0	0	0	0	0	4	Inf
688923	k__Bacteria; p__Firmicutes; c__Clostridia; o__Clostridiales; f__Ruminococcaceae; g__; s__	0.00793651	0.146935	72	243	102	146	173	0	0	1	1	0	0	146	Inf
771140	k__Bacteria; p__Firmicutes; c__Clostridia; o__Clostridiales; f__; g__; s__	0.00793651	0.146935	2	0	3	0	0	21	14	34	13	15	15	0	Inf
New.CleanUp.ReferenceOTU10408	k__Bacteria; p__Firmicutes; c__Clostridia; o__Clostridiales; f__Clostridiaceae	0.00793651	0.146935	4	3	4	1	2	0	0	0	0	0	0	3	Inf
New.CleanUp.ReferenceOTU10446	k__Bacteria; p__Firmicutes; c__Clostridia; o__Clostridiales; f__; g__; s__	0.00793651	0.146935	1	1	6	1	3	0	0	0	0	0	0	1	Inf
New.CleanUp.ReferenceOTU11108	k__Bacteria; p__Firmicutes; c__Clostridia; o__Clostridiales; f__Clostridiaceae; g__Clostridium; s__	0.00793651	0.146935	5	4	6	2	1	0	0	0	0	0	0	4	Inf
New.CleanUp.ReferenceOTU11912	k__Bacteria; p__Firmicutes; c__Clostridia; o__Clostridiales; f__Ruminococcaceae	0.00793651	0.146935	0	0	0	0	0	1	1	5	2	1	1	0	Inf
New.CleanUp.ReferenceOTU12112	k__Bacteria; p__Firmicutes; c__Clostridia; o__Clostridiales; f__Lachnospiraceae; g__; s__	0.00793651	0.146935	1	2	6	26	3	0	0	0	0	0	0	3	Inf
New.CleanUp.ReferenceOTU12839	k__Bacteria; p__Firmicutes; c__Clostridia; o__Clostridiales; f__Lachnospiraceae; g__[Ruminococcus]; s__gnavus	0.00793651	0.146935	0	0	0	0	0	1	3	2	3	2	2	0	Inf
New.CleanUp.ReferenceOTU13156	k__Bacteria; p__Firmicutes; c__Clostridia; o__Clostridiales; f__Clostridiaceae; g__; s__	0.00793651	0.146935	6	2	2	1	1	0	0	0	0	0	0	2	Inf
New.CleanUp.ReferenceOTU14646	k__Bacteria; p__Firmicutes; c__Clostridia; o__Clostridiales; f__; g__; s__	0.00793651	0.146935	1	11	6	5	3	0	0	0	0	0	0	5	Inf
New.CleanUp.ReferenceOTU16721	k__Bacteria; p__Firmicutes; c__Clostridia; o__Clostridiales; f__Ruminococcaceae; g__Oscillospira; s__	0.00793651	0.146935	0	0	0	0	0	2	2	1	2	3	2	0	Inf
New.CleanUp.ReferenceOTU16961	k__Bacteria; p__Firmicutes; c__Clostridia; o__Clostridiales; f__; g__; s__	0.00793651	0.146935	0	0	0	0	0	2	2	3	2	1	2	0	Inf
New.CleanUp.ReferenceOTU19365	k__Bacteria; p__Firmicutes; c__Clostridia; o__Clostridiales; f__; g__; s__	0.00793651	0.146935	20	33	17	32	8	0	0	1	0	0	0	20	Inf
New.CleanUp.ReferenceOTU20512	k__Bacteria; p__Firmicutes; c__Clostridia; o__Clostridiales; f__Lachnospiraceae; g__; s__	0.00793651	0.146935	0	0	0	0	0	1	3	2	3	3	3	0	Inf
New.CleanUp.ReferenceOTU21787	k__Bacteria; p__Firmicutes; c__Clostridia; o__Clostridiales; f__Clostridiaceae; g__; s__	0.00793651	0.146935	4	1	14	3	13	0	0	0	0	0	0	4	Inf
New.CleanUp.ReferenceOTU23808	k__Bacteria; p__Firmicutes; c__Clostridia; o__Clostridiales; f__Ruminococcaceae; g__; s__	0.00793651	0.146935	0	0	0	0	0	4	2	4	6	6	4	0	Inf
New.CleanUp.ReferenceOTU25488	k__Bacteria; p__Firmicutes; c__Clostridia; o__Clostridiales; f__Clostridiaceae; g__; s__	0.00793651	0.146935	5	1	3	2	3	0	0	0	0	0	0	3	Inf
New.CleanUp.ReferenceOTU25947	k__Bacteria; p__Firmicutes; c__Clostridia; o__Clostridiales; f__; g__; s__	0.00793651	0.146935	0	0	0	0	0	9	8	40	7	11	9	0	Inf
New.CleanUp.ReferenceOTU26772	k__Bacteria; p__Firmicutes; c__Clostridia; o__Clostridiales; f__; g__; s__	0.00793651	0.146935	5	25	1	1	4	0	0	0	0	0	0	4	Inf
New.CleanUp.ReferenceOTU27747	k__Bacteria; p__Firmicutes; c__Clostridia; o__Clostridiales; f__; g__; s__	0.00793651	0.146935	0	7	0	0	0	33	18	23	20	16	20	0	Inf
New.CleanUp.ReferenceOTU31169	k__Bacteria; p__Firmicutes; c__Clostridia; o__Clostridiales; f__Ruminococcaceae; g__; s__	0.00793651	0.146935	0	0	0	0	0	3	3	6	1	2	3	0	Inf
New.CleanUp.ReferenceOTU325	k__Bacteria; p__Firmicutes; c__Clostridia; o__Clostridiales; f__; g__; s__	0.00793651	0.146935	1	0	0	0	0	14	9	19	9	6	9	0	Inf
New.CleanUp.ReferenceOTU34490	k__Bacteria; p__Firmicutes; c__Clostridia; o__Clostridiales; f__Clostridiaceae; g__; s__	0.00793651	0.146935	18	7	10	6	11	0	0	0	0	0	0	10	Inf
New.CleanUp.ReferenceOTU39397	k__Bacteria; p__Firmicutes; c__Clostridia; o__Clostridiales; f__Ruminococcaceae; g__; s__	0.00793651	0.146935	0	0	0	0	0	10	6	12	8	13	10	0	Inf
New.CleanUp.ReferenceOTU39923	k__Bacteria; p__Firmicutes; c__Clostridia; o__Clostridiales; f__; g__; s__	0.00793651	0.146935	0	1	0	0	0	10	13	9	3	3	9	0	Inf
New.CleanUp.ReferenceOTU41686	k__Bacteria; p__Firmicutes; c__Clostridia; o__Clostridiales; f__; g__; s__	0.00793651	0.146935	0	1	0	0	0	3	2	5	2	4	3	0	Inf
New.CleanUp.ReferenceOTU42707	k__Bacteria; p__Firmicutes; c__Clostridia; o__Clostridiales; f__; g__; s__	0.00793651	0.146935	0	0	0	0	0	4	3	7	10	3	4	0	Inf
New.CleanUp.ReferenceOTU43973	k__Bacteria; p__Firmicutes; c__Clostridia; o__Clostridiales; f__; g__; s__	0.00793651	0.146935	4	5	1	2	4	0	0	0	0	0	0	4	Inf
New.CleanUp.ReferenceOTU4406	k__Bacteria; p__Firmicutes; c__Clostridia; o__Clostridiales; f__Clostridiaceae	0.00793651	0.146935	4	1	19	1	7	0	0	0	0	0	0	4	Inf
New.CleanUp.ReferenceOTU45229	k__Bacteria; p__Firmicutes; c__Clostridia; o__Clostridiales; f__Ruminococcaceae; g__; s__	0.00793651	0.146935	9	9	7	6	7	3	0	0	5	1	1	7	7
New.CleanUp.ReferenceOTU45768	k__Bacteria; p__Firmicutes; c__Clostridia; o__Clostridiales; f__; g__; s__	0.00793651	0.146935	3	2	42	1	6	0	0	0	0	0	0	3	Inf
New.CleanUp.ReferenceOTU47083	k__Bacteria; p__Firmicutes; c__Clostridia; o__Clostridiales; f__; g__; s__	0.00793651	0.146935	9	3	26	1	7	0	0	0	0	0	0	7	Inf
New.CleanUp.ReferenceOTU47152	k__Bacteria; p__Firmicutes; c__Clostridia; o__Clostridiales; f__; g__; s__	0.00793651	0.146935	0	0	0	0	0	2	2	2	1	1	2	0	Inf
New.CleanUp.ReferenceOTU47638	k__Bacteria; p__Firmicutes; c__Clostridia; o__Clostridiales; f__; g__; s__	0.00793651	0.146935	0	0	0	1	0	5	3	9	2	2	3	0	Inf
New.CleanUp.ReferenceOTU49175	k__Bacteria; p__Bacteroidetes; c__Bacteroidia; o__Bacteroidales; f__Porphyromonadaceae; g__Parabacteroides; s__	0.00793651	0.146935	14	12	26	7	22	0	0	0	0	0	0	14	Inf
New.CleanUp.ReferenceOTU50247	k__Bacteria; p__Bacteroidetes; c__Bacteroidia; o__Bacteroidales; f__S24-7; g__; s__	0.00793651	0.146935	1	3	2	2	4	0	0	0	0	0	0	2	Inf
New.CleanUp.ReferenceOTU5116	k__Bacteria; p__Firmicutes; c__Clostridia; o__Clostridiales; f__; g__; s__	0.00793651	0.146935	3	1	1	2	3	0	0	0	0	0	0	2	Inf
New.CleanUp.ReferenceOTU51323	k__Bacteria; p__Firmicutes; c__Clostridia; o__Clostridiales; f__; g__; s__	0.00793651	0.146935	38	9	3	6	2	0	1	0	0	0	0	6	Inf
New.CleanUp.ReferenceOTU51972	k__Bacteria; p__Firmicutes; c__Clostridia; o__Clostridiales; f__; g__; s__	0.00793651	0.146935	21	7	4	3	5	0	0	0	0	0	0	5	Inf
New.CleanUp.ReferenceOTU52045	k__Bacteria; p__Firmicutes; c__Clostridia; o__Clostridiales; f__; g__; s__	0.00793651	0.146935	5	4	2	2	0	41	19	106	36	38	38	2	0.0526316
New.CleanUp.ReferenceOTU53736	k__Bacteria; p__Firmicutes; c__Clostridia; o__Clostridiales; f__; g__; s__	0.00793651	0.146935	0	0	0	0	0	1	3	7	3	2	3	0	Inf
New.CleanUp.ReferenceOTU55163	k__Bacteria; p__Firmicutes; c__Clostridia; o__Clostridiales; f__; g__; s__	0.00793651	0.146935	1	0	0	0	0	9	6	12	2	5	6	0	Inf
New.CleanUp.ReferenceOTU55423	k__Bacteria; p__Firmicutes; c__Clostridia; o__Clostridiales; f__; g__; s__	0.00793651	0.146935	32	4	5	3	7	0	2	1	1	2	1	5	5
New.CleanUp.ReferenceOTU57405	k__Bacteria; p__Firmicutes; c__Clostridia; o__Clostridiales; f__; g__; s__	0.00793651	0.146935	0	0	0	0	0	3	1	3	1	1	1	0	Inf
New.CleanUp.ReferenceOTU57835	k__Bacteria; p__Firmicutes; c__Clostridia; o__Clostridiales; f__Clostridiaceae; g__; s__	0.00793651	0.146935	6	7	35	7	17	0	0	0	0	0	0	7	Inf
New.CleanUp.ReferenceOTU59192	k__Bacteria; p__Firmicutes; c__Clostridia; o__Clostridiales; f__Ruminococcaceae; g__; s__	0.00793651	0.146935	0	0	0	0	0	6	6	14	4	6	6	0	Inf
New.CleanUp.ReferenceOTU5924	k__Bacteria; p__Firmicutes; c__Clostridia; o__Clostridiales; f__Ruminococcaceae; g__Oscillospira; s__	0.00793651	0.146935	0	0	0	0	0	3	2	8	2	2	2	0	Inf
New.CleanUp.ReferenceOTU5952	k__Bacteria; p__Firmicutes; c__Clostridia; o__Clostridiales; f__; g__; s__	0.00793651	0.146935	2	1	1	3	3	7	4	5	6	10	6	2	0.333333
New.CleanUp.ReferenceOTU59521	k__Bacteria; p__Firmicutes; c__Clostridia; o__Clostridiales; f__; g__; s__	0.00793651	0.146935	7	37	18	18	8	1	1	0	0	3	1	18	18
New.CleanUp.ReferenceOTU59575	k__Bacteria; p__Firmicutes; c__Clostridia; o__Clostridiales; f__Ruminococcaceae; g__Ruminococcus; s__	0.00793651	0.146935	2	1	0	0	0	6	3	26	5	3	5	0	Inf
New.CleanUp.ReferenceOTU6015	k__Bacteria; p__Firmicutes; c__Clostridia; o__Clostridiales; f__; g__; s__	0.00793651	0.146935	0	7	0	0	0	31	14	15	14	16	15	0	Inf
New.CleanUp.ReferenceOTU60747	k__Bacteria; p__Firmicutes; c__Clostridia; o__Clostridiales; f__Ruminococcaceae; g__; s__	0.00793651	0.146935	0	0	0	0	0	7	6	8	8	18	8	0	Inf
New.CleanUp.ReferenceOTU62476	k__Bacteria; p__Firmicutes; c__Clostridia; o__Clostridiales; f__Ruminococcaceae; g__; s__	0.00793651	0.146935	2	2	1	1	1	0	0	0	0	0	0	1	Inf
New.CleanUp.ReferenceOTU65845	k__Bacteria; p__Firmicutes; c__Clostridia; o__Clostridiales; f__Clostridiaceae; g__; s__	0.00793651	0.146935	29	35	50	11	54	0	0	0	0	0	0	35	Inf
New.CleanUp.ReferenceOTU66376	k__Bacteria; p__Firmicutes; c__Clostridia; o__Clostridiales; f__Ruminococcaceae; g__Ruminococcus; s__	0.00793651	0.146935	0	0	0	0	0	1	1	2	1	1	1	0	Inf
New.CleanUp.ReferenceOTU67143	k__Bacteria; p__Firmicutes; c__Clostridia; o__Clostridiales; f__; g__; s__	0.00793651	0.146935	0	0	0	0	0	1	1	1	2	2	1	0	Inf
New.CleanUp.ReferenceOTU6734	k__Bacteria; p__Firmicutes; c__Clostridia; o__Clostridiales; f__Clostridiaceae; g__; s__	0.00793651	0.146935	18	6	67	8	44	0	0	0	0	0	0	18	Inf
New.CleanUp.ReferenceOTU68429	k__Bacteria; p__Firmicutes; c__Clostridia; o__Clostridiales; f__; g__; s__	0.00793651	0.146935	0	3	1	1	2	9	8	19	5	9	9	1	0.111111
New.CleanUp.ReferenceOTU68593	k__Bacteria; p__Firmicutes; c__Clostridia; o__Clostridiales; f__Clostridiaceae; g__; s__	0.00793651	0.146935	11	8	44	8	23	0	0	1	0	0	0	11	Inf
New.CleanUp.ReferenceOTU68859	k__Bacteria; p__Firmicutes; c__Clostridia; o__Clostridiales; f__; g__; s__	0.00793651	0.146935	0	0	0	1	0	5	3	16	2	5	5	0	Inf
New.CleanUp.ReferenceOTU69072	k__Bacteria; p__Firmicutes; c__Clostridia; o__Clostridiales; f__Ruminococcaceae; g__; s__	0.00793651	0.146935	0	1	1	0	0	2	2	10	4	6	4	0	Inf
New.CleanUp.ReferenceOTU69286	k__Bacteria; p__Firmicutes; c__Clostridia; o__Clostridiales; f__; g__; s__	0.00793651	0.146935	0	0	1	0	0	2	2	9	3	3	3	0	Inf
New.CleanUp.ReferenceOTU70514	k__Bacteria; p__Firmicutes; c__Clostridia; o__Clostridiales; f__Ruminococcaceae; g__; s__	0.00793651	0.146935	0	0	0	0	0	5	2	22	1	10	5	0	Inf
New.CleanUp.ReferenceOTU71324	k__Bacteria; p__Firmicutes; c__Clostridia; o__Clostridiales; f__Ruminococcaceae; g__; s__	0.00793651	0.146935	0	1	0	0	1	9	7	19	12	8	9	0	Inf
New.CleanUp.ReferenceOTU715	k__Bacteria; p__Firmicutes; c__Clostridia; o__Clostridiales; f__Ruminococcaceae; g__; s__	0.00793651	0.146935	0	0	0	0	0	9	4	14	4	5	5	0	Inf
New.CleanUp.ReferenceOTU72743	k__Bacteria; p__Firmicutes; c__Clostridia; o__Clostridiales; f__Ruminococcaceae; g__Oscillospira; s__	0.00793651	0.146935	1	3	1	3	1	0	0	0	0	0	0	1	Inf
New.CleanUp.ReferenceOTU72878	k__Bacteria; p__Firmicutes; c__Clostridia; o__Clostridiales; f__Ruminococcaceae; g__; s__	0.00793651	0.146935	3	1	6	3	6	0	0	0	0	0	0	3	Inf
New.CleanUp.ReferenceOTU73975	k__Bacteria; p__Firmicutes; c__Clostridia; o__Clostridiales; f__Ruminococcaceae; g__Oscillospira; s__	0.00793651	0.146935	4	2	0	1	2	11	22	53	22	7	22	2	0.0909091
New.CleanUp.ReferenceOTU74804	k__Bacteria; p__Firmicutes; c__Clostridia; o__Clostridiales; f__Lachnospiraceae; g__[Ruminococcus]; s__gnavus	0.00793651	0.146935	0	0	0	0	0	1	2	3	2	1	2	0	Inf
New.CleanUp.ReferenceOTU74959	k__Bacteria; p__Firmicutes; c__Clostridia; o__Clostridiales; f__; g__; s__	0.00793651	0.146935	33	18	122	13	36	0	0	0	0	0	0	33	Inf
New.CleanUp.ReferenceOTU75368	k__Bacteria; p__Firmicutes; c__Clostridia; o__Clostridiales; f__; g__; s__	0.00793651	0.146935	5	6	27	3	5	0	0	0	0	0	0	5	Inf
New.CleanUp.ReferenceOTU76810	k__Bacteria; p__Firmicutes; c__Clostridia; o__Clostridiales; f__Lachnospiraceae; g__; s__	0.00793651	0.146935	0	1	0	0	0	2	2	2	3	3	2	0	Inf
New.CleanUp.ReferenceOTU77185	Unassigned	0.00793651	0.146935	1	1	5	2	3	0	0	0	0	0	0	2	Inf
New.CleanUp.ReferenceOTU79116	k__Bacteria; p__Firmicutes; c__Clostridia; o__Clostridiales; f__; g__; s__	0.00793651	0.146935	49	10	14	7	7	1	0	0	0	0	0	10	Inf
New.CleanUp.ReferenceOTU79926	k__Bacteria; p__Firmicutes; c__Clostridia; o__Clostridiales; f__Ruminococcaceae; g__Oscillospira; s__	0.00793651	0.146935	0	0	0	0	0	2	2	4	18	4	4	0	Inf
New.CleanUp.ReferenceOTU80945	k__Bacteria; p__Firmicutes; c__Clostridia; o__Clostridiales; f__Ruminococcaceae; g__Anaerotruncus; s__	0.00793651	0.146935	1	1	1	3	1	0	0	0	0	0	0	1	Inf
New.CleanUp.ReferenceOTU85156	k__Bacteria; p__Firmicutes; c__Clostridia; o__Clostridiales; f__; g__; s__	0.00793651	0.146935	0	0	0	0	0	12	2	5	6	2	5	0	Inf
New.CleanUp.ReferenceOTU8657	k__Bacteria; p__Firmicutes; c__Clostridia; o__Clostridiales; f__; g__; s__	0.00793651	0.146935	55	11	4	8	8	1	0	0	0	0	0	8	Inf
New.CleanUp.ReferenceOTU8745	k__Bacteria; p__Firmicutes; c__Clostridia; o__Clostridiales; f__Ruminococcaceae	0.00793651	0.146935	1	0	2	1	2	8	4	12	6	10	8	1	0.125
New.CleanUp.ReferenceOTU9012	k__Bacteria; p__Firmicutes; c__Clostridia; o__Clostridiales; f__; g__; s__	0.00793651	0.146935	0	0	0	0	0	2	1	3	4	1	2	0	Inf
New.ReferenceOTU103	k__Bacteria; p__Firmicutes; c__Clostridia; o__Clostridiales; f__Lachnospiraceae; g__; s__	0.00793651	0.146935	1	0	1	0	1	17	6	9	3	21	9	1	0.111111
New.ReferenceOTU104	k__Bacteria; p__Firmicutes; c__Clostridia; o__Clostridiales; f__; g__; s__	0.00793651	0.146935	42	9	12	8	7	1	0	0	0	0	0	9	Inf
New.ReferenceOTU106	k__Bacteria; p__Firmicutes; c__Clostridia; o__Clostridiales; f__; g__; s__	0.00793651	0.146935	1	6	3	5	2	63	31	89	48	30	48	3	0.0625
New.ReferenceOTU111	k__Bacteria; p__Firmicutes; c__Clostridia; o__Clostridiales; f__; g__; s__	0.00793651	0.146935	0	0	0	0	0	3	2	15	1	6	3	0	Inf
New.ReferenceOTU112	k__Bacteria; p__Firmicutes; c__Clostridia; o__Clostridiales; f__Clostridiaceae; g__; s__	0.00793651	0.146935	14	10	14	9	13	0	0	0	0	0	0	13	Inf
New.ReferenceOTU119	k__Bacteria; p__Firmicutes; c__Clostridia; o__Clostridiales; f__; g__; s__	0.00793651	0.146935	69	48	218	14	69	0	0	0	0	0	0	69	Inf
New.ReferenceOTU122	k__Bacteria; p__Firmicutes; c__Clostridia; o__Clostridiales; f__; g__; s__	0.00793651	0.146935	0	0	0	0	0	12	5	25	6	15	12	0	Inf
New.ReferenceOTU127	k__Bacteria; p__Firmicutes; c__Clostridia; o__Clostridiales; f__; g__; s__	0.00793651	0.146935	7	0	20	1	1	25	23	38	26	46	26	1	0.0384615
New.ReferenceOTU141	k__Bacteria; p__Firmicutes; c__Clostridia; o__Clostridiales; f__Ruminococcaceae; g__Oscillospira; s__	0.00793651	0.146935	3	0	0	0	0	7	8	5	4	5	5	0	Inf
New.ReferenceOTU152	k__Bacteria; p__Firmicutes; c__Clostridia; o__Clostridiales; f__; g__; s__	0.00793651	0.146935	69	33	202	15	59	0	0	0	0	0	0	59	Inf
New.ReferenceOTU171	k__Bacteria; p__Firmicutes; c__Clostridia; o__Clostridiales; f__Clostridiaceae; g__Clostridium	0.00793651	0.146935	8	12	35	16	20	0	0	0	0	0	0	16	Inf
New.ReferenceOTU172	k__Bacteria; p__Firmicutes; c__Clostridia; o__Clostridiales; f__Ruminococcaceae; g__; s__	0.00793651	0.146935	0	0	0	0	0	11	3	14	8	7	8	0	Inf
New.ReferenceOTU173	k__Bacteria; p__Firmicutes; c__Clostridia; o__Clostridiales; f__Clostridiaceae; g__; s__	0.00793651	0.146935	8	7	64	17	29	0	0	0	0	0	0	17	Inf
New.ReferenceOTU192	k__Bacteria; p__Firmicutes; c__Clostridia; o__Clostridiales; f__; g__; s__	0.00793651	0.146935	4	5	1	2	0	15	9	49	12	20	15	2	0.133333
New.ReferenceOTU197	k__Bacteria; p__Deferribacteres; c__Deferribacteres; o__Deferribacterales; f__Deferribacteraceae; g__Mucispirillum; s__schaedleri	0.00793651	0.146935	67	4	1	1	1	0	0	0	0	0	0	1	Inf
New.ReferenceOTU205	k__Bacteria; p__Firmicutes; c__Clostridia; o__Clostridiales; f__Ruminococcaceae; g__; s__	0.00793651	0.146935	0	0	0	2	0	3	5	24	13	4	5	0	Inf
New.ReferenceOTU210	k__Bacteria; p__Firmicutes; c__Clostridia; o__Clostridiales; f__Ruminococcaceae; g__Oscillospira; s__	0.00793651	0.146935	5	0	0	4	3	12	12	40	25	11	12	3	0.25
New.ReferenceOTU212	k__Bacteria; p__Verrucomicrobia; c__Verrucomicrobiae; o__Verrucomicrobiales; f__Verrucomicrobiaceae; g__Akkermansia; s__muciniphila	0.00793651	0.146935	33	37	20	39	28	52	49	64	72	68	64	33	0.515625
New.ReferenceOTU22	Unassigned	0.00793651	0.146935	25	26	26	21	71	18	18	6	0	15	15	26	1.73333
New.ReferenceOTU221	k__Bacteria; p__Firmicutes; c__Clostridia; o__Clostridiales; f__; g__; s__	0.00793651	0.146935	3	8	2	1	2	0	0	0	0	0	0	2	Inf
New.ReferenceOTU25	k__Bacteria; p__Firmicutes; c__Clostridia; o__Clostridiales; f__Ruminococcaceae; g__; s__	0.00793651	0.146935	6	2	5	2	8	0	0	0	0	0	0	5	Inf
New.ReferenceOTU259	k__Bacteria; p__Bacteroidetes; c__Bacteroidia; o__Bacteroidales; f__Porphyromonadaceae; g__Parabacteroides; s__	0.00793651	0.146935	37	26	18	41	14	75	68	97	51	52	68	26	0.382353
New.ReferenceOTU47	k__Bacteria; p__Firmicutes; c__Clostridia; o__Clostridiales; f__Ruminococcaceae; g__Oscillospira; s__	0.00793651	0.146935	11	13	4	9	6	17	29	39	27	28	28	9	0.321429
New.ReferenceOTU49	k__Bacteria; p__Firmicutes; c__Clostridia; o__Clostridiales; f__Ruminococcaceae; g__Oscillospira; s__	0.00793651	0.146935	1	0	2	2	1	6	7	13	4	6	6	1	0.166667
New.ReferenceOTU62	k__Bacteria; p__Firmicutes; c__Clostridia; o__Clostridiales; f__; g__; s__	0.00793651	0.146935	3	3	1	3	0	14	13	11	9	14	13	3	0.230769
New.ReferenceOTU63	k__Bacteria; p__Firmicutes; c__Clostridia; o__Clostridiales; f__Clostridiaceae; g__; s__	0.00793651	0.146935	100	60	152	42	98	0	0	0	0	0	0	98	Inf
New.ReferenceOTU66	k__Bacteria; p__Firmicutes; c__Clostridia; o__Clostridiales; f__; g__; s__	0.00793651	0.146935	3	0	0	1	1	5	9	27	4	9	9	1	0.111111
New.ReferenceOTU67	k__Bacteria; p__Firmicutes; c__Clostridia; o__Clostridiales; f__Ruminococcaceae; g__Oscillospira; s__	0.00793651	0.146935	0	3	0	2	0	8	9	25	9	12	9	0	Inf
New.ReferenceOTU83	k__Bacteria; p__Firmicutes; c__Clostridia; o__Clostridiales; f__Clostridiaceae; g__; s__	0.00793651	0.146935	5	3	4	2	3	0	0	0	0	0	0	3	Inf
158625	k__Bacteria; p__Firmicutes; c__Clostridia; o__Clostridiales; f__Ruminococcaceae; g__; s__	0.015873	0.24457	2	3	4	9	1	1	0	0	0	0	0	3
165046	k__Bacteria; p__Firmicutes; c__Clostridia; o__Clostridiales; f__Ruminococcaceae; g__Oscillospira; s__	0.015873	0.24457	22	76	63	71	35	0	0	31	0	1	0	63
1678333	k__Bacteria; p__Firmicutes; c__Clostridia; o__Clostridiales; f__Lachnospiraceae; g__Coprococcus; s__	0.015873	0.24457	11	34	7	23	5	1	1	0	0	5	1	11
172859	k__Bacteria; p__Firmicutes; c__Clostridia; o__Clostridiales; f__; g__; s__	0.015873	0.24457	14	48	34	2	3	2	1	0	0	0	0	14
174320	k__Bacteria; p__Firmicutes; c__Clostridia; o__Clostridiales; f__; g__; s__	0.015873	0.24457	6	8	3	1	0	8	14	16	24	28	16	3
178959	k__Bacteria; p__Firmicutes; c__Clostridia; o__Clostridiales; f__Ruminococcaceae; g__Oscillospira; s__	0.015873	0.24457	79	1253	424	886	364	22	18	212	7	33	22	424
184903	k__Bacteria; p__Firmicutes; c__Clostridia; o__Clostridiales; f__Lachnospiraceae; g__[Ruminococcus]; s__gnavus	0.015873	0.24457	8	3	2	1	2	8	48	11	17	10	11	2
185222	k__Bacteria; p__Firmicutes; c__Clostridia; o__Clostridiales; f__Clostridiaceae; g__; s__	0.015873	0.24457	13	78	87	41	74	6	15	4	12	6	6	74
188533	k__Bacteria; p__Firmicutes; c__Clostridia; o__Clostridiales; f__Ruminococcaceae; g__; s__	0.015873	0.24457	8	0	1	2	1	11	6	15	16	16	15	1
228140	k__Bacteria; p__Firmicutes; c__Clostridia; o__Clostridiales; f__[Mogibacteriaceae]; g__; s__	0.015873	0.24457	37	199	34	30	109	360	229	153	546	248	248	37
258423	k__Bacteria; p__Firmicutes; c__Clostridia; o__Clostridiales; f__; g__; s__	0.015873	0.24457	0	0	0	0	1	1609	823	1	945	662	823	0
262527	k__Bacteria; p__Firmicutes; c__Clostridia; o__Clostridiales; f__; g__; s__	0.015873	0.24457	5	1	13	1	0	11	17	33	16	19	17	1
263687	k__Bacteria; p__Firmicutes; c__Clostridia; o__Clostridiales; f__Lachnospiraceae; g__; s__	0.015873	0.24457	26	29	11	116	19	3	4	0	12	2	3	26
266413	k__Bacteria; p__Firmicutes; c__Clostridia; o__Clostridiales; f__Lachnospiraceae; g__; s__	0.015873	0.24457	8	1	1	10	2	16	10	33	11	12	12	2
268596	k__Bacteria; p__Firmicutes; c__Clostridia; o__Clostridiales; f__Ruminococcaceae; g__Oscillospira; s__	0.015873	0.24457	2	4	4	4	1	0	0	1	0	0	0	4
268720	k__Bacteria; p__Firmicutes; c__Clostridia; o__Clostridiales; f__Ruminococcaceae; g__Ruminococcus; s__	0.015873	0.24457	1	36	18	14	75	64	77	82	78	126	78	18
276996	k__Bacteria; p__Firmicutes; c__Clostridia; o__Clostridiales; f__Ruminococcaceae; g__Oscillospira; s__	0.015873	0.24457	2	2	0	7	1	13	3	24	17	9	13	2
287507	k__Bacteria; p__Firmicutes; c__Clostridia; o__Clostridiales; f__Lachnospiraceae; g__; s__	0.015873	0.24457	1	0	0	0	0	5	3	5	1	7	5	0
292962	k__Bacteria; p__Firmicutes; c__Clostridia; o__Clostridiales; f__Ruminococcaceae; g__Oscillospira; s__	0.015873	0.24457	2	0	0	0	0	1	8	13	7	3	7	0
311859	k__Bacteria; p__Firmicutes; c__Clostridia; o__Clostridiales; f__Ruminococcaceae; g__Oscillospira; s__	0.015873	0.24457	0	2	0	1	0	4	4	11	6	2	4	0
322609	k__Bacteria; p__Firmicutes; c__Clostridia; o__Clostridiales; f__; g__; s__	0.015873	0.24457	0	2	0	4	0	7	3	7	10	7	7	0
328391	k__Bacteria; p__Firmicutes; c__Clostridia; o__Clostridiales; f__Ruminococcaceae; g__; s__	0.015873	0.24457	23	1	9	17	3	56	21	81	51	59	56	9
335965	k__Bacteria; p__Firmicutes; c__Clostridia; o__Clostridiales; f__Lachnospiraceae; g__; s__	0.015873	0.24457	8	5	2	17	6	2	0	0	0	0	0	6
343420	k__Bacteria; p__Firmicutes; c__Clostridia; o__Clostridiales; f__; g__; s__	0.015873	0.24457	1	2	0	0	0	7	7	6	4	2	6	0
349246	k__Bacteria; p__Firmicutes; c__Clostridia; o__Clostridiales; f__Ruminococcaceae; g__; s__	0.015873	0.24457	20	25	1	17	2	70	25	99	59	50	59	17
356455	k__Bacteria; p__Firmicutes; c__Clostridia; o__Clostridiales; f__; g__; s__	0.015873	0.24457	2	7	3	2	1	0	0	0	0	1	0	2
4345268	k__Bacteria; p__Firmicutes; c__Clostridia; o__Clostridiales; f__Lachnospiraceae; g__; s__	0.015873	0.24457	11	9	2	14	3	123	20	40	12	50	40	9
4410988	k__Bacteria; p__Firmicutes; c__Clostridia; o__Clostridiales; f__Ruminococcaceae; g__Oscillospira; s__	0.015873	0.24457	1841	3529	378	1285	661	4502	3502	7359	3811	4705	4502	1285
4439469	k__Bacteria; p__Firmicutes; c__Clostridia; o__Clostridiales; f__Ruminococcaceae; g__; s__	0.015873	0.24457	734	379	1173	892	4223	291	419	147	233	282	282	892
4480555	k__Bacteria; p__Firmicutes; c__Clostridia; o__Clostridiales; f__; g__; s__	0.015873	0.24457	2	1	6	125	225	398	288	920	491	211	398	6
828435	k__Bacteria; p__Firmicutes; c__Erysipelotrichi; o__Erysipelotrichales; f__Erysipelotrichaceae; g__; s__	0.015873	0.24457	2	52	276	16	136	1	0	0	0	3	0	52
98048	k__Bacteria; p__Firmicutes; c__Clostridia; o__Clostridiales; f__Ruminococcaceae; g__Oscillospira; s__	0.015873	0.24457	8	1	1	1	0	86	4	28	9	384	28	1
New.CleanUp.ReferenceOTU1334	k__Bacteria; p__Firmicutes; c__Clostridia; o__Clostridiales; f__; g__; s__	0.015873	0.24457	1	4	11	2	3	0	0	1	0	0	0	3
New.CleanUp.ReferenceOTU21680	k__Bacteria; p__Firmicutes; c__Clostridia; o__Clostridiales; f__Ruminococcaceae; g__Oscillospira; s__	0.015873	0.24457	3	0	0	0	0	8	3	21	13	6	8	0
New.CleanUp.ReferenceOTU31342	k__Bacteria; p__Firmicutes; c__Clostridia; o__Clostridiales; f__; g__; s__	0.015873	0.24457	0	0	0	0	1	4	2	8	5	1	4	0
New.CleanUp.ReferenceOTU40433	k__Bacteria; p__Bacteroidetes; c__Bacteroidia; o__Bacteroidales; f__S24-7; g__; s__	0.015873	0.24457	5	5	3	1	4	0	0	0	0	2	0	4
New.CleanUp.ReferenceOTU55439	k__Bacteria; p__Firmicutes; c__Clostridia; o__Clostridiales; f__Ruminococcaceae; g__; s__	0.015873	0.24457	0	0	0	1	0	2	2	4	2	1	2	0
New.CleanUp.ReferenceOTU56285	k__Bacteria; p__Firmicutes; c__Clostridia; o__Clostridiales; f__Lachnospiraceae; g__; s__	0.015873	0.24457	6	4	1	2	3	0	0	1	0	0	0	3
New.CleanUp.ReferenceOTU57360	k__Bacteria; p__Firmicutes; c__Clostridia; o__Clostridiales; f__Ruminococcaceae; g__Oscillospira; s__	0.015873	0.24457	3	0	1	5	1	9	20	21	19	5	19	1
New.CleanUp.ReferenceOTU68860	k__Bacteria; p__Firmicutes; c__Clostridia; o__Clostridiales; f__; g__; s__	0.015873	0.24457	0	0	0	1	0	6	1	4	3	3	3	0
New.CleanUp.ReferenceOTU68919	k__Bacteria; p__Firmicutes; c__Clostridia; o__Clostridiales; f__; g__; s__	0.015873	0.24457	6	3	1	10	1	16	7	17	11	20	16	3
New.CleanUp.ReferenceOTU70791	k__Bacteria; p__Firmicutes; c__Clostridia; o__Clostridiales; f__; g__; s__	0.015873	0.24457	2	1	0	0	0	9	7	7	4	2	7	0
New.CleanUp.ReferenceOTU71089	k__Bacteria; p__Bacteroidetes; c__Bacteroidia; o__Bacteroidales; f__Porphyromonadaceae; g__Parabacteroides; s__	0.015873	0.24457	3	3	2	4	3	9	4	6	7	13	7	3
New.CleanUp.ReferenceOTU73827	k__Bacteria; p__Firmicutes; c__Clostridia; o__Clostridiales; f__Ruminococcaceae; g__; s__	0.015873	0.24457	5	14	9	15	7	3	3	0	5	1	3	9
New.CleanUp.ReferenceOTU8058	k__Bacteria; p__Firmicutes; c__Clostridia; o__Clostridiales; f__Ruminococcaceae; g__; s__	0.015873	0.24457	7	12	0	4	2	26	10	18	27	13	18	4
New.CleanUp.ReferenceOTU84345	k__Bacteria; p__Firmicutes; c__Clostridia; o__Clostridiales; f__Lachnospiraceae; g__; s__	0.015873	0.24457	2	0	1	0	0	10	7	3	2	22	7	0
New.ReferenceOTU124	k__Bacteria; p__Firmicutes; c__Clostridia; o__Clostridiales; f__; g__; s__	0.015873	0.24457	0	0	3	0	0	15	12	17	1	23	15	0
New.ReferenceOTU183	k__Bacteria; p__Verrucomicrobia; c__Verrucomicrobiae; o__Verrucomicrobiales; f__Verrucomicrobiaceae; g__Akkermansia; s__muciniphila	0.015873	0.24457	8	7	4	10	9	13	10	21	23	29	21	8
New.ReferenceOTU37	k__Bacteria; p__Firmicutes; c__Clostridia; o__Clostridiales; f__; g__; s__	0.015873	0.24457	4	5	1	3	2	27	5	55	8	14	14	3
New.ReferenceOTU79	k__Bacteria; p__Firmicutes; c__Clostridia; o__Clostridiales; f__; g__; s__	0.015873	0.24457	1	0	6	0	2	11	5	27	7	17	11	1
New.ReferenceOTU97	k__Bacteria; p__Firmicutes; c__Clostridia; o__Clostridiales; f__Ruminococcaceae; g__; s__	0.015873	0.24457	0	1	0	0	0	6	2	4	3	1	3	0
1579962	k__Bacteria; p__Firmicutes; c__Clostridia; o__Clostridiales; f__Ruminococcaceae; g__; s__	0.0238095	0.330931	2	2	4	3	6	1	2	0	0	1	1	3
176139	k__Bacteria; p__Firmicutes; c__Clostridia; o__Clostridiales; f__; g__; s__	0.0238095	0.330931	1	3	3	1	2	42	3	559	98	104	98	2
191108	k__Bacteria; p__Firmicutes; c__Clostridia; o__Clostridiales; f__; g__; s__	0.0238095	0.330931	0	0	1	0	0	7	1	5	3	1	3	0
191558	k__Bacteria; p__Firmicutes; c__Clostridia; o__Clostridiales; f__Ruminococcaceae; g__Oscillospira; s__	0.0238095	0.330931	1	1	0	0	0	7	1	8	3	8	7	0
192180	k__Bacteria; p__Firmicutes; c__Clostridia; o__Clostridiales; f__; g__; s__	0.0238095	0.330931	0	2	0	1	0	12	1	16	4	5	5	0
192930	k__Bacteria; p__Firmicutes; c__Clostridia; o__Clostridiales; f__Ruminococcaceae; g__Oscillospira; s__	0.0238095	0.330931	3	0	2	1	1	3	8	18	17	3	8	1
197696	k__Bacteria; p__Firmicutes; c__Clostridia; o__Clostridiales; f__Ruminococcaceae; g__; s__	0.0238095	0.330931	4	8	3	1	2	14	7	21	8	19	14	3
266841	k__Bacteria; p__Firmicutes; c__Clostridia; o__Clostridiales; f__Ruminococcaceae; g__Oscillospira; s__	0.0238095	0.330931	1	2	0	2	1	3	5	20	3	2	3	1
267536	k__Bacteria; p__Firmicutes; c__Clostridia; o__Clostridiales; f__[Mogibacteriaceae]; g__; s__	0.0238095	0.330931	18	13	5	14	14	9	4	3	5	4	4	14
275288	k__Bacteria; p__Firmicutes; c__Clostridia; o__Clostridiales; f__Ruminococcaceae; g__Oscillospira; s__	0.0238095	0.330931	1	0	0	0	1	3	6	9	5	1	5	0
350717	k__Bacteria; p__Firmicutes; c__Clostridia; o__Clostridiales; f__; g__; s__	0.0238095	0.330931	0	0	0	1	1	6	4	8	4	1	4	0
3709990	k__Bacteria; p__Firmicutes; c__Erysipelotrichi; o__Erysipelotrichales; f__Erysipelotrichaceae; g__[Eubacterium]; s__dolichum	0.0238095	0.330931	4	2	12	47	46	3	2	1	1	1	1	12
4045882	k__Bacteria; p__Firmicutes; c__Clostridia; o__Clostridiales; f__Lachnospiraceae; g__; s__	0.0238095	0.330931	1	9	3	5	13	1	0	0	0	1	0	5
4448052	k__Bacteria; p__Firmicutes; c__Clostridia; o__Clostridiales; f__Ruminococcaceae; g__Oscillospira; s__	0.0238095	0.330931	0	2	0	2	1	24	11	235	2	30	24	1
New.CleanUp.ReferenceOTU12369	k__Bacteria; p__Bacteroidetes; c__Bacteroidia; o__Bacteroidales; f__Porphyromonadaceae; g__Parabacteroides; s__	0.0238095	0.330931	12	15	13	3	12	4	6	1	2	1	2	12
New.CleanUp.ReferenceOTU15984	k__Bacteria; p__Firmicutes; c__Clostridia; o__Clostridiales; f__Ruminococcaceae	0.0238095	0.330931	0	0	0	1	2	3	1	4	3	3	3	0
New.CleanUp.ReferenceOTU22014	Unassigned	0.0238095	0.330931	1	0	1	1	2	3	2	4	4	2	3	1
New.CleanUp.ReferenceOTU24324	k__Bacteria; p__Firmicutes; c__Clostridia; o__Clostridiales; f__; g__; s__	0.0238095	0.330931	0	1	0	0	0	2	2	2	1	1	2	0
New.CleanUp.ReferenceOTU27814	k__Bacteria; p__Verrucomicrobia; c__Verrucomicrobiae; o__Verrucomicrobiales; f__Verrucomicrobiaceae; g__Akkermansia; s__muciniphila	0.0238095	0.330931	1	0	0	2	0	3	2	3	5	2	3	0
New.CleanUp.ReferenceOTU3759	k__Bacteria; p__Firmicutes; c__Clostridia; o__Clostridiales; f__; g__; s__	0.0238095	0.330931	1	0	0	0	0	5	1	14	1	7	5	0
New.CleanUp.ReferenceOTU47177	k__Bacteria; p__Verrucomicrobia; c__Verrucomicrobiae; o__Verrucomicrobiales; f__Verrucomicrobiaceae; g__Akkermansia; s__muciniphila	0.0238095	0.330931	0	1	0	0	0	1	2	1	5	2	2	0
New.CleanUp.ReferenceOTU48452	k__Bacteria; p__Firmicutes; c__Clostridia; o__Clostridiales; f__Lachnospiraceae; g__; s__	0.0238095	0.330931	3	0	0	0	0	6	3	13	7	3	6	0
New.CleanUp.ReferenceOTU49793	k__Bacteria; p__Firmicutes; c__Clostridia; o__Clostridiales; f__Ruminococcaceae; g__; s__	0.0238095	0.330931	3	1	0	1	0	7	2	5	5	3	5	1
New.CleanUp.ReferenceOTU5150	k__Bacteria; p__Firmicutes; c__Clostridia; o__Clostridiales; f__Ruminococcaceae; g__Oscillospira; s__	0.0238095	0.330931	8	4	5	5	6	6	10	16	11	11	11	5
New.CleanUp.ReferenceOTU61659	k__Bacteria; p__Firmicutes; c__Erysipelotrichi; o__Erysipelotrichales; f__Erysipelotrichaceae; g__; s__	0.0238095	0.330931	0	1	0	0	0	1	1	5	8	2	2	0
New.CleanUp.ReferenceOTU71364	k__Bacteria; p__Firmicutes; c__Clostridia; o__Clostridiales; f__; g__; s__	0.0238095	0.330931	0	0	1	0	0	1	2	6	3	1	2	0
New.CleanUp.ReferenceOTU7208	Unassigned	0.0238095	0.330931	0	1	0	0	0	4	1	8	8	1	4	0
New.CleanUp.ReferenceOTU75176	k__Bacteria; p__Firmicutes; c__Clostridia; o__Clostridiales; f__; g__; s__	0.0238095	0.330931	0	3	0	0	0	15	5	9	1	1	5	0
New.CleanUp.ReferenceOTU77600	k__Bacteria; p__Firmicutes; c__Clostridia; o__Clostridiales; f__Ruminococcaceae; g__Oscillospira; s__	0.0238095	0.330931	1	2	2	1	1	5	6	3	2	8	5	1
New.CleanUp.ReferenceOTU8031	k__Bacteria; p__Firmicutes; c__Clostridia; o__Clostridiales; f__; g__; s__	0.0238095	0.330931	0	4	0	0	0	6	8	3	5	1	5	0
New.ReferenceOTU184	k__Bacteria; p__Firmicutes; c__Clostridia; o__Clostridiales; f__Lachnospiraceae; g__; s__	0.0238095	0.330931	12	6	5	5	0	20	9	19	15	12	15	5
New.ReferenceOTU196	k__Bacteria; p__Bacteroidetes; c__Bacteroidia; o__Bacteroidales; f__S24-7; g__; s__	0.0238095	0.330931	8	6	5	5	2	3	3	1	0	1	1	5
New.ReferenceOTU198	k__Bacteria; p__Firmicutes; c__Clostridia; o__Clostridiales; f__Ruminococcaceae; g__Oscillospira; s__	0.0238095	0.330931	0	0	0	0	3	4	1	6	3	5	4	0
1105328	k__Bacteria; p__Firmicutes; c__Clostridia; o__Clostridiales; f__Lachnospiraceae; g__Coprococcus; s__	0.031746	0.371746	25	316	220	88	20	33	3	0	1	11	3	88
170056	k__Bacteria; p__Firmicutes; c__Clostridia; o__Clostridiales; f__Lachnospiraceae; g__[Ruminococcus]; s__gnavus	0.031746	0.371746	4	0	0	1	1	2	20	2	7	2	2	1
176957	k__Bacteria; p__Firmicutes; c__Clostridia; o__Clostridiales; f__; g__; s__	0.031746	0.371746	140	7	10	37	9	207	40	470	149	133	149	10
177195	k__Bacteria; p__Firmicutes; c__Clostridia; o__Clostridiales; f__; g__; s__	0.031746	0.371746	760	8459	2808	2882	791	262	111	9	16	1032	111	2808
180468	k__Bacteria; p__Firmicutes; c__Clostridia; o__Clostridiales; f__Ruminococcaceae; g__Oscillospira; s__	0.031746	0.371746	2	1	0	0	1	4	5	17	5	1	5	1
182712	k__Bacteria; p__Firmicutes; c__Clostridia; o__Clostridiales; f__; g__; s__	0.031746	0.371746	50	44	18	50	3	9	2	0	0	16	2	44
187400	k__Bacteria; p__Firmicutes; c__Clostridia; o__Clostridiales; f__Ruminococcaceae; g__Ruminococcus; s__	0.031746	0.371746	1	253	114	73	352	1	0	1	0	1	1	114
1902400	k__Bacteria; p__Firmicutes; c__Clostridia; o__Clostridiales; f__Lachnospiraceae; g__; s__	0.031746	0.371746	34	53	24	127	23	15	21	11	32	12	15	34
190676	k__Bacteria; p__Firmicutes; c__Clostridia; o__Clostridiales; f__Ruminococcaceae; g__Oscillospira; s__	0.031746	0.371746	8	9	2	2	2	14	6	28	16	17	16	2
194662	k__Bacteria; p__Firmicutes; c__Clostridia; o__Clostridiales; f__; g__; s__	0.031746	0.371746	120	6	19	52	6	278	28	384	141	194	194	19
197624	k__Bacteria; p__Firmicutes; c__Clostridia; o__Clostridiales; f__Ruminococcaceae; g__; s__	0.031746	0.371746	7	21	2	2	2	22	13	26	10	25	22	2
197890	k__Bacteria; p__Firmicutes; c__Clostridia; o__Clostridiales; f__Ruminococcaceae; g__Oscillospira; s__	0.031746	0.371746	65	182	118	137	79	0	0	96	0	1	0	118
198194	k__Bacteria; p__Firmicutes; c__Clostridia; o__Clostridiales; f__Ruminococcaceae; g__Oscillospira; s__	0.031746	0.371746	484	35	12	532	179	1018	479	1056	745	597	745	179
198888	k__Bacteria; p__Firmicutes; c__Clostridia; o__Clostridiales; f__Ruminococcaceae; g__; s__	0.031746	0.371746	2348	118	368	1192	256	3840	1131	5571	3298	3813	3813	368
206324	k__Bacteria; p__Bacteroidetes; c__Bacteroidia; o__Bacteroidales; f__S24-7; g__; s__	0.031746	0.371746	109	208	79	26	202	56	31	13	3	20	20	109
2148365	k__Bacteria; p__Firmicutes; c__Clostridia; o__Clostridiales; f__Lachnospiraceae; g__; s__	0.031746	0.371746	1	1	1	6	14	0	0	1	0	0	0	1
250270	k__Bacteria; p__Firmicutes; c__Clostridia; o__Clostridiales; f__; g__; s__	0.031746	0.371746	4	227	4	123	154	249	193	624	368	187	249	123
259884	k__Bacteria; p__Firmicutes; c__Clostridia; o__Clostridiales; f__Ruminococcaceae; g__Oscillospira; s__	0.031746	0.371746	25	1	3	14	5	42	8	54	41	32	41	5
260200	k__Bacteria; p__Firmicutes; c__Clostridia; o__Clostridiales; f__; g__; s__	0.031746	0.371746	43	1	1	16	4	60	14	104	64	57	60	4
261132	k__Bacteria; p__Firmicutes; c__Clostridia; o__Clostridiales; f__Ruminococcaceae; g__; s__	0.031746	0.371746	245	7	43	86	20	383	84	523	263	290	290	43
261486	k__Bacteria; p__Firmicutes; c__Clostridia; o__Clostridiales; f__Ruminococcaceae; g__; s__	0.031746	0.371746	5	2	1	0	0	8	4	10	4	11	8	1
264586	k__Bacteria; p__Firmicutes; c__Clostridia; o__Clostridiales; f__; g__; s__	0.031746	0.371746	0	16	0	1	9	37	72	557	203	6	72	1
266411	k__Bacteria; p__Firmicutes; c__Clostridia; o__Clostridiales; f__; g__; s__	0.031746	0.371746	362	317	162	149	136	590	180	1204	1045	612	612	162
267689	k__Bacteria; p__Firmicutes; c__Clostridia; o__Clostridiales; f__Ruminococcaceae; g__; s__	0.031746	0.371746	5542	255	776	2804	585	8837	2713	13170	7908	8839	8837	776
268063	k__Bacteria; p__Firmicutes; c__Clostridia; o__Clostridiales; f__; g__; s__	0.031746	0.371746	57	11	98	11	6	236	75	405	92	221	221	11
269777	k__Bacteria; p__Firmicutes; c__Clostridia; o__Clostridiales; f__; g__; s__	0.031746	0.371746	2	22	0	0	1	86	21	37	16	24	24	1
275974	k__Bacteria; p__Actinobacteria; c__Coriobacteriia; o__Coriobacteriales; f__Coriobacteriaceae; g__Adlercreutzia; s__	0.031746	0.371746	0	0	0	0	1	2	1	1	1	2	1	0
2901246	k__Bacteria; p__Firmicutes; c__Clostridia; o__Clostridiales; f__; g__; s__	0.031746	0.371746	66	46	14	21	13	44	0	0	0	0	0	21
293754	k__Bacteria; p__Firmicutes; c__Clostridia; o__Clostridiales; f__; g__; s__	0.031746	0.371746	1	1	1	0	0	6	4	17	1	7	6	1
353073	k__Bacteria; p__Bacteroidetes; c__Bacteroidia; o__Bacteroidales; f__S24-7; g__; s__	0.031746	0.371746	8	14	3	6	11	4	1	1	4	1	1	8
414089	k__Bacteria; p__Firmicutes; c__Clostridia; o__Clostridiales; f__Ruminococcaceae; g__; s__	0.031746	0.371746	10	0	1	7	1	25	3	21	19	21	21	1
New.CleanUp.ReferenceOTU11945	k__Bacteria; p__Firmicutes; c__Clostridia; o__Clostridiales; f__Ruminococcaceae; g__Oscillospira; s__	0.031746	0.371746	1	4	1	8	1	0	0	3	0	0	0	1
New.CleanUp.ReferenceOTU12617	k__Bacteria; p__Firmicutes; c__Clostridia; o__Clostridiales; f__; g__; s__	0.031746	0.371746	0	0	6	0	0	7	2	13	2	2	2	0
New.CleanUp.ReferenceOTU13267	k__Bacteria; p__Bacteroidetes; c__Bacteroidia; o__Bacteroidales; f__Porphyromonadaceae; g__Parabacteroides; s__	0.031746	0.371746	62	82	21	28	67	22	23	7	1	12	12	62
New.CleanUp.ReferenceOTU19049	k__Bacteria; p__Firmicutes; c__Clostridia; o__Clostridiales; f__Ruminococcaceae	0.031746	0.371746	1	0	0	0	0	1	1	1	2	3	1	0
New.CleanUp.ReferenceOTU19368	k__Bacteria; p__Firmicutes; c__Clostridia; o__Clostridiales; f__; g__; s__	0.031746	0.371746	1	0	0	0	0	5	1	4	1	1	1	0
New.CleanUp.ReferenceOTU19502	k__Bacteria; p__Firmicutes; c__Clostridia; o__Clostridiales; f__Ruminococcaceae; g__Oscillospira; s__	0.031746	0.371746	0	1	0	0	0	1	2	4	1	1	1	0
New.CleanUp.ReferenceOTU22109	k__Bacteria; p__Firmicutes; c__Clostridia; o__Clostridiales; f__Ruminococcaceae; g__; s__	0.031746	0.371746	2	2	1	4	4	0	0	0	2	0	0	2
New.CleanUp.ReferenceOTU24080	k__Bacteria; p__Firmicutes; c__Clostridia; o__Clostridiales; f__Ruminococcaceae; g__; s__	0.031746	0.371746	4	6	2	1	6	1	1	0	0	1	1	4
New.CleanUp.ReferenceOTU29366	k__Bacteria; p__Firmicutes; c__Clostridia; o__Clostridiales; f__Ruminococcaceae; g__; s__	0.031746	0.371746	0	2	0	0	0	4	1	7	1	1	1	0
New.CleanUp.ReferenceOTU30330	k__Bacteria; p__Bacteroidetes; c__Bacteroidia; o__Bacteroidales; f__S24-7; g__; s__	0.031746	0.371746	5	9	4	1	7	5	0	0	0	0	0	5
New.CleanUp.ReferenceOTU38613	k__Bacteria; p__Firmicutes; c__Erysipelotrichi; o__Erysipelotrichales; f__Erysipelotrichaceae; g__Clostridium	0.031746	0.371746	0	0	0	3	0	3	2	7	4	2	3	0
New.CleanUp.ReferenceOTU39579	k__Bacteria; p__Firmicutes; c__Clostridia; o__Clostridiales; f__; g__; s__	0.031746	0.371746	10	4	1	1	1	0	0	0	0	1	0	1
New.CleanUp.ReferenceOTU44192	k__Bacteria; p__Firmicutes; c__Clostridia; o__Clostridiales; f__; g__; s__	0.031746	0.371746	1	22	8	3	2	0	0	0	0	6	0	3
New.CleanUp.ReferenceOTU45518	k__Bacteria; p__Firmicutes; c__Clostridia; o__Clostridiales; f__Ruminococcaceae; g__; s__	0.031746	0.371746	5	0	0	4	4	9	4	11	10	11	10	4
New.CleanUp.ReferenceOTU48651	k__Bacteria; p__Firmicutes; c__Clostridia; o__Clostridiales; f__Ruminococcaceae	0.031746	0.371746	19	3	10	19	6	49	12	69	70	61	61	10
New.CleanUp.ReferenceOTU51944	k__Bacteria; p__Firmicutes; c__Clostridia; o__Clostridiales; f__Ruminococcaceae; g__; s__	0.031746	0.371746	3	2	2	2	14	0	0	1	1	2	1	2
New.CleanUp.ReferenceOTU5597	k__Bacteria; p__Firmicutes; c__Clostridia; o__Clostridiales; f__Ruminococcaceae; g__Oscillospira; s__	0.031746	0.371746	1	0	0	0	0	5	4	1	1	1	1	0
New.CleanUp.ReferenceOTU65131	k__Bacteria; p__Bacteroidetes; c__Bacteroidia; o__Bacteroidales; f__S24-7; g__; s__	0.031746	0.371746	2	2	2	3	6	0	1	0	2	0	0	2
New.CleanUp.ReferenceOTU74400	k__Bacteria; p__Bacteroidetes; c__Bacteroidia; o__Bacteroidales; f__Porphyromonadaceae; g__Parabacteroides; s__	0.031746	0.371746	2	4	2	2	8	2	0	0	0	0	0	2
New.CleanUp.ReferenceOTU78254	k__Bacteria; p__Firmicutes; c__Clostridia; o__Clostridiales; f__; g__; s__	0.031746	0.371746	5	1	21	3	2	33	7	51	16	36	33	3
New.CleanUp.ReferenceOTU80553	k__Bacteria; p__Bacteroidetes; c__Bacteroidia; o__Bacteroidales; f__Porphyromonadaceae; g__Parabacteroides; s__	0.031746	0.371746	24	41	13	13	39	6	12	10	0	15	10	24
New.ReferenceOTU182	k__Bacteria; p__Bacteroidetes; c__Bacteroidia; o__Bacteroidales; f__Porphyromonadaceae; g__Parabacteroides; s__	0.031746	0.371746	772	948	398	462	1008	478	381	170	16	210	210	772
New.ReferenceOTU248	k__Bacteria; p__Bacteroidetes; c__Bacteroidia; o__Bacteroidales; f__S24-7; g__; s__	0.031746	0.371746	138	143	57	78	143	72	70	32	0	41	41	138
New.ReferenceOTU251	k__Bacteria; p__Verrucomicrobia; c__Verrucomicrobiae; o__Verrucomicrobiales; f__Verrucomicrobiaceae; g__Akkermansia; s__muciniphila	0.031746	0.371746	2	6	2	5	5	5	11	16	7	17	11	5
New.ReferenceOTU45	k__Bacteria; p__Firmicutes; c__Clostridia; o__Clostridiales; f__; g__; s__	0.031746	0.371746	40	2	6	18	4	69	9	121	63	65	65	6
New.ReferenceOTU81	k__Bacteria; p__Firmicutes; c__Clostridia; o__Clostridiales; f__Ruminococcaceae; g__; s__	0.031746	0.371746	12	0	1	3	0	19	6	21	7	18	18	1
182176	k__Bacteria; p__Verrucomicrobia; c__Verrucomicrobiae; o__Verrucomicrobiales; f__Verrucomicrobiaceae; g__Akkermansia; s__muciniphila	0.0396825	0.371746	1	0	1	1	1	2	1	3	2	5	2	1
207252	k__Bacteria; p__Firmicutes; c__Clostridia; o__Clostridiales; f__Ruminococcaceae; g__Oscillospira; s__	0.0396825	0.371746	0	1	0	4	0	3	8	9	4	3	4	0
265036	k__Bacteria; p__Firmicutes; c__Clostridia; o__Clostridiales; f__Ruminococcaceae; g__; s__	0.0396825	0.371746	2	5	0	1	1	6	2	6	4	7	6	1
340650	k__Bacteria; p__Firmicutes; c__Clostridia; o__Clostridiales; f__; g__; s__	0.0396825	0.371746	1	3	2	0	5	7	6	9	2	10	7	2
38415	k__Bacteria; p__Firmicutes; c__Clostridia; o__Clostridiales; f__Lachnospiraceae; g__Dorea; s__	0.0396825	0.371746	6	18	16	9	10	2	5	6	7	7	6	10
4393892	k__Bacteria; p__Firmicutes; c__Clostridia; o__Clostridiales; f__; g__; s__	0.0396825	0.371746	5	1	0	0	0	6	4	9	2	2	4	0
New.CleanUp.ReferenceOTU11054	k__Bacteria; p__Firmicutes; c__Clostridia; o__Clostridiales; f__Ruminococcaceae; g__; s__	0.0396825	0.371746	1	0	1	4	1	7	1	10	9	5	7	1
New.CleanUp.ReferenceOTU13664	k__Bacteria; p__Firmicutes; c__Clostridia; o__Clostridiales; f__Ruminococcaceae; g__; s__	0.0396825	0.371746	0	0	0	2	0	2	1	1	3	2	2	0
New.CleanUp.ReferenceOTU14357	k__Bacteria; p__Firmicutes; c__Clostridia; o__Clostridiales; f__Lachnospiraceae; g__; s__	0.0396825	0.371746	2	0	1	4	0	4	4	11	3	4	4	1
New.CleanUp.ReferenceOTU40071	k__Bacteria; p__Firmicutes; c__Clostridia; o__Clostridiales; f__Ruminococcaceae; g__Oscillospira; s__	0.0396825	0.371746	0	3	0	0	0	1	1	1	4	2	1	0
New.CleanUp.ReferenceOTU50465	k__Bacteria; p__Firmicutes; c__Clostridia; o__Clostridiales; f__Ruminococcaceae; g__Oscillospira; s__	0.0396825	0.371746	1	3	1	1	1	0	0	0	0	1	0	1
New.CleanUp.ReferenceOTU57922	Unassigned	0.0396825	0.371746	0	0	0	2	0	2	1	6	1	2	2	0
New.ReferenceOTU120	k__Bacteria; p__Bacteroidetes; c__Bacteroidia; o__Bacteroidales; f__S24-7; g__; s__	0.0396825	0.371746	17	17	3	4	15	7	2	3	1	1	2	15
New.ReferenceOTU55	k__Bacteria; p__Firmicutes; c__Clostridia; o__Clostridiales; f__Clostridiaceae; g__; s__	0.0396825	0.371746	2	3	0	0	0	13	1	3	13	4	4	0
1105016	k__Bacteria; p__Firmicutes; c__Clostridia; o__Clostridiales; f__Ruminococcaceae; g__; s__	0.047619	0.371746	0	1	1	2	2	0	0	0	0	0	0	1
1106683	k__Bacteria; p__Firmicutes; c__Clostridia; o__Clostridiales; f__; g__; s__	0.047619	0.371746	1	2	0	1	1	0	0	0	0	0	0	1
166869	k__Bacteria; p__Firmicutes; c__Clostridia; o__Clostridiales; f__; g__; s__	0.047619	0.371746	0	0	0	0	0	15	0	15	4	15	15	0
174184	k__Bacteria; p__Firmicutes; c__Clostridia; o__Clostridiales; f__Lachnospiraceae; g__; s__	0.047619	0.371746	7	2	0	2	1	0	0	0	0	0	0	2
174353	k__Bacteria; p__Firmicutes; c__Clostridia; o__Clostridiales; f__; g__; s__	0.047619	0.371746	0	3	14	1	5	0	0	0	0	0	0	3
174651	k__Bacteria; p__Firmicutes; c__Clostridia; o__Clostridiales; f__Ruminococcaceae; g__; s__	0.047619	0.371746	1	0	1	9	3	0	0	0	0	0	0	1
175078	k__Bacteria; p__Firmicutes; c__Clostridia; o__Clostridiales; f__; g__; s__	0.047619	0.371746	16	15	3	2	0	0	0	0	0	0	0	3
180235	k__Bacteria; p__Firmicutes; c__Clostridia; o__Clostridiales; f__Ruminococcaceae; g__Oscillospira; s__	0.047619	0.371746	0	1	0	0	0	233	189	0	242	221	221	0
181707	k__Bacteria; p__Firmicutes; c__Clostridia; o__Clostridiales; f__Lachnospiraceae; g__[Ruminococcus]; s__gnavus	0.047619	0.371746	0	0	0	0	0	1	1	1	0	1	1	0
183849	k__Bacteria; p__Firmicutes; c__Clostridia; o__Clostridiales; f__Lachnospiraceae; g__Blautia; s__producta	0.047619	0.371746	1	0	2	7	7	0	0	0	0	0	0	2
184211	k__Bacteria; p__Firmicutes; c__Clostridia; o__Clostridiales; f__; g__; s__	0.047619	0.371746	1	2	5	5	0	0	0	0	0	0	0	2
186332	k__Bacteria; p__Firmicutes; c__Clostridia; o__Clostridiales; f__Lachnospiraceae; g__[Ruminococcus]; s__gnavus	0.047619	0.371746	0	0	0	0	0	0	1	1	2	4	1	0
186777	k__Bacteria; p__Firmicutes; c__Clostridia; o__Clostridiales; f__Lachnospiraceae; g__; s__	0.047619	0.371746	0	1	7	3	3	0	0	0	0	0	0	3
190420	k__Bacteria; p__Firmicutes; c__Clostridia; o__Clostridiales; f__Ruminococcaceae; g__; s__	0.047619	0.371746	0	1	5	7	7	0	0	0	0	0	0	5
2119418	k__Bacteria; p__Proteobacteria; c__Gammaproteobacteria; o__Enterobacteriales; f__Enterobacteriaceae; g__Pantoea; s__agglomerans	0.047619	0.371746	1	33	8	8	6	1	1	0	2	3	1	8
214471	k__Bacteria; p__Firmicutes; c__Clostridia; o__Clostridiales; f__; g__; s__	0.047619	0.371746	0	0	0	0	0	45	26	0	24	29	26	0
215018	k__Bacteria; p__Firmicutes; c__Clostridia; o__Clostridiales; f__Lachnospiraceae; g__; s__	0.047619	0.371746	0	0	0	0	0	2	1	0	1	2	1	0
228785	k__Bacteria; p__Firmicutes; c__Clostridia; o__Clostridiales; f__Dehalobacteriaceae; g__Dehalobacterium; s__	0.047619	0.371746	0	0	0	0	0	13	0	10	33	23	13	0
234912	k__Bacteria; p__Firmicutes; c__Clostridia; o__Clostridiales; f__Clostridiaceae; g__Clostridium; s__	0.047619	0.371746	0	18	3	3	11	0	0	0	0	0	0	3
259154	k__Bacteria; p__Firmicutes; c__Clostridia; o__Clostridiales; f__Lachnospiraceae; g__; s__	0.047619	0.371746	3	0	1	1	1	0	0	0	0	0	0	1
261114	k__Bacteria; p__Firmicutes; c__Clostridia; o__Clostridiales; f__Lachnospiraceae; g__; s__	0.047619	0.371746	5	6	0	13	1	0	0	0	0	0	0	5
262159	k__Bacteria; p__Firmicutes; c__Clostridia; o__Clostridiales; f__; g__; s__	0.047619	0.371746	1	0	5	2	2	0	0	0	0	0	0	2
262917	k__Bacteria; p__Firmicutes; c__Clostridia; o__Clostridiales; f__; g__; s__	0.047619	0.371746	0	144	91	38	19	0	0	0	0	0	0	38
263366	k__Bacteria; p__Firmicutes; c__Clostridia; o__Clostridiales; f__; g__; s__	0.047619	0.371746	5	2	0	3	9	0	0	0	0	0	0	3
263402	k__Bacteria; p__Firmicutes; c__Clostridia; o__Clostridiales; f__; g__; s__	0.047619	0.371746	0	0	0	0	0	4	1	4	1	0	1	0
263957	k__Bacteria; p__Firmicutes; c__Clostridia; o__Clostridiales; f__Clostridiaceae; g__; s__	0.047619	0.371746	4	0	3	3	0	5	1	8	7	18	7	3
265706	k__Bacteria; p__Firmicutes; c__Clostridia; o__Clostridiales; f__; g__; s__	0.047619	0.371746	0	0	0	0	0	3	2	3	0	2	2	0
271439	k__Bacteria; p__Firmicutes; c__Clostridia; o__Clostridiales; f__; g__; s__	0.047619	0.371746	1	1	1	4	0	0	0	0	0	0	0	1
271494	k__Bacteria; p__Firmicutes; c__Clostridia; o__Clostridiales; f__; g__; s__	0.047619	0.371746	39	6	1	1	0	0	0	0	0	0	0	1
271804	k__Bacteria; p__Firmicutes; c__Clostridia; o__Clostridiales; f__Lachnospiraceae; g__; s__	0.047619	0.371746	0	0	0	0	0	9	0	1	1	1	1	0
275366	k__Bacteria; p__Firmicutes; c__Clostridia; o__Clostridiales; f__; g__; s__	0.047619	0.371746	0	6	2	5	1	0	0	0	0	0	0	2
2979308	k__Bacteria; p__Firmicutes; c__Clostridia; o__Clostridiales; f__Ruminococcaceae; g__Ruminococcus; s__	0.047619	0.371746	0	5	5	7	6	0	0	0	0	0	0	5
303414	k__Bacteria; p__Firmicutes; c__Clostridia; o__Clostridiales; f__; g__; s__	0.047619	0.371746	3	6	0	2	1	0	0	0	0	0	0	2
307608	k__Bacteria; p__Firmicutes; c__Clostridia; o__Clostridiales; f__Ruminococcaceae; g__Oscillospira; s__	0.047619	0.371746	0	0	0	0	0	10	15	0	17	1	10	0
308546	k__Bacteria; p__Firmicutes; c__Clostridia; o__Clostridiales; f__; g__; s__	0.047619	0.371746	0	0	0	0	0	1	0	1	2	1	1	0
330460	k__Bacteria; p__Firmicutes; c__Clostridia; o__Clostridiales; f__; g__; s__	0.047619	0.371746	0	2	0	0	0	3	7	6	3	0	3	0
337784	k__Bacteria; p__Firmicutes; c__Clostridia; o__Clostridiales; f__[Mogibacteriaceae]; g__; s__	0.047619	0.371746	0	3	4	3	3	0	0	0	0	0	0	3
3694603	k__Bacteria; p__Firmicutes; c__Clostridia; o__Clostridiales; f__Lachnospiraceae; g__; s__	0.047619	0.371746	1	0	0	0	0	2	3	6	0	9	3	0
4357315	k__Bacteria; p__Firmicutes; c__Clostridia; o__Clostridiales; f__Ruminococcaceae; g__Oscillospira; s__	0.047619	0.371746	2	251	22	42	0	0	0	0	0	0	0	22
4364237	k__Bacteria; p__Firmicutes; c__Clostridia; o__Clostridiales; f__Ruminococcaceae; g__Oscillospira; s__	0.047619	0.371746	0	0	0	0	0	3	5	0	7	7	5	0
4420206	k__Bacteria; p__Firmicutes; c__Clostridia; o__Clostridiales; f__Ruminococcaceae; g__Oscillospira; s__	0.047619	0.371746	0	0	0	0	0	7	0	12	6	14	7	0
4435934	k__Bacteria; p__Firmicutes; c__Clostridia; o__Clostridiales; f__; g__; s__	0.047619	0.371746	0	0	0	0	0	7	0	11	4	4	4	0
4481359	k__Bacteria; p__Firmicutes; c__Clostridia; o__Clostridiales; f__Lachnospiraceae; g__; s__	0.047619	0.371746	0	0	0	0	0	78	0	8	3	29	8	0
830014	k__Bacteria; p__Firmicutes; c__Clostridia; o__Clostridiales; f__; g__; s__	0.047619	0.371746	2	4	1	5	0	0	0	0	0	0	0	2
New.CleanUp.ReferenceOTU10727	k__Bacteria; p__Firmicutes; c__Clostridia; o__Clostridiales; f__Clostridiaceae	0.047619	0.371746	6	1	3	4	0	0	0	0	0	0	0	3
New.CleanUp.ReferenceOTU11188	k__Bacteria; p__Firmicutes; c__Clostridia; o__Clostridiales; f__Ruminococcaceae; g__; s__	0.047619	0.371746	0	0	0	0	0	1	0	1	2	2	1	0
New.CleanUp.ReferenceOTU11309	k__Bacteria; p__Firmicutes; c__Clostridia; o__Clostridiales; f__; g__; s__	0.047619	0.371746	0	0	0	0	0	9	1	0	5	2	2	0
New.CleanUp.ReferenceOTU12632	k__Bacteria; p__Firmicutes; c__Clostridia; o__Clostridiales; f__Clostridiaceae	0.047619	0.371746	1	11	8	2	0	0	0	0	0	0	0	2
New.CleanUp.ReferenceOTU13523	k__Bacteria; p__Firmicutes; c__Clostridia; o__Clostridiales; f__Clostridiaceae; g__; s__	0.047619	0.371746	1	1	0	1	1	0	0	0	0	0	0	1
New.CleanUp.ReferenceOTU1384	k__Bacteria; p__Firmicutes; c__Clostridia; o__Clostridiales; f__; g__; s__	0.047619	0.371746	0	1	4	1	3	0	0	0	0	0	0	1
New.CleanUp.ReferenceOTU15200	k__Bacteria; p__Firmicutes; c__Clostridia; o__Clostridiales; f__Lachnospiraceae; g__; s__	0.047619	0.371746	4	1	2	0	2	0	0	0	0	0	0	2
New.CleanUp.ReferenceOTU15814	k__Bacteria; p__Firmicutes; c__Clostridia; o__Clostridiales; f__Ruminococcaceae; g__Ruminococcus; s__	0.047619	0.371746	4	2	2	3	0	3	5	6	9	3	5	2
New.CleanUp.ReferenceOTU15860	k__Bacteria; p__Firmicutes; c__Clostridia; o__Clostridiales; f__; g__; s__	0.047619	0.371746	0	5	8	1	1	0	0	0	0	0	0	1
New.CleanUp.ReferenceOTU17258	k__Bacteria; p__Firmicutes; c__Clostridia; o__Clostridiales; f__Ruminococcaceae; g__; s__	0.047619	0.371746	0	0	0	0	0	5	0	4	4	3	4	0
New.CleanUp.ReferenceOTU17500	k__Bacteria; p__Firmicutes; c__Clostridia; o__Clostridiales; f__Ruminococcaceae; g__Oscillospira; s__	0.047619	0.371746	0	3	1	2	2	0	0	0	0	0	0	2
New.CleanUp.ReferenceOTU19067	k__Bacteria; p__Firmicutes; c__Clostridia; o__Clostridiales; f__Lachnospiraceae; g__; s__	0.047619	0.371746	0	0	0	0	0	3	3	2	0	9	3	0
New.CleanUp.ReferenceOTU20110	k__Bacteria; p__Firmicutes; c__Clostridia; o__Clostridiales; f__; g__; s__	0.047619	0.371746	0	0	0	0	0	3	0	7	20	7	7	0
New.CleanUp.ReferenceOTU20567	k__Bacteria; p__Bacteroidetes; c__Bacteroidia; o__Bacteroidales; f__S24-7; g__; s__	0.047619	0.371746	0	0	0	0	0	1	1	1	0	2	1	0
New.CleanUp.ReferenceOTU20636	k__Bacteria; p__Firmicutes; c__Clostridia; o__Clostridiales; f__; g__; s__	0.047619	0.371746	0	0	0	1	0	3	0	8	4	2	3	0
New.CleanUp.ReferenceOTU21443	k__Bacteria; p__Firmicutes; c__Clostridia; o__Clostridiales; f__; g__; s__	0.047619	0.371746	3	1	3	1	0	0	0	0	0	0	0	1
New.CleanUp.ReferenceOTU2204	k__Bacteria; p__Firmicutes; c__Bacilli; o__Lactobacillales; f__Lactobacillaceae; g__Lactobacillus; s__	0.047619	0.371746	0	0	0	1	0	0	5	5	3	9	5	0
New.CleanUp.ReferenceOTU22199	k__Bacteria; p__Firmicutes; c__Clostridia; o__Clostridiales; f__Lachnospiraceae; g__; s__	0.047619	0.371746	2	1	1	0	1	0	0	0	0	0	0	1
New.CleanUp.ReferenceOTU22497	k__Bacteria; p__Firmicutes; c__Clostridia; o__Clostridiales; f__Lachnospiraceae; g__; s__	0.047619	0.371746	2	1	2	2	0	0	0	0	0	0	0	2
New.CleanUp.ReferenceOTU22702	k__Bacteria; p__Firmicutes; c__Clostridia; o__Clostridiales; f__Ruminococcaceae; g__; s__	0.047619	0.371746	0	0	0	0	0	2	0	2	1	1	1	0
New.CleanUp.ReferenceOTU22816	k__Bacteria; p__Firmicutes; c__Bacilli; o__Lactobacillales; f__Lactobacillaceae; g__Lactobacillus; s__	0.047619	0.371746	0	0	0	0	0	0	1	1	5	2	1	0
New.CleanUp.ReferenceOTU23339	k__Bacteria; p__Firmicutes; c__Clostridia; o__Clostridiales; f__Lachnospiraceae; g__Coprococcus; s__	0.047619	0.371746	2	1	1	1	0	0	0	0	0	0	0	1
New.CleanUp.ReferenceOTU23518	k__Bacteria; p__Firmicutes; c__Clostridia; o__Clostridiales; f__; g__; s__	0.047619	0.371746	0	2	13	4	9	0	0	0	0	0	0	4
New.CleanUp.ReferenceOTU2504	k__Bacteria; p__Firmicutes; c__Clostridia; o__Clostridiales; f__; g__; s__	0.047619	0.371746	10	7	0	1	1	0	0	0	0	0	0	1
New.CleanUp.ReferenceOTU25248	k__Bacteria; p__Firmicutes; c__Clostridia; o__Clostridiales; f__Clostridiaceae; g__; s__	0.047619	0.371746	0	1	1	1	1	0	0	0	0	0	0	1
New.CleanUp.ReferenceOTU2590	k__Bacteria; p__Firmicutes; c__Clostridia; o__Clostridiales; f__; g__; s__	0.047619	0.371746	0	3	3	2	2	0	0	0	0	0	0	2
New.CleanUp.ReferenceOTU25964	k__Bacteria; p__Firmicutes; c__Clostridia; o__Clostridiales; f__; g__; s__	0.047619	0.371746	0	4	9	2	3	0	0	0	0	0	0	3
New.CleanUp.ReferenceOTU27209	k__Bacteria; p__Firmicutes; c__Clostridia; o__Clostridiales; f__Ruminococcaceae; g__; s__	0.047619	0.371746	0	0	0	0	0	2	0	3	2	1	2	0
New.CleanUp.ReferenceOTU27550	Unassigned	0.047619	0.371746	2	0	2	1	3	0	0	0	0	0	0	2
New.CleanUp.ReferenceOTU27802	k__Bacteria; p__Firmicutes; c__Clostridia; o__Clostridiales; f__Clostridiaceae; g__; s__	0.047619	0.371746	0	1	1	1	2	0	0	0	0	0	0	1
New.CleanUp.ReferenceOTU28048	k__Bacteria; p__Firmicutes; c__Clostridia; o__Clostridiales; f__Ruminococcaceae; g__Oscillospira; s__	0.047619	0.371746	0	0	0	0	0	2	4	1	0	2	2	0
New.CleanUp.ReferenceOTU28053	k__Bacteria; p__Firmicutes; c__Clostridia; o__Clostridiales; f__Lachnospiraceae; g__[Ruminococcus]; s__gnavus	0.047619	0.371746	0	0	0	0	0	5	0	7	3	1	3	0
New.CleanUp.ReferenceOTU28623	k__Bacteria; p__Firmicutes; c__Clostridia; o__Clostridiales; f__Ruminococcaceae	0.047619	0.371746	1	2	3	1	0	0	0	0	0	0	0	1
New.CleanUp.ReferenceOTU29333	k__Bacteria; p__Firmicutes; c__Clostridia; o__Clostridiales; f__; g__; s__	0.047619	0.371746	2	2	1	0	1	0	0	0	0	0	0	1
New.CleanUp.ReferenceOTU29524	k__Bacteria; p__Firmicutes; c__Clostridia; o__Clostridiales; f__Ruminococcaceae; g__Ruminococcus; s__	0.047619	0.371746	3	2	1	2	0	0	0	0	0	0	0	2
New.CleanUp.ReferenceOTU29689	k__Bacteria; p__Firmicutes; c__Clostridia; o__Clostridiales; f__Ruminococcaceae; g__; s__	0.047619	0.371746	0	0	0	0	0	0	2	3	1	4	2	0
New.CleanUp.ReferenceOTU29876	k__Bacteria; p__Firmicutes; c__Clostridia; o__Clostridiales; f__Ruminococcaceae; g__; s__	0.047619	0.371746	3	1	3	1	5	1	0	1	0	0	0	3
New.CleanUp.ReferenceOTU30139	k__Bacteria; p__Firmicutes; c__Clostridia; o__Clostridiales; f__Ruminococcaceae; g__; s__	0.047619	0.371746	2	0	0	1	0	5	1	5	3	1	3	0
New.CleanUp.ReferenceOTU30140	k__Bacteria; p__Firmicutes; c__Clostridia; o__Clostridiales; f__Clostridiaceae; g__; s__	0.047619	0.371746	2	0	2	1	1	0	0	0	0	0	0	1
New.CleanUp.ReferenceOTU30480	k__Bacteria; p__Firmicutes; c__Clostridia; o__Clostridiales; f__; g__; s__	0.047619	0.371746	0	0	0	0	0	1	1	0	1	2	1	0
New.CleanUp.ReferenceOTU3124	k__Bacteria; p__Firmicutes; c__Clostridia; o__Clostridiales; f__; g__; s__	0.047619	0.371746	0	0	0	0	0	1	2	8	0	1	1	0
New.CleanUp.ReferenceOTU32723	k__Bacteria; p__Firmicutes; c__Clostridia; o__Clostridiales; f__Ruminococcaceae; g__Oscillospira; s__	0.047619	0.371746	2	1	1	2	0	0	0	0	0	0	0	1
New.CleanUp.ReferenceOTU33759	k__Bacteria; p__Firmicutes; c__Clostridia; o__Clostridiales; f__; g__; s__	0.047619	0.371746	0	0	0	0	0	2	1	6	0	1	1	0
New.CleanUp.ReferenceOTU34679	k__Bacteria; p__Firmicutes; c__Clostridia; o__Clostridiales; f__Clostridiaceae; g__Clostridium; s__	0.047619	0.371746	0	1	2	1	2	0	0	0	0	0	0	1
New.CleanUp.ReferenceOTU34758	k__Bacteria; p__Firmicutes; c__Clostridia; o__Clostridiales; f__; g__; s__	0.047619	0.371746	0	4	1	6	1	0	0	0	0	0	0	1
New.CleanUp.ReferenceOTU348	k__Bacteria; p__Firmicutes; c__Clostridia; o__Clostridiales; f__; g__; s__	0.047619	0.371746	0	0	0	0	0	2	0	1	2	1	1	0
New.CleanUp.ReferenceOTU35167	k__Bacteria; p__Firmicutes; c__Clostridia; o__Clostridiales; f__Ruminococcaceae; g__; s__	0.047619	0.371746	0	0	0	0	0	2	1	1	1	0	1	0
New.CleanUp.ReferenceOTU3559	k__Bacteria; p__Firmicutes; c__Clostridia; o__Clostridiales; f__Ruminococcaceae; g__Oscillospira; s__	0.047619	0.371746	4	3	1	0	1	0	0	0	0	0	0	1
New.CleanUp.ReferenceOTU35934	k__Bacteria; p__Firmicutes; c__Clostridia; o__Clostridiales; f__Clostridiaceae; g__; s__	0.047619	0.371746	1	1	2	1	0	0	0	0	0	0	0	1
New.CleanUp.ReferenceOTU36430	k__Bacteria; p__Bacteroidetes; c__Bacteroidia; o__Bacteroidales; f__S24-7; g__; s__	0.047619	0.371746	1	1	2	0	3	0	0	0	0	0	0	1
New.CleanUp.ReferenceOTU38762	k__Bacteria; p__Firmicutes; c__Clostridia; o__Clostridiales; f__; g__; s__	0.047619	0.371746	0	0	0	0	0	3	1	2	0	1	1	0
New.CleanUp.ReferenceOTU38925	k__Bacteria; p__Firmicutes; c__Clostridia; o__Clostridiales; f__Ruminococcaceae; g__Oscillospira; s__	0.047619	0.371746	0	0	0	0	0	1	0	2	2	2	2	0
New.CleanUp.ReferenceOTU39206	k__Bacteria; p__Bacteroidetes; c__Bacteroidia; o__Bacteroidales; f__S24-7; g__; s__	0.047619	0.371746	1	3	1	0	7	0	0	0	0	0	0	1
New.CleanUp.ReferenceOTU4004	Unassigned	0.047619	0.371746	0	0	0	0	0	1	1	0	1	1	1	0
New.CleanUp.ReferenceOTU40316	k__Bacteria; p__Firmicutes; c__Clostridia; o__Clostridiales; f__; g__; s__	0.047619	0.371746	0	1	1	3	2	0	0	0	0	0	0	1
New.CleanUp.ReferenceOTU4066	k__Bacteria; p__Firmicutes; c__Clostridia; o__Clostridiales; f__; g__; s__	0.047619	0.371746	0	0	0	0	0	6	0	5	3	1	3	0
New.CleanUp.ReferenceOTU40681	k__Bacteria; p__Firmicutes; c__Clostridia; o__Clostridiales; f__Lachnospiraceae; g__; s__	0.047619	0.371746	0	0	0	0	0	0	1	1	1	1	1	0
New.CleanUp.ReferenceOTU40690	k__Bacteria; p__Firmicutes; c__Clostridia; o__Clostridiales; f__Clostridiaceae	0.047619	0.371746	13	14	21	0	7	0	0	0	0	0	0	13
New.CleanUp.ReferenceOTU4541	k__Bacteria; p__Firmicutes; c__Clostridia; o__Clostridiales; f__; g__; s__	0.047619	0.371746	1	0	0	1	0	8	1	12	1	4	4	0
New.CleanUp.ReferenceOTU46048	k__Bacteria; p__Firmicutes; c__Clostridia; o__Clostridiales; f__Dehalobacteriaceae; g__Dehalobacterium; s__	0.047619	0.371746	0	0	0	0	0	1	0	1	1	1	1	0
New.CleanUp.ReferenceOTU46587	k__Bacteria; p__Firmicutes; c__Clostridia; o__Clostridiales; f__Clostridiaceae; g__; s__	0.047619	0.371746	0	1	1	1	1	0	0	0	0	0	0	1
New.CleanUp.ReferenceOTU46971	k__Bacteria; p__Firmicutes; c__Clostridia; o__Clostridiales; f__; g__; s__	0.047619	0.371746	0	1	1	4	2	0	0	0	0	0	0	1
New.CleanUp.ReferenceOTU48075	k__Bacteria; p__Firmicutes; c__Clostridia; o__Clostridiales; f__; g__; s__	0.047619	0.371746	0	0	0	0	0	8	3	0	6	5	5	0
New.CleanUp.ReferenceOTU4818	k__Bacteria; p__Firmicutes; c__Clostridia; o__Clostridiales; f__; g__; s__	0.047619	0.371746	0	0	0	0	0	18	0	5	2	7	5	0
New.CleanUp.ReferenceOTU48620	k__Bacteria; p__Firmicutes; c__Clostridia; o__Clostridiales; f__; g__; s__	0.047619	0.371746	1	4	1	1	0	0	0	0	0	0	0	1
New.CleanUp.ReferenceOTU49050	k__Bacteria; p__Firmicutes; c__Clostridia; o__Clostridiales; f__; g__; s__	0.047619	0.371746	0	8	7	5	5	0	0	0	0	0	0	5
New.CleanUp.ReferenceOTU5014	k__Bacteria; p__Firmicutes; c__Clostridia; o__Clostridiales; f__; g__; s__	0.047619	0.371746	0	0	0	0	0	5	0	2	6	1	2	0
New.CleanUp.ReferenceOTU53136	k__Bacteria; p__Firmicutes; c__Clostridia; o__Clostridiales; f__; g__; s__	0.047619	0.371746	0	0	0	0	0	5	2	6	0	3	3	0
New.CleanUp.ReferenceOTU53919	k__Bacteria; p__Firmicutes; c__Clostridia; o__Clostridiales; f__Ruminococcaceae; g__; s__	0.047619	0.371746	0	0	0	0	0	1	3	1	0	1	1	0
New.CleanUp.ReferenceOTU54982	k__Bacteria; p__Firmicutes; c__Clostridia; o__Clostridiales; f__; g__; s__	0.047619	0.371746	0	0	0	0	0	2	2	1	2	0	2	0
New.CleanUp.ReferenceOTU55111	k__Bacteria; p__Firmicutes; c__Clostridia; o__Clostridiales; f__Ruminococcaceae; g__; s__	0.047619	0.371746	0	1	3	2	1	0	0	0	0	0	0	1
New.CleanUp.ReferenceOTU55329	k__Bacteria; p__Firmicutes; c__Clostridia; o__Clostridiales; f__; g__; s__	0.047619	0.371746	0	0	0	0	0	3	4	2	0	1	2	0
New.CleanUp.ReferenceOTU55336	k__Bacteria; p__Firmicutes; c__Clostridia; o__Clostridiales; f__; g__; s__	0.047619	0.371746	1	2	1	4	0	0	0	0	0	0	0	1
New.CleanUp.ReferenceOTU55593	k__Bacteria; p__Firmicutes; c__Clostridia; o__Clostridiales; f__; g__; s__	0.047619	0.371746	0	2	13	5	1	0	0	0	0	0	0	2
New.CleanUp.ReferenceOTU55708	k__Bacteria; p__Firmicutes; c__Clostridia; o__Clostridiales; f__Lachnospiraceae; g__[Ruminococcus]; s__gnavus	0.047619	0.371746	0	0	0	0	0	0	1	1	1	1	1	0
New.CleanUp.ReferenceOTU55841	k__Bacteria; p__Firmicutes; c__Clostridia; o__Clostridiales; f__; g__; s__	0.047619	0.371746	0	2	1	0	0	5	5	3	1	1	3	0
New.CleanUp.ReferenceOTU56604	k__Bacteria; p__Firmicutes; c__Clostridia; o__Clostridiales; f__; g__; s__	0.047619	0.371746	3	0	7	1	2	0	0	0	0	0	0	2
New.CleanUp.ReferenceOTU58828	k__Bacteria; p__Firmicutes; c__Clostridia; o__Clostridiales; f__; g__; s__	0.047619	0.371746	20	5	34	0	3	0	0	0	0	0	0	5
New.CleanUp.ReferenceOTU59287	k__Bacteria; p__Firmicutes; c__Clostridia; o__Clostridiales; f__; g__; s__	0.047619	0.371746	29	40	3	0	2	0	0	0	0	1	0	3
New.CleanUp.ReferenceOTU59499	k__Bacteria; p__Firmicutes; c__Clostridia; o__Clostridiales; f__; g__; s__	0.047619	0.371746	1	2	2	0	1	0	0	0	0	0	0	1
New.CleanUp.ReferenceOTU59731	k__Bacteria; p__Firmicutes; c__Clostridia; o__Clostridiales; f__; g__; s__	0.047619	0.371746	0	0	0	0	0	2	1	6	1	0	1	0
New.CleanUp.ReferenceOTU61342	k__Bacteria; p__Firmicutes; c__Clostridia; o__Clostridiales; f__Lachnospiraceae; g__; s__	0.047619	0.371746	0	0	0	0	0	2	4	1	0	5	2	0
New.CleanUp.ReferenceOTU6142	k__Bacteria; p__Firmicutes; c__Clostridia; o__Clostridiales; f__Ruminococcaceae; g__; s__	0.047619	0.371746	0	0	0	0	0	1	0	2	2	2	2	0
New.CleanUp.ReferenceOTU61696	k__Bacteria; p__Firmicutes; c__Clostridia; o__Clostridiales; f__; g__; s__	0.047619	0.371746	0	4	1	7	2	0	0	0	0	0	0	2
New.CleanUp.ReferenceOTU61903	k__Bacteria; p__Firmicutes; c__Clostridia; o__Clostridiales; f__Lachnospiraceae; g__; s__	0.047619	0.371746	0	0	0	0	0	1	0	4	1	1	1	0
New.CleanUp.ReferenceOTU63172	k__Bacteria; p__Bacteroidetes; c__Bacteroidia; o__Bacteroidales; f__Porphyromonadaceae; g__Parabacteroides; s__	0.047619	0.371746	5	4	4	0	3	0	0	0	0	0	0	4
New.CleanUp.ReferenceOTU63675	k__Bacteria; p__Firmicutes; c__Clostridia; o__Clostridiales; f__; g__; s__	0.047619	0.371746	1	1	4	1	0	0	0	0	0	0	0	1
New.CleanUp.ReferenceOTU65387	k__Bacteria; p__Firmicutes; c__Clostridia; o__Clostridiales; f__; g__; s__	0.047619	0.371746	13	3	7	0	2	0	0	0	0	0	0	3
New.CleanUp.ReferenceOTU65446	k__Bacteria; p__Firmicutes; c__Clostridia; o__Clostridiales; f__Clostridiaceae; g__; s__	0.047619	0.371746	5	0	2	1	2	0	0	0	0	0	0	2
New.CleanUp.ReferenceOTU66515	k__Bacteria; p__Firmicutes; c__Clostridia; o__Clostridiales; f__Ruminococcaceae; g__Oscillospira; s__	0.047619	0.371746	0	0	0	0	0	0	2	3	3	2	2	0
New.CleanUp.ReferenceOTU67308	k__Bacteria; p__Firmicutes; c__Clostridia; o__Clostridiales; f__; g__; s__	0.047619	0.371746	0	0	0	0	0	1	1	2	0	1	1	0
New.CleanUp.ReferenceOTU69066	k__Bacteria; p__Bacteroidetes; c__Bacteroidia; o__Bacteroidales; f__Porphyromonadaceae; g__Parabacteroides; s__	0.047619	0.371746	3	2	2	3	0	3	7	4	4	3	4	2
New.CleanUp.ReferenceOTU69923	k__Bacteria; p__Firmicutes; c__Clostridia; o__Clostridiales; f__; g__; s__	0.047619	0.371746	0	0	0	0	0	1	2	2	2	0	2	0
New.CleanUp.ReferenceOTU70163	k__Bacteria; p__Firmicutes; c__Clostridia; o__Clostridiales; f__; g__; s__	0.047619	0.371746	1	0	3	3	2	0	0	0	0	0	0	2
New.CleanUp.ReferenceOTU70194	k__Bacteria; p__Firmicutes; c__Clostridia; o__Clostridiales; f__Lachnospiraceae; g__Coprococcus; s__	0.047619	0.371746	0	0	0	0	0	1	0	3	2	2	2	0
New.CleanUp.ReferenceOTU70284	k__Bacteria; p__Firmicutes; c__Clostridia; o__Clostridiales; f__; g__; s__	0.047619	0.371746	0	0	0	0	0	1	1	1	0	1	1	0
New.CleanUp.ReferenceOTU70625	k__Bacteria; p__Firmicutes; c__Clostridia; o__Clostridiales; f__Ruminococcaceae; g__; s__	0.047619	0.371746	0	0	0	0	0	1	0	2	5	1	1	0
New.CleanUp.ReferenceOTU71014	k__Bacteria; p__Firmicutes; c__Clostridia; o__Clostridiales; f__Ruminococcaceae	0.047619	0.371746	2	3	3	0	3	0	0	0	0	0	0	3
New.CleanUp.ReferenceOTU71486	k__Bacteria; p__Firmicutes; c__Clostridia; o__Clostridiales; f__Ruminococcaceae; g__Oscillospira; s__	0.047619	0.371746	0	0	0	0	0	1	2	3	5	0	2	0
New.CleanUp.ReferenceOTU71696	k__Bacteria; p__Firmicutes; c__Clostridia; o__Clostridiales; f__Lachnospiraceae; g__[Ruminococcus]; s__gnavus	0.047619	0.371746	0	0	0	0	0	1	0	3	1	1	1	0
New.CleanUp.ReferenceOTU71814	k__Bacteria; p__Firmicutes; c__Clostridia; o__Clostridiales; f__Lachnospiraceae; g__; s__	0.047619	0.371746	0	0	0	0	0	0	1	1	2	1	1	0
New.CleanUp.ReferenceOTU72133	k__Bacteria; p__Firmicutes; c__Clostridia; o__Clostridiales; f__; g__; s__	0.047619	0.371746	0	0	0	0	0	1	0	1	1	1	1	0
New.CleanUp.ReferenceOTU72636	Unassigned	0.047619	0.371746	0	0	3	0	0	2	1	1	1	1	1	0
New.CleanUp.ReferenceOTU73305	k__Bacteria; p__Bacteroidetes; c__Bacteroidia; o__Bacteroidales; f__S24-7; g__; s__	0.047619	0.371746	1	1	1	0	2	0	0	0	0	0	0	1
New.CleanUp.ReferenceOTU73341	k__Bacteria; p__Firmicutes; c__Clostridia; o__Clostridiales; f__; g__; s__	0.047619	0.371746	21	6	2	0	3	0	0	0	0	0	0	3
New.CleanUp.ReferenceOTU73489	k__Bacteria; p__Bacteroidetes; c__Bacteroidia; o__Bacteroidales; f__S24-7; g__; s__	0.047619	0.371746	1	5	0	2	2	0	0	0	0	0	0	2
New.CleanUp.ReferenceOTU74020	k__Bacteria; p__Firmicutes; c__Clostridia; o__Clostridiales; f__Clostridiaceae; g__; s__	0.047619	0.371746	1	2	1	0	3	0	0	0	0	0	0	1
New.CleanUp.ReferenceOTU74590	k__Bacteria; p__Firmicutes; c__Clostridia; o__Clostridiales; f__Lachnospiraceae; g__; s__	0.047619	0.371746	0	0	0	0	0	1	1	4	0	1	1	0
New.CleanUp.ReferenceOTU74723	k__Bacteria; p__Firmicutes; c__Clostridia; o__Clostridiales; f__; g__; s__	0.047619	0.371746	1	1	1	0	1	0	0	0	0	0	0	1
New.CleanUp.ReferenceOTU74901	k__Bacteria; p__Firmicutes; c__Clostridia; o__Clostridiales; f__; g__; s__	0.047619	0.371746	0	0	0	0	0	3	3	4	0	2	3	0
New.CleanUp.ReferenceOTU75252	k__Bacteria; p__Firmicutes; c__Clostridia; o__Clostridiales; f__Lachnospiraceae	0.047619	0.371746	1	1	0	8	2	0	0	0	0	0	0	1
New.CleanUp.ReferenceOTU75391	k__Bacteria; p__Firmicutes; c__Clostridia; o__Clostridiales; f__Ruminococcaceae; g__Oscillospira; s__	0.047619	0.371746	0	0	0	0	0	1	0	1	2	1	1	0
New.CleanUp.ReferenceOTU76056	k__Bacteria; p__Firmicutes; c__Clostridia; o__Clostridiales; f__Ruminococcaceae; g__; s__	0.047619	0.371746	0	0	0	0	0	5	1	3	1	0	1	0
New.CleanUp.ReferenceOTU76067	k__Bacteria; p__Firmicutes; c__Clostridia; o__Clostridiales; f__Clostridiaceae; g__; s__	0.047619	0.371746	2	3	5	2	0	0	0	0	0	0	0	2
New.CleanUp.ReferenceOTU76761	k__Bacteria; p__Firmicutes; c__Clostridia; o__Clostridiales; f__; g__; s__	0.047619	0.371746	4	0	1	3	1	0	0	0	0	0	0	1
New.CleanUp.ReferenceOTU77816	k__Bacteria; p__Firmicutes; c__Clostridia; o__Clostridiales; f__Lachnospiraceae; g__; s__	0.047619	0.371746	0	0	0	0	0	2	2	3	0	2	2	0
New.CleanUp.ReferenceOTU77920	k__Bacteria; p__Firmicutes; c__Clostridia; o__Clostridiales; f__; g__; s__	0.047619	0.371746	0	0	0	0	0	2	2	5	0	1	2	0
New.CleanUp.ReferenceOTU78077	k__Bacteria; p__Bacteroidetes; c__Bacteroidia; o__Bacteroidales; f__S24-7; g__; s__	0.047619	0.371746	0	1	0	0	1	1	1	3	2	7	2	0
New.CleanUp.ReferenceOTU78166	k__Bacteria; p__Firmicutes; c__Clostridia; o__Clostridiales; f__Ruminococcaceae; g__Ruminococcus; s__	0.047619	0.371746	0	0	0	0	0	6	0	1	3	2	2	0
New.CleanUp.ReferenceOTU78974	k__Bacteria; p__Bacteroidetes; c__Bacteroidia; o__Bacteroidales; f__Porphyromonadaceae; g__Parabacteroides; s__	0.047619	0.371746	8	11	8	9	9	8	4	6	5	8	6	9
New.CleanUp.ReferenceOTU79058	k__Bacteria; p__Firmicutes; c__Clostridia; o__Clostridiales; f__Ruminococcaceae; g__Oscillospira; s__	0.047619	0.371746	0	0	0	0	0	0	1	5	1	1	1	0
New.CleanUp.ReferenceOTU79325	k__Bacteria; p__Firmicutes; c__Clostridia; o__Clostridiales; f__Lachnospiraceae; g__; s__	0.047619	0.371746	0	0	0	0	0	3	1	1	0	1	1	0
New.CleanUp.ReferenceOTU80240	k__Bacteria; p__Firmicutes; c__Clostridia; o__Clostridiales; f__; g__; s__	0.047619	0.371746	6	11	17	0	3	0	0	0	0	0	0	6
New.CleanUp.ReferenceOTU80430	k__Bacteria; p__Verrucomicrobia; c__Verrucomicrobiae; o__Verrucomicrobiales; f__Verrucomicrobiaceae; g__Akkermansia; s__muciniphila	0.047619	0.371746	3	0	12	3	7	0	0	0	0	0	0	3
New.CleanUp.ReferenceOTU80523	k__Bacteria; p__Firmicutes; c__Clostridia; o__Clostridiales; f__Ruminococcaceae; g__; s__	0.047619	0.371746	0	2	1	2	12	0	0	0	0	0	0	2
New.CleanUp.ReferenceOTU80799	k__Bacteria; p__Firmicutes; c__Clostridia; o__Clostridiales; f__Ruminococcaceae; g__Oscillospira; s__	0.047619	0.371746	0	0	0	0	0	25	8	16	0	19	16	0
New.CleanUp.ReferenceOTU81621	k__Bacteria; p__Firmicutes; c__Clostridia; o__Clostridiales; f__Clostridiaceae; g__; s__	0.047619	0.371746	3	0	4	5	1	0	0	0	0	0	0	3
New.CleanUp.ReferenceOTU82076	k__Bacteria; p__Firmicutes; c__Clostridia; o__Clostridiales; f__Lachnospiraceae; g__; s__	0.047619	0.371746	3	1	2	2	0	0	0	0	0	0	0	2
New.CleanUp.ReferenceOTU82542	k__Bacteria; p__Firmicutes; c__Clostridia; o__Clostridiales; f__Ruminococcaceae; g__; s__	0.047619	0.371746	0	0	0	0	0	5	2	2	0	1	2	0
New.CleanUp.ReferenceOTU83115	k__Bacteria; p__Firmicutes; c__Clostridia; o__Clostridiales; f__; g__; s__	0.047619	0.371746	0	0	0	0	0	6	8	0	3	7	6	0
New.CleanUp.ReferenceOTU83342	k__Bacteria; p__Firmicutes; c__Clostridia; o__Clostridiales; f__; g__; s__	0.047619	0.371746	9	1	2	0	4	0	0	0	0	0	0	2
New.CleanUp.ReferenceOTU83418	k__Bacteria; p__Firmicutes; c__Clostridia; o__Clostridiales; f__Clostridiaceae; g__; s__	0.047619	0.371746	1	1	2	1	0	0	0	0	0	0	0	1
New.CleanUp.ReferenceOTU83690	k__Bacteria; p__Firmicutes; c__Clostridia; o__Clostridiales; f__; g__; s__	0.047619	0.371746	0	0	0	0	0	0	1	2	1	1	1	0
New.CleanUp.ReferenceOTU84298	k__Bacteria; p__Firmicutes; c__Clostridia; o__Clostridiales; f__Clostridiaceae; g__; s__	0.047619	0.371746	2	4	3	0	4	0	0	0	0	0	0	3
New.CleanUp.ReferenceOTU85367	k__Bacteria; p__Firmicutes; c__Clostridia; o__Clostridiales; f__Ruminococcaceae; g__Oscillospira; s__	0.047619	0.371746	0	0	0	0	0	4	0	7	2	2	2	0
New.CleanUp.ReferenceOTU856	k__Bacteria; p__Firmicutes; c__Clostridia; o__Clostridiales; f__; g__; s__	0.047619	0.371746	0	0	0	0	0	0	2	5	2	1	2	0
New.CleanUp.ReferenceOTU8585	k__Bacteria; p__Firmicutes; c__Clostridia; o__Clostridiales; f__; g__; s__	0.047619	0.371746	1	3	1	0	1	0	0	0	0	0	0	1
New.CleanUp.ReferenceOTU9032	k__Bacteria; p__Firmicutes; c__Clostridia; o__Clostridiales; f__Clostridiaceae; g__; s__	0.047619	0.371746	4	1	7	0	3	0	0	0	0	0	0	3
New.CleanUp.ReferenceOTU9548	k__Bacteria; p__Firmicutes; c__Clostridia; o__Clostridiales; f__; g__; s__	0.047619	0.371746	2	1	1	0	2	0	0	0	0	0	0	1
New.ReferenceOTU114	k__Bacteria; p__Firmicutes; c__Clostridia; o__Clostridiales; f__; g__; s__	0.047619	0.371746	0	0	0	0	0	2	1	1	1	0	1	0
New.ReferenceOTU129	k__Bacteria; p__Firmicutes; c__Clostridia; o__Clostridiales; f__Clostridiaceae; g__; s__	0.047619	0.371746	1	2	7	2	0	0	0	0	0	0	0	2
New.ReferenceOTU174	k__Bacteria; p__Firmicutes; c__Clostridia; o__Clostridiales; f__; g__; s__	0.047619	0.371746	1	1	2	2	0	0	0	0	0	0	0	1
New.ReferenceOTU186	k__Bacteria; p__Firmicutes; c__Clostridia; o__Clostridiales; f__Ruminococcaceae	0.047619	0.371746	10	0	0	4	0	7	1	19	15	17	15	0
New.ReferenceOTU24	k__Bacteria; p__Deferribacteres; c__Deferribacteres; o__Deferribacterales; f__Deferribacteraceae; g__Mucispirillum; s__schaedleri	0.047619	0.371746	43	1	2	1	0	0	0	0	0	0	0	1
New.ReferenceOTU260	k__Bacteria; p__Firmicutes; c__Clostridia; o__Clostridiales; f__Ruminococcaceae; g__; s__	0.047619	0.371746	0	0	0	0	0	8	2	6	0	8	6	0
New.ReferenceOTU27	k__Bacteria; p__Firmicutes; c__Clostridia; o__Clostridiales; f__; g__; s__	0.047619	0.371746	0	11	19	1	4	0	0	0	0	0	0	4
New.ReferenceOTU275	k__Bacteria; p__Firmicutes; c__Clostridia; o__Clostridiales; f__; g__; s__	0.047619	0.371746	2	1	19	0	1	0	0	0	0	0	0	1
New.ReferenceOTU58	Unassigned	0.047619	0.371746	9	5	5	6	1	9	7	9	7	15	9	5
134065	k__Bacteria; p__Firmicutes; c__Clostridia; o__Clostridiales; f__Lachnospiraceae; g__; s__	0.0555556	0.419713	112	66	381	19	46	2253	1196	166	79	2800	1196	66
134762	k__Bacteria; p__Bacteroidetes; c__Bacteroidia; o__Bacteroidales; f__S24-7; g__; s__	0.0555556	0.419713	436	530	304	200	584	212	252	184	158	242	212	436
157772	k__Bacteria; p__Firmicutes; c__Clostridia; o__Clostridiales; f__Ruminococcaceae; g__Oscillospira; s__	0.0555556	0.419713	2	4	0	1	2	3	6	27	9	2	6	2
197139	k__Bacteria; p__Firmicutes; c__Clostridia; o__Clostridiales; f__; g__; s__	0.0555556	0.419713	0	1	0	2	1	5	2	1	3	4	3	1
261365	k__Bacteria; p__Firmicutes; c__Clostridia; o__Clostridiales; f__Ruminococcaceae; g__Ruminococcus; s__	0.0555556	0.419713	60	154	70	84	19	289	327	969	340	63	327	70
324985	k__Bacteria; p__Firmicutes; c__Clostridia; o__Clostridiales; f__Lachnospiraceae; g__Coprococcus; s__	0.0555556	0.419713	2	24	19	9	1	1	1	0	0	2	1	9
New.CleanUp.ReferenceOTU40998	k__Bacteria; p__Bacteroidetes; c__Bacteroidia; o__Bacteroidales; f__Porphyromonadaceae; g__Parabacteroides; s__	0.0555556	0.419713	3	5	5	6	17	1	3	5	2	1	2	5
New.CleanUp.ReferenceOTU48698	k__Bacteria; p__Firmicutes; c__Clostridia; o__Clostridiales; f__; g__; s__	0.0555556	0.419713	6	41	33	24	6	6	3	0	0	19	3	24
New.CleanUp.ReferenceOTU57498	k__Bacteria; p__Firmicutes; c__Clostridia; o__Clostridiales; f__; g__; s__	0.0555556	0.419713	9	7	1	2	6	0	3	2	0	0	0	6
New.CleanUp.ReferenceOTU73659	k__Bacteria; p__Firmicutes; c__Bacilli; o__Lactobacillales; f__Lactobacillaceae; g__Lactobacillus; s__	0.0555556	0.419713	0	2	1	3	1	5	1	10	7	10	7	1
New.CleanUp.ReferenceOTU74009	Unassigned	0.0555556	0.419713	20	5	11	11	5	16	11	27	28	33	27	11
New.ReferenceOTU128	k__Bacteria; p__Bacteroidetes; c__Bacteroidia; o__Bacteroidales; f__Porphyromonadaceae; g__Parabacteroides; s__	0.0555556	0.419713	95	67	79	79	48	110	102	125	79	90	102	79
New.ReferenceOTU151	k__Bacteria; p__Bacteroidetes; c__Bacteroidia; o__Bacteroidales; f__S24-7; g__; s__	0.0555556	0.419713	176	276	85	35	311	73	77	25	3	36	36	176
New.ReferenceOTU162	k__Bacteria; p__Firmicutes; c__Clostridia; o__Clostridiales; f__; g__; s__	0.0555556	0.419713	3	28	6	14	2	2	0	0	0	13	0	6
New.ReferenceOTU218	k__Bacteria; p__Firmicutes; c__Clostridia; o__Clostridiales; f__; g__; s__	0.0555556	0.419713	3	16	17	15	1	1	1	0	0	7	1	15
New.ReferenceOTU223	k__Bacteria; p__Firmicutes; c__Clostridia; o__Clostridiales; f__Ruminococcaceae; g__Oscillospira; s__	0.0555556	0.419713	0	0	0	2	1	1	3	4	2	2	2	0
New.ReferenceOTU246	k__Bacteria; p__Bacteroidetes; c__Bacteroidia; o__Bacteroidales; f__S24-7; g__; s__	0.0555556	0.419713	46	69	18	5	53	19	4	9	0	3	4	46
New.ReferenceOTU252	k__Bacteria; p__Bacteroidetes; c__Bacteroidia; o__Bacteroidales; f__Porphyromonadaceae; g__Parabacteroides; s__	0.0555556	0.419713	58	32	16	50	26	105	31	89	74	73	74	32
New.ReferenceOTU258	k__Bacteria; p__Bacteroidetes; c__Bacteroidia; o__Bacteroidales; f__S24-7; g__; s__	0.0555556	0.419713	42	72	18	12	46	13	21	1	0	7	7	42
New.ReferenceOTU44	k__Bacteria; p__Firmicutes; c__Clostridia; o__Clostridiales; f__Lachnospiraceae; g__; s__	0.0555556	0.419713	10	3	0	2	0	8	8	12	14	8	8	2
170926	k__Bacteria; p__Firmicutes; c__Clostridia; o__Clostridiales; f__Ruminococcaceae; g__; s__	0.0634921	0.472809	6	8	3	1	2	7	5	14	9	8	8	3
260666	k__Bacteria; p__Firmicutes; c__Clostridia; o__Clostridiales; f__Lachnospiraceae; g__; s__	0.0634921	0.472809	0	2	0	0	1	12	0	309	46	57	46	0
273364	k__Bacteria; p__Firmicutes; c__Clostridia; o__Clostridiales; f__; g__; s__	0.0634921	0.472809	38	30	15	49	23	9	2	33	15	13	13	30
4446120	k__Bacteria; p__Firmicutes; c__Clostridia; o__Clostridiales; f__Ruminococcaceae; g__Oscillospira; s__	0.0634921	0.472809	15	17	8	9	8	35	15	41	12	25	25	9
New.CleanUp.ReferenceOTU42317	k__Bacteria; p__Firmicutes; c__Clostridia; o__Clostridiales; f__; g__; s__	0.0634921	0.472809	0	0	1	1	0	5	0	16	5	10	5	0
New.CleanUp.ReferenceOTU59403	k__Bacteria; p__Bacteroidetes; c__Bacteroidia; o__Bacteroidales; f__S24-7; g__; s__	0.0634921	0.472809	2	2	1	1	1	1	5	4	3	3	3	1
New.CleanUp.ReferenceOTU62627	k__Bacteria; p__Firmicutes; c__Clostridia; o__Clostridiales; f__Ruminococcaceae; g__Oscillospira; s__	0.0634921	0.472809	0	2	0	0	1	4	3	10	0	3	3	0
New.CleanUp.ReferenceOTU64139	k__Bacteria; p__Firmicutes; c__Clostridia; o__Clostridiales; f__; g__; s__	0.0634921	0.472809	63	3	4	3	0	1	0	0	0	2	0	3
New.CleanUp.ReferenceOTU69022	k__Bacteria; p__Firmicutes; c__Clostridia; o__Clostridiales; f__Ruminococcaceae; g__; s__	0.0634921	0.472809	0	1	0	1	0	9	0	6	8	2	6	0
New.CleanUp.ReferenceOTU11045	k__Bacteria; p__Firmicutes; c__Clostridia; o__Clostridiales; f__Ruminococcaceae; g__; s__	0.0714286	0.528549	1	0	1	0	0	2	2	5	0	2	2	0
New.CleanUp.ReferenceOTU18320	k__Bacteria; p__Firmicutes; c__Clostridia; o__Clostridiales; f__; g__; s__	0.0714286	0.528549	1	1	13	1	1	7	6	20	12	13	12	1
New.CleanUp.ReferenceOTU58005	k__Bacteria; p__Bacteroidetes; c__Bacteroidia; o__Bacteroidales; f__Porphyromonadaceae; g__Parabacteroides; s__	0.0714286	0.528549	2	1	0	0	0	1	1	2	3	3	2	0
New.CleanUp.ReferenceOTU74478	k__Bacteria; p__Firmicutes; c__Clostridia; o__Clostridiales; f__; g__; s__	0.0714286	0.528549	0	0	1	1	1	3	6	0	2	3	3	1
270200	k__Bacteria; p__Firmicutes; c__Clostridia; o__Clostridiales; f__Clostridiaceae; g__; s__	0.0793651	0.571038	1	2	1	1	2	3	2	2	2	5	2	1
270396	k__Bacteria; p__Firmicutes; c__Clostridia; o__Clostridiales; f__; g__; s__	0.0793651	0.571038	0	1	1	1	0	245	1	9	1	12	9	1
356055	k__Bacteria; p__Firmicutes; c__Clostridia; o__Clostridiales; f__Ruminococcaceae; g__Oscillospira; s__	0.0793651	0.571038	1	0	0	1	2	1	5	6	1	4	4	1
New.CleanUp.ReferenceOTU11510	k__Bacteria; p__Firmicutes; c__Clostridia; o__Clostridiales; f__Ruminococcaceae; g__Oscillospira; s__	0.0793651	0.571038	5	4	12	3	7	11	10	15	8	8	10	5
New.CleanUp.ReferenceOTU16231	k__Bacteria; p__Firmicutes; c__Clostridia; o__Clostridiales; f__Lachnospiraceae	0.0793651	0.571038	1	3	2	15	6	0	0	1	5	1	1	3
New.CleanUp.ReferenceOTU23783	k__Bacteria; p__Firmicutes; c__Clostridia; o__Clostridiales; f__Ruminococcaceae; g__Oscillospira; s__	0.0793651	0.571038	0	1	0	2	1	4	1	17	5	1	4	1
New.CleanUp.ReferenceOTU28873	k__Bacteria; p__Firmicutes; c__Clostridia; o__Clostridiales; f__Lachnospiraceae; g__; s__	0.0793651	0.571038	2	1	0	1	0	7	1	19	5	1	5	1
New.CleanUp.ReferenceOTU32794	k__Bacteria; p__Firmicutes; c__Clostridia; o__Clostridiales; f__; g__; s__	0.0793651	0.571038	1	1	0	1	0	1	2	9	1	3	2	1
New.CleanUp.ReferenceOTU40966	k__Bacteria; p__Bacteroidetes; c__Bacteroidia; o__Bacteroidales; f__Porphyromonadaceae; g__Parabacteroides; s__	0.0793651	0.571038	2	7	1	2	5	1	0	2	0	1	1	2
New.CleanUp.ReferenceOTU41684	k__Bacteria; p__Bacteroidetes; c__Bacteroidia; o__Bacteroidales; f__Porphyromonadaceae; g__Parabacteroides; s__	0.0793651	0.571038	9	3	3	10	5	11	9	11	8	10	10	5
New.CleanUp.ReferenceOTU50850	k__Bacteria; p__Firmicutes; c__Clostridia; o__Clostridiales; f__; g__; s__	0.0793651	0.571038	1	0	0	1	0	1	1	2	3	1	1	0
New.CleanUp.ReferenceOTU53216	k__Bacteria; p__Firmicutes; c__Clostridia; o__Clostridiales; f__; g__; s__	0.0793651	0.571038	1	0	1	1	0	4	2	3	1	1	2	1
New.CleanUp.ReferenceOTU53410	k__Bacteria; p__Firmicutes; c__Clostridia; o__Clostridiales; f__Ruminococcaceae; g__Oscillospira; s__	0.0793651	0.571038	2	2	1	0	0	7	1	4	2	3	3	1
New.CleanUp.ReferenceOTU63862	k__Bacteria; p__Firmicutes; c__Clostridia; o__Clostridiales; f__Lachnospiraceae; g__; s__	0.0793651	0.571038	1	4	4	7	1	6	3	11	8	12	8	4
New.CleanUp.ReferenceOTU70230	k__Bacteria; p__Firmicutes; c__Clostridia; o__Clostridiales; f__; g__; s__	0.0793651	0.571038	9	8	9	7	1	45	5	38	21	25	25	8
New.CleanUp.ReferenceOTU78609	k__Bacteria; p__Firmicutes; c__Clostridia; o__Clostridiales; f__; g__; s__	0.0793651	0.571038	0	2	3	1	0	5	1	5	2	4	4	1
New.CleanUp.ReferenceOTU80542	k__Bacteria; p__Firmicutes; c__Clostridia; o__Clostridiales; f__Ruminococcaceae; g__Oscillospira; s__	0.0793651	0.571038	12	15	5	10	5	0	8	0	7	2	2	10
New.ReferenceOTU206	k__Bacteria; p__Firmicutes; c__Clostridia; o__Clostridiales; f__Ruminococcaceae; g__Oscillospira; s__	0.0793651	0.571038	4	0	0	6	0	5	4	11	6	5	5	0
199307	k__Bacteria; p__Firmicutes; c__Clostridia; o__Clostridiales; f__Ruminococcaceae; g__; s__	0.0873016	0.606707	0	1	0	0	0	3	1	3	2	0	2	0
258725	k__Bacteria; p__Firmicutes; c__Clostridia; o__Clostridiales; f__Ruminococcaceae; g__Oscillospira; s__	0.0873016	0.606707	1	102	7	11	0	0	0	0	1	0	0	7
261467	k__Bacteria; p__Firmicutes; c__Clostridia; o__Clostridiales; f__; g__; s__	0.0873016	0.606707	1	0	9	3	2	8	3	15	3	11	8	2
266223	k__Bacteria; p__Firmicutes; c__Clostridia; o__Clostridiales; f__Ruminococcaceae; g__; s__	0.0873016	0.606707	0	1	0	0	0	0	1	3	4	3	3	0
335401	k__Bacteria; p__Firmicutes; c__Clostridia; o__Clostridiales; f__; g__; s__	0.0873016	0.606707	1	1	0	3	0	16	0	10	7	12	10	1
New.CleanUp.ReferenceOTU14502	k__Bacteria; p__Bacteroidetes; c__Bacteroidia; o__Bacteroidales; f__S24-7; g__; s__	0.0873016	0.606707	0	1	3	2	5	1	0	0	0	0	0	2
New.CleanUp.ReferenceOTU1726	k__Bacteria; p__Firmicutes; c__Clostridia; o__Clostridiales; f__Ruminococcaceae; g__Ruminococcus; s__	0.0873016	0.606707	0	1	0	0	0	3	4	2	1	0	2	0
New.CleanUp.ReferenceOTU19283	k__Bacteria; p__Firmicutes; c__Clostridia; o__Clostridiales; f__Ruminococcaceae; g__; s__	0.0873016	0.606707	1	0	0	0	0	5	0	10	1	8	5	0
New.CleanUp.ReferenceOTU34850	k__Bacteria; p__Firmicutes; c__Clostridia; o__Clostridiales; f__Ruminococcaceae; g__; s__	0.0873016	0.606707	15	0	0	16	5	22	11	27	14	21	21	5
New.CleanUp.ReferenceOTU40249	k__Bacteria; p__Firmicutes; c__Clostridia; o__Clostridiales; f__; g__; s__	0.0873016	0.606707	0	1	0	0	0	3	3	4	0	1	3	0
New.CleanUp.ReferenceOTU41091	k__Bacteria; p__Firmicutes; c__Clostridia; o__Clostridiales; f__Lachnospiraceae; g__; s__	0.0873016	0.606707	0	0	2	0	0	5	4	2	0	9	4	0
New.CleanUp.ReferenceOTU5409	k__Bacteria; p__Firmicutes; c__Clostridia; o__Clostridiales; f__; g__; s__	0.0873016	0.606707	1	2	3	2	0	0	0	0	0	1	0	2
New.CleanUp.ReferenceOTU54991	k__Bacteria; p__Firmicutes; c__Clostridia; o__Clostridiales; f__Ruminococcaceae; g__; s__	0.0873016	0.606707	1	1	1	2	1	8	1	15	5	2	5	1
New.CleanUp.ReferenceOTU63160	k__Bacteria; p__Firmicutes; c__Clostridia; o__Clostridiales; f__; g__; s__	0.0873016	0.606707	0	0	0	0	1	2	1	2	0	2	2	0
New.CleanUp.ReferenceOTU66218	k__Bacteria; p__Firmicutes; c__Clostridia; o__Clostridiales; f__; g__; s__	0.0873016	0.606707	0	0	0	0	1	2	1	6	2	0	2	0
New.CleanUp.ReferenceOTU71508	k__Bacteria; p__Firmicutes; c__Clostridia; o__Clostridiales; f__; g__; s__	0.0873016	0.606707	0	1	0	0	0	0	3	2	1	3	2	0
New.CleanUp.ReferenceOTU74473	k__Bacteria; p__Firmicutes; c__Clostridia; o__Clostridiales; f__; g__; s__	0.0873016	0.606707	0	4	1	1	4	3	6	4	4	9	4	1
New.CleanUp.ReferenceOTU75474	k__Bacteria; p__Firmicutes; c__Clostridia; o__Clostridiales; f__Lachnospiraceae; g__Coprococcus; s__	0.0873016	0.606707	1	0	0	0	0	1	0	2	4	2	2	0
New.CleanUp.ReferenceOTU79421	k__Bacteria; p__Firmicutes; c__Clostridia; o__Clostridiales; f__Ruminococcaceae; g__Oscillospira; s__	0.0873016	0.606707	10	7	2	2	2	13	6	11	5	11	11	2
New.CleanUp.ReferenceOTU80495	k__Bacteria; p__Firmicutes; c__Clostridia; o__Clostridiales; f__; g__; s__	0.0873016	0.606707	0	0	0	0	1	0	1	3	3	2	2	0
New.CleanUp.ReferenceOTU83811	k__Bacteria; p__Bacteroidetes; c__Bacteroidia; o__Bacteroidales; f__S24-7; g__; s__	0.0873016	0.606707	3	1	3	0	5	0	0	0	0	2	0	3
New.CleanUp.ReferenceOTU9708	k__Bacteria; p__Firmicutes; c__Clostridia; o__Clostridiales; f__Dehalobacteriaceae; g__Dehalobacterium; s__	0.0873016	0.606707	3	0	2	2	1	0	1	0	0	0	0	2
New.ReferenceOTU160	k__Bacteria; p__Firmicutes; c__Clostridia; o__Clostridiales; f__Ruminococcaceae; g__Oscillospira; s__	0.0873016	0.606707	4	1	0	3	0	7	6	10	0	7	7	1
176118	k__Bacteria; p__Firmicutes; c__Clostridia; o__Clostridiales; f__Ruminococcaceae; g__Oscillospira; s__	0.0952381	0.648394	2381	3878	1537	1548	1660	4691	3348	7883	2372	3847	3847	1660
183446	k__Bacteria; p__Bacteroidetes; c__Bacteroidia; o__Bacteroidales; f__S24-7; g__; s__	0.0952381	0.648394	22025	31004	9358	8981	23992	10846	11009	3664	362	5202	5202	22025
263144	k__Bacteria; p__Firmicutes; c__Clostridia; o__Clostridiales; f__; g__; s__	0.0952381	0.648394	10	17	12	9	4	17	10	23	19	14	17	10
268492	k__Bacteria; p__Firmicutes; c__Clostridia; o__Clostridiales; f__; g__; s__	0.0952381	0.648394	11	101	25	14	7	10	2	0	1	15	2	14
324013	k__Bacteria; p__Bacteroidetes; c__Bacteroidia; o__Bacteroidales; f__S24-7; g__; s__	0.0952381	0.648394	701	1024	567	286	1067	393	457	355	241	423	393	701
New.CleanUp.ReferenceOTU34956	k__Bacteria; p__Firmicutes; c__Clostridia; o__Clostridiales; f__; g__; s__	0.0952381	0.648394	0	2	0	0	1	4	5	0	5	2	4	0
New.CleanUp.ReferenceOTU49680	k__Bacteria; p__Firmicutes; c__Clostridia; o__Clostridiales; f__; g__; s__	0.0952381	0.648394	1	0	6	2	0	2	4	4	7	4	4	1
New.CleanUp.ReferenceOTU73445	k__Bacteria; p__Bacteroidetes; c__Bacteroidia; o__Bacteroidales; f__Porphyromonadaceae; g__Parabacteroides; s__	0.0952381	0.648394	7	17	4	5	11	7	5	3	0	1	3	7
New.CleanUp.ReferenceOTU82451	k__Bacteria; p__Firmicutes; c__Clostridia; o__Clostridiales; f__; g__; s__	0.0952381	0.648394	0	0	1	1	1	2	0	5	19	9	5	1
New.ReferenceOTU123	k__Bacteria; p__Bacteroidetes; c__Bacteroidia; o__Bacteroidales; f__S24-7; g__; s__	0.0952381	0.648394	806	1039	878	458	1326	531	585	523	421	607	531	878
New.ReferenceOTU216	k__Bacteria; p__Bacteroidetes; c__Bacteroidia; o__Bacteroidales; f__Porphyromonadaceae; g__Parabacteroides; s__	0.0952381	0.648394	958	1379	1101	635	1755	770	839	726	545	874	770	1101
New.ReferenceOTU266	k__Bacteria; p__Bacteroidetes; c__Bacteroidia; o__Bacteroidales; f__S24-7; g__; s__	0.0952381	0.648394	888	986	422	463	1144	530	508	183	19	222	222	888
New.ReferenceOTU281	k__Bacteria; p__Bacteroidetes; c__Bacteroidia; o__Bacteroidales; f__Porphyromonadaceae; g__Parabacteroides; s__	0.0952381	0.648394	79	103	73	31	118	53	70	48	30	56	53	79
New.ReferenceOTU51	k__Bacteria; p__Bacteroidetes; c__Bacteroidia; o__Bacteroidales; f__S24-7; g__; s__	0.0952381	0.648394	189	211	193	97	248	127	144	126	80	121	126	193
175114	k__Bacteria; p__Firmicutes; c__Clostridia; o__Clostridiales; f__; g__; s__	0.103175	0.664397	2	0	1	0	0	5	2	15	0	4	4	0
258550	k__Bacteria; p__Firmicutes; c__Clostridia; o__Clostridiales; f__Ruminococcaceae; g__; s__	0.103175	0.664397	0	63	499	1015	843	0	2	1	1	2	1	499
304080	k__Bacteria; p__Firmicutes; c__Clostridia; o__Clostridiales; f__; g__; s__	0.103175	0.664397	31	15	6	9	4	50	19	64	6	32	32	9
New.CleanUp.ReferenceOTU26980	Unassigned	0.103175	0.664397	2	4	1	4	2	1	7	17	8	5	7	2
New.CleanUp.ReferenceOTU4111	k__Bacteria; p__Firmicutes; c__Clostridia; o__Clostridiales; f__Ruminococcaceae; g__Oscillospira; s__	0.103175	0.664397	3	0	0	0	1	4	0	8	2	5	4	0
New.CleanUp.ReferenceOTU64581	k__Bacteria; p__Firmicutes; c__Clostridia; o__Clostridiales; f__; g__; s__	0.103175	0.664397	3	12	3	5	0	9	6	12	6	9	9	3
4343981	k__Bacteria; p__Tenericutes; c__Mollicutes; o__RF39; f__; g__; s__	0.111111	0.664397	18	12	14	2	23	12	0	9	1	13	9	14
628218	k__Bacteria; p__Firmicutes; c__Clostridia; o__Clostridiales; f__; g__; s__	0.111111	0.664397	65	627	53	278	42	55	53	0	52	2	52	65
New.CleanUp.ReferenceOTU10913	k__Bacteria; p__Bacteroidetes; c__Bacteroidia; o__Bacteroidales; f__Porphyromonadaceae; g__Parabacteroides; s__	0.111111	0.664397	6	6	0	3	5	1	1	0	0	3	1	5
New.CleanUp.ReferenceOTU26558	k__Bacteria; p__Firmicutes; c__Clostridia; o__Clostridiales; f__Ruminococcaceae; g__Oscillospira; s__	0.111111	0.664397	1	2	0	2	1	12	2	7	1	3	3	1
New.CleanUp.ReferenceOTU39637	k__Bacteria; p__Verrucomicrobia; c__Verrucomicrobiae; o__Verrucomicrobiales; f__Verrucomicrobiaceae; g__Akkermansia; s__muciniphila	0.111111	0.664397	2	2	1	3	3	0	0	0	3	0	0	2
New.CleanUp.ReferenceOTU45572	k__Bacteria; p__Firmicutes; c__Clostridia; o__Clostridiales; f__Ruminococcaceae; g__Oscillospira; s__	0.111111	0.664397	2	6	6	0	6	7	5	14	8	6	7	6
New.CleanUp.ReferenceOTU58191	k__Bacteria; p__Bacteroidetes; c__Bacteroidia; o__Bacteroidales; f__Porphyromonadaceae; g__Parabacteroides; s__	0.111111	0.664397	1	0	0	0	2	1	1	1	2	3	1	0
New.CleanUp.ReferenceOTU78341	k__Bacteria; p__Bacteroidetes; c__Bacteroidia; o__Bacteroidales; f__Porphyromonadaceae; g__Parabacteroides; s__	0.111111	0.664397	6	9	9	7	0	1	0	1	3	3	1	7
181249	k__Bacteria; p__Firmicutes; c__Clostridia; o__Clostridiales; f__; g__; s__	0.119048	0.664397	1	3	3	25	2	2	3	0	0	0	0	3
182061	k__Bacteria; p__Firmicutes; c__Clostridia; o__Clostridiales; f__Ruminococcaceae; g__; s__	0.119048	0.664397	7	7	6	6	1	5	10	28	7	9	9	6
193678	k__Bacteria; p__Firmicutes; c__Clostridia; o__Clostridiales; f__Ruminococcaceae; g__; s__	0.119048	0.664397	4	1	3	3	3	10	6	8	0	6	6	3
New.CleanUp.ReferenceOTU19575	k__Bacteria; p__Firmicutes; c__Clostridia; o__Clostridiales; f__Dehalobacteriaceae; g__Dehalobacterium; s__	0.119048	0.664397	1	0	0	1	0	1	1	3	1	1	1	0
New.CleanUp.ReferenceOTU27957	k__Bacteria; p__Firmicutes; c__Clostridia; o__Clostridiales; f__; g__; s__	0.119048	0.664397	4	8	1	3	2	10	10	20	1	11	10	3
New.CleanUp.ReferenceOTU35320	k__Bacteria; p__Firmicutes; c__Clostridia; o__Clostridiales; f__Ruminococcaceae; g__; s__	0.119048	0.664397	1	3	1	1	1	0	1	0	0	2	0	1
New.CleanUp.ReferenceOTU48589	k__Bacteria; p__Firmicutes; c__Clostridia; o__Clostridiales; f__Lachnospiraceae; g__; s__	0.119048	0.664397	2	2	0	2	1	3	4	11	0	4	4	2
New.CleanUp.ReferenceOTU80700	k__Bacteria; p__Firmicutes; c__Clostridia; o__Clostridiales; f__Ruminococcaceae; g__; s__	0.119048	0.664397	0	0	0	2	1	1	1	1	5	1	1	0
New.CleanUp.ReferenceOTU81144	k__Bacteria; p__Firmicutes; c__Clostridia; o__Clostridiales; f__Ruminococcaceae; g__Oscillospira; s__	0.119048	0.664397	3	2	2	3	0	4	1	9	3	7	4	2
New.ReferenceOTU99	k__Bacteria; p__Firmicutes; c__Clostridia; o__Clostridiales; f__; g__; s__	0.119048	0.664397	6	59	29	24	5	6	1	0	0	25	1	24
198209	k__Bacteria; p__Firmicutes; c__Clostridia; o__Clostridiales; f__Clostridiaceae; g__SMB53; s__	0.126984	0.664397	3	6	10	3	12	1	2	1	5	6	2	6
259504	k__Bacteria; p__Firmicutes; c__Clostridia; o__Clostridiales; f__Ruminococcaceae; g__Oscillospira; s__	0.126984	0.664397	0	1	0	0	0	8	1	1	0	78	1	0
273954	k__Bacteria; p__Firmicutes; c__Clostridia; o__Clostridiales; f__; g__; s__	0.126984	0.664397	10	1	6	0	1	1	0	0	0	0	0	1
274095	k__Bacteria; p__Firmicutes; c__Clostridia; o__Clostridiales; f__Lachnospiraceae; g__[Ruminococcus]; s__gnavus	0.126984	0.664397	4	4	8	1	2	2	5	0	0	0	0	4
309290	k__Bacteria; p__Firmicutes; c__Clostridia; o__Clostridiales; f__Ruminococcaceae; g__Oscillospira; s__	0.126984	0.664397	1	0	0	0	0	3	1	2	0	1	1	0
668514	k__Bacteria; p__Proteobacteria; c__Gammaproteobacteria; o__Enterobacteriales; f__Enterobacteriaceae; g__; s__	0.126984	0.664397	4	2	1	0	5	0	0	0	2	0	0	2
New.CleanUp.ReferenceOTU13756	k__Bacteria; p__Firmicutes; c__Clostridia; o__Clostridiales; f__; g__; s__	0.126984	0.664397	0	1	0	0	0	0	1	4	2	1	1	0
New.CleanUp.ReferenceOTU18072	k__Bacteria; p__Firmicutes; c__Clostridia; o__Clostridiales; f__; g__; s__	0.126984	0.664397	12	0	2	3	1	0	0	0	0	2	0	2
New.CleanUp.ReferenceOTU18194	k__Bacteria; p__Firmicutes; c__Clostridia; o__Clostridiales; f__; g__; s__	0.126984	0.664397	1	5	2	6	0	0	0	0	0	2	0	2
New.CleanUp.ReferenceOTU22784	k__Bacteria; p__Firmicutes; c__Clostridia; o__Clostridiales; f__Ruminococcaceae; g__; s__	0.126984	0.664397	1	0	0	0	0	1	0	2	1	3	1	0
New.CleanUp.ReferenceOTU22950	k__Bacteria; p__Firmicutes; c__Clostridia; o__Clostridiales; f__Lachnospiraceae; g__; s__	0.126984	0.664397	0	2	0	0	0	2	1	0	4	3	2	0
New.CleanUp.ReferenceOTU28061	k__Bacteria; p__Firmicutes; c__Clostridia; o__Clostridiales; f__Ruminococcaceae; g__Oscillospira; s__	0.126984	0.664397	1	2	2	0	1	0	0	1	0	0	0	1
New.CleanUp.ReferenceOTU39002	k__Bacteria; p__Firmicutes; c__Clostridia; o__Clostridiales; f__; g__; s__	0.126984	0.664397	17	2	3	0	2	0	0	0	0	2	0	2
New.CleanUp.ReferenceOTU42657	k__Bacteria; p__Firmicutes; c__Clostridia; o__Clostridiales; f__; g__; s__	0.126984	0.664397	0	0	0	1	0	0	1	9	1	2	1	0
New.CleanUp.ReferenceOTU47273	k__Bacteria; p__Bacteroidetes; c__Bacteroidia; o__Bacteroidales; f__Porphyromonadaceae; g__Parabacteroides; s__	0.126984	0.664397	2	3	3	1	0	0	0	2	0	0	0	2
New.CleanUp.ReferenceOTU50091	k__Bacteria; p__Firmicutes; c__Clostridia; o__Clostridiales; f__Ruminococcaceae; g__Oscillospira; s__	0.126984	0.664397	1	0	0	0	0	1	4	11	0	1	1	0
New.CleanUp.ReferenceOTU53948	k__Bacteria; p__Bacteroidetes; c__Bacteroidia; o__Bacteroidales; f__S24-7; g__; s__	0.126984	0.664397	1	1	0	2	2	1	0	0	0	0	0	1
New.CleanUp.ReferenceOTU55332	k__Bacteria; p__Firmicutes; c__Clostridia; o__Clostridiales; f__; g__; s__	0.126984	0.664397	0	1	0	0	0	1	3	1	2	0	1	0
New.CleanUp.ReferenceOTU56962	k__Bacteria; p__Firmicutes; c__Clostridia; o__Clostridiales; f__; g__; s__	0.126984	0.664397	3	0	0	0	0	9	0	2	4	3	3	0
New.CleanUp.ReferenceOTU59659	k__Bacteria; p__Bacteroidetes; c__Bacteroidia; o__Bacteroidales; f__Porphyromonadaceae; g__Parabacteroides; s__	0.126984	0.664397	2	1	2	0	1	0	1	0	0	0	0	1
New.CleanUp.ReferenceOTU69720	k__Bacteria; p__Bacteroidetes; c__Bacteroidia; o__Bacteroidales; f__S24-7; g__; s__	0.126984	0.664397	2	3	1	0	3	0	0	0	0	2	0	2
New.CleanUp.ReferenceOTU77234	k__Bacteria; p__Firmicutes; c__Clostridia; o__Clostridiales; f__; g__; s__	0.126984	0.664397	1	0	0	0	0	1	0	1	2	3	1	0
New.CleanUp.ReferenceOTU79916	k__Bacteria; p__Firmicutes; c__Clostridia; o__Clostridiales; f__Ruminococcaceae; g__Oscillospira; s__	0.126984	0.664397	0	0	0	3	0	0	1	6	6	2	2	0
New.CleanUp.ReferenceOTU83449	k__Bacteria; p__Firmicutes; c__Clostridia; o__Clostridiales; f__; g__; s__	0.126984	0.664397	0	1	0	0	0	1	0	3	1	2	1	0
New.CleanUp.ReferenceOTU9120	k__Bacteria; p__Firmicutes; c__Clostridia; o__Clostridiales; f__Ruminococcaceae; g__; s__	0.126984	0.664397	0	1	0	0	0	0	2	2	1	1	1	0
261799	k__Bacteria; p__Firmicutes; c__Clostridia; o__Clostridiales; f__Ruminococcaceae; g__; s__	0.134921	0.664397	4	3	2	1	8	3	0	2	0	1	1	3
New.CleanUp.ReferenceOTU24954	k__Bacteria; p__Firmicutes; c__Clostridia; o__Clostridiales; f__; g__; s__	0.134921	0.664397	3	6	3	0	1	1	0	0	0	1	0	3
New.CleanUp.ReferenceOTU4326	k__Bacteria; p__Firmicutes; c__Clostridia; o__Clostridiales; f__Ruminococcaceae; g__; s__	0.134921	0.664397	0	1	0	1	0	5	1	3	0	2	2	0
New.CleanUp.ReferenceOTU68422	k__Bacteria; p__Firmicutes; c__Clostridia; o__Clostridiales; f__Lachnospiraceae; g__; s__	0.134921	0.664397	5	2	2	2	0	3	6	3	3	2	3	2
New.CleanUp.ReferenceOTU77494	k__Bacteria; p__Firmicutes; c__Clostridia; o__Clostridiales; f__Lachnospiraceae	0.134921	0.664397	3	0	1	5	2	0	0	1	1	0	0	2
New.CleanUp.ReferenceOTU9246	Unassigned	0.134921	0.664397	3	1	2	0	2	0	1	0	0	1	0	2
New.ReferenceOTU168	k__Bacteria; p__Firmicutes; c__Clostridia; o__Clostridiales; f__Ruminococcaceae; g__; s__	0.134921	0.664397	0	0	1	1	0	5	0	8	2	1	2	0
191583	k__Bacteria; p__Firmicutes; c__Clostridia; o__Clostridiales; f__Lachnospiraceae; g__[Ruminococcus]; s__gnavus	0.142857	0.664397	1	6	8	12	3	0	0	6	4	1	1	6
269886	k__Bacteria; p__Firmicutes; c__Clostridia; o__Clostridiales; f__; g__; s__	0.142857	0.664397	297	3018	1108	1045	285	309	121	6	6	1048	121	1045
272593	k__Bacteria; p__Firmicutes; c__Clostridia; o__Clostridiales; f__Lachnospiraceae; g__[Ruminococcus]; s__gnavus	0.142857	0.664397	0	1	0	0	1	0	2	2	1	2	2	0
4379449	k__Bacteria; p__Firmicutes; c__Erysipelotrichi; o__Erysipelotrichales; f__Erysipelotrichaceae; g__Clostridium; s__saccharogumia	0.142857	0.664397	0	2	1	2	1	5	5	0	5	2	5	1
New.CleanUp.ReferenceOTU27139	k__Bacteria; p__Bacteroidetes; c__Bacteroidia; o__Bacteroidales; f__S24-7; g__; s__	0.142857	0.664397	0	1	0	0	1	2	2	1	0	2	2	0
New.CleanUp.ReferenceOTU27561	k__Bacteria; p__Firmicutes; c__Clostridia; o__Clostridiales; f__Lachnospiraceae; g__; s__	0.142857	0.664397	1	0	2	4	4	0	0	1	0	1	0	2
New.CleanUp.ReferenceOTU31678	k__Bacteria; p__Bacteroidetes; c__Bacteroidia; o__Bacteroidales; f__S24-7; g__; s__	0.142857	0.664397	2	3	3	0	1	0	1	0	0	1	0	2
New.CleanUp.ReferenceOTU33762	k__Bacteria; p__Bacteroidetes; c__Bacteroidia; o__Bacteroidales; f__S24-7; g__; s__	0.142857	0.664397	8	4	7	2	9	4	7	1	0	3	3	7
New.CleanUp.ReferenceOTU36556	k__Bacteria; p__Firmicutes; c__Clostridia; o__Clostridiales; f__Ruminococcaceae; g__Ruminococcus; s__	0.142857	0.664397	2	2	0	8	2	3	4	5	7	4	4	2
New.CleanUp.ReferenceOTU4640	k__Bacteria; p__Firmicutes; c__Clostridia; o__Clostridiales; f__Lachnospiraceae; g__; s__	0.142857	0.664397	0	1	2	0	0	2	2	1	2	1	2	0
New.CleanUp.ReferenceOTU54811	k__Bacteria; p__Firmicutes; c__Clostridia; o__Clostridiales; f__Ruminococcaceae; g__; s__	0.142857	0.664397	1	0	0	2	0	2	1	2	1	2	2	0
New.CleanUp.ReferenceOTU57508	k__Bacteria; p__Firmicutes; c__Clostridia; o__Clostridiales; f__; g__; s__	0.142857	0.664397	1	1	1	1	0	2	2	5	3	0	2	1
New.CleanUp.ReferenceOTU58469	Unassigned	0.142857	0.664397	0	0	0	1	1	2	1	0	2	2	2	0
New.CleanUp.ReferenceOTU73348	k__Bacteria; p__Firmicutes; c__Clostridia; o__Clostridiales; f__Ruminococcaceae; g__; s__	0.142857	0.664397	4	1	0	2	0	5	0	18	3	8	5	1
New.CleanUp.ReferenceOTU7729	k__Bacteria; p__Verrucomicrobia; c__Verrucomicrobiae; o__Verrucomicrobiales; f__Verrucomicrobiaceae; g__Akkermansia; s__muciniphila	0.142857	0.664397	4	1	3	4	1	5	1	6	5	4	5	3
New.CleanUp.ReferenceOTU82140	k__Bacteria; p__Verrucomicrobia; c__Verrucomicrobiae; o__Verrucomicrobiales; f__Verrucomicrobiaceae; g__Akkermansia; s__muciniphila	0.142857	0.664397	5	2	6	3	5	4	3	1	0	3	3	5
New.ReferenceOTU109	k__Bacteria; p__Firmicutes; c__Clostridia; o__Clostridiales; f__Ruminococcaceae; g__; s__	0.142857	0.664397	14	61	7	17	4	14	1	0	6	7	6	14
New.ReferenceOTU155	k__Bacteria; p__Verrucomicrobia; c__Verrucomicrobiae; o__Verrucomicrobiales; f__Verrucomicrobiaceae; g__Akkermansia; s__muciniphila	0.142857	0.664397	10	6	4	4	8	5	3	4	5	1	4	6
New.ReferenceOTU156	k__Bacteria; p__Firmicutes; c__Clostridia; o__Clostridiales; f__; g__; s__	0.142857	0.664397	3	2	0	0	0	9	2	16	0	4	4	0
New.ReferenceOTU91	k__Bacteria; p__Firmicutes; c__Clostridia; o__Clostridiales; f__; g__; s__	0.142857	0.664397	6	15	4	3	1	1	1	0	0	10	1	4
173892	k__Bacteria; p__Firmicutes; c__Clostridia; o__Clostridiales; f__Lachnospiraceae; g__; s__	0.150794	0.664397	715	258	316	937	499	914	672	1908	678	1014	914	499
190242	k__Bacteria; p__Firmicutes; c__Clostridia; o__Clostridiales; f__Ruminococcaceae; g__Ruminococcus; s__	0.150794	0.664397	117	136	101	177	73	195	165	274	74	204	195	117
191445	k__Bacteria; p__Firmicutes; c__Clostridia; o__Clostridiales; f__Ruminococcaceae; g__Oscillospira; s__	0.150794	0.664397	59	8	2	21	19	152	0	217	98	272	152	19
203713	k__Bacteria; p__Bacteroidetes; c__Bacteroidia; o__Bacteroidales; f__S24-7; g__; s__	0.150794	0.664397	36056	53492	31571	14866	52954	20849	24329	20495	16244	25762	20849	36056
238487	k__Bacteria; p__Firmicutes; c__Clostridia; o__Clostridiales; f__Ruminococcaceae; g__Ruminococcus; s__	0.150794	0.664397	74	194	3	113	189	6	2	75	11	9	9	113
262095	k__Bacteria; p__Firmicutes; c__Erysipelotrichi; o__Erysipelotrichales; f__Erysipelotrichaceae; g__; s__	0.150794	0.664397	251	480	854	596	1196	905	948	501	1698	1274	948	596
263138	k__Bacteria; p__Firmicutes; c__Clostridia; o__Clostridiales; f__Lachnospiraceae; g__[Ruminococcus]; s__gnavus	0.150794	0.664397	868	1053	238	3928	819	140	182	575	1468	78	182	868
790663	k__Bacteria; p__Firmicutes; c__Clostridia; o__Clostridiales; f__Lachnospiraceae; g__; s__	0.150794	0.664397	2563	1439	558	1153	4	2442	1787	2393	1478	1999	1999	1153
New.CleanUp.ReferenceOTU25944	k__Bacteria; p__Firmicutes; c__Clostridia; o__Clostridiales; f__Ruminococcaceae; g__Oscillospira; s__	0.150794	0.664397	1	0	1	1	4	2	1	3	5	2	2	1
New.CleanUp.ReferenceOTU46439	k__Bacteria; p__Firmicutes; c__Erysipelotrichi; o__Erysipelotrichales; f__Erysipelotrichaceae; g__Clostridium	0.150794	0.664397	0	1	3	1	6	9	2	2	6	4	4	1
4407703	k__Bacteria; p__Firmicutes; c__Erysipelotrichi; o__Erysipelotrichales; f__Erysipelotrichaceae; g__Coprobacillus; s__	0.15873	0.664397	33	0	252	455	272	8	0	11	91	31	11	252
New.CleanUp.ReferenceOTU18587	k__Bacteria; p__Firmicutes; c__Clostridia; o__Clostridiales; f__Ruminococcaceae; g__; s__	0.15873	0.664397	5	15	8	21	10	4	4	0	15	9	4	10
New.CleanUp.ReferenceOTU79461	k__Bacteria; p__Verrucomicrobia; c__Verrucomicrobiae; o__Verrucomicrobiales; f__Verrucomicrobiaceae; g__Akkermansia; s__muciniphila	0.15873	0.664397	3	1	1	3	1	1	1	1	0	0	1	1
1108078	k__Bacteria; p__Firmicutes; c__Clostridia; o__Clostridiales; f__; g__; s__	0.166667	0.664397	9	20	0	18	0	0	0	0	0	0	0	9
138389	k__Bacteria; p__Firmicutes; c__Bacilli; o__Lactobacillales; f__Enterococcaceae; g__; s__	0.166667	0.664397	0	2	2	3	0	0	0	0	1	0	0	2
158183	k__Bacteria; p__Firmicutes; c__Clostridia; o__Clostridiales; f__Ruminococcaceae; g__Oscillospira; s__	0.166667	0.664397	0	0	0	0	0	2	0	0	2	3	2	0
164237	k__Bacteria; p__Firmicutes; c__Clostridia; o__Clostridiales; f__Lachnospiraceae; g__; s__	0.166667	0.664397	2	0	1	0	2	0	0	0	0	0	0	1
172339	k__Bacteria; p__Firmicutes; c__Clostridia; o__Clostridiales; f__Ruminococcaceae; g__; s__	0.166667	0.664397	2	2	1	0	0	0	0	0	0	0	0	1
173830	k__Bacteria; p__Firmicutes; c__Clostridia; o__Clostridiales; f__Lachnospiraceae; g__; s__	0.166667	0.664397	0	0	0	0	0	1	2	0	0	1	1	0
181714	k__Bacteria; p__Firmicutes; c__Clostridia; o__Clostridiales; f__; g__; s__	0.166667	0.664397	0	0	0	0	0	0	1	3	0	1	1	0
1823053	k__Bacteria; p__Firmicutes; c__Bacilli; o__Lactobacillales; f__Streptococcaceae; g__Lactococcus; s__	0.166667	0.664397	0	2	3	1	0	0	0	0	0	0	0	1
182758	k__Bacteria; p__Firmicutes; c__Bacilli; o__Lactobacillales; f__Lactobacillaceae; g__Lactobacillus; s__	0.166667	0.664397	0	0	2	0	0	0	1	1	3	1	1	0
185338	k__Bacteria; p__Firmicutes; c__Clostridia; o__Clostridiales; f__Lachnospiraceae; g__[Ruminococcus]; s__gnavus	0.166667	0.664397	0	0	0	0	0	1	4	2	0	0	1	0
188576	k__Bacteria; p__Firmicutes; c__Clostridia; o__Clostridiales; f__; g__; s__	0.166667	0.664397	0	0	0	0	0	0	5	1	0	1	1	0
194151	k__Bacteria; p__Firmicutes; c__Clostridia; o__Clostridiales; f__; g__; s__	0.166667	0.664397	10	38	63	24	49	18	6	12	10	48	12	38
196349	k__Bacteria; p__Firmicutes; c__Clostridia; o__Clostridiales; f__Ruminococcaceae; g__; s__	0.166667	0.664397	0	0	0	0	0	1	1	0	0	5	1	0
196848	k__Bacteria; p__Firmicutes; c__Clostridia; o__Clostridiales; f__Clostridiaceae; g__; s__	0.166667	0.664397	1	0	1	0	1	0	0	0	0	0	0	1
197790	k__Bacteria; p__Firmicutes; c__Clostridia; o__Clostridiales; f__; g__; s__	0.166667	0.664397	1	1	0	1	0	0	0	0	0	0	0	1
205613	k__Bacteria; p__Firmicutes; c__Clostridia; o__Clostridiales; f__Lachnospiraceae; g__Coprococcus; s__	0.166667	0.664397	1	0	1	1	0	0	0	0	0	0	0	1
22352	k__Bacteria; p__Firmicutes; c__Clostridia; o__Clostridiales; f__Ruminococcaceae; g__; s__	0.166667	0.664397	0	0	2	1	6	0	0	0	0	0	0	1
229452	k__Bacteria; p__Firmicutes; c__Clostridia; o__Clostridiales; f__; g__; s__	0.166667	0.664397	0	0	0	0	0	1	1	13	0	0	1	0
258717	k__Bacteria; p__Firmicutes; c__Clostridia; o__Clostridiales; f__Lachnospiraceae; g__Dorea; s__	0.166667	0.664397	0	0	0	0	0	0	0	2	1	1	1	0
258969	k__Bacteria; p__Firmicutes; c__Clostridia; o__Clostridiales; f__Lachnospiraceae; g__[Ruminococcus]; s__gnavus	0.166667	0.664397	0	0	0	0	0	1	2	0	3	0	1	0
259580	k__Bacteria; p__Firmicutes; c__Clostridia; o__Clostridiales; f__Lachnospiraceae; g__; s__	0.166667	0.664397	1	2	0	7	0	0	0	0	0	0	0	1
260018	k__Bacteria; p__Firmicutes; c__Clostridia; o__Clostridiales; f__; g__; s__	0.166667	0.664397	0	0	0	0	0	0	2	2	0	1	1	0
260679	k__Bacteria; p__Firmicutes; c__Clostridia; o__Clostridiales; f__; g__; s__	0.166667	0.664397	0	0	0	0	0	25	0	12	0	13	12	0
261209	k__Bacteria; p__Firmicutes; c__Clostridia; o__Clostridiales; f__Ruminococcaceae; g__Oscillospira; s__	0.166667	0.664397	0	0	0	0	0	2	1	3	0	0	1	0
261277	k__Bacteria; p__Firmicutes; c__Clostridia; o__Clostridiales; f__Lachnospiraceae; g__; s__	0.166667	0.664397	1	0	1	0	1	0	0	0	0	0	0	1
263403	k__Bacteria; p__Firmicutes; c__Clostridia; o__Clostridiales; f__Ruminococcaceae; g__Oscillospira; s__	0.166667	0.664397	0	0	0	0	0	1	0	3	0	2	1	0
264134	k__Bacteria; p__Firmicutes; c__Clostridia; o__Clostridiales; f__; g__; s__	0.166667	0.664397	7	10	13	6	9	15	3	22	13	14	14	9
264437	k__Bacteria; p__Firmicutes; c__Clostridia; o__Clostridiales; f__Lachnospiraceae; g__Dorea; s__	0.166667	0.664397	0	0	0	0	0	1	1	0	0	2	1	0
265116	k__Bacteria; p__Firmicutes; c__Clostridia; o__Clostridiales; f__Lachnospiraceae; g__; s__	0.166667	0.664397	0	1	0	9	1	0	0	0	0	0	0	1
265958	k__Bacteria; p__Firmicutes; c__Clostridia; o__Clostridiales; f__Ruminococcaceae; g__; s__	0.166667	0.664397	0	0	0	0	0	1	0	5	1	0	1	0
266508	k__Bacteria; p__Firmicutes; c__Clostridia; o__Clostridiales; f__; g__; s__	0.166667	0.664397	0	0	0	0	0	0	0	1	1	2	1	0
266583	k__Bacteria; p__Firmicutes; c__Clostridia; o__Clostridiales; f__Lachnospiraceae; g__; s__	0.166667	0.664397	0	0	0	0	0	4	0	2	0	1	1	0
266896	k__Bacteria; p__Firmicutes; c__Clostridia; o__Clostridiales; f__Lachnospiraceae; g__[Ruminococcus]; s__gnavus	0.166667	0.664397	0	0	0	0	0	1	2	0	1	0	1	0
267298	k__Bacteria; p__Firmicutes; c__Clostridia; o__Clostridiales; f__Lachnospiraceae; g__[Ruminococcus]; s__gnavus	0.166667	0.664397	0	0	0	0	0	0	1	1	1	0	1	0
268612	k__Bacteria; p__Firmicutes; c__Clostridia; o__Clostridiales; f__; g__; s__	0.166667	0.664397	0	2	2	2	0	0	0	0	0	1	0	2
268668	k__Bacteria; p__Firmicutes; c__Clostridia; o__Clostridiales; f__Lachnospiraceae; g__; s__	0.166667	0.664397	0	1	0	2	1	0	0	0	0	0	0	1
269285	k__Bacteria; p__Firmicutes; c__Clostridia; o__Clostridiales; f__Ruminococcaceae; g__; s__	0.166667	0.664397	0	0	0	0	0	1	0	0	1	2	1	0
269814	k__Bacteria; p__Firmicutes; c__Clostridia; o__Clostridiales; f__Ruminococcaceae; g__Oscillospira; s__	0.166667	0.664397	0	0	0	1	0	1	1	2	1	0	1	0
270448	k__Bacteria; p__Firmicutes; c__Clostridia; o__Clostridiales; f__; g__; s__	0.166667	0.664397	0	0	3	4	1	0	0	0	0	0	0	1
273179	k__Bacteria; p__Firmicutes; c__Clostridia; o__Clostridiales; f__Lachnospiraceae; g__[Ruminococcus]; s__gnavus	0.166667	0.664397	0	0	0	0	0	0	3	2	1	0	1	0
273586	k__Bacteria; p__Firmicutes; c__Clostridia; o__Clostridiales; f__; g__; s__	0.166667	0.664397	0	0	0	0	0	0	0	1	5	4	1	0
273928	k__Bacteria; p__Firmicutes; c__Clostridia; o__Clostridiales; f__; g__; s__	0.166667	0.664397	0	0	0	0	0	0	1	3	0	3	1	0
276312	k__Bacteria; p__Firmicutes; c__Clostridia; o__Clostridiales; f__; g__; s__	0.166667	0.664397	1	0	1	3	0	0	0	0	0	0	0	1
276580	k__Bacteria; p__Firmicutes; c__Clostridia; o__Clostridiales; f__; g__; s__	0.166667	0.664397	1	1	0	0	1	0	0	0	0	0	0	1
276770	k__Bacteria; p__Firmicutes; c__Clostridia; o__Clostridiales; f__; g__; s__	0.166667	0.664397	0	0	0	0	0	4	1	0	0	2	1	0
276941	k__Bacteria; p__Firmicutes; c__Clostridia; o__Clostridiales; f__Lachnospiraceae; g__[Ruminococcus]; s__gnavus	0.166667	0.664397	0	0	0	0	0	1	0	1	1	0	1	0
291179	k__Bacteria; p__Firmicutes; c__Clostridia; o__Clostridiales; f__Lachnospiraceae; g__Blautia; s__	0.166667	0.664397	0	2	1	10	0	0	0	0	0	0	0	1
2985051	k__Bacteria; p__Actinobacteria; c__Coriobacteriia; o__Coriobacteriales; f__Coriobacteriaceae; g__; s__	0.166667	0.664397	0	0	1	1	2	0	0	0	0	0	0	1
298723	k__Bacteria; p__Firmicutes; c__Clostridia; o__Clostridiales; f__; g__; s__	0.166667	0.664397	0	0	0	0	0	1	0	1	1	0	1	0
300582	k__Bacteria; p__Firmicutes; c__Clostridia; o__Clostridiales; f__Clostridiaceae; g__; s__	0.166667	0.664397	2	0	1	0	1	0	0	0	0	0	0	1
301727	k__Bacteria; p__Firmicutes; c__Clostridia; o__Clostridiales; f__Lachnospiraceae; g__; s__	0.166667	0.664397	0	6	2	11	0	0	0	0	0	0	0	2
305288	k__Bacteria; p__Firmicutes; c__Clostridia; o__Clostridiales; f__Clostridiaceae; g__Clostridium; s__	0.166667	0.664397	0	3	5	0	1	0	0	0	0	0	0	1
316496	k__Bacteria; p__Firmicutes; c__Clostridia; o__Clostridiales; f__Clostridiaceae; g__SMB53; s__	0.166667	0.664397	1	0	1	0	0	1	1	1	1	1	1	0
317633	k__Bacteria; p__Firmicutes; c__Clostridia; o__Clostridiales; f__Ruminococcaceae; g__Oscillospira; s__	0.166667	0.664397	0	0	0	0	0	94	1	0	0	52	1	0
318370	k__Bacteria; p__Firmicutes; c__Clostridia; o__Clostridiales; f__Ruminococcaceae; g__; s__	0.166667	0.664397	0	1	0	8	1	0	0	0	0	0	0	1
318764	k__Bacteria; p__Firmicutes; c__Bacilli; o__Lactobacillales; f__Lactobacillaceae; g__Lactobacillus; s__	0.166667	0.664397	0	0	0	0	0	0	1	0	1	1	1	0
330754	k__Bacteria; p__Firmicutes; c__Clostridia; o__Clostridiales; f__; g__; s__	0.166667	0.664397	0	0	0	0	0	2	0	0	2	1	1	0
333079	k__Bacteria; p__Firmicutes; c__Clostridia; o__Clostridiales; f__Ruminococcaceae; g__Ruminococcus; s__	0.166667	0.664397	0	0	0	0	0	1	0	1	0	2	1	0
333351	k__Bacteria; p__Firmicutes; c__Clostridia; o__Clostridiales; f__; g__; s__	0.166667	0.664397	0	0	1	0	0	0	4	3	0	24	3	0
337468	k__Bacteria; p__Firmicutes; c__Clostridia; o__Clostridiales; f__Ruminococcaceae; g__; s__	0.166667	0.664397	0	0	0	0	0	0	0	2	3	1	1	0
338640	k__Bacteria; p__Firmicutes; c__Clostridia; o__Clostridiales; f__Ruminococcaceae; g__Ruminococcus; s__	0.166667	0.664397	1	1	0	1	0	0	0	0	0	0	0	1
341713	k__Bacteria; p__Firmicutes; c__Clostridia; o__Clostridiales; f__Ruminococcaceae; g__; s__	0.166667	0.664397	0	0	0	0	0	3	0	3	1	0	1	0
342075	k__Bacteria; p__Firmicutes; c__Clostridia; o__Clostridiales; f__; g__; s__	0.166667	0.664397	0	0	0	0	0	0	1	1	0	1	1	0
351062	k__Bacteria; p__Firmicutes; c__Clostridia; o__Clostridiales; f__Lachnospiraceae; g__; s__	0.166667	0.664397	0	0	2	0	0	1	2	0	1	5	1	0
375106	k__Bacteria; p__Firmicutes; c__Clostridia; o__Clostridiales; f__Ruminococcaceae; g__; s__	0.166667	0.664397	0	0	0	0	0	63	0	34	0	73	34	0
3765807	k__Bacteria; p__Firmicutes; c__Clostridia; o__Clostridiales; f__Lachnospiraceae; g__; s__	0.166667	0.664397	0	0	0	0	0	1	1	0	0	1	1	0
397065	k__Bacteria; p__Firmicutes; c__Clostridia; o__Clostridiales; f__Lachnospiraceae; g__Coprococcus; s__	0.166667	0.664397	0	4	1	1	0	0	0	0	0	0	0	1
400739	k__Bacteria; p__Firmicutes; c__Clostridia; o__Clostridiales; f__Lachnospiraceae; g__Dorea; s__	0.166667	0.664397	0	1	1	0	1	0	0	0	0	0	0	1
4070490	k__Bacteria; p__Firmicutes; c__Clostridia; o__Clostridiales; f__Ruminococcaceae; g__; s__	0.166667	0.664397	0	0	11	9	7	0	0	0	0	0	0	7
4238179	k__Bacteria; p__Firmicutes; c__Clostridia; o__Clostridiales; f__Clostridiaceae; g__; s__	0.166667	0.664397	2	0	2	0	1	0	0	0	0	0	0	1
4315688	k__Bacteria; p__Firmicutes; c__Clostridia; o__Clostridiales; f__Clostridiaceae; g__Clostridium; s__celatum	0.166667	0.664397	0	1	2	0	1	0	0	0	0	0	0	1
4335302	k__Bacteria; p__Firmicutes; c__Clostridia; o__Clostridiales; f__Ruminococcaceae; g__Oscillospira; s__	0.166667	0.664397	0	0	0	0	0	1	0	1	0	5	1	0
4374042	k__Bacteria; p__Deferribacteres; c__Deferribacteres; o__Deferribacterales; f__Deferribacteraceae; g__Mucispirillum; s__schaedleri	0.166667	0.664397	14	1	0	1	0	0	0	0	0	0	0	1
4434203	k__Bacteria; p__Firmicutes; c__Clostridia; o__Clostridiales; f__Ruminococcaceae; g__Oscillospira; s__	0.166667	0.664397	1	0	2	2	0	0	0	0	0	0	0	1
4460680	k__Bacteria; p__Firmicutes; c__Clostridia; o__Clostridiales; f__Ruminococcaceae; g__; s__	0.166667	0.664397	0	0	1	1	3	0	0	0	0	0	0	1
457614	k__Bacteria; p__Firmicutes; c__Clostridia; o__Clostridiales; f__Lachnospiraceae; g__; s__	0.166667	0.664397	1	1	0	1	0	0	0	0	0	0	0	1
524515	k__Bacteria; p__Firmicutes; c__Clostridia; o__Clostridiales; f__Lachnospiraceae; g__; s__	0.166667	0.664397	2	2	0	1	0	0	0	0	0	0	0	1
818516	k__Bacteria; p__Firmicutes; c__Clostridia; o__Clostridiales; f__Clostridiaceae; g__Clostridium; s__botulinum	0.166667	0.664397	0	1	1	1	0	0	0	0	0	0	0	1
826302	k__Bacteria; p__Firmicutes; c__Clostridia; o__Clostridiales; f__Lachnospiraceae; g__Coprococcus; s__	0.166667	0.664397	2	2	0	3	0	0	0	0	0	0	0	2
New.CleanUp.ReferenceOTU10583	k__Bacteria; p__Bacteroidetes; c__Bacteroidia; o__Bacteroidales; f__Porphyromonadaceae; g__Parabacteroides; s__	0.166667	0.664397	0	0	0	0	0	0	0	1	1	1	1	0
New.CleanUp.ReferenceOTU10735	k__Bacteria; p__Firmicutes; c__Clostridia; o__Clostridiales; f__Lachnospiraceae; g__; s__	0.166667	0.664397	0	0	0	1	0	1	1	1	0	3	1	0
New.CleanUp.ReferenceOTU10871	k__Bacteria; p__Firmicutes; c__Clostridia; o__Clostridiales; f__Ruminococcaceae; g__Oscillospira; s__	0.166667	0.664397	0	0	0	0	0	2	0	2	2	0	2	0
New.CleanUp.ReferenceOTU11599	k__Bacteria; p__Firmicutes; c__Clostridia; o__Clostridiales; f__Lachnospiraceae; g__[Ruminococcus]; s__gnavus	0.166667	0.664397	0	0	0	0	0	1	1	0	1	0	1	0
New.CleanUp.ReferenceOTU11735	k__Bacteria; p__Firmicutes; c__Clostridia; o__Clostridiales	0.166667	0.664397	0	1	2	1	0	0	0	0	0	0	0	1
New.CleanUp.ReferenceOTU11930	k__Bacteria; p__Bacteroidetes; c__Bacteroidia; o__Bacteroidales; f__S24-7; g__; s__	0.166667	0.664397	10	1	0	1	0	0	0	0	0	0	0	1
New.CleanUp.ReferenceOTU12486	k__Bacteria; p__Bacteroidetes; c__Bacteroidia; o__Bacteroidales; f__Porphyromonadaceae; g__Parabacteroides; s__	0.166667	0.664397	0	1	0	2	1	0	0	0	0	0	0	1
New.CleanUp.ReferenceOTU12687	k__Bacteria; p__Firmicutes; c__Clostridia; o__Clostridiales; f__Ruminococcaceae; g__Oscillospira; s__	0.166667	0.664397	0	0	0	0	0	1	0	0	1	1	1	0
New.CleanUp.ReferenceOTU12849	k__Bacteria; p__Firmicutes; c__Clostridia; o__Clostridiales; f__Ruminococcaceae; g__Oscillospira; s__	0.166667	0.664397	0	0	0	0	0	1	0	1	1	0	1	0
New.CleanUp.ReferenceOTU12979	k__Bacteria; p__Firmicutes; c__Clostridia; o__Clostridiales; f__; g__; s__	0.166667	0.664397	0	0	1	0	0	1	0	2	1	1	1	0
New.CleanUp.ReferenceOTU13386	k__Bacteria; p__Firmicutes; c__Clostridia; o__Clostridiales; f__Ruminococcaceae; g__; s__	0.166667	0.664397	0	0	0	0	0	0	0	3	5	2	2	0
New.CleanUp.ReferenceOTU13561	k__Bacteria; p__Firmicutes; c__Clostridia; o__Clostridiales; f__Ruminococcaceae; g__Oscillospira; s__	0.166667	0.664397	0	0	0	0	0	1	0	4	3	0	1	0
New.CleanUp.ReferenceOTU13616	k__Bacteria; p__Firmicutes; c__Clostridia; o__Clostridiales; f__; g__; s__	0.166667	0.664397	1	1	0	6	1	0	0	0	3	0	0	1
New.CleanUp.ReferenceOTU14691	k__Bacteria; p__Firmicutes; c__Clostridia; o__Clostridiales; f__Lachnospiraceae; g__; s__	0.166667	0.664397	6	1	1	0	0	0	0	0	0	0	0	1
New.CleanUp.ReferenceOTU14726	k__Bacteria; p__Firmicutes; c__Clostridia; o__Clostridiales; f__Ruminococcaceae; g__Oscillospira; s__	0.166667	0.664397	0	7	2	1	0	0	0	0	0	0	0	1
New.CleanUp.ReferenceOTU14826	k__Bacteria; p__Firmicutes; c__Clostridia; o__Clostridiales; f__; g__; s__	0.166667	0.664397	7	0	8	0	1	0	0	0	0	0	0	1
New.CleanUp.ReferenceOTU15173	k__Bacteria; p__Firmicutes; c__Clostridia; o__Clostridiales; f__; g__; s__	0.166667	0.664397	0	0	0	0	0	0	1	1	0	1	1	0
New.CleanUp.ReferenceOTU16194	k__Bacteria; p__Firmicutes; c__Clostridia; o__Clostridiales; f__; g__; s__	0.166667	0.664397	0	0	0	0	0	1	0	1	0	1	1	0
New.CleanUp.ReferenceOTU16609	k__Bacteria; p__Firmicutes; c__Clostridia; o__Clostridiales; f__; g__; s__	0.166667	0.664397	0	4	3	0	1	0	0	0	0	0	0	1
New.CleanUp.ReferenceOTU16655	k__Bacteria; p__Firmicutes; c__Clostridia; o__Clostridiales; f__Ruminococcaceae; g__Oscillospira; s__	0.166667	0.664397	0	1	0	1	1	0	0	0	0	0	0	1
New.CleanUp.ReferenceOTU17074	k__Bacteria; p__Firmicutes; c__Clostridia; o__Clostridiales; f__; g__; s__	0.166667	0.664397	1	1	0	1	0	0	0	0	0	0	0	1
New.CleanUp.ReferenceOTU17247	k__Bacteria; p__Firmicutes; c__Clostridia; o__Clostridiales; f__Ruminococcaceae	0.166667	0.664397	0	0	0	0	0	3	0	5	2	0	2	0
New.CleanUp.ReferenceOTU17429	k__Bacteria; p__Firmicutes; c__Clostridia; o__Clostridiales; f__; g__; s__	0.166667	0.664397	0	0	0	0	0	2	1	3	0	0	1	0
New.CleanUp.ReferenceOTU17628	k__Bacteria; p__Firmicutes; c__Clostridia; o__Clostridiales; f__; g__; s__	0.166667	0.664397	0	0	0	0	0	0	0	2	2	3	2	0
New.CleanUp.ReferenceOTU17699	k__Bacteria; p__Firmicutes; c__Clostridia; o__Clostridiales; f__Ruminococcaceae; g__; s__	0.166667	0.664397	0	0	0	0	0	0	1	1	1	0	1	0
New.CleanUp.ReferenceOTU17729	k__Bacteria; p__Firmicutes; c__Clostridia; o__Clostridiales; f__Ruminococcaceae; g__Oscillospira; s__	0.166667	0.664397	0	0	0	0	0	0	1	0	1	2	1	0
New.CleanUp.ReferenceOTU18009	k__Bacteria; p__Firmicutes; c__Clostridia; o__Clostridiales; f__Clostridiaceae; g__; s__	0.166667	0.664397	0	1	0	0	0	1	0	1	1	2	1	0
New.CleanUp.ReferenceOTU18157	k__Bacteria; p__Firmicutes; c__Clostridia; o__Clostridiales; f__Ruminococcaceae; g__; s__	0.166667	0.664397	0	0	0	0	0	1	0	4	0	1	1	0
New.CleanUp.ReferenceOTU18675	k__Bacteria; p__Verrucomicrobia; c__Verrucomicrobiae; o__Verrucomicrobiales; f__Verrucomicrobiaceae; g__Akkermansia; s__muciniphila	0.166667	0.664397	1	0	1	0	1	0	0	0	0	0	0	1
New.CleanUp.ReferenceOTU18701	k__Bacteria; p__Firmicutes; c__Clostridia; o__Clostridiales	0.166667	0.664397	0	0	0	0	0	0	0	3	1	2	1	0
New.CleanUp.ReferenceOTU19090	k__Bacteria; p__Firmicutes; c__Clostridia; o__Clostridiales; f__; g__; s__	0.166667	0.664397	0	0	0	0	0	1	1	0	0	1	1	0
New.CleanUp.ReferenceOTU19101	k__Bacteria; p__Deferribacteres; c__Deferribacteres; o__Deferribacterales; f__Deferribacteraceae; g__Mucispirillum; s__schaedleri	0.166667	0.664397	13	1	1	0	0	0	0	0	0	0	0	1
New.CleanUp.ReferenceOTU19118	k__Bacteria; p__Firmicutes; c__Clostridia; o__Clostridiales; f__Lachnospiraceae; g__; s__	0.166667	0.664397	0	0	0	0	0	0	0	1	1	1	1	0
New.CleanUp.ReferenceOTU19245	k__Bacteria; p__Firmicutes; c__Clostridia; o__Clostridiales; f__Ruminococcaceae; g__Oscillospira; s__	0.166667	0.664397	0	0	1	0	0	0	3	5	0	2	2	0
New.CleanUp.ReferenceOTU19307	k__Bacteria; p__Firmicutes; c__Clostridia; o__Clostridiales; f__Ruminococcaceae; g__; s__	0.166667	0.664397	3	2	0	1	0	0	0	0	0	0	0	1
New.CleanUp.ReferenceOTU1939	k__Bacteria; p__Firmicutes; c__Clostridia; o__Clostridiales; f__Clostridiaceae; g__; s__	0.166667	0.664397	1	0	2	0	1	0	0	0	0	0	0	1
New.CleanUp.ReferenceOTU2012	k__Bacteria; p__Firmicutes; c__Clostridia; o__Clostridiales; f__; g__; s__	0.166667	0.664397	0	0	0	0	0	1	1	2	0	0	1	0
New.CleanUp.ReferenceOTU2017	k__Bacteria; p__Firmicutes; c__Clostridia; o__Clostridiales; f__; g__; s__	0.166667	0.664397	0	0	0	0	0	0	0	4	4	1	1	0
New.CleanUp.ReferenceOTU20941	k__Bacteria; p__Firmicutes; c__Clostridia; o__Clostridiales; f__Lachnospiraceae; g__; s__	0.166667	0.664397	5	4	0	1	0	0	0	0	0	0	0	1
New.CleanUp.ReferenceOTU20991	k__Bacteria; p__Firmicutes; c__Clostridia; o__Clostridiales; f__; g__; s__	0.166667	0.664397	0	0	0	0	0	2	0	2	1	0	1	0
New.CleanUp.ReferenceOTU2112	k__Bacteria; p__Firmicutes; c__Clostridia; o__Clostridiales; f__Ruminococcaceae; g__; s__	0.166667	0.664397	0	0	0	0	0	3	0	1	1	0	1	0
New.CleanUp.ReferenceOTU21606	k__Bacteria; p__Firmicutes; c__Clostridia; o__Clostridiales; f__; g__; s__	0.166667	0.664397	0	0	2	0	0	0	1	1	2	4	1	0
New.CleanUp.ReferenceOTU21717	k__Bacteria; p__Firmicutes; c__Bacilli; o__Lactobacillales; f__Lactobacillaceae; g__Lactobacillus; s__	0.166667	0.664397	0	0	0	1	0	0	2	0	2	4	2	0
New.CleanUp.ReferenceOTU21721	k__Bacteria; p__Bacteroidetes; c__Bacteroidia; o__Bacteroidales; f__S24-7; g__; s__	0.166667	0.664397	1	2	0	0	1	0	0	0	0	0	0	1
New.CleanUp.ReferenceOTU22008	k__Bacteria; p__Firmicutes; c__Clostridia; o__Clostridiales; f__Ruminococcaceae; g__; s__	0.166667	0.664397	0	1	0	0	0	4	0	12	2	0	2	0
New.CleanUp.ReferenceOTU22145	k__Bacteria; p__Verrucomicrobia; c__Verrucomicrobiae; o__Verrucomicrobiales; f__Verrucomicrobiaceae; g__Akkermansia; s__muciniphila	0.166667	0.664397	0	0	0	1	0	0	2	0	2	2	2	0
New.CleanUp.ReferenceOTU22783	k__Bacteria; p__Firmicutes; c__Clostridia; o__Clostridiales; f__; g__; s__	0.166667	0.664397	0	1	1	1	0	0	0	0	0	0	0	1
New.CleanUp.ReferenceOTU23233	k__Bacteria; p__Firmicutes; c__Clostridia; o__Clostridiales; f__Ruminococcaceae; g__; s__	0.166667	0.664397	0	0	0	0	0	1	1	0	0	1	1	0
New.CleanUp.ReferenceOTU23348	k__Bacteria; p__Firmicutes; c__Clostridia; o__Clostridiales; f__; g__; s__	0.166667	0.664397	0	1	0	0	0	2	1	0	1	1	1	0
New.CleanUp.ReferenceOTU23557	Unassigned	0.166667	0.664397	1	1	0	0	1	0	0	0	0	0	0	1
New.CleanUp.ReferenceOTU23595	Unassigned	0.166667	0.664397	0	0	0	0	0	1	1	13	0	0	1	0
New.CleanUp.ReferenceOTU23743	k__Bacteria; p__Firmicutes; c__Clostridia; o__Clostridiales; f__; g__; s__	0.166667	0.664397	0	0	0	0	0	2	0	4	1	0	1	0
New.CleanUp.ReferenceOTU24318	k__Bacteria; p__Firmicutes; c__Clostridia; o__Clostridiales; f__Ruminococcaceae; g__; s__	0.166667	0.664397	0	0	5	2	6	0	0	0	0	0	0	2
New.CleanUp.ReferenceOTU24661	k__Bacteria; p__Firmicutes; c__Clostridia; o__Clostridiales; f__Ruminococcaceae; g__Oscillospira; s__	0.166667	0.664397	0	2	2	1	0	0	0	0	0	0	0	1
New.CleanUp.ReferenceOTU25276	k__Bacteria; p__Firmicutes; c__Clostridia; o__Clostridiales; f__; g__; s__	0.166667	0.664397	0	0	0	0	0	1	1	1	0	0	1	0
New.CleanUp.ReferenceOTU25372	k__Bacteria; p__Firmicutes; c__Clostridia; o__Clostridiales; f__Ruminococcaceae; g__Oscillospira; s__	0.166667	0.664397	0	0	0	0	0	1	0	2	1	0	1	0
New.CleanUp.ReferenceOTU25485	k__Bacteria; p__Firmicutes; c__Clostridia; o__Clostridiales; f__Lachnospiraceae; g__; s__	0.166667	0.664397	3	2	2	0	0	0	0	0	0	0	0	2
New.CleanUp.ReferenceOTU25909	k__Bacteria; p__Firmicutes; c__Clostridia; o__Clostridiales; f__; g__; s__	0.166667	0.664397	0	0	0	0	0	1	1	0	2	0	1	0
New.CleanUp.ReferenceOTU26446	k__Bacteria; p__Firmicutes; c__Clostridia; o__Clostridiales; f__; g__; s__	0.166667	0.664397	0	0	2	0	0	0	1	1	9	2	1	0
New.CleanUp.ReferenceOTU2651	k__Bacteria; p__Bacteroidetes; c__Bacteroidia; o__Bacteroidales; f__S24-7; g__; s__	0.166667	0.664397	2	0	0	2	2	0	0	0	0	0	0	2
New.CleanUp.ReferenceOTU26571	k__Bacteria; p__Firmicutes; c__Clostridia; o__Clostridiales; f__Lachnospiraceae; g__[Ruminococcus]; s__gnavus	0.166667	0.664397	0	0	0	0	0	1	0	2	0	1	1	0
New.CleanUp.ReferenceOTU27401	k__Bacteria; p__Bacteroidetes; c__Bacteroidia; o__Bacteroidales; f__S24-7; g__; s__	0.166667	0.664397	0	0	0	0	0	1	0	0	1	1	1	0
New.CleanUp.ReferenceOTU27712	k__Bacteria; p__Firmicutes; c__Clostridia; o__Clostridiales; f__Lachnospiraceae; g__[Ruminococcus]; s__gnavus	0.166667	0.664397	0	0	0	0	0	1	0	0	2	1	1	0
New.CleanUp.ReferenceOTU27793	k__Bacteria; p__Verrucomicrobia; c__Verrucomicrobiae; o__Verrucomicrobiales; f__Verrucomicrobiaceae; g__Akkermansia; s__muciniphila	0.166667	0.664397	0	0	0	0	0	0	1	1	0	3	1	0
New.CleanUp.ReferenceOTU28248	k__Bacteria; p__Firmicutes; c__Clostridia; o__Clostridiales; f__; g__; s__	0.166667	0.664397	0	0	0	0	0	0	0	4	3	1	1	0
New.CleanUp.ReferenceOTU28595	Unassigned	0.166667	0.664397	0	3	2	1	0	0	0	0	0	0	0	1
New.CleanUp.ReferenceOTU28787	k__Bacteria; p__Firmicutes; c__Clostridia; o__Clostridiales; f__; g__; s__	0.166667	0.664397	0	0	0	0	0	0	3	13	5	0	3	0
New.CleanUp.ReferenceOTU2902	k__Bacteria; p__Firmicutes; c__Clostridia; o__Clostridiales; f__Lachnospiraceae; g__[Ruminococcus]; s__gnavus	0.166667	0.664397	0	0	0	0	0	4	0	1	3	0	1	0
New.CleanUp.ReferenceOTU29072	k__Bacteria; p__Bacteroidetes; c__Bacteroidia; o__Bacteroidales; f__Porphyromonadaceae; g__Parabacteroides; s__	0.166667	0.664397	0	0	0	0	0	1	2	0	1	0	1	0
New.CleanUp.ReferenceOTU29085	k__Bacteria; p__Firmicutes; c__Clostridia; o__Clostridiales; f__Lachnospiraceae; g__; s__	0.166667	0.664397	0	0	0	0	0	2	0	0	1	2	1	0
New.CleanUp.ReferenceOTU2952	k__Bacteria; p__Firmicutes; c__Clostridia; o__Clostridiales	0.166667	0.664397	0	0	0	0	0	0	2	1	1	0	1	0
New.CleanUp.ReferenceOTU29529	k__Bacteria; p__Bacteroidetes; c__Bacteroidia; o__Bacteroidales; f__S24-7; g__; s__	0.166667	0.664397	7	18	15	9	25	15	4	8	5	11	8	15
New.CleanUp.ReferenceOTU29558	k__Bacteria; p__Firmicutes; c__Clostridia; o__Clostridiales; f__Ruminococcaceae; g__; s__	0.166667	0.664397	0	0	0	0	0	2	0	3	3	0	2	0
New.CleanUp.ReferenceOTU29636	k__Bacteria; p__Firmicutes; c__Clostridia; o__Clostridiales; f__Ruminococcaceae; g__; s__	0.166667	0.664397	3	2	13	3	37	3	1	0	2	5	2	3
New.CleanUp.ReferenceOTU29907	k__Bacteria; p__Firmicutes; c__Clostridia; o__Clostridiales; f__; g__; s__	0.166667	0.664397	0	2	0	0	0	2	4	2	1	0	2	0
New.CleanUp.ReferenceOTU30505	k__Bacteria; p__Firmicutes; c__Clostridia; o__Clostridiales; f__; g__; s__	0.166667	0.664397	0	0	0	0	0	1	0	4	1	0	1	0
New.CleanUp.ReferenceOTU30736	k__Bacteria; p__Verrucomicrobia; c__Verrucomicrobiae; o__Verrucomicrobiales; f__Verrucomicrobiaceae; g__Akkermansia; s__muciniphila	0.166667	0.664397	0	0	0	0	0	1	1	0	0	1	1	0
New.CleanUp.ReferenceOTU30928	k__Bacteria; p__Firmicutes; c__Clostridia; o__Clostridiales; f__; g__; s__	0.166667	0.664397	0	0	0	0	0	4	1	0	4	0	1	0
New.CleanUp.ReferenceOTU30963	Unassigned	0.166667	0.664397	0	1	1	1	0	0	0	0	0	0	0	1
New.CleanUp.ReferenceOTU31899	k__Bacteria; p__Firmicutes; c__Clostridia; o__Clostridiales; f__Lachnospiraceae; g__; s__	0.166667	0.664397	2	0	1	0	1	0	0	0	0	0	0	1
New.CleanUp.ReferenceOTU31939	k__Bacteria; p__Firmicutes; c__Clostridia; o__Clostridiales; f__Ruminococcaceae; g__Oscillospira; s__	0.166667	0.664397	0	0	1	1	1	0	0	0	0	0	0	1
New.CleanUp.ReferenceOTU3223	k__Bacteria; p__Bacteroidetes; c__Bacteroidia; o__Bacteroidales; f__S24-7; g__; s__	0.166667	0.664397	0	1	1	1	0	0	0	0	0	0	0	1
New.CleanUp.ReferenceOTU32243	k__Bacteria; p__Firmicutes; c__Clostridia; o__Clostridiales; f__Ruminococcaceae; g__Oscillospira; s__	0.166667	0.664397	0	0	0	0	0	0	1	2	2	0	1	0
New.CleanUp.ReferenceOTU32431	k__Bacteria; p__Bacteroidetes; c__Bacteroidia; o__Bacteroidales; f__Porphyromonadaceae; g__Parabacteroides; s__	0.166667	0.664397	0	0	0	0	0	0	0	1	2	1	1	0
New.CleanUp.ReferenceOTU32537	k__Bacteria; p__Firmicutes; c__Clostridia; o__Clostridiales; f__Lachnospiraceae; g__; s__	0.166667	0.664397	0	0	2	0	0	8	0	6	0	12	6	0
New.CleanUp.ReferenceOTU32559	k__Bacteria; p__Firmicutes; c__Clostridia; o__Clostridiales; f__; g__; s__	0.166667	0.664397	0	0	0	0	0	0	1	2	0	1	1	0
New.CleanUp.ReferenceOTU32821	k__Bacteria; p__Firmicutes; c__Clostridia; o__Clostridiales; f__Ruminococcaceae; g__; s__	0.166667	0.664397	0	0	0	0	0	1	0	4	1	0	1	0
New.CleanUp.ReferenceOTU33733	k__Bacteria; p__Bacteroidetes; c__Bacteroidia; o__Bacteroidales; f__Porphyromonadaceae; g__Parabacteroides; s__	0.166667	0.664397	0	1	0	0	0	0	0	3	4	3	3	0
New.CleanUp.ReferenceOTU33756	k__Bacteria; p__Bacteroidetes; c__Bacteroidia; o__Bacteroidales; f__S24-7; g__; s__	0.166667	0.664397	1	1	1	0	0	0	0	0	0	0	0	1
New.CleanUp.ReferenceOTU340	k__Bacteria; p__Firmicutes; c__Clostridia; o__Clostridiales; f__; g__; s__	0.166667	0.664397	1	2	4	0	0	0	0	0	0	0	0	1
New.CleanUp.ReferenceOTU34057	k__Bacteria; p__Firmicutes; c__Clostridia; o__Clostridiales; f__Clostridiaceae; g__; s__	0.166667	0.664397	1	0	1	1	0	0	0	0	0	0	0	1
New.CleanUp.ReferenceOTU34839	k__Bacteria; p__Firmicutes; c__Clostridia; o__Clostridiales; f__Clostridiaceae; g__; s__	0.166667	0.664397	2	0	2	0	1	0	0	0	0	0	0	1
New.CleanUp.ReferenceOTU34976	k__Bacteria; p__Firmicutes; c__Clostridia; o__Clostridiales; f__; g__; s__	0.166667	0.664397	0	0	0	0	0	1	0	5	0	2	1	0
New.CleanUp.ReferenceOTU35260	k__Bacteria; p__Firmicutes; c__Clostridia; o__Clostridiales; f__Ruminococcaceae; g__; s__	0.166667	0.664397	0	0	3	5	4	0	0	0	0	0	0	3
New.CleanUp.ReferenceOTU35292	k__Bacteria; p__Firmicutes; c__Clostridia; o__Clostridiales; f__Lachnospiraceae; g__; s__	0.166667	0.664397	0	0	0	0	0	0	0	2	1	1	1	0
New.CleanUp.ReferenceOTU35857	k__Bacteria; p__Bacteroidetes; c__Bacteroidia; o__Bacteroidales; f__Porphyromonadaceae; g__Parabacteroides; s__	0.166667	0.664397	0	0	0	0	0	2	2	0	0	1	1	0
New.CleanUp.ReferenceOTU36346	k__Bacteria; p__Firmicutes; c__Clostridia; o__Clostridiales; f__; g__; s__	0.166667	0.664397	0	7	1	1	1	0	0	0	0	1	0	1
New.CleanUp.ReferenceOTU36631	k__Bacteria; p__Firmicutes; c__Clostridia; o__Clostridiales; f__; g__; s__	0.166667	0.664397	0	0	0	0	0	1	0	1	0	1	1	0
New.CleanUp.ReferenceOTU36646	k__Bacteria; p__Firmicutes; c__Clostridia; o__Clostridiales; f__Ruminococcaceae; g__; s__	0.166667	0.664397	0	0	0	0	0	1	0	1	0	1	1	0
New.CleanUp.ReferenceOTU36680	k__Bacteria; p__Bacteroidetes; c__Bacteroidia; o__Bacteroidales; f__Porphyromonadaceae; g__Parabacteroides; s__	0.166667	0.664397	0	0	0	0	0	0	1	1	1	0	1	0
New.CleanUp.ReferenceOTU36783	k__Bacteria; p__Bacteroidetes; c__Bacteroidia; o__Bacteroidales; f__S24-7; g__; s__	0.166667	0.664397	1	0	0	2	1	0	0	0	0	0	0	1
New.CleanUp.ReferenceOTU36874	k__Bacteria; p__Firmicutes; c__Clostridia; o__Clostridiales; f__; g__; s__	0.166667	0.664397	0	0	0	0	0	0	1	1	1	0	1	0
New.CleanUp.ReferenceOTU36965	k__Bacteria; p__Bacteroidetes; c__Bacteroidia; o__Bacteroidales; f__S24-7; g__; s__	0.166667	0.664397	2	1	0	0	1	0	0	0	0	0	0	1
New.CleanUp.ReferenceOTU37078	k__Bacteria; p__Bacteroidetes; c__Bacteroidia; o__Bacteroidales; f__Porphyromonadaceae; g__Parabacteroides; s__	0.166667	0.664397	0	0	5	2	1	0	0	0	0	0	0	1
New.CleanUp.ReferenceOTU37095	k__Bacteria; p__Bacteroidetes; c__Bacteroidia; o__Bacteroidales; f__Porphyromonadaceae; g__Parabacteroides; s__	0.166667	0.664397	0	1	0	0	0	1	1	2	0	1	1	0
New.CleanUp.ReferenceOTU37102	k__Bacteria; p__Firmicutes; c__Clostridia; o__Clostridiales; f__; g__; s__	0.166667	0.664397	14	7	1	0	0	0	0	0	0	0	0	1
New.CleanUp.ReferenceOTU37197	k__Bacteria; p__Firmicutes; c__Clostridia; o__Clostridiales; f__Lachnospiraceae; g__; s__	0.166667	0.664397	0	0	0	0	0	0	0	4	1	1	1	0
New.CleanUp.ReferenceOTU37367	k__Bacteria; p__Bacteroidetes; c__Bacteroidia; o__Bacteroidales; f__S24-7; g__; s__	0.166667	0.664397	0	1	1	0	1	0	0	0	0	0	0	1
New.CleanUp.ReferenceOTU38021	k__Bacteria; p__Bacteroidetes; c__Bacteroidia; o__Bacteroidales; f__Porphyromonadaceae; g__Parabacteroides; s__	0.166667	0.664397	0	0	0	0	0	0	0	1	1	1	1	0
New.CleanUp.ReferenceOTU38360	Unassigned	0.166667	0.664397	0	0	2	4	2	0	0	0	0	0	0	2
New.CleanUp.ReferenceOTU38528	k__Bacteria; p__Firmicutes; c__Clostridia; o__Clostridiales; f__; g__; s__	0.166667	0.664397	0	1	1	0	1	0	0	0	0	0	0	1
New.CleanUp.ReferenceOTU38996	k__Bacteria; p__Bacteroidetes; c__Bacteroidia; o__Bacteroidales; f__S24-7; g__; s__	0.166667	0.664397	0	1	1	0	1	0	0	0	0	0	0	1
New.CleanUp.ReferenceOTU39210	k__Bacteria; p__Firmicutes; c__Clostridia; o__Clostridiales; f__Clostridiaceae; g__; s__	0.166667	0.664397	1	2	4	0	0	0	0	0	0	0	0	1
New.CleanUp.ReferenceOTU39650	k__Bacteria; p__Bacteroidetes; c__Bacteroidia; o__Bacteroidales; f__Porphyromonadaceae; g__Parabacteroides; s__	0.166667	0.664397	1	0	0	1	1	0	0	0	0	0	0	1
New.CleanUp.ReferenceOTU39669	k__Bacteria; p__Firmicutes; c__Clostridia; o__Clostridiales; f__; g__; s__	0.166667	0.664397	1	0	0	0	0	2	0	2	2	0	2	0
New.CleanUp.ReferenceOTU39815	k__Bacteria; p__Firmicutes; c__Clostridia; o__Clostridiales; f__Ruminococcaceae; g__Oscillospira; s__	0.166667	0.664397	0	0	0	0	0	1	0	2	1	0	1	0
New.CleanUp.ReferenceOTU40051	k__Bacteria; p__Bacteroidetes; c__Bacteroidia; o__Bacteroidales; f__S24-7; g__; s__	0.166667	0.664397	0	0	0	0	0	0	0	1	1	1	1	0
New.CleanUp.ReferenceOTU40141	k__Bacteria; p__Firmicutes; c__Erysipelotrichi; o__Erysipelotrichales; f__Erysipelotrichaceae; g__; s__	0.166667	0.664397	0	1	6	0	2	0	0	0	0	0	0	1
New.CleanUp.ReferenceOTU40168	k__Bacteria; p__Firmicutes; c__Clostridia; o__Clostridiales; f__Ruminococcaceae; g__; s__	0.166667	0.664397	0	0	0	0	0	0	1	1	1	0	1	0
New.CleanUp.ReferenceOTU40173	k__Bacteria; p__Firmicutes; c__Clostridia; o__Clostridiales; f__; g__; s__	0.166667	0.664397	0	0	0	0	0	2	2	0	0	1	1	0
New.CleanUp.ReferenceOTU40459	k__Bacteria; p__Firmicutes; c__Clostridia; o__Clostridiales; f__Lachnospiraceae; g__; s__	0.166667	0.664397	0	0	1	4	5	0	0	0	0	0	0	1
New.CleanUp.ReferenceOTU40665	k__Bacteria; p__Deferribacteres; c__Deferribacteres; o__Deferribacterales; f__Deferribacteraceae; g__Mucispirillum; s__schaedleri	0.166667	0.664397	4	2	0	0	1	0	0	0	0	0	0	1
New.CleanUp.ReferenceOTU40767	k__Bacteria; p__Firmicutes; c__Clostridia; o__Clostridiales; f__Ruminococcaceae	0.166667	0.664397	0	2	4	0	1	0	0	0	0	0	0	1
New.CleanUp.ReferenceOTU40784	k__Bacteria; p__Firmicutes; c__Clostridia; o__Clostridiales; f__Ruminococcaceae; g__; s__	0.166667	0.664397	0	0	0	0	0	0	4	4	0	2	2	0
New.CleanUp.ReferenceOTU41042	k__Bacteria; p__Firmicutes; c__Clostridia; o__Clostridiales; f__Lachnospiraceae; g__[Ruminococcus]; s__gnavus	0.166667	0.664397	0	1	3	5	0	0	0	0	0	0	0	1
New.CleanUp.ReferenceOTU41192	k__Bacteria; p__Bacteroidetes; c__Bacteroidia; o__Bacteroidales; f__Porphyromonadaceae; g__Parabacteroides; s__	0.166667	0.664397	0	2	3	3	0	0	0	0	0	1	0	2
New.CleanUp.ReferenceOTU41561	k__Bacteria; p__Firmicutes; c__Clostridia; o__Clostridiales; f__Ruminococcaceae; g__Oscillospira; s__	0.166667	0.664397	0	0	1	0	0	1	0	2	1	1	1	0
New.CleanUp.ReferenceOTU41806	k__Bacteria; p__Verrucomicrobia; c__Verrucomicrobiae; o__Verrucomicrobiales; f__Verrucomicrobiaceae; g__Akkermansia; s__muciniphila	0.166667	0.664397	1	0	1	1	0	0	0	0	0	0	0	1
New.CleanUp.ReferenceOTU42166	k__Bacteria; p__Firmicutes; c__Clostridia; o__Clostridiales; f__; g__; s__	0.166667	0.664397	0	2	1	1	0	0	0	0	0	0	0	1
New.CleanUp.ReferenceOTU42310	k__Bacteria; p__Firmicutes; c__Clostridia; o__Clostridiales; f__; g__; s__	0.166667	0.664397	0	0	0	0	0	1	1	2	0	0	1	0
New.CleanUp.ReferenceOTU42661	k__Bacteria; p__Firmicutes; c__Clostridia; o__Clostridiales; f__; g__; s__	0.166667	0.664397	0	1	1	0	1	0	0	0	0	0	0	1
New.CleanUp.ReferenceOTU43200	k__Bacteria; p__Bacteroidetes; c__Bacteroidia; o__Bacteroidales; f__S24-7; g__; s__	0.166667	0.664397	1	3	0	1	0	0	0	0	0	0	0	1
New.CleanUp.ReferenceOTU43378	k__Bacteria; p__Firmicutes; c__Clostridia; o__Clostridiales; f__; g__; s__	0.166667	0.664397	0	0	0	0	0	0	1	3	0	1	1	0
New.CleanUp.ReferenceOTU43667	k__Bacteria; p__Bacteroidetes; c__Bacteroidia; o__Bacteroidales; f__S24-7; g__; s__	0.166667	0.664397	0	0	0	0	0	2	0	1	1	0	1	0
New.CleanUp.ReferenceOTU44049	k__Bacteria; p__Firmicutes; c__Clostridia; o__Clostridiales; f__; g__; s__	0.166667	0.664397	0	0	1	0	0	4	1	1	0	1	1	0
New.CleanUp.ReferenceOTU44124	k__Bacteria; p__Firmicutes; c__Clostridia; o__Clostridiales; f__Ruminococcaceae; g__Ruminococcus; s__	0.166667	0.664397	0	0	0	0	0	1	0	1	0	2	1	0
New.CleanUp.ReferenceOTU44289	k__Bacteria; p__Firmicutes; c__Clostridia; o__Clostridiales; f__Clostridiaceae; g__; s__	0.166667	0.664397	0	1	0	2	7	0	0	0	0	0	0	1
New.CleanUp.ReferenceOTU4435	k__Bacteria; p__Firmicutes; c__Clostridia; o__Clostridiales; f__; g__; s__	0.166667	0.664397	3	0	1	0	1	0	0	0	0	0	0	1
New.CleanUp.ReferenceOTU4436	k__Bacteria; p__Firmicutes; c__Clostridia; o__Clostridiales; f__; g__; s__	0.166667	0.664397	0	0	1	1	1	0	0	0	0	0	0	1
New.CleanUp.ReferenceOTU45018	k__Bacteria; p__Firmicutes; c__Clostridia; o__Clostridiales; f__Ruminococcaceae; g__; s__	0.166667	0.664397	2	2	0	1	0	0	0	0	0	0	0	1
New.CleanUp.ReferenceOTU45141	k__Bacteria; p__Firmicutes; c__Clostridia; o__Clostridiales; f__Clostridiaceae	0.166667	0.664397	1	1	0	1	0	0	0	0	0	0	0	1
New.CleanUp.ReferenceOTU45198	k__Bacteria; p__Firmicutes; c__Clostridia; o__Clostridiales; f__Ruminococcaceae; g__Ruminococcus; s__	0.166667	0.664397	0	0	0	0	0	1	2	1	0	0	1	0
New.CleanUp.ReferenceOTU45321	k__Bacteria; p__Firmicutes; c__Clostridia; o__Clostridiales; f__Ruminococcaceae; g__; s__	0.166667	0.664397	2	5	1	0	0	0	0	0	0	0	0	1
New.CleanUp.ReferenceOTU45519	k__Bacteria; p__Firmicutes; c__Clostridia; o__Clostridiales; f__Lachnospiraceae; g__[Ruminococcus]; s__gnavus	0.166667	0.664397	0	0	0	0	0	1	0	1	1	0	1	0
New.CleanUp.ReferenceOTU45562	k__Bacteria; p__Firmicutes; c__Clostridia; o__Clostridiales; f__; g__; s__	0.166667	0.664397	1	0	0	0	0	3	0	4	0	2	2	0
New.CleanUp.ReferenceOTU4572	k__Bacteria; p__Firmicutes; c__Clostridia; o__Clostridiales; f__; g__; s__	0.166667	0.664397	0	0	4	1	2	0	0	0	0	0	0	1
New.CleanUp.ReferenceOTU45737	k__Bacteria; p__Firmicutes; c__Clostridia; o__Clostridiales; f__; g__; s__	0.166667	0.664397	1	0	1	1	0	0	0	0	0	0	0	1
New.CleanUp.ReferenceOTU45757	k__Bacteria; p__Firmicutes; c__Clostridia; o__Clostridiales; f__Ruminococcaceae; g__Oscillospira; s__	0.166667	0.664397	0	0	0	0	0	1	0	3	0	2	1	0
New.CleanUp.ReferenceOTU46049	k__Bacteria; p__Firmicutes; c__Clostridia; o__Clostridiales; f__; g__; s__	0.166667	0.664397	1	1	0	0	1	0	0	0	0	0	0	1
New.CleanUp.ReferenceOTU46320	k__Bacteria; p__Firmicutes; c__Clostridia; o__Clostridiales; f__; g__; s__	0.166667	0.664397	2	1	0	1	0	0	0	0	0	0	0	1
New.CleanUp.ReferenceOTU46457	k__Bacteria; p__Firmicutes; c__Clostridia; o__Clostridiales; f__; g__; s__	0.166667	0.664397	0	0	0	0	0	0	1	2	1	0	1	0
New.CleanUp.ReferenceOTU46505	k__Bacteria; p__Bacteroidetes; c__Bacteroidia; o__Bacteroidales; f__Porphyromonadaceae; g__Parabacteroides; s__	0.166667	0.664397	2	0	1	0	1	0	0	0	0	0	0	1
New.CleanUp.ReferenceOTU46701	k__Bacteria; p__Firmicutes; c__Clostridia; o__Clostridiales; f__Ruminococcaceae; g__Oscillospira; s__	0.166667	0.664397	0	0	0	0	0	0	0	2	1	2	1	0
New.CleanUp.ReferenceOTU46777	k__Bacteria; p__Bacteroidetes; c__Bacteroidia; o__Bacteroidales; f__Porphyromonadaceae; g__Parabacteroides; s__	0.166667	0.664397	1	0	1	1	0	0	0	0	0	0	0	1
New.CleanUp.ReferenceOTU47128	k__Bacteria; p__Bacteroidetes; c__Bacteroidia; o__Bacteroidales; f__Porphyromonadaceae; g__Parabacteroides; s__	0.166667	0.664397	1	1	0	1	0	0	0	0	0	0	0	1
New.CleanUp.ReferenceOTU47618	k__Bacteria; p__Firmicutes; c__Clostridia; o__Clostridiales; f__; g__; s__	0.166667	0.664397	0	0	0	0	0	3	0	4	0	1	1	0
New.CleanUp.ReferenceOTU4837	k__Bacteria; p__Firmicutes; c__Clostridia; o__Clostridiales; f__Lachnospiraceae; g__; s__	0.166667	0.664397	0	0	0	0	0	1	1	1	0	0	1	0
New.CleanUp.ReferenceOTU48378	k__Bacteria; p__Firmicutes; c__Clostridia; o__Clostridiales; f__; g__; s__	0.166667	0.664397	0	0	0	0	0	4	0	2	0	3	2	0
New.CleanUp.ReferenceOTU48497	k__Bacteria; p__Firmicutes; c__Clostridia; o__Clostridiales; f__Ruminococcaceae; g__Ruminococcus; s__	0.166667	0.664397	0	0	0	0	0	3	0	1	0	1	1	0
New.CleanUp.ReferenceOTU48713	k__Bacteria; p__Firmicutes; c__Clostridia; o__Clostridiales; f__Clostridiaceae; g__SMB53; s__	0.166667	0.664397	0	0	0	0	0	0	1	0	1	1	1	0
New.CleanUp.ReferenceOTU49334	k__Bacteria; p__Firmicutes; c__Clostridia; o__Clostridiales; f__; g__; s__	0.166667	0.664397	1	2	0	1	0	0	0	0	0	0	0	1
New.CleanUp.ReferenceOTU49340	k__Bacteria; p__Firmicutes; c__Clostridia; o__Clostridiales; f__Lachnospiraceae; g__; s__	0.166667	0.664397	1	1	0	1	0	0	0	0	0	0	0	1
New.CleanUp.ReferenceOTU49491	k__Bacteria; p__Firmicutes; c__Clostridia; o__Clostridiales; f__; g__; s__	0.166667	0.664397	0	0	0	0	0	1	0	3	1	0	1	0
New.CleanUp.ReferenceOTU49789	k__Bacteria; p__Firmicutes; c__Clostridia; o__Clostridiales; f__; g__; s__	0.166667	0.664397	2	0	0	1	1	0	0	0	0	0	0	1
New.CleanUp.ReferenceOTU49907	k__Bacteria; p__Bacteroidetes; c__Bacteroidia; o__Bacteroidales; f__Porphyromonadaceae; g__Parabacteroides; s__	0.166667	0.664397	1	0	0	1	1	0	0	0	0	0	0	1
New.CleanUp.ReferenceOTU50476	k__Bacteria; p__Firmicutes; c__Clostridia; o__Clostridiales; f__Clostridiaceae	0.166667	0.664397	3	0	1	1	0	0	0	0	0	0	0	1
New.CleanUp.ReferenceOTU50488	k__Bacteria; p__Firmicutes; c__Clostridia; o__Clostridiales; f__; g__; s__	0.166667	0.664397	0	0	0	0	0	0	1	1	0	1	1	0
New.CleanUp.ReferenceOTU50552	k__Bacteria; p__Firmicutes; c__Clostridia; o__Clostridiales; f__; g__; s__	0.166667	0.664397	0	1	0	0	0	5	0	2	0	2	2	0
New.CleanUp.ReferenceOTU508	k__Bacteria; p__Firmicutes; c__Clostridia; o__Clostridiales; f__; g__; s__	0.166667	0.664397	7	1	0	1	0	0	0	0	0	0	0	1
New.CleanUp.ReferenceOTU50861	k__Bacteria; p__Firmicutes; c__Clostridia; o__Clostridiales; f__; g__; s__	0.166667	0.664397	0	0	0	0	0	1	0	2	0	1	1	0
New.CleanUp.ReferenceOTU51489	k__Bacteria; p__Firmicutes; c__Clostridia; o__Clostridiales; f__; g__; s__	0.166667	0.664397	2	1	0	1	0	0	0	0	0	0	0	1
New.CleanUp.ReferenceOTU51567	k__Bacteria; p__Firmicutes; c__Clostridia; o__Clostridiales; f__; g__; s__	0.166667	0.664397	0	0	0	0	0	0	1	1	0	1	1	0
New.CleanUp.ReferenceOTU51801	Unassigned	0.166667	0.664397	1	1	0	0	2	0	0	0	0	0	0	1
New.CleanUp.ReferenceOTU5205	k__Bacteria; p__Firmicutes; c__Clostridia; o__Clostridiales; f__; g__; s__	0.166667	0.664397	0	0	0	0	0	0	1	1	2	0	1	0
New.CleanUp.ReferenceOTU52631	k__Bacteria; p__Firmicutes; c__Clostridia; o__Clostridiales; f__; g__; s__	0.166667	0.664397	0	0	0	0	0	0	1	1	2	0	1	0
New.CleanUp.ReferenceOTU52643	k__Bacteria; p__Firmicutes; c__Clostridia; o__Clostridiales; f__; g__; s__	0.166667	0.664397	0	1	1	2	0	0	0	0	0	0	0	1
New.CleanUp.ReferenceOTU52881	k__Bacteria; p__Firmicutes; c__Clostridia; o__Clostridiales; f__Clostridiaceae; g__; s__	0.166667	0.664397	1	0	3	0	5	0	0	0	0	0	0	1
New.CleanUp.ReferenceOTU53405	k__Bacteria; p__Firmicutes; c__Clostridia; o__Clostridiales; f__Ruminococcaceae; g__; s__	0.166667	0.664397	1	4	0	0	1	0	0	0	0	0	0	1
New.CleanUp.ReferenceOTU53582	k__Bacteria; p__Firmicutes; c__Clostridia; o__Clostridiales; f__Ruminococcaceae; g__; s__	0.166667	0.664397	0	2	3	0	1	0	0	0	0	0	0	1
New.CleanUp.ReferenceOTU53585	k__Bacteria; p__Bacteroidetes; c__Bacteroidia; o__Bacteroidales; f__Porphyromonadaceae; g__Parabacteroides; s__	0.166667	0.664397	0	0	0	0	0	0	0	1	1	2	1	0
New.CleanUp.ReferenceOTU54186	k__Bacteria; p__Firmicutes; c__Clostridia; o__Clostridiales; f__; g__; s__	0.166667	0.664397	5	1	2	0	0	0	0	0	0	0	0	1
New.CleanUp.ReferenceOTU54329	k__Bacteria; p__Firmicutes; c__Clostridia; o__Clostridiales; f__Ruminococcaceae; g__; s__	0.166667	0.664397	0	0	0	0	0	3	1	3	0	0	1	0
New.CleanUp.ReferenceOTU54508	k__Bacteria; p__Firmicutes; c__Clostridia; o__Clostridiales; f__Lachnospiraceae; g__[Ruminococcus]; s__gnavus	0.166667	0.664397	0	0	0	0	0	2	1	0	3	0	1	0
New.CleanUp.ReferenceOTU55311	k__Bacteria; p__Firmicutes; c__Clostridia; o__Clostridiales; f__Ruminococcaceae; g__; s__	0.166667	0.664397	0	2	1	1	0	0	0	0	0	0	0	1
New.CleanUp.ReferenceOTU55517	k__Bacteria; p__Firmicutes; c__Clostridia; o__Clostridiales; f__; g__; s__	0.166667	0.664397	0	0	0	1	0	4	0	3	0	2	2	0
New.CleanUp.ReferenceOTU55548	k__Bacteria; p__Firmicutes; c__Clostridia; o__Clostridiales; f__Ruminococcaceae; g__; s__	0.166667	0.664397	0	1	1	2	0	0	0	0	0	0	0	1
New.CleanUp.ReferenceOTU55830	k__Bacteria; p__Firmicutes; c__Clostridia; o__Clostridiales; f__; g__; s__	0.166667	0.664397	0	0	0	0	0	0	0	1	1	1	1	0
New.CleanUp.ReferenceOTU55971	k__Bacteria; p__Firmicutes; c__Clostridia; o__Clostridiales; f__; g__; s__	0.166667	0.664397	0	0	1	0	0	1	0	2	1	1	1	0
New.CleanUp.ReferenceOTU56774	k__Bacteria; p__Firmicutes; c__Clostridia; o__Clostridiales; f__Lachnospiraceae; g__Coprococcus; s__	0.166667	0.664397	1	0	1	1	0	0	0	0	0	0	0	1
New.CleanUp.ReferenceOTU57469	k__Bacteria; p__Firmicutes; c__Clostridia; o__Clostridiales; f__Ruminococcaceae; g__Ruminococcus; s__	0.166667	0.664397	0	0	0	0	0	1	3	2	0	0	1	0
New.CleanUp.ReferenceOTU57887	k__Bacteria; p__Firmicutes; c__Clostridia; o__Clostridiales; f__; g__; s__	0.166667	0.664397	0	2	3	7	0	0	0	0	0	0	0	2
New.CleanUp.ReferenceOTU58051	k__Bacteria; p__Firmicutes; c__Clostridia; o__Clostridiales; f__Lachnospiraceae; g__; s__	0.166667	0.664397	0	3	0	1	1	0	0	0	0	0	0	1
New.CleanUp.ReferenceOTU58149	k__Bacteria; p__Firmicutes; c__Clostridia; o__Clostridiales; f__; g__; s__	0.166667	0.664397	5	11	2	0	0	0	0	0	0	0	0	2
New.CleanUp.ReferenceOTU58150	k__Bacteria; p__Firmicutes; c__Clostridia; o__Clostridiales; f__; g__; s__	0.166667	0.664397	0	0	0	0	0	0	2	2	0	3	2	0
New.CleanUp.ReferenceOTU58239	k__Bacteria; p__Bacteroidetes; c__Bacteroidia; o__Bacteroidales; f__Porphyromonadaceae; g__Parabacteroides; s__	0.166667	0.664397	4	1	0	0	3	0	0	0	0	0	0	1
New.CleanUp.ReferenceOTU58248	k__Bacteria; p__Bacteroidetes; c__Bacteroidia; o__Bacteroidales; f__S24-7; g__; s__	0.166667	0.664397	0	0	0	0	0	1	1	0	0	1	1	0
New.CleanUp.ReferenceOTU58289	k__Bacteria; p__Firmicutes; c__Clostridia; o__Clostridiales; f__Ruminococcaceae; g__; s__	0.166667	0.664397	0	0	0	0	0	0	1	1	0	1	1	0
New.CleanUp.ReferenceOTU58312	k__Bacteria; p__Firmicutes; c__Clostridia; o__Clostridiales; f__[Mogibacteriaceae]; g__; s__	0.166667	0.664397	0	1	2	0	1	0	0	0	0	0	0	1
New.CleanUp.ReferenceOTU58508	k__Bacteria; p__Firmicutes; c__Clostridia; o__Clostridiales; f__Ruminococcaceae; g__Ruminococcus; s__	0.166667	0.664397	0	0	0	0	0	2	2	2	0	0	2	0
New.CleanUp.ReferenceOTU58510	k__Bacteria; p__Firmicutes; c__Clostridia; o__Clostridiales; f__; g__; s__	0.166667	0.664397	0	0	2	2	0	3	1	7	1	2	2	0
New.CleanUp.ReferenceOTU58697	k__Bacteria; p__Firmicutes; c__Clostridia; o__Clostridiales; f__; g__; s__	0.166667	0.664397	0	0	0	0	0	0	0	1	1	1	1	0
New.CleanUp.ReferenceOTU59056	k__Bacteria; p__Firmicutes; c__Clostridia; o__Clostridiales; f__Clostridiaceae; g__; s__	0.166667	0.664397	2	0	2	0	2	0	0	0	0	0	0	2
New.CleanUp.ReferenceOTU5909	k__Bacteria; p__Firmicutes; c__Clostridia; o__Clostridiales; f__; g__; s__	0.166667	0.664397	0	1	1	1	0	0	0	0	0	0	0	1
New.CleanUp.ReferenceOTU5913	k__Bacteria; p__Firmicutes; c__Clostridia; o__Clostridiales; f__Ruminococcaceae; g__; s__	0.166667	0.664397	0	2	1	0	1	0	0	0	0	0	0	1
New.CleanUp.ReferenceOTU5942	k__Bacteria; p__Bacteroidetes; c__Bacteroidia; o__Bacteroidales; f__Porphyromonadaceae; g__Parabacteroides; s__	0.166667	0.664397	0	1	0	1	2	0	0	0	0	0	0	1
New.CleanUp.ReferenceOTU5959	k__Bacteria; p__Bacteroidetes; c__Bacteroidia; o__Bacteroidales; f__S24-7; g__; s__	0.166667	0.664397	1	1	0	0	3	0	0	0	0	0	0	1
New.CleanUp.ReferenceOTU59599	k__Bacteria; p__Firmicutes; c__Clostridia; o__Clostridiales; f__; g__; s__	0.166667	0.664397	1	0	1	1	0	0	0	0	0	0	0	1
New.CleanUp.ReferenceOTU60179	Unassigned	0.166667	0.664397	0	0	0	0	0	0	0	1	1	1	1	0
New.CleanUp.ReferenceOTU60291	k__Bacteria; p__Firmicutes; c__Clostridia; o__Clostridiales; f__; g__; s__	0.166667	0.664397	0	1	1	8	0	0	0	0	0	0	0	1
New.CleanUp.ReferenceOTU60444	k__Bacteria; p__Firmicutes; c__Clostridia; o__Clostridiales; f__; g__; s__	0.166667	0.664397	0	0	0	3	0	4	0	2	1	3	2	0
New.CleanUp.ReferenceOTU60529	k__Bacteria; p__Firmicutes; c__Clostridia; o__Clostridiales; f__Ruminococcaceae; g__Oscillospira; s__	0.166667	0.664397	0	0	0	0	0	1	0	1	0	2	1	0
New.CleanUp.ReferenceOTU60556	k__Bacteria; p__Firmicutes; c__Clostridia; o__Clostridiales; f__; g__; s__	0.166667	0.664397	1	0	1	0	1	0	0	0	0	0	0	1
New.CleanUp.ReferenceOTU60983	k__Bacteria; p__Firmicutes; c__Clostridia; o__Clostridiales; f__Ruminococcaceae; g__; s__	0.166667	0.664397	0	0	0	0	0	3	1	2	0	0	1	0
New.CleanUp.ReferenceOTU60988	k__Bacteria; p__Firmicutes; c__Clostridia; o__Clostridiales; f__Ruminococcaceae; g__; s__	0.166667	0.664397	0	1	0	2	1	0	0	0	0	0	0	1
New.CleanUp.ReferenceOTU61141	k__Bacteria; p__Firmicutes; c__Clostridia; o__Clostridiales; f__; g__; s__	0.166667	0.664397	0	1	1	9	0	0	0	0	0	0	0	1
New.CleanUp.ReferenceOTU6160	k__Bacteria; p__Firmicutes; c__Clostridia; o__Clostridiales; f__; g__; s__	0.166667	0.664397	0	2	0	0	0	2	3	1	0	1	1	0
New.CleanUp.ReferenceOTU61815	k__Bacteria; p__Bacteroidetes; c__Bacteroidia; o__Bacteroidales; f__S24-7; g__; s__	0.166667	0.664397	2	1	0	0	1	0	0	0	0	0	0	1
New.CleanUp.ReferenceOTU62256	k__Bacteria; p__Firmicutes; c__Clostridia; o__Clostridiales; f__; g__; s__	0.166667	0.664397	0	1	0	0	0	4	2	4	0	0	2	0
New.CleanUp.ReferenceOTU62439	k__Bacteria; p__Firmicutes; c__Clostridia; o__Clostridiales; f__Ruminococcaceae; g__; s__	0.166667	0.664397	0	0	0	0	0	1	0	1	1	0	1	0
New.CleanUp.ReferenceOTU62642	k__Bacteria; p__Bacteroidetes; c__Bacteroidia; o__Bacteroidales; f__Porphyromonadaceae; g__Parabacteroides; s__	0.166667	0.664397	0	0	1	1	1	0	0	0	0	0	0	1
New.CleanUp.ReferenceOTU62644	k__Bacteria; p__Bacteroidetes; c__Bacteroidia; o__Bacteroidales; f__Porphyromonadaceae; g__Parabacteroides; s__	0.166667	0.664397	0	0	0	0	0	0	1	0	1	1	1	0
New.CleanUp.ReferenceOTU63270	k__Bacteria; p__Verrucomicrobia; c__Verrucomicrobiae; o__Verrucomicrobiales; f__Verrucomicrobiaceae; g__Akkermansia; s__muciniphila	0.166667	0.664397	1	0	2	0	5	0	0	0	0	0	0	1
New.CleanUp.ReferenceOTU63598	k__Bacteria; p__Firmicutes; c__Clostridia; o__Clostridiales; f__Ruminococcaceae; g__; s__	0.166667	0.664397	2	0	0	0	0	4	0	3	0	3	3	0
New.CleanUp.ReferenceOTU63629	k__Bacteria; p__Firmicutes; c__Clostridia; o__Clostridiales; f__; g__; s__	0.166667	0.664397	0	0	0	0	0	1	0	1	0	1	1	0
New.CleanUp.ReferenceOTU6402	k__Bacteria; p__Bacteroidetes; c__Bacteroidia; o__Bacteroidales; f__S24-7; g__; s__	0.166667	0.664397	2	1	1	0	0	0	0	0	0	0	0	1
New.CleanUp.ReferenceOTU64054	k__Bacteria; p__Firmicutes; c__Clostridia; o__Clostridiales; f__Ruminococcaceae; g__; s__	0.166667	0.664397	0	0	0	0	0	5	0	2	0	4	2	0
New.CleanUp.ReferenceOTU64067	Unassigned	0.166667	0.664397	0	0	0	0	0	0	1	2	2	0	1	0
New.CleanUp.ReferenceOTU64071	k__Bacteria; p__Firmicutes; c__Clostridia; o__Clostridiales; f__Ruminococcaceae; g__; s__	0.166667	0.664397	0	0	0	0	0	2	0	1	0	1	1	0
New.CleanUp.ReferenceOTU64146	k__Bacteria; p__Firmicutes; c__Clostridia; o__Clostridiales; f__Ruminococcaceae; g__; s__	0.166667	0.664397	0	0	0	0	0	1	0	1	0	1	1	0
New.CleanUp.ReferenceOTU64211	k__Bacteria; p__Firmicutes; c__Clostridia; o__Clostridiales; f__Ruminococcaceae; g__; s__	0.166667	0.664397	1	4	3	0	0	0	0	0	0	0	0	1
New.CleanUp.ReferenceOTU64314	k__Bacteria; p__Firmicutes; c__Clostridia; o__Clostridiales; f__; g__; s__	0.166667	0.664397	0	0	0	0	0	5	0	1	0	2	1	0
New.CleanUp.ReferenceOTU64831	k__Bacteria; p__Firmicutes; c__Clostridia; o__Clostridiales; f__Ruminococcaceae; g__Oscillospira; s__	0.166667	0.664397	0	0	0	0	1	3	0	4	0	3	3	0
New.CleanUp.ReferenceOTU6496	k__Bacteria; p__Firmicutes; c__Clostridia; o__Clostridiales; f__; g__; s__	0.166667	0.664397	0	0	0	0	0	4	2	2	0	0	2	0
New.CleanUp.ReferenceOTU65022	k__Bacteria; p__Firmicutes; c__Clostridia; o__Clostridiales; f__Ruminococcaceae; g__Oscillospira; s__	0.166667	0.664397	0	0	0	0	0	0	2	5	1	0	1	0
New.CleanUp.ReferenceOTU65052	k__Bacteria; p__Firmicutes; c__Clostridia; o__Clostridiales; f__Lachnospiraceae; g__; s__	0.166667	0.664397	0	0	0	0	0	0	2	1	0	1	1	0
New.CleanUp.ReferenceOTU65176	k__Bacteria; p__Firmicutes; c__Clostridia; o__Clostridiales; f__; g__; s__	0.166667	0.664397	0	0	0	0	0	1	2	5	0	0	1	0
New.CleanUp.ReferenceOTU65224	k__Bacteria; p__Firmicutes; c__Clostridia; o__Clostridiales; f__Lachnospiraceae; g__[Ruminococcus]; s__gnavus	0.166667	0.664397	0	0	0	0	0	0	1	1	2	0	1	0
New.CleanUp.ReferenceOTU65788	k__Bacteria; p__Firmicutes; c__Clostridia; o__Clostridiales; f__Lachnospiraceae; g__; s__	0.166667	0.664397	1	0	1	1	0	0	0	0	0	0	0	1
New.CleanUp.ReferenceOTU65852	k__Bacteria; p__Firmicutes; c__Clostridia; o__Clostridiales; f__; g__; s__	0.166667	0.664397	0	1	0	1	1	0	0	0	0	0	0	1
New.CleanUp.ReferenceOTU65930	k__Bacteria; p__Bacteroidetes; c__Bacteroidia; o__Bacteroidales; f__Porphyromonadaceae; g__Parabacteroides; s__	0.166667	0.664397	0	0	0	0	0	1	1	1	0	0	1	0
New.CleanUp.ReferenceOTU66264	k__Bacteria; p__Firmicutes; c__Clostridia; o__Clostridiales; f__Lachnospiraceae; g__; s__	0.166667	0.664397	0	1	1	2	0	0	0	0	0	0	0	1
New.CleanUp.ReferenceOTU66314	k__Bacteria; p__Firmicutes; c__Clostridia; o__Clostridiales; f__Lachnospiraceae; g__; s__	0.166667	0.664397	0	0	0	0	0	2	1	1	0	0	1	0
New.CleanUp.ReferenceOTU66955	k__Bacteria; p__Firmicutes; c__Clostridia; o__Clostridiales; f__; g__; s__	0.166667	0.664397	1	1	0	1	0	0	0	0	0	0	0	1
New.CleanUp.ReferenceOTU67100	k__Bacteria; p__Firmicutes; c__Clostridia; o__Clostridiales; f__[Mogibacteriaceae]; g__; s__	0.166667	0.664397	0	1	0	1	1	0	0	0	0	0	0	1
New.CleanUp.ReferenceOTU67128	k__Bacteria; p__Firmicutes; c__Clostridia; o__Clostridiales; f__Ruminococcaceae; g__Oscillospira; s__	0.166667	0.664397	0	0	0	0	0	1	0	2	0	1	1	0
New.CleanUp.ReferenceOTU67732	k__Bacteria; p__Firmicutes; c__Clostridia; o__Clostridiales; f__Lachnospiraceae; g__; s__	0.166667	0.664397	0	0	0	0	0	1	0	3	1	0	1	0
New.CleanUp.ReferenceOTU68413	Unassigned	0.166667	0.664397	0	0	0	0	0	1	1	1	0	0	1	0
New.CleanUp.ReferenceOTU68882	k__Bacteria; p__Actinobacteria; c__Coriobacteriia; o__Coriobacteriales; f__Coriobacteriaceae; g__Adlercreutzia; s__	0.166667	0.664397	0	0	0	0	0	2	0	0	5	1	1	0
New.CleanUp.ReferenceOTU69235	k__Bacteria; p__Firmicutes; c__Clostridia; o__Clostridiales; f__; g__; s__	0.166667	0.664397	0	0	0	0	0	2	0	7	0	1	1	0
New.CleanUp.ReferenceOTU69319	k__Bacteria; p__Firmicutes; c__Clostridia; o__Clostridiales; f__Ruminococcaceae; g__; s__	0.166667	0.664397	0	0	1	7	6	0	0	0	0	0	0	1
New.CleanUp.ReferenceOTU69421	k__Bacteria; p__Verrucomicrobia; c__Verrucomicrobiae; o__Verrucomicrobiales; f__Verrucomicrobiaceae; g__Akkermansia; s__muciniphila	0.166667	0.664397	18	0	1	1	1	0	0	0	0	1	0	1
New.CleanUp.ReferenceOTU69434	k__Bacteria; p__Bacteroidetes; c__Bacteroidia; o__Bacteroidales; f__S24-7; g__; s__	0.166667	0.664397	4	1	1	0	1	0	0	0	0	1	0	1
New.CleanUp.ReferenceOTU69530	k__Bacteria; p__Firmicutes; c__Clostridia; o__Clostridiales; f__Lachnospiraceae; g__; s__	0.166667	0.664397	1	0	3	0	1	0	0	0	0	0	0	1
New.CleanUp.ReferenceOTU69968	k__Bacteria; p__Firmicutes; c__Clostridia; o__Clostridiales; f__; g__; s__	0.166667	0.664397	0	0	0	0	0	1	0	0	2	3	1	0
New.CleanUp.ReferenceOTU70088	k__Bacteria; p__Firmicutes	0.166667	0.664397	0	2	1	1	0	0	0	0	0	0	0	1
New.CleanUp.ReferenceOTU70333	k__Bacteria; p__Firmicutes; c__Clostridia; o__Clostridiales; f__; g__; s__	0.166667	0.664397	0	1	0	1	1	0	0	0	0	0	0	1
New.CleanUp.ReferenceOTU70728	k__Bacteria; p__Firmicutes; c__Clostridia; o__Clostridiales; f__Lachnospiraceae; g__; s__	0.166667	0.664397	0	0	0	0	0	1	0	2	0	7	1	0
New.CleanUp.ReferenceOTU70815	k__Bacteria; p__Firmicutes; c__Erysipelotrichi; o__Erysipelotrichales; f__Erysipelotrichaceae; g__; s__	0.166667	0.664397	0	2	3	0	1	0	0	0	0	0	0	1
New.CleanUp.ReferenceOTU71034	k__Bacteria; p__Firmicutes; c__Clostridia; o__Clostridiales; f__Ruminococcaceae; g__; s__	0.166667	0.664397	0	1	2	1	0	0	0	0	0	0	0	1
New.CleanUp.ReferenceOTU71482	k__Bacteria; p__Bacteroidetes; c__Bacteroidia; o__Bacteroidales; f__Porphyromonadaceae; g__Parabacteroides; s__	0.166667	0.664397	0	1	1	1	0	0	0	0	0	0	0	1
New.CleanUp.ReferenceOTU72282	k__Bacteria; p__Firmicutes; c__Clostridia; o__Clostridiales; f__Clostridiaceae; g__; s__	0.166667	0.664397	0	3	3	1	0	0	0	0	0	0	0	1
New.CleanUp.ReferenceOTU72301	k__Bacteria; p__Firmicutes; c__Clostridia; o__Clostridiales; f__Lachnospiraceae; g__; s__	0.166667	0.664397	1	2	1	0	0	0	0	0	0	0	0	1
New.CleanUp.ReferenceOTU72884	k__Bacteria; p__Firmicutes; c__Clostridia; o__Clostridiales; f__; g__; s__	0.166667	0.664397	0	3	1	1	0	0	0	0	0	0	0	1
New.CleanUp.ReferenceOTU73034	k__Bacteria; p__Firmicutes; c__Clostridia; o__Clostridiales; f__; g__; s__	0.166667	0.664397	0	0	0	0	0	0	1	1	1	0	1	0
New.CleanUp.ReferenceOTU73501	Unassigned	0.166667	0.664397	0	0	0	0	0	1	1	0	0	2	1	0
New.CleanUp.ReferenceOTU73607	k__Bacteria; p__Firmicutes; c__Clostridia; o__Clostridiales; f__; g__; s__	0.166667	0.664397	0	0	0	0	0	1	2	2	0	0	1	0
New.CleanUp.ReferenceOTU73684	k__Bacteria; p__Firmicutes; c__Clostridia; o__Clostridiales; f__; g__; s__	0.166667	0.664397	4	0	0	0	0	13	0	2	1	4	2	0
New.CleanUp.ReferenceOTU7395	k__Bacteria; p__Bacteroidetes; c__Bacteroidia; o__Bacteroidales; f__Porphyromonadaceae; g__Parabacteroides; s__	0.166667	0.664397	0	0	0	0	0	0	0	1	2	1	1	0
New.CleanUp.ReferenceOTU74409	k__Bacteria; p__Bacteroidetes; c__Bacteroidia; o__Bacteroidales; f__S24-7; g__; s__	0.166667	0.664397	1	4	1	0	1	3	0	0	0	0	0	1
New.CleanUp.ReferenceOTU74584	k__Bacteria; p__Firmicutes; c__Clostridia; o__Clostridiales; f__; g__; s__	0.166667	0.664397	0	0	0	0	0	2	1	3	0	0	1	0
New.CleanUp.ReferenceOTU75171	k__Bacteria; p__Firmicutes; c__Clostridia; o__Clostridiales; f__Ruminococcaceae; g__; s__	0.166667	0.664397	0	0	0	0	0	1	0	3	1	0	1	0
New.CleanUp.ReferenceOTU75265	k__Bacteria; p__Firmicutes; c__Clostridia; o__Clostridiales; f__Ruminococcaceae; g__Oscillospira; s__	0.166667	0.664397	0	0	0	0	0	1	1	2	0	0	1	0
New.CleanUp.ReferenceOTU75442	k__Bacteria; p__Firmicutes; c__Clostridia; o__Clostridiales; f__; g__; s__	0.166667	0.664397	0	0	0	0	0	1	0	1	0	1	1	0
New.CleanUp.ReferenceOTU7555	k__Bacteria; p__Firmicutes; c__Clostridia; o__Clostridiales; f__Ruminococcaceae; g__; s__	0.166667	0.664397	0	0	0	0	0	0	6	10	2	0	2	0
New.CleanUp.ReferenceOTU75670	k__Bacteria; p__Firmicutes; c__Bacilli; o__Turicibacterales; f__Turicibacteraceae; g__Turicibacter; s__	0.166667	0.664397	1	2	12	3	0	0	0	0	0	4	0	2
New.CleanUp.ReferenceOTU75738	k__Bacteria; p__Firmicutes; c__Clostridia; o__Clostridiales; f__Ruminococcaceae; g__; s__	0.166667	0.664397	1	0	8	0	2	0	0	0	0	0	0	1
New.CleanUp.ReferenceOTU76125	k__Bacteria; p__Firmicutes; c__Clostridia; o__Clostridiales; f__Ruminococcaceae; g__; s__	0.166667	0.664397	0	0	0	0	0	2	0	0	1	1	1	0
New.CleanUp.ReferenceOTU76195	k__Bacteria; p__Bacteroidetes; c__Bacteroidia; o__Bacteroidales; f__Porphyromonadaceae; g__Parabacteroides; s__	0.166667	0.664397	0	0	0	0	0	1	0	1	0	1	1	0
New.CleanUp.ReferenceOTU76461	k__Bacteria; p__Firmicutes; c__Clostridia; o__Clostridiales; f__Ruminococcaceae; g__Ruminococcus; s__	0.166667	0.664397	0	1	0	1	1	0	0	0	0	0	0	1
New.CleanUp.ReferenceOTU76805	k__Bacteria; p__Bacteroidetes; c__Bacteroidia; o__Bacteroidales; f__S24-7; g__; s__	0.166667	0.664397	0	0	0	0	0	1	1	0	0	1	1	0
New.CleanUp.ReferenceOTU77079	k__Bacteria; p__Firmicutes; c__Clostridia; o__Clostridiales; f__; g__; s__	0.166667	0.664397	0	0	0	0	0	1	0	0	1	1	1	0
New.CleanUp.ReferenceOTU77341	k__Bacteria; p__Firmicutes; c__Clostridia; o__Clostridiales; f__; g__; s__	0.166667	0.664397	0	0	0	0	0	0	2	2	0	2	2	0
New.CleanUp.ReferenceOTU77569	k__Bacteria; p__Verrucomicrobia; c__Verrucomicrobiae; o__Verrucomicrobiales; f__Verrucomicrobiaceae; g__Akkermansia; s__muciniphila	0.166667	0.664397	0	1	1	0	2	0	0	0	0	0	0	1
New.CleanUp.ReferenceOTU77608	k__Bacteria; p__Bacteroidetes; c__Bacteroidia; o__Bacteroidales; f__S24-7; g__; s__	0.166667	0.664397	2	2	0	0	3	0	0	0	0	0	0	2
New.CleanUp.ReferenceOTU77911	k__Bacteria; p__Firmicutes; c__Clostridia; o__Clostridiales; f__Ruminococcaceae; g__Anaerotruncus; s__	0.166667	0.664397	0	0	2	1	1	0	0	0	0	0	0	1
New.CleanUp.ReferenceOTU78318	k__Bacteria; p__Firmicutes; c__Clostridia; o__Clostridiales; f__; g__; s__	0.166667	0.664397	0	6	3	1	0	0	0	0	0	0	0	1
New.CleanUp.ReferenceOTU78683	k__Bacteria; p__Firmicutes; c__Bacilli; o__Lactobacillales; f__Lactobacillaceae; g__Lactobacillus; s__	0.166667	0.664397	0	1	0	0	0	1	0	1	1	3	1	0
New.CleanUp.ReferenceOTU78719	k__Bacteria; p__Firmicutes; c__Clostridia; o__Clostridiales; f__Lachnospiraceae; g__; s__	0.166667	0.664397	0	0	0	0	0	1	0	0	1	2	1	0
New.CleanUp.ReferenceOTU79107	k__Bacteria; p__Bacteroidetes; c__Bacteroidia; o__Bacteroidales; f__Porphyromonadaceae; g__Parabacteroides; s__	0.166667	0.664397	1	0	1	0	1	0	0	0	0	0	0	1
New.CleanUp.ReferenceOTU79292	k__Bacteria; p__Firmicutes; c__Clostridia; o__Clostridiales; f__; g__; s__	0.166667	0.664397	2	1	1	0	1	0	0	0	0	1	0	1
New.CleanUp.ReferenceOTU79612	k__Bacteria; p__Firmicutes; c__Clostridia; o__Clostridiales; f__; g__; s__	0.166667	0.664397	0	2	4	2	0	0	0	0	0	0	0	2
New.CleanUp.ReferenceOTU80100	k__Bacteria; p__Firmicutes; c__Clostridia; o__Clostridiales; f__Clostridiaceae	0.166667	0.664397	5	0	1	0	1	0	0	0	0	0	0	1
New.CleanUp.ReferenceOTU80633	k__Bacteria; p__Firmicutes; c__Clostridia; o__Clostridiales; f__Clostridiaceae	0.166667	0.664397	1	0	3	1	0	0	0	0	0	0	0	1
New.CleanUp.ReferenceOTU81360	k__Bacteria; p__Firmicutes; c__Clostridia; o__Clostridiales; f__Lachnospiraceae; g__; s__	0.166667	0.664397	0	1	1	0	1	0	0	0	0	0	0	1
New.CleanUp.ReferenceOTU82050	k__Bacteria; p__Firmicutes; c__Clostridia; o__Clostridiales; f__; g__; s__	0.166667	0.664397	0	0	0	0	0	0	2	0	2	1	1	0
New.CleanUp.ReferenceOTU82072	k__Bacteria; p__Bacteroidetes; c__Bacteroidia; o__Bacteroidales; f__S24-7; g__; s__	0.166667	0.664397	2	1	0	1	1	1	0	0	0	0	0	1
New.CleanUp.ReferenceOTU82134	k__Bacteria; p__Firmicutes; c__Clostridia; o__Clostridiales; f__; g__; s__	0.166667	0.664397	0	0	0	0	0	0	0	1	1	3	1	0
New.CleanUp.ReferenceOTU82339	k__Bacteria; p__Firmicutes; c__Clostridia; o__Clostridiales; f__Lachnospiraceae; g__; s__	0.166667	0.664397	0	0	0	0	0	1	0	1	0	1	1	0
New.CleanUp.ReferenceOTU82528	k__Bacteria; p__Firmicutes; c__Clostridia; o__Clostridiales; f__; g__; s__	0.166667	0.664397	0	0	0	0	1	4	0	14	3	0	3	0
New.CleanUp.ReferenceOTU83012	Unassigned	0.166667	0.664397	2	4	0	0	1	0	0	0	0	0	0	1
New.CleanUp.ReferenceOTU83130	k__Bacteria; p__Firmicutes; c__Clostridia; o__Clostridiales; f__Ruminococcaceae; g__; s__	0.166667	0.664397	2	2	0	0	1	0	0	0	0	0	0	1
New.CleanUp.ReferenceOTU8320	k__Bacteria; p__Firmicutes; c__Clostridia; o__Clostridiales; f__Ruminococcaceae; g__; s__	0.166667	0.664397	0	0	6	2	2	0	0	0	0	0	0	2
New.CleanUp.ReferenceOTU83351	k__Bacteria; p__Firmicutes; c__Clostridia; o__Clostridiales; f__; g__; s__	0.166667	0.664397	0	1	0	0	0	2	0	8	2	0	2	0
New.CleanUp.ReferenceOTU83568	k__Bacteria; p__Firmicutes; c__Clostridia; o__Clostridiales; f__Lachnospiraceae; g__; s__	0.166667	0.664397	0	0	0	0	0	1	0	0	1	1	1	0
New.CleanUp.ReferenceOTU84527	k__Bacteria; p__Firmicutes; c__Clostridia; o__Clostridiales; f__Clostridiaceae	0.166667	0.664397	1	3	4	0	0	0	0	0	0	0	0	1
New.CleanUp.ReferenceOTU8458	k__Bacteria; p__Firmicutes; c__Clostridia; o__Clostridiales; f__; g__; s__	0.166667	0.664397	1	1	2	0	0	0	0	0	0	0	0	1
New.CleanUp.ReferenceOTU84703	k__Bacteria; p__Firmicutes; c__Clostridia; o__Clostridiales; f__; g__; s__	0.166667	0.664397	4	0	4	0	2	0	0	0	0	0	0	2
New.CleanUp.ReferenceOTU85189	k__Bacteria; p__Verrucomicrobia; c__Verrucomicrobiae; o__Verrucomicrobiales; f__Verrucomicrobiaceae; g__Akkermansia; s__muciniphila	0.166667	0.664397	3	0	3	0	1	0	0	0	0	0	0	1
New.CleanUp.ReferenceOTU8868	k__Bacteria; p__Firmicutes; c__Clostridia; o__Clostridiales; f__; g__; s__	0.166667	0.664397	0	0	0	0	0	0	1	0	1	1	1	0
New.CleanUp.ReferenceOTU9061	k__Bacteria; p__Firmicutes; c__Clostridia; o__Clostridiales; f__Ruminococcaceae; g__; s__	0.166667	0.664397	0	0	0	0	0	2	0	4	0	1	1	0
New.CleanUp.ReferenceOTU918	k__Bacteria; p__Firmicutes; c__Clostridia; o__Clostridiales; f__; g__; s__	0.166667	0.664397	5	1	0	0	1	0	0	0	0	0	0	1
New.CleanUp.ReferenceOTU9930	k__Bacteria; p__Firmicutes; c__Clostridia; o__Clostridiales; f__; g__; s__	0.166667	0.664397	0	0	0	0	0	0	0	1	1	3	1	0
New.ReferenceOTU0	k__Bacteria; p__Firmicutes; c__Clostridia; o__Clostridiales; f__; g__; s__	0.166667	0.664397	2	1	1	0	0	0	0	0	0	0	0	1
New.ReferenceOTU190	k__Bacteria; p__Firmicutes; c__Clostridia; o__Clostridiales; f__; g__; s__	0.166667	0.664397	0	0	0	0	0	2	1	1	0	0	1	0
New.ReferenceOTU232	k__Bacteria; p__Firmicutes; c__Clostridia; o__Clostridiales; f__Ruminococcaceae; g__; s__	0.166667	0.664397	0	0	0	0	0	0	0	3	1	2	1	0
New.ReferenceOTU247	k__Bacteria; p__Bacteroidetes; c__Bacteroidia; o__Bacteroidales; f__Porphyromonadaceae; g__Parabacteroides; s__	0.166667	0.664397	0	0	2	1	1	0	0	0	0	0	0	1
New.ReferenceOTU61	k__Bacteria; p__Firmicutes; c__Clostridia; o__Clostridiales; f__Ruminococcaceae; g__Oscillospira; s__	0.166667	0.664397	0	0	0	0	0	3	0	5	1	0	1	0
New.ReferenceOTU64	k__Bacteria; p__Verrucomicrobia; c__Verrucomicrobiae; o__Verrucomicrobiales; f__Verrucomicrobiaceae; g__Akkermansia; s__muciniphila	0.166667	0.664397	72	48	106	80	66	132	70	85	86	106	86	72
New.ReferenceOTU72	k__Bacteria; p__Firmicutes; c__Clostridia; o__Clostridiales; f__; g__; s__	0.166667	0.664397	4	0	0	0	0	2	1	8	0	2	2	0
New.CleanUp.ReferenceOTU18887	k__Bacteria; p__Firmicutes; c__Clostridia; o__Clostridiales; f__Lachnospiraceae; g__; s__	0.174603	0.693674	2	2	0	0	0	4	1	5	0	3	3	0
New.CleanUp.ReferenceOTU38541	k__Bacteria; p__Bacteroidetes; c__Bacteroidia; o__Bacteroidales; f__Porphyromonadaceae; g__Parabacteroides; s__	0.174603	0.693674	1	4	2	1	2	5	3	4	1	7	4	2
New.ReferenceOTU107	k__Bacteria; p__Firmicutes; c__Clostridia; o__Clostridiales; f__; g__; s__	0.174603	0.693674	4	5	9	10	6	7	6	11	10	10	10	6
New.ReferenceOTU177	k__Bacteria; p__Bacteroidetes; c__Bacteroidia; o__Bacteroidales; f__S24-7; g__; s__	0.174603	0.693674	24	16	9	5	7	8	9	5	0	5	5	9
198753	k__Bacteria; p__Firmicutes; c__Clostridia; o__Clostridiales; f__Ruminococcaceae; g__; s__	0.18254	0.722142	4	9	2	3	2	20	9	11	0	15	11	3
259912	k__Bacteria; p__Firmicutes; c__Clostridia; o__Clostridiales; f__Lachnospiraceae; g__; s__	0.18254	0.722142	0	4	4	2	2	1	0	2	0	1	1	2
293580	k__Bacteria; p__Firmicutes; c__Clostridia; o__Clostridiales; f__Lachnospiraceae; g__; s__	0.18254	0.722142	1	2	0	4	1	4	1	5	3	3	3	1
4442899	k__Bacteria; p__Firmicutes; c__Clostridia; o__Clostridiales; f__; g__; s__	0.18254	0.722142	7	3	10	7	1	10	3	20	10	8	10	7
New.ReferenceOTU78	k__Bacteria; p__Firmicutes; c__Clostridia; o__Clostridiales; f__; g__; s__	0.18254	0.722142	3	0	1	0	1	2	0	8	2	9	2	1
258946	k__Bacteria; p__Firmicutes; c__Clostridia; o__Clostridiales; f__Ruminococcaceae; g__Oscillospira; s__	0.190476	0.736652	8	4	1	2	4	7	4	17	4	8	7	4
New.CleanUp.ReferenceOTU18387	k__Bacteria; p__Firmicutes; c__Clostridia; o__Clostridiales; f__; g__; s__	0.190476	0.736652	2	0	1	2	1	3	0	2	10	12	3	1
New.CleanUp.ReferenceOTU23941	Unassigned	0.190476	0.736652	5	7	8	5	21	5	1	3	5	8	5	7
New.CleanUp.ReferenceOTU26941	k__Bacteria; p__Firmicutes; c__Clostridia; o__Clostridiales; f__Ruminococcaceae; g__Oscillospira; s__	0.190476	0.736652	6	9	6	3	5	2	2	9	3	3	3	6
New.CleanUp.ReferenceOTU42312	k__Bacteria; p__Firmicutes; c__Clostridia; o__Clostridiales; f__Ruminococcaceae	0.190476	0.736652	0	0	2	1	1	2	10	1	2	1	2	1
New.ReferenceOTU16	k__Bacteria; p__Firmicutes; c__Clostridia; o__Clostridiales; f__Ruminococcaceae; g__; s__	0.190476	0.736652	2	1	2	1	36	0	1	2	0	1	1	2
265793	k__Bacteria; p__Firmicutes; c__Clostridia; o__Clostridiales; f__Ruminococcaceae; g__; s__	0.198413	0.736652	34	31	17	54	11	32	9	0	33	9	9	31
268475	k__Bacteria; p__Firmicutes; c__Clostridia; o__Clostridiales; f__Ruminococcaceae; g__Oscillospira; s__	0.198413	0.736652	0	12	2	2	4	8	11	7	5	3	7	2
New.CleanUp.ReferenceOTU16663	k__Bacteria; p__Firmicutes; c__Clostridia; o__Clostridiales; f__Lachnospiraceae; g__[Ruminococcus]; s__gnavus	0.198413	0.736652	0	1	2	1	2	1	1	5	4	3	3	1
New.CleanUp.ReferenceOTU29131	k__Bacteria; p__Bacteroidetes; c__Bacteroidia; o__Bacteroidales; f__Porphyromonadaceae; g__Parabacteroides; s__	0.198413	0.736652	1	1	12	5	2	2	5	3	19	13	5	2
New.CleanUp.ReferenceOTU55082	k__Bacteria; p__Bacteroidetes; c__Bacteroidia; o__Bacteroidales; f__S24-7; g__; s__	0.198413	0.736652	6	4	1	1	3	2	2	1	1	0	1	3
New.CleanUp.ReferenceOTU70653	k__Bacteria; p__Verrucomicrobia; c__Verrucomicrobiae; o__Verrucomicrobiales; f__Verrucomicrobiaceae; g__Akkermansia; s__muciniphila	0.198413	0.736652	0	0	3	1	11	2	14	2	8	7	7	1
260001	k__Bacteria; p__Firmicutes; c__Clostridia; o__Clostridiales; f__; g__; s__	0.206349	0.736652	1	0	0	1	1	7	0	3	1	3	3	1
262428	k__Bacteria; p__Firmicutes; c__Clostridia; o__Clostridiales; f__; g__; s__	0.206349	0.736652	0	0	1	0	0	1	1	1	1	0	1	0
262556	k__Bacteria; p__Firmicutes; c__Clostridia; o__Clostridiales; f__; g__; s__	0.206349	0.736652	15	15	2	8	10	6	21	18	12	19	18	10
263946	k__Bacteria; p__Firmicutes; c__Clostridia; o__Clostridiales; f__Lachnospiraceae; g__[Ruminococcus]; s__gnavus	0.206349	0.736652	0	1	1	0	1	7	1	6	0	5	5	1
273958	k__Bacteria; p__Firmicutes; c__Clostridia; o__Clostridiales; f__; g__; s__	0.206349	0.736652	0	0	0	3	1	0	1	5	4	3	3	0
New.CleanUp.ReferenceOTU10705	k__Bacteria; p__Bacteroidetes; c__Bacteroidia; o__Bacteroidales; f__Porphyromonadaceae; g__Parabacteroides; s__	0.206349	0.736652	0	1	0	0	0	1	1	1	0	1	1	0
New.CleanUp.ReferenceOTU11354	k__Bacteria; p__Bacteroidetes; c__Bacteroidia; o__Bacteroidales; f__Porphyromonadaceae; g__Parabacteroides; s__	0.206349	0.736652	5	1	0	2	3	1	1	0	0	1	1	2
New.CleanUp.ReferenceOTU150	k__Bacteria; p__Bacteroidetes; c__Bacteroidia; o__Bacteroidales; f__S24-7; g__; s__	0.206349	0.736652	1	1	0	1	1	0	0	0	0	1	0	1
New.CleanUp.ReferenceOTU15054	k__Bacteria; p__Firmicutes; c__Clostridia; o__Clostridiales; f__Ruminococcaceae; g__; s__	0.206349	0.736652	3	0	0	0	0	0	1	1	1	1	1	0
New.CleanUp.ReferenceOTU15665	k__Bacteria; p__Bacteroidetes; c__Bacteroidia; o__Bacteroidales; f__Porphyromonadaceae; g__Parabacteroides; s__	0.206349	0.736652	0	1	0	3	0	3	0	5	2	2	2	0
New.CleanUp.ReferenceOTU19496	k__Bacteria; p__Firmicutes; c__Clostridia; o__Clostridiales; f__Ruminococcaceae; g__Ruminococcus; s__	0.206349	0.736652	1	1	1	1	0	0	0	0	0	3	0	1
New.CleanUp.ReferenceOTU26191	k__Bacteria; p__Bacteroidetes; c__Bacteroidia; o__Bacteroidales; f__Porphyromonadaceae; g__Parabacteroides; s__	0.206349	0.736652	1	1	1	1	0	0	0	0	0	2	0	1
New.CleanUp.ReferenceOTU31191	k__Bacteria; p__Firmicutes; c__Clostridia; o__Clostridiales; f__Lachnospiraceae; g__; s__	0.206349	0.736652	0	2	0	0	0	0	1	2	1	2	1	0
New.CleanUp.ReferenceOTU32769	k__Bacteria; p__Bacteroidetes; c__Bacteroidia; o__Bacteroidales; f__Porphyromonadaceae; g__Parabacteroides; s__	0.206349	0.736652	1	0	0	0	0	1	1	0	1	1	1	0
New.CleanUp.ReferenceOTU35195	k__Bacteria; p__Bacteroidetes; c__Bacteroidia; o__Bacteroidales; f__S24-7; g__; s__	0.206349	0.736652	1	1	1	0	1	0	0	0	0	1	0	1
New.CleanUp.ReferenceOTU47425	k__Bacteria; p__Firmicutes; c__Clostridia; o__Clostridiales; f__Ruminococcaceae; g__Oscillospira; s__	0.206349	0.736652	0	2	3	0	0	3	4	5	0	1	3	0
New.CleanUp.ReferenceOTU48001	k__Bacteria; p__Firmicutes; c__Erysipelotrichi; o__Erysipelotrichales; f__Erysipelotrichaceae; g__; s__	0.206349	0.736652	0	1	1	1	1	0	0	0	0	1	0	1
New.CleanUp.ReferenceOTU55617	k__Bacteria; p__Firmicutes; c__Clostridia; o__Clostridiales; f__; g__; s__	0.206349	0.736652	1	1	1	1	0	0	0	1	0	0	0	1
New.CleanUp.ReferenceOTU72555	k__Bacteria; p__Firmicutes; c__Clostridia; o__Clostridiales; f__Ruminococcaceae; g__Oscillospira; s__	0.206349	0.736652	0	1	0	0	2	0	1	4	2	4	2	0
New.CleanUp.ReferenceOTU8158	k__Bacteria; p__Firmicutes; c__Clostridia; o__Clostridiales; f__Ruminococcaceae; g__Oscillospira; s__	0.206349	0.736652	0	1	0	0	0	1	1	1	0	1	1	0
New.ReferenceOTU136	k__Bacteria; p__Firmicutes; c__Clostridia; o__Clostridiales; f__Lachnospiraceae; g__Coprococcus; s__	0.206349	0.736652	1	1	0	1	0	1	0	5	3	2	2	1
New.ReferenceOTU142	k__Bacteria; p__Firmicutes; c__Clostridia; o__Clostridiales; f__Dehalobacteriaceae; g__Dehalobacterium; s__	0.206349	0.736652	19	2	5	15	2	24	8	45	11	7	11	5
New.ReferenceOTU146	k__Bacteria; p__Firmicutes; c__Clostridia; o__Clostridiales; f__Ruminococcaceae; g__Oscillospira; s__	0.206349	0.736652	25	30	5	4	4	47	18	61	12	14	18	5
New.ReferenceOTU249	k__Bacteria; p__Firmicutes; c__Clostridia; o__Clostridiales; f__Dehalobacteriaceae; g__Dehalobacterium; s__	0.206349	0.736652	0	3	0	1	0	4	0	6	2	1	2	0
New.ReferenceOTU68	k__Bacteria; p__Firmicutes; c__Clostridia; o__Clostridiales; f__Ruminococcaceae; g__Oscillospira; s__	0.206349	0.736652	1	1	0	0	2	2	2	2	2	0	2	1
New.CleanUp.ReferenceOTU44899	k__Bacteria; p__Firmicutes; c__Clostridia; o__Clostridiales; f__Ruminococcaceae; g__Oscillospira; s__	0.214286	0.736652	2	1	0	0	1	1	0	3	3	6	3	1
New.CleanUp.ReferenceOTU65969	k__Bacteria; p__Firmicutes; c__Clostridia; o__Clostridiales; f__Lachnospiraceae; g__; s__	0.214286	0.736652	4	7	3	3	0	17	3	9	4	4	4	3
New.CleanUp.ReferenceOTU77720	k__Bacteria; p__Bacteroidetes; c__Bacteroidia; o__Bacteroidales; f__S24-7; g__; s__	0.214286	0.736652	16	22	16	3	23	11	13	7	4	16	11	16
New.CleanUp.ReferenceOTU79380	k__Bacteria; p__Bacteroidetes; c__Bacteroidia; o__Bacteroidales; f__Porphyromonadaceae; g__Parabacteroides; s__	0.214286	0.736652	7	8	1	7	4	5	3	4	2	3	3	7
New.CleanUp.ReferenceOTU79809	k__Bacteria; p__Firmicutes; c__Clostridia; o__Clostridiales; f__Ruminococcaceae; g__Oscillospira; s__	0.214286	0.736652	9	3	6	5	7	2	6	1	6	4	4	6
174824	k__Bacteria; p__Firmicutes; c__Clostridia; o__Clostridiales; f__; g__; s__	0.222222	0.736652	396	1265	58	9	156	257	652	486	710	872	652	156
194269	k__Bacteria; p__Firmicutes; c__Clostridia; o__Clostridiales; f__Ruminococcaceae; g__; s__	0.222222	0.736652	4	7	1	1	0	5	1	9	4	5	5	1
259293	k__Bacteria; p__Bacteroidetes; c__Bacteroidia; o__Bacteroidales; f__S24-7; g__; s__	0.222222	0.736652	19	22	20	8	26	15	18	6	5	24	15	20
259983	k__Bacteria; p__Firmicutes; c__Clostridia; o__Clostridiales; f__Lachnospiraceae; g__[Ruminococcus]; s__gnavus	0.222222	0.736652	1	2	13	7	18	12	25	6	31	16	16	7
263933	k__Bacteria; p__Firmicutes; c__Clostridia; o__Clostridiales; f__Lachnospiraceae; g__; s__	0.222222	0.736652	979	554	199	397	2	886	624	844	475	708	708	397
349459	k__Bacteria; p__Firmicutes; c__Clostridia; o__Clostridiales; f__Ruminococcaceae; g__; s__	0.222222	0.736652	2903	5794	1842	4284	2249	2271	1405	9	3540	1897	1897	2903
3957916	k__Bacteria; p__Firmicutes; c__Clostridia; o__Clostridiales; f__; g__; s__	0.222222	0.736652	1637	2479	1370	1242	856	2993	684	3939	2507	2172	2507	1370
New.CleanUp.ReferenceOTU33408	k__Bacteria; p__Firmicutes; c__Clostridia; o__Clostridiales; f__Ruminococcaceae; g__Ruminococcus; s__	0.222222	0.736652	2	1	0	1	0	4	1	8	0	5	4	1
New.CleanUp.ReferenceOTU46605	Unassigned	0.222222	0.736652	2	1	3	3	4	1	1	0	0	5	1	3
New.CleanUp.ReferenceOTU49139	k__Bacteria; p__Bacteroidetes; c__Bacteroidia; o__Bacteroidales; f__Porphyromonadaceae; g__Parabacteroides; s__	0.222222	0.736652	38	39	52	24	54	57	55	42	36	60	55	39
New.CleanUp.ReferenceOTU75674	k__Bacteria; p__Firmicutes; c__Clostridia; o__Clostridiales; f__Ruminococcaceae	0.222222	0.736652	2	1	0	1	0	3	1	8	0	5	3	1
New.ReferenceOTU240	k__Bacteria; p__Bacteroidetes; c__Bacteroidia; o__Bacteroidales; f__S24-7; g__; s__	0.222222	0.736652	19	13	2	3	11	9	3	1	3	3	3	11
196315	k__Bacteria; p__Firmicutes; c__Clostridia; o__Clostridiales; f__Clostridiaceae; g__SMB53; s__	0.230159	0.736652	1	7	7	14	6	11	1	15	9	29	11	7
303184	k__Bacteria; p__Firmicutes; c__Clostridia; o__Clostridiales; f__; g__; s__	0.230159	0.736652	24	22	29	35	22	19	6	24	7	34	19	24
New.CleanUp.ReferenceOTU65760	k__Bacteria; p__Firmicutes; c__Clostridia; o__Clostridiales; f__Dehalobacteriaceae; g__Dehalobacterium; s__	0.230159	0.736652	9	2	4	7	2	1	3	2	1	7	2	4
174285	k__Bacteria; p__Firmicutes; c__Clostridia; o__Clostridiales; f__; g__; s__	0.238095	0.736652	0	0	4	1	0	3	2	3	9	0	3	0
349372	k__Bacteria; p__Firmicutes; c__Clostridia; o__Clostridiales; f__; g__; s__	0.238095	0.736652	0	0	5	0	1	2	0	8	3	4	3	0
378273	k__Bacteria; p__Firmicutes; c__Clostridia; o__Clostridiales; f__; g__; s__	0.238095	0.736652	2	8	0	1	1	1	0	1	0	0	0	1
4430498	k__Bacteria; p__Firmicutes; c__Clostridia; o__Clostridiales; f__Ruminococcaceae; g__Oscillospira; s__	0.238095	0.736652	0	0	0	1	1	1	6	4	1	0	1	0
New.CleanUp.ReferenceOTU10343	k__Bacteria; p__Firmicutes; c__Clostridia; o__Clostridiales; f__; g__; s__	0.238095	0.736652	3	1	1	3	1	0	0	3	0	1	0	1
New.CleanUp.ReferenceOTU2630	k__Bacteria; p__Firmicutes; c__Clostridia; o__Clostridiales; f__Ruminococcaceae; g__Oscillospira; s__	0.238095	0.736652	1	0	0	3	1	3	1	3	2	1	2	1
New.CleanUp.ReferenceOTU29848	k__Bacteria; p__Firmicutes; c__Clostridia; o__Clostridiales; f__Ruminococcaceae; g__; s__	0.238095	0.736652	1	0	0	2	0	3	1	3	0	1	1	0
New.CleanUp.ReferenceOTU30590	Unassigned	0.238095	0.736652	0	1	5	1	0	2	1	1	4	5	2	1
New.CleanUp.ReferenceOTU31651	k__Bacteria; p__Bacteroidetes; c__Bacteroidia; o__Bacteroidales; f__Porphyromonadaceae; g__Parabacteroides; s__	0.238095	0.736652	1	2	3	1	2	1	6	0	0	1	1	2
New.CleanUp.ReferenceOTU31990	k__Bacteria; p__Firmicutes; c__Bacilli; o__Lactobacillales; f__Lactobacillaceae; g__Lactobacillus; s__	0.238095	0.736652	0	0	1	1	0	1	1	0	4	2	1	0
New.CleanUp.ReferenceOTU32081	k__Bacteria; p__Firmicutes; c__Clostridia; o__Clostridiales; f__Ruminococcaceae; g__; s__	0.238095	0.736652	3	0	0	1	0	1	1	5	4	0	1	0
New.CleanUp.ReferenceOTU34798	k__Bacteria; p__Bacteroidetes; c__Bacteroidia; o__Bacteroidales; f__S24-7; g__; s__	0.238095	0.736652	2	4	3	0	1	1	1	1	0	1	1	2
New.CleanUp.ReferenceOTU39958	k__Bacteria; p__Firmicutes; c__Clostridia; o__Clostridiales; f__Ruminococcaceae; g__; s__	0.238095	0.736652	3	3	2	0	0	6	2	5	1	3	3	2
New.CleanUp.ReferenceOTU42595	k__Bacteria; p__Firmicutes; c__Clostridia; o__Clostridiales; f__Ruminococcaceae; g__; s__	0.238095	0.736652	0	0	1	1	0	1	1	0	7	2	1	0
New.CleanUp.ReferenceOTU4444	k__Bacteria; p__Firmicutes; c__Clostridia; o__Clostridiales; f__Dehalobacteriaceae; g__Dehalobacterium; s__	0.238095	0.736652	1	0	0	0	1	2	1	3	1	0	1	0
New.CleanUp.ReferenceOTU58562	k__Bacteria; p__Firmicutes; c__Clostridia; o__Clostridiales; f__Lachnospiraceae; g__; s__	0.238095	0.736652	3	1	0	1	0	2	1	3	1	2	2	1
New.CleanUp.ReferenceOTU62558	k__Bacteria; p__Bacteroidetes; c__Bacteroidia; o__Bacteroidales; f__S24-7; g__; s__	0.238095	0.736652	12	14	4	1	12	10	10	1	0	4	4	12
New.CleanUp.ReferenceOTU63691	Unassigned	0.238095	0.736652	2	2	6	2	2	4	4	12	1	7	4	2
New.CleanUp.ReferenceOTU64769	k__Bacteria; p__Bacteroidetes; c__Bacteroidia; o__Bacteroidales; f__Porphyromonadaceae; g__Parabacteroides; s__	0.238095	0.736652	1	4	1	0	5	0	1	0	0	1	0	1
New.CleanUp.ReferenceOTU66631	k__Bacteria; p__Firmicutes; c__Clostridia; o__Clostridiales; f__Ruminococcaceae; g__Oscillospira; s__	0.238095	0.736652	2	0	0	1	0	5	0	4	1	1	1	0
New.CleanUp.ReferenceOTU6713	k__Bacteria; p__Bacteroidetes; c__Bacteroidia; o__Bacteroidales; f__Porphyromonadaceae; g__Parabacteroides; s__	0.238095	0.736652	4	7	12	12	12	6	7	7	7	6	7	12
New.CleanUp.ReferenceOTU67843	Unassigned	0.238095	0.736652	1	1	0	0	0	0	1	1	2	3	1	0
New.CleanUp.ReferenceOTU69784	k__Bacteria; p__Firmicutes; c__Clostridia; o__Clostridiales; f__Ruminococcaceae; g__Ruminococcus; s__	0.238095	0.736652	0	0	1	1	0	1	3	3	1	0	1	0
New.CleanUp.ReferenceOTU75409	k__Bacteria; p__Firmicutes; c__Clostridia; o__Clostridiales; f__Ruminococcaceae; g__; s__	0.238095	0.736652	1	0	0	0	1	0	3	2	1	1	1	0
New.CleanUp.ReferenceOTU8309	k__Bacteria; p__Firmicutes; c__Clostridia; o__Clostridiales; f__Ruminococcaceae	0.238095	0.736652	1	0	0	1	0	6	0	1	1	2	1	0
New.CleanUp.ReferenceOTU85077	Unassigned	0.238095	0.736652	1	1	2	2	1	2	0	0	0	1	0	1
New.CleanUp.ReferenceOTU8960	k__Bacteria; p__Firmicutes; c__Clostridia; o__Clostridiales; f__; g__; s__	0.238095	0.736652	0	1	0	0	2	4	1	3	1	0	1	0
New.ReferenceOTU85	k__Bacteria; p__Bacteroidetes; c__Bacteroidia; o__Bacteroidales; f__Porphyromonadaceae; g__Parabacteroides; s__	0.238095	0.736652	1	2	1	0	2	1	0	1	0	0	0	1
179512	k__Bacteria; p__Firmicutes; c__Clostridia; o__Clostridiales; f__Clostridiaceae; g__SMB53; s__	0.246032	0.736652	0	4	0	3	1	3	1	3	4	6	3	1
196194	k__Bacteria; p__Firmicutes; c__Clostridia; o__Clostridiales; f__Ruminococcaceae; g__Oscillospira; s__	0.246032	0.736652	26	15	10	13	2	26	20	22	37	8	22	13
269172	k__Bacteria; p__Firmicutes; c__Clostridia; o__Clostridiales; f__Ruminococcaceae; g__Oscillospira; s__	0.246032	0.736652	0	3	2	6	0	3	9	2	5	3	3	2
271672	k__Bacteria; p__Firmicutes; c__Clostridia; o__Clostridiales; f__Ruminococcaceae; g__Oscillospira; s__	0.246032	0.736652	6	5	2	8	0	2	2	0	3	1	2	5
4045626	k__Bacteria; p__Proteobacteria; c__Gammaproteobacteria; o__Oceanospirillales; f__Halomonadaceae; g__Halomonas; s__	0.246032	0.736652	0	1	6	5	4	3	9	1	7	14	7	4
New.CleanUp.ReferenceOTU21198	k__Bacteria; p__Firmicutes; c__Bacilli; o__Turicibacterales; f__Turicibacteraceae; g__Turicibacter; s__	0.246032	0.736652	4	3	11	2	4	3	0	0	0	15	0	4
New.CleanUp.ReferenceOTU26117	k__Bacteria; p__Bacteroidetes; c__Bacteroidia; o__Bacteroidales; f__S24-7; g__; s__	0.246032	0.736652	8	4	1	0	8	1	2	0	3	0	1	4
New.CleanUp.ReferenceOTU2789	k__Bacteria; p__Firmicutes; c__Clostridia; o__Clostridiales; f__Lachnospiraceae; g__; s__	0.246032	0.736652	3	0	4	2	1	3	2	3	7	4	3	2
New.CleanUp.ReferenceOTU45540	k__Bacteria; p__Firmicutes; c__Clostridia; o__Clostridiales; f__Lachnospiraceae; g__; s__	0.246032	0.736652	12	7	4	2	0	12	3	16	7	7	7	4
New.CleanUp.ReferenceOTU66923	k__Bacteria; p__Firmicutes; c__Clostridia; o__Clostridiales; f__Ruminococcaceae; g__; s__	0.246032	0.736652	1	4	1	3	2	2	0	0	2	1	1	2
New.ReferenceOTU140	Unassigned	0.246032	0.736652	14	6	8	13	10	4	13	5	12	2	5	10
New.ReferenceOTU70	Unassigned	0.246032	0.736652	56	51	74	38	125	38	75	42	27	50	42	56
New.CleanUp.ReferenceOTU1998	k__Bacteria; p__Firmicutes; c__Clostridia; o__Clostridiales; f__Ruminococcaceae; g__Oscillospira; s__	0.253968	0.736652	1	3	0	0	1	2	2	2	2	0	2	1
New.CleanUp.ReferenceOTU7681	k__Bacteria; p__Bacteroidetes; c__Bacteroidia; o__Bacteroidales; f__Porphyromonadaceae; g__Parabacteroides; s__	0.261905	0.736652	2	13	5	3	7	1	2	4	1	9	2	5
265503	k__Bacteria; p__Firmicutes; c__Clostridia; o__Clostridiales; f__Lachnospiraceae; g__[Ruminococcus]; s__gnavus	0.269841	0.736652	3	6	2	3	1	5	4	5	7	2	5	3
334697	k__Bacteria; p__Firmicutes; c__Clostridia; o__Clostridiales; f__; g__; s__	0.269841	0.736652	4	2	0	0	0	2	1	7	0	54	2	0
373909	k__Bacteria; p__Firmicutes; c__Clostridia; o__Clostridiales; f__Ruminococcaceae; g__Oscillospira; s__	0.269841	0.736652	2	1	0	0	0	3	0	2	2	1	2	0
4379247	k__Bacteria; p__Firmicutes; c__Bacilli; o__Lactobacillales; f__Lactobacillaceae; g__Lactobacillus; s__	0.269841	0.736652	0	1	0	3	0	1	0	3	5	2	2	0
New.CleanUp.ReferenceOTU13456	k__Bacteria; p__Firmicutes; c__Clostridia; o__Clostridiales; f__; g__; s__	0.269841	0.736652	2	4	0	0	0	5	2	0	1	7	2	0
New.CleanUp.ReferenceOTU47899	k__Bacteria; p__Firmicutes; c__Clostridia; o__Clostridiales; f__; g__; s__	0.269841	0.736652	3	4	2	2	0	1	0	0	1	3	1	2
New.CleanUp.ReferenceOTU56340	k__Bacteria; p__Bacteroidetes; c__Bacteroidia; o__Bacteroidales; f__Porphyromonadaceae; g__Parabacteroides; s__	0.269841	0.736652	4	2	2	4	3	2	6	5	3	5	5	3
New.CleanUp.ReferenceOTU60141	k__Bacteria; p__Firmicutes; c__Clostridia; o__Clostridiales; f__Ruminococcaceae; g__Oscillospira; s__	0.269841	0.736652	0	1	0	2	0	3	2	2	1	0	2	0
New.CleanUp.ReferenceOTU71505	k__Bacteria; p__Firmicutes; c__Clostridia; o__Clostridiales; f__Ruminococcaceae; g__Oscillospira; s__	0.269841	0.736652	5	2	1	3	0	4	4	2	5	3	4	2
New.CleanUp.ReferenceOTU75405	k__Bacteria; p__Firmicutes; c__Clostridia; o__Clostridiales; f__; g__; s__	0.269841	0.736652	0	3	2	2	1	1	0	0	0	2	0	2
New.ReferenceOTU145	k__Bacteria; p__Firmicutes; c__Clostridia; o__Clostridiales; f__Lachnospiraceae; g__Coprococcus; s__	0.269841	0.736652	1	1	1	4	5	2	1	12	5	5	5	1
724472	k__Bacteria; p__Firmicutes; c__Clostridia; o__Clostridiales; f__Lachnospiraceae; g__Dorea; s__	0.277778	0.736652	21	32	7	8	8	15	20	22	12	40	20	8
New.CleanUp.ReferenceOTU10838	k__Bacteria; p__Firmicutes; c__Bacilli; o__Lactobacillales; f__Lactobacillaceae; g__Lactobacillus; s__	0.277778	0.736652	0	3	8	3	0	6	3	2	31	8	6	3
New.CleanUp.ReferenceOTU31704	Unassigned	0.277778	0.736652	1	1	1	1	4	0	1	3	0	1	1	1
New.CleanUp.ReferenceOTU7634	k__Bacteria; p__Bacteroidetes; c__Bacteroidia; o__Bacteroidales; f__Porphyromonadaceae; g__Parabacteroides; s__	0.277778	0.736652	1	1	0	1	1	1	1	4	5	1	1	1
164788	k__Bacteria; p__Firmicutes; c__Clostridia; o__Clostridiales; f__; g__; s__	0.285714	0.736652	25	4	1	0	0	2	0	0	0	0	0	1
179907	k__Bacteria; p__Firmicutes; c__Clostridia; o__Clostridiales; f__Lachnospiraceae; g__; s__	0.285714	0.736652	0	3	1	3	0	0	0	1	0	0	0	1
180879	k__Bacteria; p__Firmicutes; c__Clostridia; o__Clostridiales; f__Ruminococcaceae; g__Oscillospira; s__	0.285714	0.736652	7	5	8	4	5	19	6	25	3	16	16	5
185294	k__Bacteria; p__Firmicutes; c__Clostridia; o__Clostridiales; f__Lachnospiraceae; g__[Ruminococcus]; s__gnavus	0.285714	0.736652	0	0	0	1	0	0	2	1	0	3	1	0
195189	k__Bacteria; p__Firmicutes; c__Clostridia; o__Clostridiales; f__Lachnospiraceae; g__Coprococcus; s__	0.285714	0.736652	18	109	86	44	4	112	2	1	1	28	2	44
229905	k__Bacteria; p__Firmicutes; c__Clostridia; o__Clostridiales; f__[Mogibacteriaceae]; g__; s__	0.285714	0.736652	0	1	0	0	0	3	0	0	2	1	1	0
259870	k__Bacteria; p__Firmicutes; c__Clostridia; o__Clostridiales; f__; g__; s__	0.285714	0.736652	0	0	0	82	0	1	44	1	0	59	1	0
276044	k__Bacteria; p__Firmicutes; c__Clostridia; o__Clostridiales; f__Ruminococcaceae; g__; s__	0.285714	0.736652	0	1	2	0	3	0	1	0	0	0	0	1
289627	k__Bacteria; p__Firmicutes; c__Bacilli; o__Lactobacillales; f__Lactobacillaceae; g__Lactobacillus; s__	0.285714	0.736652	2	5	4	2	2	2	2	7	15	17	7	2
319454	k__Bacteria; p__Firmicutes; c__Clostridia; o__Clostridiales; f__Lachnospiraceae; g__; s__	0.285714	0.736652	0	0	1	2	2	1	0	0	0	0	0	1
338345	k__Bacteria; p__Firmicutes; c__Clostridia; o__Clostridiales; f__Lachnospiraceae; g__; s__	0.285714	0.736652	0	1	0	0	2	8	5	0	0	22	5	0
3392842	k__Bacteria; p__Firmicutes; c__Clostridia; o__Clostridiales; f__Lachnospiraceae; g__; s__	0.285714	0.736652	0	14	6	5	0	1	0	2	0	0	0	5
343264	k__Bacteria; p__Firmicutes; c__Clostridia; o__Clostridiales; f__; g__; s__	0.285714	0.736652	556	3348	0	43	0	1	0	0	0	1	0	43
345540	k__Bacteria; p__Proteobacteria; c__Gammaproteobacteria; o__Enterobacteriales; f__Enterobacteriaceae; g__; s__	0.285714	0.736652	1	2	0	0	2	0	0	0	1	0	0	1
363731	k__Bacteria; p__Verrucomicrobia; c__Verrucomicrobiae; o__Verrucomicrobiales; f__Verrucomicrobiaceae; g__Akkermansia; s__muciniphila	0.285714	0.736652	12	40	36	27	32	17	30	19	19	30	19	32
376516	k__Bacteria; p__Firmicutes; c__Clostridia; o__Clostridiales; f__; g__; s__	0.285714	0.736652	0	0	0	1	0	1	0	0	3	2	1	0
4408801	k__Bacteria; p__Firmicutes; c__Clostridia; o__Clostridiales; f__Ruminococcaceae; g__Oscillospira; s__	0.285714	0.736652	1	0	0	0	0	0	3	1	2	0	1	0
New.CleanUp.ReferenceOTU10658	k__Bacteria; p__Firmicutes; c__Clostridia; o__Clostridiales; f__; g__; s__	0.285714	0.736652	0	5	2	8	0	0	0	0	0	3	0	2
New.CleanUp.ReferenceOTU11034	k__Bacteria; p__Bacteroidetes; c__Bacteroidia; o__Bacteroidales; f__Porphyromonadaceae; g__Parabacteroides; s__	0.285714	0.736652	34	0	0	1	2	0	0	1	0	0	0	1
New.CleanUp.ReferenceOTU17506	k__Bacteria; p__Bacteroidetes; c__Bacteroidia; o__Bacteroidales; f__S24-7; g__; s__	0.285714	0.736652	7	10	7	1	18	4	8	2	2	6	4	7
New.CleanUp.ReferenceOTU19700	k__Bacteria; p__Firmicutes; c__Clostridia; o__Clostridiales; f__; g__; s__	0.285714	0.736652	0	16	5	0	1	0	0	1	0	0	0	1
New.CleanUp.ReferenceOTU19780	k__Bacteria; p__Firmicutes; c__Clostridia; o__Clostridiales; f__Ruminococcaceae; g__; s__	0.285714	0.736652	1	0	0	0	0	0	0	3	2	1	1	0
New.CleanUp.ReferenceOTU20555	k__Bacteria; p__Firmicutes; c__Clostridia; o__Clostridiales; f__; g__; s__	0.285714	0.736652	0	2	0	0	0	1	0	5	0	3	1	0
New.CleanUp.ReferenceOTU22558	k__Bacteria; p__Firmicutes; c__Clostridia; o__Clostridiales; f__Ruminococcaceae; g__Oscillospira; s__	0.285714	0.736652	0	0	0	1	1	0	0	2	4	2	2	0
New.CleanUp.ReferenceOTU26335	k__Bacteria; p__Firmicutes; c__Clostridia; o__Clostridiales; f__Ruminococcaceae; g__; s__	0.285714	0.736652	2	0	0	1	0	11	0	12	0	4	4	0
New.CleanUp.ReferenceOTU30956	k__Bacteria; p__Firmicutes; c__Clostridia; o__Clostridiales; f__; g__; s__	0.285714	0.736652	0	0	0	1	1	0	3	3	3	0	3	0
New.CleanUp.ReferenceOTU31134	k__Bacteria; p__Firmicutes; c__Clostridia; o__Clostridiales; f__Lachnospiraceae; g__; s__	0.285714	0.736652	3	0	0	0	0	0	2	2	1	1	1	0
New.CleanUp.ReferenceOTU33545	k__Bacteria; p__Firmicutes; c__Clostridia; o__Clostridiales; f__; g__; s__	0.285714	0.736652	0	0	1	0	0	0	2	0	1	2	1	0
New.CleanUp.ReferenceOTU34148	Unassigned	0.285714	0.736652	2	0	1	4	0	0	1	0	0	0	0	1
New.CleanUp.ReferenceOTU36209	k__Bacteria; p__Firmicutes; c__Clostridia; o__Clostridiales; f__Ruminococcaceae; g__; s__	0.285714	0.736652	0	0	0	1	0	0	0	3	1	2	1	0
New.CleanUp.ReferenceOTU3638	k__Bacteria; p__Firmicutes; c__Clostridia; o__Clostridiales; f__; g__; s__	0.285714	0.736652	9	4	0	0	1	0	0	0	0	1	0	1
New.CleanUp.ReferenceOTU41293	k__Bacteria; p__Firmicutes; c__Clostridia; o__Clostridiales; f__Lachnospiraceae; g__Coprococcus; s__	0.285714	0.736652	0	1	0	0	0	2	1	3	0	0	1	0
New.CleanUp.ReferenceOTU42058	k__Bacteria; p__Firmicutes; c__Clostridia; o__Clostridiales; f__Lachnospiraceae; g__; s__	0.285714	0.736652	1	0	0	0	0	0	0	2	3	1	1	0
New.CleanUp.ReferenceOTU42618	k__Bacteria; p__Firmicutes; c__Clostridia; o__Clostridiales; f__; g__; s__	0.285714	0.736652	0	0	1	0	0	2	0	2	0	1	1	0
New.CleanUp.ReferenceOTU47872	k__Bacteria; p__Bacteroidetes; c__Bacteroidia; o__Bacteroidales; f__Porphyromonadaceae; g__Parabacteroides; s__	0.285714	0.736652	0	0	1	0	0	0	0	5	1	2	1	0
New.CleanUp.ReferenceOTU54174	k__Bacteria; p__Firmicutes; c__Clostridia; o__Clostridiales; f__; g__; s__	0.285714	0.736652	0	12	7	0	1	0	0	0	0	3	0	1
New.CleanUp.ReferenceOTU55299	k__Bacteria; p__Firmicutes; c__Bacilli; o__Lactobacillales; f__Lactobacillaceae; g__Lactobacillus; s__	0.285714	0.736652	0	0	0	1	0	0	0	1	3	3	1	0
New.CleanUp.ReferenceOTU55848	k__Bacteria; p__Firmicutes; c__Clostridia; o__Clostridiales; f__; g__; s__	0.285714	0.736652	0	0	4	3	1	0	0	0	0	2	0	1
New.CleanUp.ReferenceOTU56119	k__Bacteria; p__Bacteroidetes; c__Bacteroidia; o__Bacteroidales; f__S24-7; g__; s__	0.285714	0.736652	0	4	0	3	1	0	1	0	0	0	0	1
New.CleanUp.ReferenceOTU57781	k__Bacteria; p__Firmicutes; c__Clostridia; o__Clostridiales; f__Lachnospiraceae; g__; s__	0.285714	0.736652	0	1	0	3	2	0	1	0	0	0	0	1
New.CleanUp.ReferenceOTU58284	k__Bacteria; p__Firmicutes; c__Clostridia; o__Clostridiales; f__; g__; s__	0.285714	0.736652	0	1	0	0	1	4	0	8	0	3	3	0
New.CleanUp.ReferenceOTU59944	k__Bacteria; p__Bacteroidetes; c__Bacteroidia; o__Bacteroidales; f__Porphyromonadaceae; g__Parabacteroides; s__	0.285714	0.736652	0	1	1	2	2	0	0	0	0	4	0	1
New.CleanUp.ReferenceOTU60169	k__Bacteria; p__Firmicutes; c__Clostridia; o__Clostridiales; f__Ruminococcaceae; g__Ruminococcus; s__	0.285714	0.736652	0	1	0	0	1	2	0	0	2	2	2	0
New.CleanUp.ReferenceOTU64173	k__Bacteria; p__Firmicutes; c__Clostridia; o__Clostridiales; f__Ruminococcaceae; g__; s__	0.285714	0.736652	0	1	3	4	0	0	1	0	0	0	0	1
New.CleanUp.ReferenceOTU64635	k__Bacteria; p__Firmicutes; c__Clostridia; o__Clostridiales; f__Ruminococcaceae; g__Oscillospira; s__	0.285714	0.736652	0	2	0	0	0	3	3	0	0	1	1	0
New.CleanUp.ReferenceOTU64714	k__Bacteria; p__Firmicutes; c__Clostridia; o__Clostridiales; f__Ruminococcaceae; g__; s__	0.285714	0.736652	0	1	0	0	0	0	1	2	0	2	1	0
New.CleanUp.ReferenceOTU6571	k__Bacteria; p__Firmicutes; c__Clostridia; o__Clostridiales; f__; g__; s__	0.285714	0.736652	8	49	0	1	0	5	0	0	0	0	0	1
New.CleanUp.ReferenceOTU6724	k__Bacteria; p__Verrucomicrobia; c__Verrucomicrobiae; o__Verrucomicrobiales; f__Verrucomicrobiaceae; g__Akkermansia; s__muciniphila	0.285714	0.736652	0	0	0	1	0	0	0	3	2	1	1	0
New.CleanUp.ReferenceOTU74567	k__Bacteria; p__Firmicutes; c__Clostridia; o__Clostridiales; f__Clostridiaceae; g__; s__	0.285714	0.736652	0	1	0	0	0	3	1	2	0	0	1	0
New.CleanUp.ReferenceOTU78915	k__Bacteria; p__Firmicutes; c__Clostridia; o__Clostridiales; f__; g__; s__	0.285714	0.736652	6	22	0	1	0	3	0	0	0	0	0	1
New.CleanUp.ReferenceOTU81796	k__Bacteria; p__Firmicutes; c__Clostridia; o__Clostridiales; f__Ruminococcaceae; g__Oscillospira; s__	0.285714	0.736652	0	0	0	1	0	0	2	3	0	1	1	0
New.CleanUp.ReferenceOTU8469	k__Bacteria; p__Firmicutes; c__Clostridia; o__Clostridiales; f__Ruminococcaceae; g__Oscillospira; s__	0.285714	0.736652	1	0	0	0	0	0	0	4	2	1	1	0
New.ReferenceOTU199	k__Bacteria; p__Firmicutes; c__Clostridia; o__Clostridiales; f__Ruminococcaceae; g__Oscillospira; s__	0.285714	0.736652	1	0	0	0	0	2	0	1	0	2	1	0
271045	k__Bacteria; p__Firmicutes; c__Clostridia; o__Clostridiales; f__Lachnospiraceae; g__; s__	0.293651	0.736652	6	3	4	11	2	14	2	19	5	11	11	4
New.CleanUp.ReferenceOTU51097	k__Bacteria; p__Firmicutes; c__Clostridia; o__Clostridiales; f__Peptostreptococcaceae; g__; s__	0.293651	0.736652	1	2	12	3	3	7	2	9	4	12	7	3
New.CleanUp.ReferenceOTU61670	k__Bacteria; p__Firmicutes; c__Clostridia; o__Clostridiales; f__Lachnospiraceae; g__; s__	0.293651	0.736652	1	3	3	2	0	5	0	7	2	6	5	2
New.CleanUp.ReferenceOTU7945	k__Bacteria; p__Firmicutes; c__Clostridia; o__Clostridiales; f__Ruminococcaceae; g__Ruminococcus; s__	0.293651	0.736652	2	3	3	0	1	2	0	0	1	1	1	2
189611	k__Bacteria; p__Firmicutes; c__Clostridia; o__Clostridiales; f__Lachnospiraceae; g__Coprococcus; s__	0.301587	0.736652	3	7	2	4	3	4	2	16	24	6	6	3
264429	k__Bacteria; p__Firmicutes; c__Clostridia; o__Clostridiales; f__Ruminococcaceae; g__Oscillospira; s__	0.301587	0.736652	1	3	5	4	3	8	8	8	3	2	8	3
303841	k__Bacteria; p__Firmicutes; c__Clostridia; o__Clostridiales; f__Lachnospiraceae; g__; s__	0.301587	0.736652	3	1	0	0	0	2	0	2	3	2	2	0
New.CleanUp.ReferenceOTU40969	k__Bacteria; p__Verrucomicrobia; c__Verrucomicrobiae; o__Verrucomicrobiales; f__Verrucomicrobiaceae; g__Akkermansia; s__muciniphila	0.301587	0.736652	0	0	8	0	3	3	3	2	3	4	3	0
New.CleanUp.ReferenceOTU61067	k__Bacteria; p__Firmicutes; c__Clostridia; o__Clostridiales; f__Ruminococcaceae; g__Ruminococcus; s__	0.301587	0.736652	5	1	1	4	0	0	0	0	2	2	0	1
New.CleanUp.ReferenceOTU76976	k__Bacteria; p__Firmicutes; c__Clostridia; o__Clostridiales; f__Ruminococcaceae; g__; s__	0.301587	0.736652	10	0	0	2	1	6	1	3	2	7	3	1
189840	k__Bacteria; p__Firmicutes; c__Clostridia; o__Clostridiales; f__Ruminococcaceae; g__; s__	0.309524	0.736652	2322	2406	1376	1721	1043	4284	2258	4995	994	3498	3498	1721
193672	k__Bacteria; p__Firmicutes; c__Clostridia; o__Clostridiales; f__Clostridiaceae; g__; s__	0.309524	0.736652	107	451	630	229	396	202	130	190	169	415	190	396
214919	k__Bacteria; p__Firmicutes; c__Bacilli; o__Turicibacterales; f__Turicibacteraceae; g__Turicibacter; s__	0.309524	0.736652	481	618	1339	500	301	493	18	0	5	1461	18	500
4390754	k__Bacteria; p__Firmicutes; c__Clostridia; o__Clostridiales; f__Lachnospiraceae; g__[Ruminococcus]; s__gnavus	0.309524	0.736652	10	99	61	48	45	33	14	59	40	34	34	48
New.CleanUp.ReferenceOTU12276	k__Bacteria; p__Bacteroidetes; c__Bacteroidia; o__Bacteroidales; f__S24-7; g__; s__	0.309524	0.736652	24	29	13	3	18	25	10	4	0	8	8	18
New.CleanUp.ReferenceOTU15699	k__Bacteria; p__Bacteroidetes; c__Bacteroidia; o__Bacteroidales; f__Porphyromonadaceae; g__Parabacteroides; s__	0.309524	0.736652	4	3	2	2	5	5	3	0	0	1	1	3
New.CleanUp.ReferenceOTU3027	k__Bacteria; p__Firmicutes; c__Clostridia; o__Clostridiales; f__; g__; s__	0.309524	0.736652	0	3	1	0	4	4	1	7	3	1	3	1
406247	k__Bacteria; p__Firmicutes; c__Clostridia; o__Clostridiales; f__; g__; s__	0.31746	0.736652	1	3	1	2	1	1	0	1	0	2	1	1
4454025	k__Bacteria; p__Firmicutes; c__Clostridia; o__Clostridiales; f__Lachnospiraceae; g__; s__	0.31746	0.736652	1	6	1	2	1	1	1	0	0	2	1	1
New.CleanUp.ReferenceOTU50735	k__Bacteria; p__Firmicutes; c__Clostridia; o__Clostridiales; f__Lachnospiraceae; g__; s__	0.325397	0.736652	4	8	4	2	0	11	0	5	5	6	5	4
New.CleanUp.ReferenceOTU81727	k__Bacteria; p__Firmicutes; c__Clostridia; o__Clostridiales; f__Ruminococcaceae; g__; s__	0.325397	0.736652	6	14	2	1	5	7	2	0	1	2	2	5
1107303	k__Bacteria; p__Firmicutes; c__Clostridia; o__Clostridiales; f__; g__; s__	0.333333	0.736652	2	35	11	29	9	16	23	29	92	20	23	11
193829	k__Bacteria; p__Verrucomicrobia; c__Verrucomicrobiae; o__Verrucomicrobiales; f__Verrucomicrobiaceae; g__Akkermansia; s__muciniphila	0.333333	0.736652	26	19	29	28	1684	16	24	26	33	25	25	28
311975	k__Bacteria; p__Firmicutes; c__Clostridia; o__Clostridiales; f__; g__; s__	0.333333	0.736652	4	34	2	2	0	4	0	0	0	2	0	2
332854	k__Bacteria; p__Firmicutes; c__Clostridia; o__Clostridiales; f__; g__; s__	0.333333	0.736652	1	2	0	0	0	0	1	1	3	2	1	0
New.CleanUp.ReferenceOTU397	k__Bacteria; p__Bacteroidetes; c__Bacteroidia; o__Bacteroidales; f__Porphyromonadaceae; g__Parabacteroides; s__	0.333333	0.736652	0	1	8	2	1	1	0	0	0	3	0	1
New.CleanUp.ReferenceOTU48077	k__Bacteria; p__Firmicutes; c__Bacilli; o__Lactobacillales; f__Lactobacillaceae; g__Lactobacillus; s__	0.333333	0.736652	0	0	2	1	0	0	1	1	2	4	1	0
New.CleanUp.ReferenceOTU59510	k__Bacteria; p__Firmicutes; c__Clostridia; o__Clostridiales; f__; g__; s__	0.333333	0.736652	3	2	1	0	0	4	2	1	2	1	2	1
New.CleanUp.ReferenceOTU62270	Unassigned	0.333333	0.736652	2	2	0	1	2	0	0	1	0	2	0	2
New.CleanUp.ReferenceOTU6557	k__Bacteria; p__Firmicutes; c__Clostridia; o__Clostridiales; f__Ruminococcaceae; g__Ruminococcus; s__	0.333333	0.736652	0	1	2	0	0	1	3	0	1	2	1	0
New.CleanUp.ReferenceOTU6577	k__Bacteria; p__Firmicutes; c__Clostridia; o__Clostridiales; f__Lachnospiraceae; g__; s__	0.333333	0.736652	0	0	2	1	0	2	1	1	3	0	1	0
New.CleanUp.ReferenceOTU72208	k__Bacteria; p__Firmicutes; c__Clostridia; o__Clostridiales; f__Ruminococcaceae; g__Oscillospira; s__	0.333333	0.736652	0	2	2	2	0	10	1	7	1	2	2	2
179703	k__Bacteria; p__Firmicutes; c__Clostridia; o__Clostridiales; f__; g__; s__	0.34127	0.736652	7	25	12	42	4	3	0	7	13	20	7	12
185587	k__Bacteria; p__Firmicutes; c__Clostridia; o__Clostridiales; f__Lachnospiraceae; g__; s__	0.34127	0.736652	11	24	8	28	38	19	8	12	10	19	12	24
263899	k__Bacteria; p__Firmicutes; c__Clostridia; o__Clostridiales; f__; g__; s__	0.34127	0.736652	23	69	7	3	5	2	12	15	5	1	5	7
272788	k__Bacteria; p__Firmicutes; c__Clostridia; o__Clostridiales; f__Ruminococcaceae; g__; s__	0.34127	0.736652	6	2	0	3	2	14	5	2	6	2	5	2
356226	k__Bacteria; p__Bacteroidetes; c__Bacteroidia; o__Bacteroidales; f__S24-7; g__; s__	0.349206	0.736652	2	2	2	0	5	1	5	1	1	1	1	2
345582	k__Bacteria; p__Firmicutes; c__Clostridia; o__Clostridiales; f__Ruminococcaceae; g__Oscillospira; s__	0.357143	0.736652	1	9	0	2	2	8	1	5	6	8	6	2
New.CleanUp.ReferenceOTU1201	k__Bacteria; p__Firmicutes; c__Clostridia; o__Clostridiales; f__; g__; s__	0.357143	0.736652	6	6	0	3	3	3	1	4	2	0	2	3
New.CleanUp.ReferenceOTU2268	k__Bacteria; p__Firmicutes; c__Clostridia; o__Clostridiales; f__Ruminococcaceae; g__; s__	0.357143	0.736652	2	6	13	14	7	23	6	20	3	20	20	7
New.CleanUp.ReferenceOTU36857	k__Bacteria; p__Firmicutes; c__Clostridia; o__Clostridiales; f__Ruminococcaceae; g__; s__	0.357143	0.736652	2	3	2	0	0	4	0	13	3	1	3	2
New.CleanUp.ReferenceOTU4976	k__Bacteria; p__Firmicutes; c__Clostridia; o__Clostridiales; f__Ruminococcaceae; g__; s__	0.357143	0.736652	1	0	7	3	14	0	3	0	2	2	2	3
New.CleanUp.ReferenceOTU65798	k__Bacteria; p__Firmicutes; c__Clostridia; o__Clostridiales; f__Ruminococcaceae; g__; s__	0.357143	0.736652	8	27	3	32	12	12	2	0	27	8	8	12
186602	k__Bacteria; p__Firmicutes; c__Clostridia; o__Clostridiales; f__; g__; s__	0.365079	0.736652	1	3	0	0	0	0	3	2	1	2	2	0
188862	k__Bacteria; p__Firmicutes; c__Clostridia; o__Clostridiales; f__Ruminococcaceae; g__Oscillospira; s__	0.365079	0.736652	1	3	0	0	0	0	1	2	3	2	2	0
356148	k__Bacteria; p__Firmicutes; c__Clostridia; o__Clostridiales; f__Lachnospiraceae; g__; s__	0.365079	0.736652	9	1	0	3	2	2	2	37	2	10	2	2
91557	k__Bacteria; p__Proteobacteria; c__Gammaproteobacteria; o__Enterobacteriales; f__Enterobacteriaceae; g__; s__	0.365079	0.736652	1	6	0	1	1	1	1	0	0	0	0	1
New.CleanUp.ReferenceOTU11666	k__Bacteria; p__Bacteroidetes; c__Bacteroidia; o__Bacteroidales; f__Porphyromonadaceae; g__Parabacteroides; s__	0.365079	0.736652	0	1	0	1	0	0	1	2	1	1	1	0
New.CleanUp.ReferenceOTU17602	k__Bacteria; p__Firmicutes; c__Bacilli; o__Lactobacillales; f__Lactobacillaceae; g__Lactobacillus; s__	0.365079	0.736652	0	1	5	0	0	1	2	0	5	3	2	0
New.CleanUp.ReferenceOTU19649	k__Bacteria; p__Firmicutes; c__Clostridia; o__Clostridiales; f__Ruminococcaceae; g__; s__	0.365079	0.736652	2	0	2	2	3	0	1	0	2	2	1	2
New.CleanUp.ReferenceOTU27411	k__Bacteria; p__Firmicutes; c__Clostridia; o__Clostridiales; f__; g__; s__	0.365079	0.736652	0	0	0	1	2	0	4	0	4	2	2	0
New.CleanUp.ReferenceOTU27665	k__Bacteria; p__Bacteroidetes; c__Bacteroidia; o__Bacteroidales; f__Porphyromonadaceae; g__Parabacteroides; s__	0.365079	0.736652	1	2	0	1	1	1	1	0	0	0	0	1
New.CleanUp.ReferenceOTU30300	k__Bacteria; p__Firmicutes; c__Clostridia; o__Clostridiales; f__; g__; s__	0.365079	0.736652	1	2	0	2	3	0	0	1	5	0	0	2
New.CleanUp.ReferenceOTU31912	k__Bacteria; p__Firmicutes; c__Clostridia; o__Clostridiales; f__Lachnospiraceae; g__; s__	0.365079	0.736652	2	3	0	0	0	5	1	2	0	3	2	0
New.CleanUp.ReferenceOTU33064	k__Bacteria; p__Firmicutes; c__Clostridia; o__Clostridiales; f__; g__; s__	0.365079	0.736652	0	4	1	0	0	1	3	2	2	0	2	0
New.CleanUp.ReferenceOTU35394	k__Bacteria; p__Bacteroidetes; c__Bacteroidia; o__Bacteroidales; f__Porphyromonadaceae; g__Parabacteroides; s__	0.365079	0.736652	0	0	3	4	2	0	0	0	2	1	0	2
New.CleanUp.ReferenceOTU47076	k__Bacteria; p__Firmicutes; c__Clostridia; o__Clostridiales; f__Ruminococcaceae; g__; s__	0.365079	0.736652	1	4	2	2	0	4	1	0	0	0	0	2
New.CleanUp.ReferenceOTU63782	k__Bacteria; p__Firmicutes; c__Clostridia; o__Clostridiales; f__Lachnospiraceae; g__; s__	0.365079	0.736652	5	3	0	2	0	2	1	0	0	0	0	2
New.CleanUp.ReferenceOTU65175	k__Bacteria; p__Firmicutes; c__Clostridia; o__Clostridiales; f__Lachnospiraceae; g__[Ruminococcus]; s__gnavus	0.365079	0.736652	0	0	2	3	0	2	0	5	1	3	2	0
New.CleanUp.ReferenceOTU65938	Unassigned	0.365079	0.736652	0	1	0	1	0	1	0	1	1	2	1	0
New.CleanUp.ReferenceOTU67690	k__Bacteria; p__Firmicutes; c__Clostridia; o__Clostridiales; f__; g__; s__	0.365079	0.736652	0	2	0	0	1	1	1	1	5	0	1	0
New.CleanUp.ReferenceOTU69863	k__Bacteria; p__Firmicutes; c__Clostridia; o__Clostridiales; f__Clostridiaceae; g__; s__	0.365079	0.736652	0	2	0	0	1	1	1	1	3	0	1	0
New.CleanUp.ReferenceOTU80174	k__Bacteria; p__Firmicutes; c__Clostridia; o__Clostridiales; f__Lachnospiraceae; g__; s__	0.365079	0.736652	0	1	0	1	0	3	1	1	0	1	1	0
New.CleanUp.ReferenceOTU83586	k__Bacteria; p__Bacteroidetes; c__Bacteroidia; o__Bacteroidales; f__S24-7; g__; s__	0.365079	0.736652	1	3	1	1	0	0	0	1	1	0	0	1
New.ReferenceOTU157	k__Bacteria; p__Firmicutes; c__Clostridia; o__Clostridiales; f__Ruminococcaceae; g__; s__	0.365079	0.736652	2	2	1	1	2	1	1	0	5	1	1	2
New.ReferenceOTU242	k__Bacteria; p__Firmicutes; c__Clostridia; o__Clostridiales; f__Ruminococcaceae; g__; s__	0.365079	0.736652	0	0	4	2	11	2	1	0	0	0	0	2
182837	k__Bacteria; p__Firmicutes; c__Clostridia; o__Clostridiales; f__Ruminococcaceae; g__; s__	0.373016	0.736652	2	1	0	2	0	1	0	7	2	4	2	1
New.CleanUp.ReferenceOTU52981	k__Bacteria; p__Firmicutes; c__Clostridia; o__Clostridiales; f__; g__; s__	0.373016	0.736652	1	1	3	0	0	2	1	3	4	0	2	1
New.ReferenceOTU19	k__Bacteria; p__Firmicutes; c__Clostridia; o__Clostridiales; f__; g__; s__	0.373016	0.736652	2	5	3	0	0	4	1	13	2	4	4	2
190273	k__Bacteria; p__Firmicutes; c__Clostridia; o__Clostridiales; f__Lachnospiraceae; g__; s__	0.380952	0.736652	38	33	33	36	11	48	14	61	27	64	48	33
264225	k__Bacteria; p__Firmicutes; c__Clostridia; o__Clostridiales; f__; g__; s__	0.380952	0.736652	29	89	28	61	40	55	43	42	178	55	55	40
265106	k__Bacteria; p__Actinobacteria; c__Coriobacteriia; o__Coriobacteriales; f__Coriobacteriaceae; g__Adlercreutzia; s__	0.380952	0.736652	2	8	2	1	0	3	0	1	0	1	1	2
277588	k__Bacteria; p__Firmicutes; c__Clostridia; o__Clostridiales; f__Ruminococcaceae; g__Oscillospira; s__	0.380952	0.736652	14	22	4	2	2	30	10	8	6	9	9	4
New.CleanUp.ReferenceOTU19327	k__Bacteria; p__Firmicutes; c__Clostridia; o__Clostridiales; f__Ruminococcaceae; g__Ruminococcus; s__	0.380952	0.736652	1	1	0	1	0	4	0	3	0	3	3	1
New.CleanUp.ReferenceOTU22089	k__Bacteria; p__Bacteroidetes; c__Bacteroidia; o__Bacteroidales; f__S24-7; g__; s__	0.380952	0.736652	1	3	0	1	3	2	1	0	1	0	1	1
New.CleanUp.ReferenceOTU26380	k__Bacteria; p__Bacteroidetes; c__Bacteroidia; o__Bacteroidales; f__Porphyromonadaceae; g__Parabacteroides; s__	0.380952	0.736652	0	1	0	1	1	0	0	3	2	4	2	1
New.CleanUp.ReferenceOTU60500	k__Bacteria; p__Firmicutes; c__Clostridia; o__Clostridiales; f__Ruminococcaceae; g__Ruminococcus; s__	0.380952	0.736652	0	1	0	1	2	1	2	4	0	2	2	1
New.CleanUp.ReferenceOTU69346	k__Bacteria; p__Firmicutes; c__Bacilli; o__Lactobacillales; f__Lactobacillaceae; g__Lactobacillus; s__	0.380952	0.736652	0	1	5	1	0	3	0	1	3	6	3	1
New.ReferenceOTU50	Unassigned	0.380952	0.736652	0	4	4	1	9	1	1	0	4	0	1	4
260741	k__Bacteria; p__Firmicutes; c__Clostridia; o__Clostridiales; f__Ruminococcaceae; g__Oscillospira; s__	0.388889	0.736652	4	10	1	1	4	12	3	11	1	5	5	4
274016	k__Bacteria; p__Firmicutes; c__Bacilli; o__Lactobacillales; f__Lactobacillaceae; g__Lactobacillus; s__	0.388889	0.736652	0	1	3	1	0	1	1	0	7	6	1	1
276509	k__Bacteria; p__Bacteroidetes; c__Bacteroidia; o__Bacteroidales; f__S24-7; g__; s__	0.388889	0.736652	17	31	13	1	23	9	18	3	3	14	9	17
4306202	k__Bacteria; p__Proteobacteria; c__Gammaproteobacteria; o__Oceanospirillales; f__Halomonadaceae; g__Halomonas; s__campisalis	0.388889	0.736652	1	2	2	3	1	2	4	1	7	2	2	2
New.CleanUp.ReferenceOTU68883	k__Bacteria; p__Bacteroidetes; c__Bacteroidia; o__Bacteroidales; f__Porphyromonadaceae; g__Parabacteroides; s__	0.388889	0.736652	3	4	1	1	0	1	1	0	0	2	1	1
New.ReferenceOTU261	k__Bacteria; p__Firmicutes; c__Clostridia; o__Clostridiales; f__; g__; s__	0.388889	0.736652	7	5	1	5	2	16	1	12	2	14	12	5
185723	k__Bacteria; p__Bacteroidetes; c__Bacteroidia; o__Bacteroidales; f__S24-7; g__; s__	0.396825	0.736652	3	5	3	1	7	4	2	2	0	4	2	3
187222	k__Bacteria; p__Firmicutes; c__Clostridia; o__Clostridiales; f__; g__; s__	0.396825	0.736652	14	6	1	0	1	1	0	1	0	1	1	1
189843	k__Bacteria; p__Firmicutes; c__Clostridia; o__Clostridiales; f__; g__; s__	0.396825	0.736652	3	3	3	5	0	7	0	7	4	3	4	3
263977	k__Bacteria; p__Firmicutes; c__Clostridia; o__Clostridiales; f__Ruminococcaceae; g__; s__	0.396825	0.736652	32	45	8	12	12	29	3	1	4	50	4	12
4356342	k__Bacteria; p__Firmicutes; c__Clostridia; o__Clostridiales; f__Lachnospiraceae; g__[Ruminococcus]; s__gnavus	0.396825	0.736652	0	4	1	14	7	6	9	6	5	8	6	4
New.CleanUp.ReferenceOTU11230	k__Bacteria; p__Firmicutes; c__Clostridia; o__Clostridiales; f__Ruminococcaceae; g__Oscillospira; s__	0.396825	0.736652	1	3	2	1	1	6	0	1	0	1	1	1
New.CleanUp.ReferenceOTU38704	k__Bacteria; p__Verrucomicrobia; c__Verrucomicrobiae; o__Verrucomicrobiales; f__Verrucomicrobiaceae; g__Akkermansia; s__muciniphila	0.396825	0.736652	1	0	0	1	1	1	2	1	0	2	1	1
New.CleanUp.ReferenceOTU40743	k__Bacteria; p__Firmicutes; c__Clostridia; o__Clostridiales; f__; g__; s__	0.396825	0.736652	0	1	1	0	1	1	1	2	2	0	1	1
New.CleanUp.ReferenceOTU44218	k__Bacteria; p__Firmicutes; c__Clostridia; o__Clostridiales; f__Peptostreptococcaceae; g__; s__	0.396825	0.736652	0	4	1	1	2	0	1	1	0	1	1	1
New.CleanUp.ReferenceOTU56331	k__Bacteria; p__Firmicutes; c__Clostridia; o__Clostridiales; f__; g__; s__	0.396825	0.736652	0	1	0	1	3	1	1	1	3	2	1	1
New.CleanUp.ReferenceOTU66581	k__Bacteria; p__Firmicutes; c__Clostridia; o__Clostridiales; f__Ruminococcaceae; g__Ruminococcus; s__	0.396825	0.736652	0	2	1	1	1	0	3	4	1	2	2	1
New.CleanUp.ReferenceOTU76221	k__Bacteria; p__Verrucomicrobia; c__Verrucomicrobiae; o__Verrucomicrobiales; f__Verrucomicrobiaceae; g__Akkermansia; s__muciniphila	0.396825	0.736652	1	5	8	3	5	5	4	5	6	9	5	5
New.CleanUp.ReferenceOTU80590	k__Bacteria; p__Firmicutes; c__Clostridia; o__Clostridiales; f__Ruminococcaceae; g__Oscillospira; s__	0.396825	0.736652	1	2	1	1	0	1	3	2	0	3	2	1
171079	k__Bacteria; p__Firmicutes; c__Clostridia; o__Clostridiales; f__Ruminococcaceae; g__Ruminococcus; s__	0.404762	0.736652	0	0	0	0	1	1	0	0	3	1	1	0
190219	k__Bacteria; p__Firmicutes; c__Clostridia; o__Clostridiales; f__; g__; s__	0.404762	0.736652	0	3	1	1	0	0	0	1	0	0	0	1
196571	k__Bacteria; p__Firmicutes; c__Clostridia; o__Clostridiales; f__; g__; s__	0.404762	0.736652	20	59	0	5	0	28	0	0	0	0	0	5
198170	k__Bacteria; p__Firmicutes; c__Clostridia; o__Clostridiales; f__Ruminococcaceae; g__; s__	0.404762	0.736652	0	0	0	0	1	0	0	1	1	2	1	0
262060	k__Bacteria; p__Firmicutes; c__Clostridia; o__Clostridiales; f__Clostridiaceae; g__; s__	0.404762	0.736652	0	3	0	0	0	1	0	1	0	4	1	0
302932	k__Bacteria; p__Firmicutes; c__Clostridia; o__Clostridiales; f__Clostridiaceae; g__; s__	0.404762	0.736652	0	0	2	0	0	2	0	0	4	1	1	0
New.CleanUp.ReferenceOTU10244	k__Bacteria; p__Bacteroidetes; c__Bacteroidia; o__Bacteroidales; f__Porphyromonadaceae; g__Parabacteroides; s__	0.404762	0.736652	0	0	0	1	0	1	0	1	2	0	1	0
New.CleanUp.ReferenceOTU10604	k__Bacteria; p__Bacteroidetes; c__Bacteroidia; o__Bacteroidales; f__S24-7; g__; s__	0.404762	0.736652	0	2	1	0	1	1	0	0	0	0	0	1
New.CleanUp.ReferenceOTU11051	k__Bacteria; p__Firmicutes; c__Clostridia; o__Clostridiales; f__Ruminococcaceae; g__Oscillospira; s__	0.404762	0.736652	0	0	1	0	0	0	0	1	2	1	1	0
New.CleanUp.ReferenceOTU11233	k__Bacteria; p__Firmicutes; c__Clostridia; o__Clostridiales; f__Ruminococcaceae; g__Oscillospira; s__	0.404762	0.736652	0	3	2	0	1	0	0	2	0	0	0	1
New.CleanUp.ReferenceOTU1211	k__Bacteria; p__Firmicutes; c__Clostridia; o__Clostridiales; f__; g__; s__	0.404762	0.736652	1	4	0	1	0	0	0	0	0	3	0	1
New.CleanUp.ReferenceOTU13268	k__Bacteria; p__Firmicutes; c__Clostridia; o__Clostridiales; f__; g__; s__	0.404762	0.736652	0	0	0	0	3	1	2	4	0	0	1	0
New.CleanUp.ReferenceOTU18801	k__Bacteria; p__Firmicutes; c__Clostridia; o__Clostridiales; f__Ruminococcaceae; g__Oscillospira; s__	0.404762	0.736652	0	1	0	0	0	2	0	0	1	1	1	0
New.CleanUp.ReferenceOTU19791	k__Bacteria; p__Firmicutes; c__Clostridia; o__Clostridiales; f__Lachnospiraceae; g__; s__	0.404762	0.736652	1	0	0	0	0	1	0	1	3	0	1	0
New.CleanUp.ReferenceOTU20503	k__Bacteria; p__Bacteroidetes; c__Bacteroidia; o__Bacteroidales; f__Porphyromonadaceae; g__Parabacteroides; s__	0.404762	0.736652	0	0	0	0	1	2	0	1	0	1	1	0
New.CleanUp.ReferenceOTU22574	k__Bacteria; p__Firmicutes; c__Clostridia; o__Clostridiales; f__; g__; s__	0.404762	0.736652	3	0	0	0	0	4	0	0	1	1	1	0
New.CleanUp.ReferenceOTU28137	k__Bacteria; p__Firmicutes; c__Erysipelotrichi; o__Erysipelotrichales; f__Erysipelotrichaceae; g__Clostridium	0.404762	0.736652	0	0	0	0	1	0	1	0	1	2	1	0
New.CleanUp.ReferenceOTU30573	k__Bacteria; p__Firmicutes; c__Clostridia; o__Clostridiales; f__Lachnospiraceae; g__[Ruminococcus]; s__gnavus	0.404762	0.736652	0	0	1	0	0	1	0	0	1	2	1	0
New.CleanUp.ReferenceOTU31203	Unassigned	0.404762	0.736652	0	0	1	0	0	2	1	1	0	0	1	0
New.CleanUp.ReferenceOTU33882	k__Bacteria; p__Bacteroidetes; c__Bacteroidia; o__Bacteroidales; f__S24-7; g__; s__	0.404762	0.736652	1	2	1	0	0	0	1	0	0	0	0	1
New.CleanUp.ReferenceOTU36222	k__Bacteria; p__Firmicutes; c__Clostridia; o__Clostridiales; f__Ruminococcaceae; g__; s__	0.404762	0.736652	0	0	0	2	0	0	0	3	1	1	1	0
New.CleanUp.ReferenceOTU37359	k__Bacteria; p__Firmicutes; c__Clostridia; o__Clostridiales; f__; g__; s__	0.404762	0.736652	1	0	0	0	0	1	2	1	0	0	1	0
New.CleanUp.ReferenceOTU37638	k__Bacteria; p__Firmicutes; c__Clostridia; o__Clostridiales; f__Ruminococcaceae; g__Oscillospira; s__	0.404762	0.736652	0	0	0	0	4	4	6	1	0	0	1	0
New.CleanUp.ReferenceOTU40924	k__Bacteria; p__Firmicutes; c__Clostridia; o__Clostridiales; f__Ruminococcaceae; g__Ruminococcus; s__	0.404762	0.736652	0	1	0	0	0	0	2	1	1	0	1	0
New.CleanUp.ReferenceOTU42165	k__Bacteria; p__Firmicutes; c__Clostridia; o__Clostridiales; f__; g__; s__	0.404762	0.736652	0	0	1	0	0	0	0	1	1	3	1	0
New.CleanUp.ReferenceOTU44038	k__Bacteria; p__Firmicutes; c__Clostridia; o__Clostridiales; f__Ruminococcaceae; g__Oscillospira; s__	0.404762	0.736652	1	0	0	0	0	1	0	2	1	0	1	0
New.CleanUp.ReferenceOTU46111	k__Bacteria; p__Firmicutes; c__Clostridia; o__Clostridiales; f__Ruminococcaceae; g__; s__	0.404762	0.736652	0	0	0	1	0	0	0	3	1	1	1	0
New.CleanUp.ReferenceOTU46600	k__Bacteria; p__Verrucomicrobia; c__Verrucomicrobiae; o__Verrucomicrobiales; f__Verrucomicrobiaceae; g__Akkermansia; s__muciniphila	0.404762	0.736652	0	0	1	2	3	0	0	2	0	0	0	1
New.CleanUp.ReferenceOTU5301	k__Bacteria; p__Firmicutes; c__Clostridia; o__Clostridiales; f__Ruminococcaceae; g__; s__	0.404762	0.736652	0	0	1	0	0	1	0	2	1	0	1	0
New.CleanUp.ReferenceOTU53440	k__Bacteria; p__Bacteroidetes; c__Bacteroidia; o__Bacteroidales; f__Porphyromonadaceae; g__Parabacteroides; s__	0.404762	0.736652	0	0	1	0	0	0	1	1	2	0	1	0
New.CleanUp.ReferenceOTU53592	k__Bacteria; p__Firmicutes; c__Clostridia; o__Clostridiales; f__; g__; s__	0.404762	0.736652	8	111	0	3	0	36	0	0	0	0	0	3
New.CleanUp.ReferenceOTU54282	k__Bacteria; p__Bacteroidetes; c__Bacteroidia; o__Bacteroidales; f__Porphyromonadaceae; g__Parabacteroides; s__	0.404762	0.736652	1	0	1	2	0	0	0	0	0	1	0	1
New.CleanUp.ReferenceOTU55373	k__Bacteria; p__Verrucomicrobia; c__Verrucomicrobiae; o__Verrucomicrobiales; f__Verrucomicrobiaceae; g__Akkermansia; s__muciniphila	0.404762	0.736652	0	0	1	0	0	1	0	0	1	3	1	0
New.CleanUp.ReferenceOTU58988	k__Bacteria; p__Firmicutes; c__Clostridia; o__Clostridiales; f__; g__; s__	0.404762	0.736652	0	0	0	0	1	2	0	1	0	1	1	0
New.CleanUp.ReferenceOTU61309	k__Bacteria; p__Firmicutes; c__Clostridia; o__Clostridiales; f__Clostridiaceae; g__SMB53; s__	0.404762	0.736652	0	2	0	0	0	0	0	4	1	2	1	0
New.CleanUp.ReferenceOTU67567	k__Bacteria; p__Firmicutes; c__Clostridia; o__Clostridiales; f__Ruminococcaceae; g__; s__	0.404762	0.736652	0	3	0	0	0	0	1	2	4	0	1	0
New.CleanUp.ReferenceOTU68338	k__Bacteria; p__Verrucomicrobia; c__Verrucomicrobiae; o__Verrucomicrobiales; f__Verrucomicrobiaceae; g__Akkermansia; s__muciniphila	0.404762	0.736652	1	0	0	0	0	1	0	0	6	1	1	0
New.CleanUp.ReferenceOTU69613	k__Bacteria; p__Firmicutes; c__Clostridia; o__Clostridiales; f__Dehalobacteriaceae; g__Dehalobacterium; s__	0.404762	0.736652	0	1	0	0	0	1	1	3	0	0	1	0
New.CleanUp.ReferenceOTU70378	k__Bacteria; p__Bacteroidetes; c__Bacteroidia; o__Bacteroidales; f__S24-7; g__; s__	0.404762	0.736652	0	3	0	1	1	0	0	0	0	1	0	1
New.CleanUp.ReferenceOTU70581	k__Bacteria; p__Firmicutes; c__Clostridia; o__Clostridiales; f__Ruminococcaceae; g__Oscillospira; s__	0.404762	0.736652	0	0	0	0	1	0	2	1	0	1	1	0
New.CleanUp.ReferenceOTU70941	k__Bacteria; p__Firmicutes; c__Clostridia; o__Clostridiales; f__Ruminococcaceae	0.404762	0.736652	1	0	0	0	0	1	2	0	0	1	1	0
New.CleanUp.ReferenceOTU72529	k__Bacteria; p__Firmicutes; c__Clostridia; o__Clostridiales; f__Lachnospiraceae; g__[Ruminococcus]; s__gnavus	0.404762	0.736652	0	1	0	0	0	0	0	1	1	2	1	0
New.CleanUp.ReferenceOTU75177	k__Bacteria; p__Firmicutes; c__Clostridia; o__Clostridiales; f__Ruminococcaceae; g__Oscillospira; s__	0.404762	0.736652	4	0	1	1	0	0	0	1	0	0	0	1
New.CleanUp.ReferenceOTU75777	k__Bacteria; p__Firmicutes; c__Clostridia; o__Clostridiales; f__Lachnospiraceae; g__; s__	0.404762	0.736652	0	0	0	1	0	1	0	3	0	1	1	0
New.CleanUp.ReferenceOTU75864	k__Bacteria; p__Firmicutes; c__Clostridia; o__Clostridiales; f__Dehalobacteriaceae; g__Dehalobacterium; s__	0.404762	0.736652	1	0	0	0	0	0	1	2	1	0	1	0
New.CleanUp.ReferenceOTU77819	k__Bacteria; p__Verrucomicrobia; c__Verrucomicrobiae; o__Verrucomicrobiales; f__Verrucomicrobiaceae; g__Akkermansia; s__muciniphila	0.404762	0.736652	0	0	2	1	1	1	0	0	0	0	0	1
New.CleanUp.ReferenceOTU79525	k__Bacteria; p__Bacteroidetes; c__Bacteroidia; o__Bacteroidales; f__Porphyromonadaceae; g__Parabacteroides; s__	0.404762	0.736652	0	0	1	0	0	1	0	2	0	1	1	0
New.CleanUp.ReferenceOTU82429	k__Bacteria; p__Firmicutes; c__Clostridia; o__Clostridiales; f__Ruminococcaceae; g__; s__	0.404762	0.736652	1	0	2	0	4	2	0	0	0	0	0	1
New.CleanUp.ReferenceOTU83028	k__Bacteria; p__Bacteroidetes; c__Bacteroidia; o__Bacteroidales; f__S24-7; g__; s__	0.404762	0.736652	1	0	0	1	2	0	1	0	0	0	0	1
New.CleanUp.ReferenceOTU83361	k__Bacteria; p__Bacteroidetes; c__Bacteroidia; o__Bacteroidales; f__S24-7; g__; s__	0.404762	0.736652	0	2	0	1	1	0	0	0	1	0	0	1
New.CleanUp.ReferenceOTU8900	k__Bacteria; p__Firmicutes; c__Clostridia; o__Clostridiales; f__Ruminococcaceae; g__Oscillospira; s__	0.404762	0.736652	0	0	0	1	0	1	0	2	0	1	1	0
New.ReferenceOTU178	k__Bacteria; p__Firmicutes; c__Clostridia; o__Clostridiales; f__; g__; s__	0.404762	0.736652	0	1	0	0	0	0	2	0	1	1	1	0
New.ReferenceOTU193	k__Bacteria; p__Firmicutes; c__Clostridia; o__Clostridiales; f__; g__; s__	0.404762	0.736652	11	48	0	1	0	14	0	0	0	0	0	1
New.CleanUp.ReferenceOTU12183	k__Bacteria; p__Firmicutes; c__Bacilli; o__Lactobacillales; f__Lactobacillaceae; g__Lactobacillus; s__	0.412698	0.736652	1	11	5	4	2	2	3	8	24	11	8	4
New.CleanUp.ReferenceOTU51239	Unassigned	0.412698	0.736652	3	4	5	1	0	1	2	4	0	0	1	3
New.CleanUp.ReferenceOTU9652	k__Bacteria; p__Firmicutes; c__Clostridia; o__Clostridiales; f__Ruminococcaceae; g__Oscillospira; s__	0.412698	0.736652	3	4	1	2	2	7	0	12	10	2	7	2
New.ReferenceOTU244	k__Bacteria; p__Verrucomicrobia; c__Verrucomicrobiae; o__Verrucomicrobiales; f__Verrucomicrobiaceae; g__Akkermansia; s__muciniphila	0.412698	0.736652	35	57	68	44	51	73	47	76	44	57	57	51
135956	k__Bacteria; p__Firmicutes; c__Bacilli; o__Lactobacillales; f__Lactobacillaceae; g__Lactobacillus; s__	0.420635	0.736652	607	1336	2517	1716	1226	765	1680	1338	8585	4585	1680	1336
162005	k__Bacteria; p__Firmicutes; c__Clostridia; o__Clostridiales; f__Ruminococcaceae; g__Oscillospira; s__	0.420635	0.736652	166	619	234	232	380	466	242	277	331	500	331	234
163153	k__Bacteria; p__Firmicutes; c__Clostridia; o__Clostridiales; f__Ruminococcaceae; g__Oscillospira; s__	0.420635	0.736652	0	1	3	3	0	4	0	2	1	4	2	1
170950	k__Bacteria; p__Firmicutes; c__Clostridia; o__Clostridiales; f__Ruminococcaceae; g__Ruminococcus; s__	0.420635	0.736652	63	117	71	136	47	128	106	171	40	154	128	71
261590	k__Bacteria; p__Firmicutes; c__Clostridia; o__Clostridiales; f__Peptostreptococcaceae; g__; s__	0.420635	0.736652	154	820	1054	687	718	959	647	876	747	2005	876	718
265280	k__Bacteria; p__Firmicutes; c__Clostridia; o__Clostridiales; f__Lachnospiraceae; g__; s__	0.420635	0.736652	1041	1348	1186	1776	645	1010	732	962	688	1564	962	1186
New.CleanUp.ReferenceOTU21355	k__Bacteria; p__Firmicutes; c__Clostridia; o__Clostridiales; f__Ruminococcaceae; g__; s__	0.420635	0.736652	1	1	1	0	1	2	0	5	0	5	2	1
New.ReferenceOTU257	k__Bacteria; p__Firmicutes; c__Clostridia; o__Clostridiales; f__; g__; s__	0.420635	0.736652	68	50	24	21	30	145	23	86	22	94	86	30
267717	k__Bacteria; p__Firmicutes; c__Clostridia; o__Clostridiales; f__Lachnospiraceae; g__[Ruminococcus]; s__gnavus	0.428571	0.736652	11	0	4	1	0	6	1	1	1	12	1	1
New.CleanUp.ReferenceOTU13327	k__Bacteria; p__Verrucomicrobia; c__Verrucomicrobiae; o__Verrucomicrobiales; f__Verrucomicrobiaceae; g__Akkermansia; s__muciniphila	0.428571	0.736652	1	4	6	4	11	4	2	2	6	2	2	4
New.CleanUp.ReferenceOTU32160	k__Bacteria; p__Firmicutes; c__Clostridia; o__Clostridiales; f__Ruminococcaceae; g__Oscillospira; s__	0.428571	0.736652	0	2	1	0	1	2	2	0	2	1	2	1
New.CleanUp.ReferenceOTU3932	Unassigned	0.428571	0.736652	2	1	0	2	1	0	2	0	0	1	0	1
New.CleanUp.ReferenceOTU58499	k__Bacteria; p__Firmicutes; c__Clostridia; o__Clostridiales; f__Peptostreptococcaceae; g__; s__	0.436508	0.736652	2	3	1	1	4	3	2	0	1	1	1	2
1135616	k__Bacteria; p__Firmicutes; c__Bacilli; o__Lactobacillales; f__Enterococcaceae; g__Enterococcus; s__	0.444444	0.736652	0	0	2	1	0	0	0	0	0	0	0	0
114462	k__Bacteria; p__Proteobacteria; c__Gammaproteobacteria; o__Enterobacteriales; f__Enterobacteriaceae; g__; s__	0.444444	0.736652	1	0	1	0	0	0	0	0	0	0	0	0
130335	k__Bacteria; p__Firmicutes; c__Clostridia; o__Clostridiales; f__; g__; s__	0.444444	0.736652	0	0	0	0	0	15	0	0	0	24	0	0
152014	k__Bacteria; p__Firmicutes; c__Clostridia; o__Clostridiales; f__; g__; s__	0.444444	0.736652	0	0	3	1	0	0	0	0	0	0	0	0
162991	k__Bacteria; p__Firmicutes; c__Clostridia; o__Clostridiales; f__Ruminococcaceae; g__; s__	0.444444	0.736652	0	0	0	0	0	0	0	3	2	0	0	0
163997	k__Bacteria; p__Firmicutes; c__Clostridia; o__Clostridiales; f__; g__; s__	0.444444	0.736652	0	0	0	12	10	0	0	0	0	0	0	0
164719	k__Bacteria; p__Firmicutes; c__Clostridia; o__Clostridiales; f__Lachnospiraceae; g__[Ruminococcus]; s__gnavus	0.444444	0.736652	0	0	0	0	0	0	0	2	4	0	0	0
173192	k__Bacteria; p__Firmicutes; c__Clostridia; o__Clostridiales; f__Lachnospiraceae; g__[Ruminococcus]; s__gnavus	0.444444	0.736652	0	0	0	0	0	0	0	1	0	1	0	0
174374	k__Bacteria; p__Firmicutes; c__Clostridia; o__Clostridiales; f__; g__; s__	0.444444	0.736652	0	0	0	1	2	0	0	0	0	0	0	0
174417	k__Bacteria; p__Firmicutes; c__Clostridia; o__Clostridiales; f__; g__; s__	0.444444	0.736652	0	0	0	0	0	2	1	0	0	0	0	0
174686	k__Bacteria; p__Firmicutes; c__Clostridia; o__Clostridiales; f__; g__; s__	0.444444	0.736652	0	0	0	0	0	0	0	2	2	0	0	0
175193	k__Bacteria; p__Firmicutes; c__Clostridia; o__Clostridiales; f__; g__; s__	0.444444	0.736652	0	0	0	1	0	2	0	4	0	0	0	0
175227	k__Bacteria; p__Firmicutes; c__Clostridia; o__Clostridiales; f__; g__; s__	0.444444	0.736652	2	2	0	0	0	0	0	0	0	1	0	0
176990	k__Bacteria; p__Firmicutes; c__Clostridia; o__Clostridiales; f__; g__; s__	0.444444	0.736652	0	2	0	0	1	0	0	0	0	0	0	0
177836	k__Bacteria; p__Firmicutes; c__Clostridia; o__Clostridiales; f__Lachnospiraceae; g__Blautia; s__producta	0.444444	0.736652	0	0	1	0	2	0	0	0	0	0	0	0
178061	k__Bacteria; p__Firmicutes; c__Clostridia; o__Clostridiales; f__; g__; s__	0.444444	0.736652	0	1	2	0	0	0	0	0	0	0	0	0
179067	k__Bacteria; p__Firmicutes; c__Clostridia; o__Clostridiales; f__; g__; s__	0.444444	0.736652	0	0	0	2	2	0	0	0	0	0	0	0
181849	k__Bacteria; p__Firmicutes; c__Clostridia; o__Clostridiales; f__Clostridiaceae; g__Clostridium; s__	0.444444	0.736652	0	1	1	0	0	0	0	0	0	0	0	0
182632	k__Bacteria; p__Firmicutes; c__Clostridia; o__Clostridiales; f__Lachnospiraceae; g__; s__	0.444444	0.736652	0	0	0	0	0	0	0	3	0	1	0	0
182723	k__Bacteria; p__Firmicutes; c__Clostridia; o__Clostridiales; f__Lachnospiraceae; g__; s__	0.444444	0.736652	0	0	0	0	0	0	1	0	0	1	0	0
183606	k__Bacteria; p__Firmicutes; c__Clostridia; o__Clostridiales; f__; g__; s__	0.444444	0.736652	0	0	0	0	0	3	1	0	0	0	0	0
183829	k__Bacteria; p__Firmicutes; c__Clostridia; o__Clostridiales; f__Ruminococcaceae; g__; s__	0.444444	0.736652	0	0	0	1	2	0	0	0	0	0	0	0
1838560	k__Bacteria; p__Firmicutes; c__Clostridia; o__Clostridiales; f__Clostridiaceae; g__Clostridium; s__	0.444444	0.736652	1	0	0	0	1	0	0	0	0	0	0	0
1844553	k__Bacteria; p__Firmicutes; c__Clostridia; o__Clostridiales; f__Ruminococcaceae; g__Oscillospira; s__	0.444444	0.736652	0	0	1	0	0	0	38	0	17	0	0	0
185483	k__Bacteria; p__Firmicutes; c__Clostridia; o__Clostridiales; f__; g__; s__	0.444444	0.736652	0	0	0	0	0	0	0	0	1	1	0	0
185552	k__Bacteria; p__Firmicutes; c__Clostridia; o__Clostridiales; f__; g__; s__	0.444444	0.736652	0	0	0	0	0	1	1	0	0	0	0	0
185884	k__Bacteria; p__Firmicutes; c__Clostridia; o__Clostridiales; f__Lachnospiraceae; g__Blautia; s__producta	0.444444	0.736652	1	0	0	0	1	0	0	0	0	0	0	0
186406	k__Bacteria; p__Firmicutes; c__Clostridia; o__Clostridiales; f__Lachnospiraceae; g__[Ruminococcus]; s__gnavus	0.444444	0.736652	0	0	0	0	0	0	1	0	0	1	0	0
1871	k__Bacteria; p__Deferribacteres; c__Deferribacteres; o__Deferribacterales; f__Deferribacteraceae; g__Mucispirillum; s__schaedleri	0.444444	0.736652	6	1	0	0	0	0	0	0	0	0	0	0
188266	k__Bacteria; p__Firmicutes; c__Clostridia; o__Clostridiales; f__Lachnospiraceae; g__; s__	0.444444	0.736652	0	0	0	0	0	0	1	0	0	1	0	0
190490	k__Bacteria; p__Firmicutes; c__Clostridia; o__Clostridiales; f__Ruminococcaceae; g__; s__	0.444444	0.736652	0	0	0	0	0	0	2	0	1	0	0	0
190652	k__Bacteria; p__Firmicutes; c__Clostridia; o__Clostridiales; f__; g__; s__	0.444444	0.736652	0	15	0	114	0	0	0	0	0	0	0	0
192342	k__Bacteria; p__Proteobacteria; c__Gammaproteobacteria; o__Enterobacteriales; f__Enterobacteriaceae; g__; s__	0.444444	0.736652	0	1	0	1	0	0	0	0	0	0	0	0
193064	k__Bacteria; p__Firmicutes; c__Clostridia; o__Clostridiales; f__; g__; s__	0.444444	0.736652	0	1	2	0	0	0	0	0	0	0	0	0
193784	k__Bacteria; p__Firmicutes; c__Clostridia; o__Clostridiales; f__Lachnospiraceae; g__; s__	0.444444	0.736652	0	0	0	0	0	3	0	0	0	1	0	0
194416	k__Bacteria; p__Firmicutes; c__Clostridia; o__Clostridiales; f__Lachnospiraceae; g__Blautia; s__producta	0.444444	0.736652	0	0	0	2	1	0	0	0	0	0	0	0
194504	k__Bacteria; p__Firmicutes; c__Clostridia; o__Clostridiales; f__; g__; s__	0.444444	0.736652	0	0	0	0	0	0	1	0	1	0	0	0
195385	k__Bacteria; p__Firmicutes; c__Clostridia; o__Clostridiales; f__Lachnospiraceae; g__[Ruminococcus]; s__gnavus	0.444444	0.736652	0	2	0	0	1	0	0	0	0	0	0	0
217109	k__Bacteria; p__Firmicutes; c__Clostridia; o__Clostridiales; f__Christensenellaceae; g__; s__	0.444444	0.736652	4	0	0	0	2	0	0	0	0	0	0	0
228043	k__Bacteria; p__Firmicutes; c__Clostridia; o__Clostridiales; f__; g__; s__	0.444444	0.736652	0	1	0	1	0	3	0	2	0	1	1	0
228310	k__Bacteria; p__Tenericutes; c__Mollicutes; o__Anaeroplasmatales; f__Anaeroplasmataceae; g__Anaeroplasma; s__	0.444444	0.736652	0	1	0	0	1	0	0	0	0	0	0	0
231028	k__Bacteria; p__Firmicutes; c__Clostridia; o__Clostridiales; f__Ruminococcaceae; g__Oscillospira; s__	0.444444	0.736652	0	0	0	0	0	0	0	1	1	0	0	0
233191	k__Bacteria; p__Firmicutes; c__Clostridia; o__Clostridiales; f__Ruminococcaceae; g__Oscillospira; s__	0.444444	0.736652	0	1	0	2	0	0	0	0	0	0	0	0
244484	k__Bacteria; p__Firmicutes; c__Clostridia; o__Clostridiales; f__Ruminococcaceae; g__; s__	0.444444	0.736652	1	0	0	0	1	0	0	0	0	0	0	0
254938	k__Bacteria; p__Proteobacteria; c__Betaproteobacteria; o__Burkholderiales; f__Oxalobacteraceae; g__; s__	0.444444	0.736652	0	0	0	1	1	0	0	0	0	0	0	0
258148	k__Bacteria; p__Firmicutes; c__Clostridia; o__Clostridiales; f__Lachnospiraceae; g__; s__	0.444444	0.736652	0	0	1	1	0	0	0	0	0	0	0	0
258368	k__Bacteria; p__Firmicutes; c__Clostridia; o__Clostridiales; f__Lachnospiraceae; g__; s__	0.444444	0.736652	14	0	0	12	0	0	0	0	0	0	0	0
259251	k__Bacteria; p__Firmicutes; c__Clostridia; o__Clostridiales; f__; g__; s__	0.444444	0.736652	0	0	0	0	0	0	0	0	1	1	0	0
260088	k__Bacteria; p__Firmicutes; c__Clostridia; o__Clostridiales; f__Lachnospiraceae; g__[Ruminococcus]; s__gnavus	0.444444	0.736652	0	0	0	0	0	0	0	1	2	0	0	0
261992	k__Bacteria; p__Firmicutes; c__Clostridia; o__Clostridiales; f__; g__; s__	0.444444	0.736652	0	0	1	2	0	0	0	0	0	0	0	0
262634	k__Bacteria; p__Firmicutes; c__Clostridia; o__Clostridiales; f__; g__; s__	0.444444	0.736652	0	0	0	0	0	0	0	1	3	0	0	0
262935	k__Bacteria; p__Firmicutes; c__Clostridia; o__Clostridiales; f__; g__; s__	0.444444	0.736652	0	0	0	0	0	0	0	0	2	1	0	0
264372	k__Bacteria; p__Firmicutes; c__Clostridia; o__Clostridiales; f__; g__; s__	0.444444	0.736652	0	0	0	0	0	3	0	0	0	2	0	0
265011	k__Bacteria; p__Firmicutes; c__Clostridia; o__Clostridiales; f__Lachnospiraceae; g__; s__	0.444444	0.736652	5	13	0	0	0	0	0	0	0	0	0	0
265030	k__Bacteria; p__Firmicutes; c__Clostridia; o__Clostridiales; f__; g__; s__	0.444444	0.736652	0	0	1	1	0	0	0	1	2	2	1	0
265548	k__Bacteria; p__Firmicutes; c__Clostridia; o__Clostridiales; f__; g__; s__	0.444444	0.736652	1	1	0	0	0	0	0	0	0	0	0	0
266052	k__Bacteria; p__Firmicutes; c__Clostridia; o__Clostridiales; f__; g__; s__	0.444444	0.736652	7	20	0	0	0	2	0	0	0	0	0	0
268865	k__Bacteria; p__Firmicutes; c__Clostridia; o__Clostridiales; f__Ruminococcaceae; g__; s__	0.444444	0.736652	0	0	0	0	0	0	0	2	2	0	0	0
268880	k__Bacteria; p__Firmicutes; c__Clostridia; o__Clostridiales; f__Lachnospiraceae; g__; s__	0.444444	0.736652	0	0	0	0	0	0	1	0	0	2	0	0
268978	k__Bacteria; p__Firmicutes; c__Clostridia; o__Clostridiales; f__Lachnospiraceae; g__; s__	0.444444	0.736652	0	4	0	0	1	5	0	0	1	8	1	0
272111	k__Bacteria; p__Firmicutes; c__Clostridia; o__Clostridiales; f__; g__; s__	0.444444	0.736652	0	0	0	0	2	3	0	4	0	0	0	0
274844	k__Bacteria; p__Firmicutes; c__Clostridia; o__Clostridiales; f__; g__; s__	0.444444	0.736652	0	0	0	0	0	1	2	0	0	0	0	0
275180	k__Bacteria; p__Firmicutes; c__Clostridia; o__Clostridiales; f__; g__; s__	0.444444	0.736652	4	0	0	1	0	0	0	0	0	0	0	0
275423	k__Bacteria; p__Firmicutes; c__Clostridia; o__Clostridiales; f__Ruminococcaceae; g__Oscillospira; s__	0.444444	0.736652	0	2	0	1	0	0	0	0	0	0	0	0
275592	k__Bacteria; p__Firmicutes; c__Clostridia; o__Clostridiales; f__Clostridiaceae; g__; s__	0.444444	0.736652	1	1	0	0	0	0	0	0	0	0	0	0
275796	k__Bacteria; p__Firmicutes; c__Clostridia; o__Clostridiales; f__; g__; s__	0.444444	0.736652	0	0	0	0	0	1	0	0	0	3	0	0
275895	k__Bacteria; p__Firmicutes; c__Clostridia; o__Clostridiales; f__; g__; s__	0.444444	0.736652	0	0	0	0	0	0	0	1	1	0	0	0
276522	k__Bacteria; p__Firmicutes; c__Clostridia; o__Clostridiales; f__Ruminococcaceae; g__Oscillospira; s__	0.444444	0.736652	0	2	1	0	0	0	0	0	0	0	0	0
277067	k__Bacteria; p__Firmicutes; c__Clostridia; o__Clostridiales; f__; g__; s__	0.444444	0.736652	0	0	0	0	0	16	0	0	0	5	0	0
277946	k__Bacteria; p__Firmicutes; c__Clostridia; o__Clostridiales; f__; g__; s__	0.444444	0.736652	0	2	0	2	0	0	0	0	0	0	0	0
288109	k__Bacteria; p__Firmicutes; c__Clostridia; o__Clostridiales; f__Dehalobacteriaceae; g__Dehalobacterium; s__	0.444444	0.736652	2	2	2	1	2	2	2	2	0	0	2	2
302641	k__Bacteria; p__Firmicutes; c__Clostridia; o__Clostridiales; f__Ruminococcaceae; g__Oscillospira; s__	0.444444	0.736652	0	0	0	0	0	0	0	0	1	1	0	0
305152	k__Bacteria; p__Firmicutes; c__Clostridia; o__Clostridiales; f__Lachnospiraceae; g__; s__	0.444444	0.736652	0	0	0	0	0	1	0	1	0	0	0	0
310407	k__Bacteria; p__Firmicutes; c__Clostridia; o__Clostridiales; f__; g__; s__	0.444444	0.736652	0	0	0	0	0	78	0	0	0	185	0	0
315496	k__Bacteria; p__Firmicutes; c__Clostridia; o__Clostridiales; f__Lachnospiraceae; g__; s__	0.444444	0.736652	0	0	2	0	0	4	0	0	0	8	0	0
319196	k__Bacteria; p__Firmicutes; c__Clostridia; o__Clostridiales; f__Lachnospiraceae; g__; s__	0.444444	0.736652	0	0	0	0	0	1	0	1	0	0	0	0
320249	k__Bacteria; p__Firmicutes; c__Clostridia; o__Clostridiales; f__Ruminococcaceae; g__Oscillospira; s__	0.444444	0.736652	20	18	12	18	11	20	38	17	19	12	19	18
326569	k__Bacteria; p__Firmicutes; c__Clostridia; o__Clostridiales; f__Clostridiaceae; g__; s__	0.444444	0.736652	0	0	1	0	1	0	0	0	0	0	0	0
327284	k__Bacteria; p__Firmicutes; c__Clostridia; o__Clostridiales; f__; g__; s__	0.444444	0.736652	2	1	0	0	0	0	0	0	0	0	0	0
327596	k__Bacteria; p__Firmicutes; c__Clostridia; o__Clostridiales; f__Lachnospiraceae; g__; s__	0.444444	0.736652	0	0	0	0	0	1	0	0	1	0	0	0
330333	k__Bacteria; p__Firmicutes; c__Clostridia; o__Clostridiales; f__Ruminococcaceae; g__Oscillospira; s__	0.444444	0.736652	0	0	0	0	0	0	1	1	0	0	0	0
330417	k__Bacteria; p__Firmicutes; c__Clostridia; o__Clostridiales; f__; g__; s__	0.444444	0.736652	0	3	0	0	1	0	0	0	0	0	0	0
334915	k__Bacteria; p__Firmicutes; c__Clostridia; o__Clostridiales; f__; g__; s__	0.444444	0.736652	2	5	0	0	0	0	0	0	0	1	0	0
335183	k__Bacteria; p__Firmicutes; c__Clostridia; o__Clostridiales; f__; g__; s__	0.444444	0.736652	0	0	0	0	0	0	1	0	0	1	0	0
337379	k__Bacteria; p__Firmicutes; c__Clostridia; o__Clostridiales; f__Clostridiaceae; g__; s__	0.444444	0.736652	0	0	1	1	0	0	0	0	0	0	0	0
344053	k__Bacteria; p__Proteobacteria; c__Gammaproteobacteria; o__Oceanospirillales; f__Halomonadaceae; g__Halomonas; s__	0.444444	0.736652	0	0	0	0	0	0	1	0	1	0	0	0
344101	k__Bacteria; p__Firmicutes; c__Clostridia; o__Clostridiales; f__Ruminococcaceae; g__; s__	0.444444	0.736652	0	0	0	0	0	0	0	1	1	0	0	0
350698	k__Bacteria; p__Firmicutes; c__Clostridia; o__Clostridiales; f__; g__; s__	0.444444	0.736652	0	0	0	0	0	1	0	0	0	1	0	0
352022	k__Bacteria; p__Firmicutes; c__Clostridia; o__Clostridiales; f__Lachnospiraceae; g__; s__	0.444444	0.736652	1	0	0	2	0	0	0	0	0	0	0	0
356632	k__Bacteria; p__Firmicutes; c__Clostridia; o__Clostridiales; f__Ruminococcaceae; g__Oscillospira; s__	0.444444	0.736652	0	0	0	0	0	0	1	1	0	0	0	0
3919792	k__Bacteria; p__Firmicutes; c__Clostridia; o__Clostridiales; f__; g__; s__	0.444444	0.736652	4	0	0	1	0	0	0	0	0	0	0	0
395040	k__Bacteria; p__Firmicutes; c__Clostridia; o__Clostridiales; f__; g__; s__	0.444444	0.736652	0	0	0	0	0	0	0	1	0	1	0	0
40149	k__Bacteria; p__Firmicutes; c__Clostridia; o__Clostridiales; f__Ruminococcaceae; g__Oscillospira; s__	0.444444	0.736652	0	0	0	0	0	0	0	2	0	1	0	0
403497	k__Bacteria; p__Firmicutes; c__Clostridia; o__Clostridiales; f__Lachnospiraceae; g__; s__	0.444444	0.736652	1	1	0	0	0	0	0	0	0	0	0	0
407963	k__Bacteria; p__Firmicutes; c__Clostridia; o__Clostridiales; f__Ruminococcaceae; g__Oscillospira; s__	0.444444	0.736652	0	0	0	0	0	0	2	1	0	0	0	0
422283	k__Bacteria; p__Firmicutes; c__Clostridia; o__Clostridiales; f__Ruminococcaceae; g__Oscillospira; s__	0.444444	0.736652	0	0	0	0	0	1	0	0	0	1	0	0
4308591	k__Bacteria; p__Bacteroidetes; c__Bacteroidia; o__Bacteroidales; f__Porphyromonadaceae; g__Parabacteroides; s__	0.444444	0.736652	0	1	0	0	1	2	2	1	0	0	1	0
434339	k__Bacteria; p__Firmicutes; c__Clostridia; o__Clostridiales; f__; g__; s__	0.444444	0.736652	0	0	0	0	0	1	0	1	0	0	0	0
4381092	k__Bacteria; p__Firmicutes; c__Clostridia; o__Clostridiales; f__Clostridiaceae; g__; s__	0.444444	0.736652	0	0	1	0	1	0	0	0	0	0	0	0
4396656	k__Bacteria; p__Firmicutes; c__Clostridia; o__Clostridiales; f__Clostridiaceae; g__; s__	0.444444	0.736652	1	0	1	0	0	0	0	0	0	0	0	0
4403349	k__Bacteria; p__Firmicutes; c__Clostridia; o__Clostridiales; f__Ruminococcaceae; g__Oscillospira; s__	0.444444	0.736652	0	0	0	0	0	0	0	1	1	0	0	0
4463108	k__Bacteria; p__Firmicutes; c__Bacilli; o__Lactobacillales; f__Lactobacillaceae; g__Lactobacillus; s__ruminis	0.444444	0.736652	0	1	6	0	2	0	1	0	1	0	0	1
4472091	k__Bacteria; p__Firmicutes; c__Clostridia; o__Clostridiales; f__Ruminococcaceae; g__Ruminococcus; s__	0.444444	0.736652	0	0	0	0	0	1	0	1	0	0	0	0
509709	k__Bacteria; p__Firmicutes; c__Clostridia; o__Clostridiales; f__Lachnospiraceae; g__; s__	0.444444	0.736652	0	1	0	1	0	0	0	0	0	0	0	0
616688	k__Bacteria; p__Firmicutes; c__Clostridia; o__Clostridiales; f__Clostridiaceae; g__; s__	0.444444	0.736652	0	1	2	0	0	0	0	0	0	0	0	0
665703	k__Bacteria; p__Firmicutes; c__Clostridia; o__Clostridiales; f__; g__; s__	0.444444	0.736652	63	0	0	0	3	0	0	0	1	0	0	0
718358	k__Bacteria; p__Firmicutes; c__Clostridia; o__Clostridiales; f__Ruminococcaceae; g__; s__	0.444444	0.736652	0	0	0	8	11	0	0	0	0	0	0	0
732128	k__Bacteria; p__Firmicutes; c__Clostridia; o__Clostridiales; f__; g__; s__	0.444444	0.736652	23	0	0	0	9	0	0	0	0	0	0	0
782953	k__Bacteria; p__Proteobacteria; c__Gammaproteobacteria; o__Enterobacteriales; f__Enterobacteriaceae; g__; s__	0.444444	0.736652	0	0	1	1	0	0	2	0	1	3	1	0
786449	k__Bacteria; p__Firmicutes; c__Clostridia; o__Clostridiales; f__Lachnospiraceae; g__; s__	0.444444	0.736652	0	0	0	0	0	0	2	0	1	0	0	0
832848	k__Bacteria; p__Firmicutes; c__Clostridia; o__Clostridiales; f__; g__; s__	0.444444	0.736652	0	0	7	0	42	0	0	0	0	0	0	0
843459	k__Bacteria; p__Firmicutes; c__Clostridia; o__Clostridiales; f__Clostridiaceae; g__; s__	0.444444	0.736652	0	0	1	1	0	0	0	0	0	0	0	0
New.CleanUp.ReferenceOTU10113	k__Bacteria; p__Firmicutes; c__Clostridia; o__Clostridiales; f__; g__; s__	0.444444	0.736652	0	0	0	0	0	0	0	1	0	1	0	0
New.CleanUp.ReferenceOTU10180	k__Bacteria; p__Bacteroidetes; c__Bacteroidia; o__Bacteroidales; f__Porphyromonadaceae; g__Parabacteroides; s__	0.444444	0.736652	0	0	0	0	0	0	1	0	1	0	0	0
New.CleanUp.ReferenceOTU10205	k__Bacteria; p__Firmicutes; c__Clostridia; o__Clostridiales; f__Lachnospiraceae; g__; s__	0.444444	0.736652	0	0	0	0	0	0	0	1	0	1	0	0
New.CleanUp.ReferenceOTU10416	k__Bacteria; p__Firmicutes; c__Clostridia; o__Clostridiales; f__; g__; s__	0.444444	0.736652	0	0	0	0	0	0	0	1	0	1	0	0
New.CleanUp.ReferenceOTU105	k__Bacteria; p__Bacteroidetes; c__Bacteroidia; o__Bacteroidales; f__Porphyromonadaceae; g__Parabacteroides; s__	0.444444	0.736652	0	0	0	0	0	1	0	1	0	0	0	0
New.CleanUp.ReferenceOTU10539	k__Bacteria; p__Bacteroidetes; c__Bacteroidia; o__Bacteroidales; f__Porphyromonadaceae; g__Parabacteroides; s__	0.444444	0.736652	0	0	0	0	0	0	0	1	0	1	0	0
New.CleanUp.ReferenceOTU10607	k__Bacteria; p__Firmicutes; c__Clostridia; o__Clostridiales; f__Lachnospiraceae; g__; s__	0.444444	0.736652	0	0	0	0	0	0	0	1	1	0	0	0
New.CleanUp.ReferenceOTU10628	k__Bacteria; p__Verrucomicrobia; c__Verrucomicrobiae; o__Verrucomicrobiales; f__Verrucomicrobiaceae; g__Akkermansia; s__muciniphila	0.444444	0.736652	0	0	1	1	0	0	0	0	0	0	0	0
New.CleanUp.ReferenceOTU10723	k__Bacteria; p__Firmicutes; c__Clostridia; o__Clostridiales; f__; g__; s__	0.444444	0.736652	1	4	3	0	0	0	0	0	2	1	0	1
New.CleanUp.ReferenceOTU10794	k__Bacteria; p__Bacteroidetes; c__Bacteroidia; o__Bacteroidales; f__Porphyromonadaceae; g__Parabacteroides; s__	0.444444	0.736652	0	0	0	0	0	1	0	0	0	2	0	0
New.CleanUp.ReferenceOTU10878	k__Bacteria; p__Firmicutes; c__Clostridia; o__Clostridiales; f__; g__; s__	0.444444	0.736652	0	0	0	0	0	1	0	0	0	1	0	0
New.CleanUp.ReferenceOTU10929	k__Bacteria; p__Verrucomicrobia; c__Verrucomicrobiae; o__Verrucomicrobiales; f__Verrucomicrobiaceae; g__Akkermansia; s__muciniphila	0.444444	0.736652	0	0	0	0	0	0	0	0	1	1	0	0
New.CleanUp.ReferenceOTU10937	k__Bacteria; p__Firmicutes; c__Clostridia; o__Clostridiales; f__; g__; s__	0.444444	0.736652	0	0	2	1	0	0	0	0	0	0	0	0
New.CleanUp.ReferenceOTU11119	k__Bacteria; p__Bacteroidetes; c__Bacteroidia; o__Bacteroidales; f__S24-7; g__; s__	0.444444	0.736652	0	0	0	2	2	0	0	0	0	0	0	0
New.CleanUp.ReferenceOTU11170	k__Bacteria; p__Firmicutes; c__Clostridia; o__Clostridiales; f__; g__; s__	0.444444	0.736652	0	2	0	1	0	0	0	0	0	0	0	0
New.CleanUp.ReferenceOTU11234	k__Bacteria; p__Bacteroidetes; c__Bacteroidia; o__Bacteroidales; f__Porphyromonadaceae; g__Parabacteroides; s__	0.444444	0.736652	1	0	1	0	0	0	0	0	0	0	0	0
New.CleanUp.ReferenceOTU11261	k__Bacteria; p__Actinobacteria; c__Coriobacteriia; o__Coriobacteriales; f__Coriobacteriaceae; g__Adlercreutzia; s__	0.444444	0.736652	0	0	1	3	3	0	1	0	1	0	0	1
New.CleanUp.ReferenceOTU11266	k__Bacteria; p__Firmicutes; c__Clostridia; o__Clostridiales; f__; g__; s__	0.444444	0.736652	0	0	0	0	0	0	0	1	0	1	0	0
New.CleanUp.ReferenceOTU11319	k__Bacteria; p__Firmicutes; c__Clostridia; o__Clostridiales; f__; g__; s__	0.444444	0.736652	0	0	1	1	0	0	0	0	0	0	0	0
New.CleanUp.ReferenceOTU11383	k__Bacteria; p__Firmicutes; c__Clostridia; o__Clostridiales; f__Peptostreptococcaceae; g__; s__	0.444444	0.736652	0	0	0	0	0	1	1	0	0	0	0	0
New.CleanUp.ReferenceOTU11588	k__Bacteria; p__Firmicutes; c__Clostridia; o__Clostridiales; f__Ruminococcaceae; g__; s__	0.444444	0.736652	0	0	0	0	0	3	0	1	0	0	0	0
New.CleanUp.ReferenceOTU11612	k__Bacteria; p__Bacteroidetes; c__Bacteroidia; o__Bacteroidales; f__Porphyromonadaceae; g__Parabacteroides; s__	0.444444	0.736652	1	0	1	0	0	0	0	0	0	0	0	0
New.CleanUp.ReferenceOTU11618	k__Bacteria; p__Firmicutes; c__Bacilli; o__Lactobacillales; f__Lactobacillaceae; g__Lactobacillus; s__	0.444444	0.736652	0	0	0	0	0	0	0	1	0	4	0	0
New.CleanUp.ReferenceOTU11646	k__Bacteria; p__Firmicutes; c__Clostridia; o__Clostridiales; f__; g__; s__	0.444444	0.736652	6	0	0	1	0	0	0	0	0	0	0	0
New.CleanUp.ReferenceOTU11670	k__Bacteria; p__Firmicutes; c__Clostridia; o__Clostridiales; f__Lachnospiraceae	0.444444	0.736652	0	0	1	0	1	0	0	0	0	0	0	0
New.CleanUp.ReferenceOTU11718	k__Bacteria; p__Firmicutes; c__Clostridia; o__Clostridiales; f__; g__; s__	0.444444	0.736652	0	0	0	0	0	2	0	2	0	0	0	0
New.CleanUp.ReferenceOTU11847	k__Bacteria; p__Bacteroidetes; c__Bacteroidia; o__Bacteroidales; f__Porphyromonadaceae; g__Parabacteroides; s__	0.444444	0.736652	0	0	0	0	0	1	0	0	0	1	0	0
New.CleanUp.ReferenceOTU11856	Unassigned	0.444444	0.736652	3	0	1	0	0	0	0	0	0	0	0	0
New.CleanUp.ReferenceOTU11886	k__Bacteria; p__Firmicutes; c__Clostridia; o__Clostridiales; f__Ruminococcaceae; g__Ruminococcus; s__	0.444444	0.736652	1	0	0	0	0	0	2	2	0	0	0	0
New.CleanUp.ReferenceOTU11965	k__Bacteria; p__Verrucomicrobia; c__Verrucomicrobiae; o__Verrucomicrobiales; f__Verrucomicrobiaceae; g__Akkermansia; s__muciniphila	0.444444	0.736652	0	0	0	0	0	0	0	0	1	1	0	0
New.CleanUp.ReferenceOTU12000	k__Bacteria; p__Firmicutes; c__Clostridia; o__Clostridiales; f__; g__; s__	0.444444	0.736652	1	0	2	0	0	0	0	0	0	0	0	0
New.CleanUp.ReferenceOTU12114	k__Bacteria; p__Bacteroidetes; c__Bacteroidia; o__Bacteroidales; f__S24-7; g__; s__	0.444444	0.736652	0	1	0	1	0	0	0	0	0	0	0	0
New.CleanUp.ReferenceOTU12168	k__Bacteria; p__Firmicutes; c__Clostridia; o__Clostridiales; f__Dehalobacteriaceae; g__Dehalobacterium; s__	0.444444	0.736652	0	0	0	0	0	0	0	0	1	1	0	0
New.CleanUp.ReferenceOTU12182	k__Bacteria; p__Bacteroidetes; c__Bacteroidia; o__Bacteroidales; f__Porphyromonadaceae; g__Parabacteroides; s__	0.444444	0.736652	0	0	0	0	0	0	1	1	0	0	0	0
New.CleanUp.ReferenceOTU1226	k__Bacteria; p__Firmicutes; c__Clostridia; o__Clostridiales; f__Ruminococcaceae; g__Oscillospira; s__	0.444444	0.736652	0	0	0	0	0	0	0	5	2	0	0	0
New.CleanUp.ReferenceOTU12330	k__Bacteria; p__Firmicutes; c__Clostridia; o__Clostridiales; f__; g__; s__	0.444444	0.736652	1	0	1	0	0	0	0	0	0	0	0	0
New.CleanUp.ReferenceOTU12361	k__Bacteria; p__Verrucomicrobia; c__Verrucomicrobiae; o__Verrucomicrobiales; f__Verrucomicrobiaceae; g__Akkermansia; s__muciniphila	0.444444	0.736652	0	1	0	0	1	0	0	0	0	0	0	0
New.CleanUp.ReferenceOTU12511	k__Bacteria; p__Firmicutes; c__Clostridia; o__Clostridiales; f__; g__; s__	0.444444	0.736652	0	0	0	0	0	1	1	0	0	0	0	0
New.CleanUp.ReferenceOTU12530	k__Bacteria; p__Firmicutes; c__Clostridia; o__Clostridiales; f__Lachnospiraceae; g__[Ruminococcus]; s__gnavus	0.444444	0.736652	0	0	0	0	0	1	0	0	0	1	0	0
New.CleanUp.ReferenceOTU12541	k__Bacteria; p__Firmicutes; c__Clostridia; o__Clostridiales; f__Lachnospiraceae; g__[Ruminococcus]; s__gnavus	0.444444	0.736652	0	0	1	1	0	0	0	0	0	0	0	0
New.CleanUp.ReferenceOTU12711	k__Bacteria; p__Firmicutes; c__Clostridia; o__Clostridiales; f__Ruminococcaceae; g__Oscillospira; s__	0.444444	0.736652	0	0	0	0	0	0	0	1	0	1	0	0
New.CleanUp.ReferenceOTU1278	k__Bacteria; p__Firmicutes; c__Clostridia; o__Clostridiales; f__Clostridiaceae; g__; s__	0.444444	0.736652	0	1	1	0	0	0	0	0	0	0	0	0
New.CleanUp.ReferenceOTU12879	k__Bacteria; p__Firmicutes; c__Clostridia; o__Clostridiales; f__Ruminococcaceae; g__; s__	0.444444	0.736652	1	0	2	0	0	0	0	0	0	0	0	0
New.CleanUp.ReferenceOTU1292	k__Bacteria; p__Firmicutes; c__Clostridia; o__Clostridiales; f__Lachnospiraceae; g__; s__	0.444444	0.736652	0	1	0	0	0	2	3	0	0	0	0	0
New.CleanUp.ReferenceOTU12990	k__Bacteria; p__Firmicutes; c__Clostridia; o__Clostridiales; f__Ruminococcaceae; g__Oscillospira; s__	0.444444	0.736652	0	0	0	0	0	0	0	0	1	1	0	0
New.CleanUp.ReferenceOTU12996	k__Bacteria; p__Firmicutes; c__Clostridia; o__Clostridiales	0.444444	0.736652	0	3	0	1	0	0	0	0	0	0	0	0
New.CleanUp.ReferenceOTU13015	k__Bacteria; p__Bacteroidetes; c__Bacteroidia; o__Bacteroidales; f__S24-7; g__; s__	0.444444	0.736652	0	0	0	0	0	1	0	0	0	1	0	0
New.CleanUp.ReferenceOTU13169	k__Bacteria; p__Bacteroidetes; c__Bacteroidia; o__Bacteroidales; f__Porphyromonadaceae; g__Parabacteroides; s__	0.444444	0.736652	0	0	0	0	0	1	0	0	0	1	0	0
New.CleanUp.ReferenceOTU13193	k__Bacteria; p__Firmicutes; c__Clostridia; o__Clostridiales; f__; g__; s__	0.444444	0.736652	0	0	1	2	0	0	0	0	0	0	0	0
New.CleanUp.ReferenceOTU1327	k__Bacteria; p__Firmicutes; c__Clostridia; o__Clostridiales; f__Ruminococcaceae; g__Oscillospira; s__	0.444444	0.736652	0	0	0	0	0	0	0	0	1	1	0	0
New.CleanUp.ReferenceOTU133	k__Bacteria; p__Firmicutes; c__Clostridia; o__Clostridiales; f__; g__; s__	0.444444	0.736652	2	0	1	0	0	0	0	0	0	0	0	0
New.CleanUp.ReferenceOTU13355	Unassigned	0.444444	0.736652	0	0	2	0	1	0	0	0	0	0	0	0
New.CleanUp.ReferenceOTU13360	k__Bacteria; p__Bacteroidetes; c__Bacteroidia; o__Bacteroidales; f__Porphyromonadaceae; g__Parabacteroides; s__	0.444444	0.736652	0	0	0	0	0	1	0	1	0	0	0	0
New.CleanUp.ReferenceOTU13420	k__Bacteria; p__Bacteroidetes; c__Bacteroidia; o__Bacteroidales; f__Porphyromonadaceae; g__Parabacteroides; s__	0.444444	0.736652	1	0	1	0	0	0	0	0	0	0	0	0
New.CleanUp.ReferenceOTU13582	k__Bacteria; p__Firmicutes; c__Clostridia; o__Clostridiales; f__; g__; s__	0.444444	0.736652	0	0	0	0	0	0	1	0	0	1	0	0
New.CleanUp.ReferenceOTU13769	k__Bacteria; p__Firmicutes; c__Clostridia; o__Clostridiales; f__; g__; s__	0.444444	0.736652	0	0	0	0	0	0	0	1	0	1	0	0
New.CleanUp.ReferenceOTU13787	Unassigned	0.444444	0.736652	0	1	1	0	0	0	0	0	0	0	0	0
New.CleanUp.ReferenceOTU13868	k__Bacteria; p__Firmicutes; c__Clostridia; o__Clostridiales; f__Ruminococcaceae; g__; s__	0.444444	0.736652	0	0	0	0	0	1	0	0	0	1	0	0
New.CleanUp.ReferenceOTU13906	k__Bacteria; p__Bacteroidetes; c__Bacteroidia; o__Bacteroidales; f__Porphyromonadaceae; g__Parabacteroides; s__	0.444444	0.736652	1	0	0	0	1	0	0	0	0	0	0	0
New.CleanUp.ReferenceOTU13935	k__Bacteria; p__Firmicutes; c__Clostridia; o__Clostridiales; f__; g__; s__	0.444444	0.736652	0	0	0	0	0	1	0	0	0	1	0	0
New.CleanUp.ReferenceOTU13966	k__Bacteria; p__Bacteroidetes; c__Bacteroidia; o__Bacteroidales; f__S24-7; g__; s__	0.444444	0.736652	3	2	3	0	4	1	3	3	1	0	1	3
New.CleanUp.ReferenceOTU14578	k__Bacteria; p__Bacteroidetes; c__Bacteroidia; o__Bacteroidales; f__Porphyromonadaceae; g__Parabacteroides; s__	0.444444	0.736652	1	0	0	0	1	0	0	0	0	0	0	0
New.CleanUp.ReferenceOTU14690	k__Bacteria; p__Firmicutes; c__Bacilli; o__Lactobacillales; f__Lactobacillaceae; g__Lactobacillus; s__	0.444444	0.736652	0	0	1	1	0	0	0	0	0	0	0	0
New.CleanUp.ReferenceOTU14766	k__Bacteria; p__Firmicutes; c__Clostridia; o__Clostridiales; f__; g__; s__	0.444444	0.736652	0	0	3	0	1	0	0	0	0	0	0	0
New.CleanUp.ReferenceOTU14811	k__Bacteria; p__Firmicutes; c__Clostridia; o__Clostridiales; f__Ruminococcaceae; g__Oscillospira; s__	0.444444	0.736652	0	0	0	0	0	0	1	1	0	0	0	0
New.CleanUp.ReferenceOTU14923	k__Bacteria; p__Firmicutes; c__Clostridia; o__Clostridiales; f__; g__; s__	0.444444	0.736652	0	0	0	0	0	0	0	7	1	0	0	0
New.CleanUp.ReferenceOTU15021	k__Bacteria; p__Firmicutes; c__Clostridia; o__Clostridiales; f__; g__; s__	0.444444	0.736652	0	0	0	0	0	2	0	0	0	2	0	0
New.CleanUp.ReferenceOTU15131	k__Bacteria; p__Firmicutes; c__Clostridia; o__Clostridiales; f__Lachnospiraceae; g__; s__	0.444444	0.736652	0	0	0	0	0	0	0	2	0	2	0	0
New.CleanUp.ReferenceOTU15186	k__Bacteria; p__Firmicutes; c__Clostridia; o__Clostridiales; f__; g__; s__	0.444444	0.736652	0	1	1	0	0	0	0	0	0	0	0	0
New.CleanUp.ReferenceOTU15272	k__Bacteria; p__Firmicutes; c__Clostridia; o__Clostridiales; f__; g__; s__	0.444444	0.736652	0	0	0	0	0	1	0	1	0	0	0	0
New.CleanUp.ReferenceOTU15335	k__Bacteria; p__Firmicutes; c__Clostridia; o__Clostridiales; f__Ruminococcaceae; g__; s__	0.444444	0.736652	0	0	0	0	0	1	0	1	0	0	0	0
New.CleanUp.ReferenceOTU15357	k__Bacteria; p__Firmicutes; c__Clostridia; o__Clostridiales; f__Ruminococcaceae; g__; s__	0.444444	0.736652	1	0	0	0	1	0	0	0	0	0	0	0
New.CleanUp.ReferenceOTU15372	k__Bacteria; p__Verrucomicrobia; c__Verrucomicrobiae; o__Verrucomicrobiales; f__Verrucomicrobiaceae; g__Akkermansia; s__muciniphila	0.444444	0.736652	1	0	0	0	1	0	0	0	0	0	0	0
New.CleanUp.ReferenceOTU15375	k__Bacteria; p__Firmicutes; c__Clostridia; o__Clostridiales; f__Ruminococcaceae	0.444444	0.736652	0	1	0	1	0	0	0	0	0	0	0	0
New.CleanUp.ReferenceOTU15415	k__Bacteria; p__Bacteroidetes; c__Bacteroidia; o__Bacteroidales; f__Porphyromonadaceae; g__Parabacteroides; s__	0.444444	0.736652	0	0	1	0	1	0	0	0	0	0	0	0
New.CleanUp.ReferenceOTU15536	k__Bacteria; p__Firmicutes; c__Clostridia; o__Clostridiales; f__[Mogibacteriaceae]; g__; s__	0.444444	0.736652	1	1	0	0	0	0	0	0	0	0	0	0
New.CleanUp.ReferenceOTU15650	k__Bacteria; p__Firmicutes; c__Clostridia; o__Clostridiales; f__; g__; s__	0.444444	0.736652	0	0	0	0	0	0	2	0	0	1	0	0
New.CleanUp.ReferenceOTU1578	k__Bacteria; p__Firmicutes; c__Clostridia; o__Clostridiales; f__Lachnospiraceae; g__Coprococcus; s__	0.444444	0.736652	0	1	0	1	0	0	0	0	0	0	0	0
New.CleanUp.ReferenceOTU15829	k__Bacteria; p__Firmicutes; c__Clostridia; o__Clostridiales; f__; g__; s__	0.444444	0.736652	0	0	0	0	0	2	0	0	2	0	0	0
New.CleanUp.ReferenceOTU15921	k__Bacteria; p__Firmicutes; c__Clostridia; o__Clostridiales; f__Ruminococcaceae; g__; s__	0.444444	0.736652	0	0	0	0	0	1	0	0	2	0	0	0
New.CleanUp.ReferenceOTU16029	k__Bacteria; p__Firmicutes; c__Clostridia; o__Clostridiales; f__; g__; s__	0.444444	0.736652	1	0	0	0	0	3	0	7	0	0	0	0
New.CleanUp.ReferenceOTU16045	k__Bacteria; p__Firmicutes; c__Clostridia; o__Clostridiales; f__Lachnospiraceae; g__; s__	0.444444	0.736652	1	1	0	0	0	0	0	0	0	0	0	0
New.CleanUp.ReferenceOTU16046	k__Bacteria; p__Firmicutes; c__Clostridia; o__Clostridiales; f__Lachnospiraceae; g__; s__	0.444444	0.736652	0	0	1	1	0	0	0	0	0	0	0	0
New.CleanUp.ReferenceOTU16134	k__Bacteria; p__Firmicutes; c__Clostridia; o__Clostridiales	0.444444	0.736652	0	0	0	0	0	1	0	1	0	0	0	0
New.CleanUp.ReferenceOTU16243	k__Bacteria; p__Bacteroidetes; c__Bacteroidia; o__Bacteroidales; f__S24-7; g__; s__	0.444444	0.736652	0	0	1	0	1	0	0	0	0	0	0	0
New.CleanUp.ReferenceOTU16267	k__Bacteria; p__Bacteroidetes; c__Bacteroidia; o__Bacteroidales; f__Porphyromonadaceae; g__Parabacteroides; s__	0.444444	0.736652	1	1	0	0	0	0	0	0	0	0	0	0
New.CleanUp.ReferenceOTU1628	k__Bacteria; p__Bacteroidetes; c__Bacteroidia; o__Bacteroidales; f__S24-7; g__; s__	0.444444	0.736652	0	1	0	0	1	0	0	0	0	0	0	0
New.CleanUp.ReferenceOTU1629	k__Bacteria; p__Firmicutes; c__Clostridia; o__Clostridiales; f__; g__; s__	0.444444	0.736652	0	6	0	1	0	0	0	0	0	0	0	0
New.CleanUp.ReferenceOTU1645	k__Bacteria; p__Firmicutes; c__Clostridia; o__Clostridiales; f__; g__; s__	0.444444	0.736652	0	0	0	0	0	0	1	1	0	0	0	0
New.CleanUp.ReferenceOTU16519	k__Bacteria; p__Firmicutes; c__Clostridia; o__Clostridiales; f__; g__; s__	0.444444	0.736652	0	0	0	0	0	1	0	1	0	0	0	0
New.CleanUp.ReferenceOTU16533	Unassigned	0.444444	0.736652	0	0	1	0	1	2	0	0	1	3	1	0
New.CleanUp.ReferenceOTU16538	k__Bacteria; p__Firmicutes; c__Clostridia; o__Clostridiales; f__; g__; s__	0.444444	0.736652	0	1	0	1	0	0	0	0	0	0	0	0
New.CleanUp.ReferenceOTU16606	Unassigned	0.444444	0.736652	0	0	0	0	0	2	0	0	0	2	0	0
New.CleanUp.ReferenceOTU16654	k__Bacteria; p__Firmicutes; c__Clostridia; o__Clostridiales; f__Ruminococcaceae; g__Ruminococcus; s__	0.444444	0.736652	0	2	1	0	0	0	0	0	0	0	0	0
New.CleanUp.ReferenceOTU16683	Unassigned	0.444444	0.736652	0	0	0	0	0	1	0	0	1	0	0	0
New.CleanUp.ReferenceOTU16691	k__Bacteria; p__Firmicutes; c__Clostridia; o__Clostridiales; f__Ruminococcaceae; g__; s__	0.444444	0.736652	0	0	0	0	0	0	0	3	1	0	0	0
New.CleanUp.ReferenceOTU16944	k__Bacteria; p__Firmicutes; c__Clostridia; o__Clostridiales; f__Lachnospiraceae; g__; s__	0.444444	0.736652	0	0	0	0	0	0	0	1	0	2	0	0
New.CleanUp.ReferenceOTU16975	k__Bacteria; p__Firmicutes; c__Clostridia; o__Clostridiales; f__; g__; s__	0.444444	0.736652	0	0	1	0	1	0	0	0	0	0	0	0
New.CleanUp.ReferenceOTU1710	k__Bacteria; p__Firmicutes; c__Clostridia; o__Clostridiales; f__; g__; s__	0.444444	0.736652	1	0	2	0	0	0	0	0	0	0	0	0
New.CleanUp.ReferenceOTU17101	k__Bacteria; p__Firmicutes; c__Clostridia; o__Clostridiales; f__; g__; s__	0.444444	0.736652	0	1	0	1	0	0	0	0	0	0	0	0
New.CleanUp.ReferenceOTU17107	k__Bacteria; p__Firmicutes; c__Clostridia; o__Clostridiales; f__Ruminococcaceae; g__Oscillospira; s__	0.444444	0.736652	0	0	0	0	0	1	0	3	0	0	0	0
New.CleanUp.ReferenceOTU17210	k__Bacteria; p__Firmicutes; c__Clostridia; o__Clostridiales; f__Lachnospiraceae; g__Coprococcus; s__	0.444444	0.736652	0	1	1	0	0	0	0	0	0	0	0	0
New.CleanUp.ReferenceOTU17239	k__Bacteria; p__Bacteroidetes; c__Bacteroidia; o__Bacteroidales; f__Porphyromonadaceae; g__Parabacteroides; s__	0.444444	0.736652	0	0	0	0	0	1	0	0	1	0	0	0
New.CleanUp.ReferenceOTU17428	k__Bacteria; p__Firmicutes; c__Bacilli; o__Turicibacterales; f__Turicibacteraceae; g__Turicibacter; s__	0.444444	0.736652	0	0	3	0	1	0	0	0	0	0	0	0
New.CleanUp.ReferenceOTU17557	k__Bacteria; p__Bacteroidetes; c__Bacteroidia; o__Bacteroidales; f__Porphyromonadaceae; g__Parabacteroides; s__	0.444444	0.736652	0	0	0	0	0	1	0	0	0	1	0	0
New.CleanUp.ReferenceOTU17627	k__Bacteria; p__Bacteroidetes; c__Bacteroidia; o__Bacteroidales; f__Porphyromonadaceae; g__Parabacteroides; s__	0.444444	0.736652	0	0	0	1	1	0	0	0	0	0	0	0
New.CleanUp.ReferenceOTU17636	k__Bacteria; p__Firmicutes; c__Clostridia; o__Clostridiales; f__Lachnospiraceae; g__[Ruminococcus]; s__gnavus	0.444444	0.736652	0	0	0	0	0	1	0	0	0	1	0	0
New.CleanUp.ReferenceOTU17646	k__Bacteria; p__Firmicutes; c__Clostridia; o__Clostridiales; f__Ruminococcaceae; g__Oscillospira; s__	0.444444	0.736652	0	0	0	0	0	0	0	1	0	1	0	0
New.CleanUp.ReferenceOTU17733	k__Bacteria; p__Firmicutes; c__Clostridia; o__Clostridiales; f__Ruminococcaceae; g__; s__	0.444444	0.736652	0	0	1	1	0	0	0	0	0	0	0	0
New.CleanUp.ReferenceOTU17993	k__Bacteria; p__Bacteroidetes; c__Bacteroidia; o__Bacteroidales; f__Porphyromonadaceae; g__Parabacteroides; s__	0.444444	0.736652	0	0	0	0	0	1	0	0	0	1	0	0
New.CleanUp.ReferenceOTU18135	k__Bacteria; p__Firmicutes; c__Clostridia; o__Clostridiales; f__Dehalobacteriaceae; g__Dehalobacterium; s__	0.444444	0.736652	0	0	0	0	0	1	0	1	0	0	0	0
New.CleanUp.ReferenceOTU1824	k__Bacteria; p__Firmicutes; c__Clostridia; o__Clostridiales; f__Ruminococcaceae; g__Oscillospira; s__	0.444444	0.736652	0	0	0	0	0	0	1	1	0	0	0	0
New.CleanUp.ReferenceOTU18280	k__Bacteria; p__Firmicutes; c__Clostridia; o__Clostridiales	0.444444	0.736652	0	1	0	1	0	0	0	0	0	0	0	0
New.CleanUp.ReferenceOTU18316	k__Bacteria; p__Firmicutes; c__Clostridia; o__Clostridiales; f__Lachnospiraceae; g__; s__	0.444444	0.736652	0	1	1	0	0	0	0	0	0	0	0	0
New.CleanUp.ReferenceOTU18327	k__Bacteria; p__Firmicutes; c__Clostridia; o__Clostridiales; f__; g__; s__	0.444444	0.736652	0	0	1	0	0	0	0	0	2	2	0	0
New.CleanUp.ReferenceOTU18412	k__Bacteria; p__Firmicutes; c__Clostridia; o__Clostridiales; f__Ruminococcaceae; g__Oscillospira; s__	0.444444	0.736652	0	0	0	0	0	1	0	1	0	0	0	0
New.CleanUp.ReferenceOTU18520	k__Bacteria; p__Firmicutes; c__Clostridia; o__Clostridiales; f__; g__; s__	0.444444	0.736652	0	0	0	0	0	0	1	0	1	0	0	0
New.CleanUp.ReferenceOTU18528	k__Bacteria; p__Firmicutes; c__Clostridia; o__Clostridiales; f__; g__; s__	0.444444	0.736652	0	3	2	0	0	0	0	0	0	0	0	0
New.CleanUp.ReferenceOTU18572	k__Bacteria; p__Firmicutes; c__Clostridia; o__Clostridiales; f__; g__; s__	0.444444	0.736652	0	1	0	2	0	0	0	0	0	0	0	0
New.CleanUp.ReferenceOTU18616	k__Bacteria; p__Firmicutes; c__Clostridia; o__Clostridiales; f__[Mogibacteriaceae]; g__; s__	0.444444	0.736652	0	1	0	0	1	0	0	0	0	0	0	0
New.CleanUp.ReferenceOTU18683	k__Bacteria; p__Firmicutes; c__Clostridia; o__Clostridiales; f__Ruminococcaceae; g__Oscillospira; s__	0.444444	0.736652	0	0	0	0	0	0	0	0	1	1	0	0
New.CleanUp.ReferenceOTU18825	k__Bacteria; p__Firmicutes; c__Clostridia; o__Clostridiales; f__; g__; s__	0.444444	0.736652	0	0	0	0	0	0	0	1	0	2	0	0
New.CleanUp.ReferenceOTU18827	k__Bacteria; p__Firmicutes; c__Clostridia; o__Clostridiales; f__Lachnospiraceae; g__; s__	0.444444	0.736652	0	0	0	0	0	1	0	0	0	1	0	0
New.CleanUp.ReferenceOTU18828	k__Bacteria; p__Bacteroidetes; c__Bacteroidia; o__Bacteroidales; f__S24-7; g__; s__	0.444444	0.736652	1	0	1	0	0	0	0	0	0	0	0	0
New.CleanUp.ReferenceOTU18958	k__Bacteria; p__Firmicutes; c__Clostridia; o__Clostridiales; f__Clostridiaceae; g__; s__	0.444444	0.736652	0	1	1	0	0	0	0	0	0	0	0	0
New.CleanUp.ReferenceOTU18962	k__Bacteria; p__Firmicutes; c__Clostridia; o__Clostridiales; f__Ruminococcaceae; g__Oscillospira; s__	0.444444	0.736652	0	0	0	0	0	1	0	1	0	0	0	0
New.CleanUp.ReferenceOTU18973	k__Bacteria; p__Firmicutes; c__Bacilli; o__Lactobacillales; f__Lactobacillaceae; g__Lactobacillus; s__	0.444444	0.736652	0	0	0	0	0	0	1	0	1	0	0	0
New.CleanUp.ReferenceOTU18993	k__Bacteria; p__Firmicutes; c__Clostridia; o__Clostridiales; f__Lachnospiraceae; g__; s__	0.444444	0.736652	0	0	0	0	0	0	0	1	0	1	0	0
New.CleanUp.ReferenceOTU19061	k__Bacteria; p__Firmicutes; c__Clostridia; o__Clostridiales; f__Ruminococcaceae; g__; s__	0.444444	0.736652	0	0	0	0	0	1	0	1	0	0	0	0
New.CleanUp.ReferenceOTU19157	k__Bacteria; p__Firmicutes; c__Clostridia; o__Clostridiales; f__[Mogibacteriaceae]; g__; s__	0.444444	0.736652	1	0	0	3	0	0	0	0	0	0	0	0
New.CleanUp.ReferenceOTU19159	k__Bacteria; p__Firmicutes; c__Clostridia; o__Clostridiales; f__; g__; s__	0.444444	0.736652	1	0	0	1	0	0	0	0	0	0	0	0
New.CleanUp.ReferenceOTU1923	k__Bacteria; p__Firmicutes; c__Clostridia; o__Clostridiales; f__Ruminococcaceae; g__; s__	0.444444	0.736652	0	0	0	0	0	0	0	3	1	0	0	0
New.CleanUp.ReferenceOTU19400	k__Bacteria; p__Firmicutes; c__Clostridia; o__Clostridiales; f__Lachnospiraceae; g__; s__	0.444444	0.736652	0	0	0	0	0	1	0	3	0	0	0	0
New.CleanUp.ReferenceOTU19474	k__Bacteria; p__Firmicutes; c__Clostridia; o__Clostridiales; f__; g__; s__	0.444444	0.736652	0	0	0	0	0	0	0	1	1	0	0	0
New.CleanUp.ReferenceOTU19519	k__Bacteria; p__Firmicutes; c__Clostridia; o__Clostridiales; f__; g__; s__	0.444444	0.736652	0	0	0	0	0	0	0	2	1	0	0	0
New.CleanUp.ReferenceOTU19531	k__Bacteria; p__Bacteroidetes; c__Bacteroidia; o__Bacteroidales; f__S24-7; g__; s__	0.444444	0.736652	0	0	1	0	1	0	0	0	0	0	0	0
New.CleanUp.ReferenceOTU19570	k__Bacteria; p__Firmicutes; c__Clostridia; o__Clostridiales; f__; g__; s__	0.444444	0.736652	1	1	0	0	0	0	0	0	0	0	0	0
New.CleanUp.ReferenceOTU19581	k__Bacteria; p__Firmicutes; c__Clostridia; o__Clostridiales; f__; g__; s__	0.444444	0.736652	0	0	0	0	0	0	1	1	0	0	0	0
New.CleanUp.ReferenceOTU19582	k__Bacteria; p__Firmicutes; c__Clostridia; o__Clostridiales; f__Ruminococcaceae; g__Oscillospira; s__	0.444444	0.736652	0	0	0	0	0	0	2	2	0	0	0	0
New.CleanUp.ReferenceOTU19607	k__Bacteria; p__Firmicutes; c__Clostridia; o__Clostridiales; f__Ruminococcaceae; g__Oscillospira; s__	0.444444	0.736652	0	0	0	0	0	0	0	2	0	2	0	0
New.CleanUp.ReferenceOTU19638	Unassigned	0.444444	0.736652	0	0	1	3	0	0	0	0	0	0	0	0
New.CleanUp.ReferenceOTU19672	k__Bacteria; p__Firmicutes; c__Clostridia; o__Clostridiales; f__Lachnospiraceae; g__Coprococcus; s__	0.444444	0.736652	0	0	0	0	0	1	0	0	1	0	0	0
New.CleanUp.ReferenceOTU19708	k__Bacteria; p__Firmicutes; c__Clostridia; o__Clostridiales; f__; g__; s__	0.444444	0.736652	1	0	1	0	0	0	0	0	0	0	0	0
New.CleanUp.ReferenceOTU19820	k__Bacteria; p__Bacteroidetes; c__Bacteroidia; o__Bacteroidales; f__Porphyromonadaceae; g__Parabacteroides; s__	0.444444	0.736652	0	1	0	1	0	0	0	0	0	0	0	0
New.CleanUp.ReferenceOTU19842	k__Bacteria; p__Bacteroidetes; c__Bacteroidia; o__Bacteroidales; f__Porphyromonadaceae; g__Parabacteroides; s__	0.444444	0.736652	0	0	0	0	0	0	0	0	1	1	0	0
New.CleanUp.ReferenceOTU19967	k__Bacteria; p__Bacteroidetes; c__Bacteroidia; o__Bacteroidales; f__Porphyromonadaceae; g__Parabacteroides; s__	0.444444	0.736652	0	0	1	1	0	0	0	0	0	0	0	0
New.CleanUp.ReferenceOTU20018	k__Bacteria; p__Firmicutes; c__Clostridia; o__Clostridiales; f__Ruminococcaceae; g__; s__	0.444444	0.736652	0	0	2	1	0	0	0	0	0	0	0	0
New.CleanUp.ReferenceOTU20102	k__Bacteria; p__Firmicutes; c__Clostridia; o__Clostridiales; f__; g__; s__	0.444444	0.736652	0	0	0	0	0	2	0	0	0	1	0	0
New.CleanUp.ReferenceOTU20201	k__Bacteria; p__Bacteroidetes; c__Bacteroidia; o__Bacteroidales; f__Porphyromonadaceae; g__Parabacteroides; s__	0.444444	0.736652	0	0	0	0	0	0	0	0	3	1	0	0
New.CleanUp.ReferenceOTU20284	k__Bacteria; p__Firmicutes; c__Clostridia; o__Clostridiales; f__; g__; s__	0.444444	0.736652	0	0	0	0	0	1	0	0	0	1	0	0
New.CleanUp.ReferenceOTU20333	k__Bacteria; p__Firmicutes; c__Clostridia; o__Clostridiales; f__Dehalobacteriaceae; g__Dehalobacterium; s__	0.444444	0.736652	0	0	0	0	0	1	0	1	0	0	0	0
New.CleanUp.ReferenceOTU20358	k__Bacteria; p__Bacteroidetes; c__Bacteroidia; o__Bacteroidales; f__Porphyromonadaceae; g__Parabacteroides; s__	0.444444	0.736652	0	1	0	1	0	0	0	0	0	0	0	0
New.CleanUp.ReferenceOTU20690	Unassigned	0.444444	0.736652	0	0	0	0	0	2	1	0	0	0	0	0
New.CleanUp.ReferenceOTU21058	k__Bacteria; p__Verrucomicrobia; c__Verrucomicrobiae; o__Verrucomicrobiales; f__Verrucomicrobiaceae; g__Akkermansia; s__muciniphila	0.444444	0.736652	0	0	0	1	1	0	0	0	0	0	0	0
New.CleanUp.ReferenceOTU21177	k__Bacteria; p__Firmicutes; c__Clostridia; o__Clostridiales; f__; g__; s__	0.444444	0.736652	0	3	0	0	1	0	0	0	0	0	0	0
New.CleanUp.ReferenceOTU21312	k__Bacteria; p__Firmicutes; c__Clostridia; o__Clostridiales; f__; g__; s__	0.444444	0.736652	1	0	2	0	0	0	0	0	0	0	0	0
New.CleanUp.ReferenceOTU21412	k__Bacteria; p__Bacteroidetes; c__Bacteroidia; o__Bacteroidales; f__Porphyromonadaceae; g__Parabacteroides; s__	0.444444	0.736652	1	1	0	0	0	0	0	0	0	0	0	0
New.CleanUp.ReferenceOTU21421	k__Bacteria; p__Firmicutes; c__Clostridia; o__Clostridiales; f__; g__; s__	0.444444	0.736652	2	2	0	0	0	0	0	0	0	0	0	0
New.CleanUp.ReferenceOTU21425	k__Bacteria; p__Firmicutes; c__Clostridia; o__Clostridiales; f__; g__; s__	0.444444	0.736652	0	1	1	0	0	0	0	0	0	0	0	0
New.CleanUp.ReferenceOTU21482	k__Bacteria; p__Firmicutes; c__Clostridia; o__Clostridiales; f__Lachnospiraceae; g__; s__	0.444444	0.736652	0	0	0	0	0	0	0	1	0	1	0	0
New.CleanUp.ReferenceOTU21615	Unassigned	0.444444	0.736652	0	1	0	1	0	0	0	0	0	0	0	0
New.CleanUp.ReferenceOTU21773	Unassigned	0.444444	0.736652	0	3	2	0	0	0	0	0	0	0	0	0
New.CleanUp.ReferenceOTU21801	k__Bacteria; p__Firmicutes; c__Clostridia; o__Clostridiales; f__Ruminococcaceae; g__Oscillospira; s__	0.444444	0.736652	0	0	0	0	0	3	0	1	0	0	0	0
New.CleanUp.ReferenceOTU21841	k__Bacteria; p__Verrucomicrobia; c__Verrucomicrobiae; o__Verrucomicrobiales; f__Verrucomicrobiaceae; g__Akkermansia; s__muciniphila	0.444444	0.736652	0	0	1	0	1	0	0	0	0	0	0	0
New.CleanUp.ReferenceOTU21887	k__Bacteria; p__Firmicutes; c__Clostridia; o__Clostridiales; f__Ruminococcaceae; g__Oscillospira; s__	0.444444	0.736652	1	0	1	0	0	0	0	0	0	0	0	0
New.CleanUp.ReferenceOTU21975	k__Bacteria; p__Firmicutes; c__Clostridia; o__Clostridiales; f__Ruminococcaceae; g__Oscillospira; s__	0.444444	0.736652	0	0	0	0	0	0	1	0	1	0	0	0
New.CleanUp.ReferenceOTU21991	k__Bacteria; p__Firmicutes; c__Clostridia; o__Clostridiales; f__Clostridiaceae; g__; s__	0.444444	0.736652	0	0	1	0	2	0	0	0	0	0	0	0
New.CleanUp.ReferenceOTU22112	k__Bacteria; p__Firmicutes; c__Clostridia; o__Clostridiales; f__Ruminococcaceae; g__Oscillospira; s__	0.444444	0.736652	0	1	0	1	0	3	0	1	2	0	1	0
New.CleanUp.ReferenceOTU22133	k__Bacteria; p__Firmicutes; c__Clostridia; o__Clostridiales; f__Ruminococcaceae; g__; s__	0.444444	0.736652	0	0	0	0	0	0	1	0	1	0	0	0
New.CleanUp.ReferenceOTU22134	k__Bacteria; p__Firmicutes; c__Clostridia; o__Clostridiales; f__; g__; s__	0.444444	0.736652	0	0	0	0	0	2	0	0	0	1	0	0
New.CleanUp.ReferenceOTU22183	k__Bacteria; p__Firmicutes; c__Clostridia; o__Clostridiales; f__Lachnospiraceae; g__[Ruminococcus]; s__gnavus	0.444444	0.736652	0	0	0	0	0	1	0	0	1	0	0	0
New.CleanUp.ReferenceOTU22216	k__Bacteria; p__Firmicutes; c__Clostridia; o__Clostridiales; f__Ruminococcaceae; g__; s__	0.444444	0.736652	0	0	0	0	0	1	0	0	0	1	0	0
New.CleanUp.ReferenceOTU22464	k__Bacteria; p__Firmicutes; c__Clostridia; o__Clostridiales; f__Lachnospiraceae	0.444444	0.736652	3	0	0	1	0	0	0	0	0	0	0	0
New.CleanUp.ReferenceOTU2253	k__Bacteria; p__Firmicutes; c__Clostridia; o__Clostridiales; f__Clostridiaceae; g__; s__	0.444444	0.736652	0	2	0	1	0	0	0	0	0	0	0	0
New.CleanUp.ReferenceOTU22624	k__Bacteria; p__Firmicutes; c__Clostridia; o__Clostridiales; f__Ruminococcaceae; g__Ruminococcus; s__	0.444444	0.736652	2	1	0	0	0	0	0	0	0	0	0	0
New.CleanUp.ReferenceOTU2272	k__Bacteria; p__Bacteroidetes; c__Bacteroidia; o__Bacteroidales; f__S24-7; g__; s__	0.444444	0.736652	2	0	0	1	0	0	0	0	0	0	0	0
New.CleanUp.ReferenceOTU22819	k__Bacteria; p__Bacteroidetes; c__Bacteroidia; o__Bacteroidales; f__Porphyromonadaceae; g__Parabacteroides; s__	0.444444	0.736652	0	1	1	0	0	0	0	0	0	0	0	0
New.CleanUp.ReferenceOTU22896	k__Bacteria; p__Bacteroidetes; c__Bacteroidia; o__Bacteroidales; f__Porphyromonadaceae; g__Parabacteroides; s__	0.444444	0.736652	0	0	0	0	0	0	0	1	0	1	0	0
New.CleanUp.ReferenceOTU22906	k__Bacteria; p__Firmicutes; c__Clostridia; o__Clostridiales; f__; g__; s__	0.444444	0.736652	0	0	0	0	0	1	0	1	0	0	0	0
New.CleanUp.ReferenceOTU22936	k__Bacteria; p__Verrucomicrobia; c__Verrucomicrobiae; o__Verrucomicrobiales; f__Verrucomicrobiaceae; g__Akkermansia; s__muciniphila	0.444444	0.736652	0	0	1	0	1	0	0	0	0	0	0	0
New.CleanUp.ReferenceOTU22972	k__Bacteria; p__Firmicutes; c__Clostridia; o__Clostridiales; f__; g__; s__	0.444444	0.736652	0	1	1	0	0	1	2	5	0	0	1	0
New.CleanUp.ReferenceOTU23130	k__Bacteria; p__Firmicutes; c__Clostridia; o__Clostridiales; f__Ruminococcaceae	0.444444	0.736652	1	1	0	0	0	0	0	0	0	0	0	0
New.CleanUp.ReferenceOTU23221	k__Bacteria; p__Firmicutes; c__Clostridia; o__Clostridiales; f__; g__; s__	0.444444	0.736652	0	0	0	0	0	0	0	1	1	0	0	0
New.CleanUp.ReferenceOTU23245	k__Bacteria; p__Firmicutes; c__Clostridia; o__Clostridiales; f__Ruminococcaceae; g__Oscillospira; s__	0.444444	0.736652	0	0	0	0	0	0	0	1	0	1	0	0
New.CleanUp.ReferenceOTU23341	k__Bacteria; p__Firmicutes; c__Clostridia; o__Clostridiales; f__; g__; s__	0.444444	0.736652	0	0	0	0	0	0	0	1	1	0	0	0
New.CleanUp.ReferenceOTU23391	k__Bacteria; p__Firmicutes; c__Clostridia; o__Clostridiales; f__; g__; s__	0.444444	0.736652	6	0	0	0	1	0	0	0	0	0	0	0
New.CleanUp.ReferenceOTU23526	Unassigned	0.444444	0.736652	2	0	1	0	0	0	0	0	0	0	0	0
New.CleanUp.ReferenceOTU23539	k__Bacteria; p__Firmicutes; c__Clostridia; o__Clostridiales; f__Lachnospiraceae; g__; s__	0.444444	0.736652	0	0	0	0	0	0	0	2	1	0	0	0
New.CleanUp.ReferenceOTU23592	k__Bacteria; p__Firmicutes; c__Clostridia; o__Clostridiales; f__; g__; s__	0.444444	0.736652	0	1	0	1	0	0	0	0	0	0	0	0
New.CleanUp.ReferenceOTU23687	k__Bacteria; p__Firmicutes; c__Clostridia; o__Clostridiales; f__Ruminococcaceae; g__Oscillospira; s__	0.444444	0.736652	0	0	0	0	0	1	0	1	0	0	0	0
New.CleanUp.ReferenceOTU23691	k__Bacteria; p__Bacteroidetes; c__Bacteroidia; o__Bacteroidales; f__Porphyromonadaceae; g__Parabacteroides; s__	0.444444	0.736652	0	0	0	0	0	0	0	0	1	1	0	0
New.CleanUp.ReferenceOTU23749	k__Bacteria; p__Firmicutes; c__Clostridia; o__Clostridiales; f__Dehalobacteriaceae; g__Dehalobacterium; s__	0.444444	0.736652	0	0	0	0	0	0	0	1	0	1	0	0
New.CleanUp.ReferenceOTU23776	k__Bacteria; p__Firmicutes; c__Clostridia; o__Clostridiales; f__Ruminococcaceae; g__Oscillospira; s__	0.444444	0.736652	0	0	0	0	0	0	0	2	0	1	0	0
New.CleanUp.ReferenceOTU23861	k__Bacteria; p__Verrucomicrobia; c__Verrucomicrobiae; o__Verrucomicrobiales; f__Verrucomicrobiaceae; g__Akkermansia; s__muciniphila	0.444444	0.736652	0	1	0	4	3	0	2	0	0	1	0	1
New.CleanUp.ReferenceOTU23947	k__Bacteria; p__Firmicutes; c__Clostridia; o__Clostridiales; f__Lachnospiraceae; g__; s__	0.444444	0.736652	0	0	0	0	0	1	1	0	0	0	0	0
New.CleanUp.ReferenceOTU23993	Unassigned	0.444444	0.736652	4	1	0	0	0	0	0	0	0	0	0	0
New.CleanUp.ReferenceOTU24060	k__Bacteria; p__Verrucomicrobia; c__Verrucomicrobiae; o__Verrucomicrobiales; f__Verrucomicrobiaceae; g__Akkermansia; s__muciniphila	0.444444	0.736652	0	0	0	0	0	0	1	1	0	0	0	0
New.CleanUp.ReferenceOTU24070	k__Bacteria; p__Firmicutes; c__Clostridia; o__Clostridiales; f__; g__; s__	0.444444	0.736652	0	0	0	0	0	0	0	1	1	0	0	0
New.CleanUp.ReferenceOTU2415	k__Bacteria; p__Deferribacteres; c__Deferribacteres; o__Deferribacterales; f__Deferribacteraceae; g__Mucispirillum; s__schaedleri	0.444444	0.736652	11	0	0	0	1	0	0	0	0	0	0	0
New.CleanUp.ReferenceOTU24156	k__Bacteria; p__Firmicutes; c__Clostridia; o__Clostridiales; f__; g__; s__	0.444444	0.736652	2	0	0	1	0	9	0	1	0	3	1	0
New.CleanUp.ReferenceOTU24384	k__Bacteria; p__Firmicutes; c__Clostridia; o__Clostridiales; f__Lachnospiraceae; g__; s__	0.444444	0.736652	0	0	0	0	0	0	0	1	0	1	0	0
New.CleanUp.ReferenceOTU24407	k__Bacteria; p__Firmicutes; c__Clostridia; o__Clostridiales; f__; g__; s__	0.444444	0.736652	1	1	0	0	0	0	0	0	0	0	0	0
New.CleanUp.ReferenceOTU24595	k__Bacteria; p__Bacteroidetes; c__Bacteroidia; o__Bacteroidales; f__Porphyromonadaceae; g__Parabacteroides; s__	0.444444	0.736652	0	0	0	0	0	0	0	1	1	0	0	0
New.CleanUp.ReferenceOTU24639	k__Bacteria; p__Firmicutes; c__Clostridia; o__Clostridiales; f__; g__; s__	0.444444	0.736652	1	0	0	2	0	0	0	0	0	0	0	0
New.CleanUp.ReferenceOTU24674	k__Bacteria; p__Verrucomicrobia; c__Verrucomicrobiae; o__Verrucomicrobiales; f__Verrucomicrobiaceae; g__Akkermansia; s__muciniphila	0.444444	0.736652	2	0	2	0	0	0	0	0	0	0	0	0
New.CleanUp.ReferenceOTU24842	k__Bacteria; p__Bacteroidetes; c__Bacteroidia; o__Bacteroidales; f__S24-7; g__; s__	0.444444	0.736652	0	2	0	0	1	0	0	0	0	0	0	0
New.CleanUp.ReferenceOTU24924	k__Bacteria; p__Firmicutes; c__Clostridia; o__Clostridiales; f__Ruminococcaceae; g__Ruminococcus; s__	0.444444	0.736652	0	1	0	0	2	0	0	0	0	0	0	0
New.CleanUp.ReferenceOTU24997	k__Bacteria; p__Firmicutes; c__Clostridia; o__Clostridiales; f__Lachnospiraceae; g__; s__	0.444444	0.736652	0	1	1	0	0	0	0	0	0	0	0	0
New.CleanUp.ReferenceOTU25096	k__Bacteria; p__Firmicutes; c__Clostridia; o__Clostridiales; f__Ruminococcaceae; g__Ruminococcus; s__	0.444444	0.736652	1	0	1	0	0	0	0	0	0	0	0	0
New.CleanUp.ReferenceOTU25160	k__Bacteria; p__Firmicutes; c__Clostridia; o__Clostridiales; f__; g__; s__	0.444444	0.736652	0	0	0	0	0	0	1	1	0	0	0	0
New.CleanUp.ReferenceOTU25171	k__Bacteria; p__Firmicutes; c__Clostridia; o__Clostridiales; f__Ruminococcaceae; g__Oscillospira; s__	0.444444	0.736652	0	0	0	0	0	0	1	0	0	1	0	0
New.CleanUp.ReferenceOTU25205	k__Bacteria; p__Firmicutes; c__Clostridia; o__Clostridiales; f__; g__; s__	0.444444	0.736652	1	0	0	0	0	2	0	0	0	3	0	0
New.CleanUp.ReferenceOTU25242	k__Bacteria; p__Firmicutes; c__Clostridia; o__Clostridiales; f__; g__; s__	0.444444	0.736652	0	1	7	0	0	0	0	0	0	0	0	0
New.CleanUp.ReferenceOTU25338	k__Bacteria; p__Bacteroidetes; c__Bacteroidia; o__Bacteroidales; f__Porphyromonadaceae; g__Parabacteroides; s__	0.444444	0.736652	0	0	0	1	1	0	0	0	0	0	0	0
New.CleanUp.ReferenceOTU25526	k__Bacteria; p__Firmicutes; c__Clostridia; o__Clostridiales; f__; g__; s__	0.444444	0.736652	0	0	0	0	0	1	0	0	2	0	0	0
New.CleanUp.ReferenceOTU25577	k__Bacteria; p__Firmicutes; c__Clostridia; o__Clostridiales; f__Ruminococcaceae	0.444444	0.736652	0	0	0	0	0	0	0	1	0	1	0	0
New.CleanUp.ReferenceOTU25606	k__Bacteria; p__Bacteroidetes; c__Bacteroidia; o__Bacteroidales; f__Porphyromonadaceae; g__Parabacteroides; s__	0.444444	0.736652	0	0	0	0	0	0	1	0	0	1	0	0
New.CleanUp.ReferenceOTU25753	Unassigned	0.444444	0.736652	2	0	1	0	0	0	0	0	0	0	0	0
New.CleanUp.ReferenceOTU2579	k__Bacteria; p__Firmicutes; c__Clostridia; o__Clostridiales; f__; g__; s__	0.444444	0.736652	0	0	0	0	0	0	0	0	1	1	0	0
New.CleanUp.ReferenceOTU25949	k__Bacteria; p__Verrucomicrobia; c__Verrucomicrobiae; o__Verrucomicrobiales; f__Verrucomicrobiaceae; g__Akkermansia; s__muciniphila	0.444444	0.736652	1	0	4	0	0	0	0	0	0	0	0	0
New.CleanUp.ReferenceOTU2597	k__Bacteria; p__Bacteroidetes; c__Bacteroidia; o__Bacteroidales; f__Porphyromonadaceae; g__Parabacteroides; s__	0.444444	0.736652	0	0	0	0	0	0	0	1	0	1	0	0
New.CleanUp.ReferenceOTU25970	k__Bacteria; p__Firmicutes; c__Clostridia; o__Clostridiales; f__Lachnospiraceae; g__; s__	0.444444	0.736652	0	0	0	0	0	0	0	2	0	1	0	0
New.CleanUp.ReferenceOTU26055	Unassigned	0.444444	0.736652	0	0	0	0	0	1	0	1	0	0	0	0
New.CleanUp.ReferenceOTU26078	k__Bacteria; p__Firmicutes; c__Clostridia; o__Clostridiales; f__Ruminococcaceae; g__Oscillospira; s__	0.444444	0.736652	0	0	0	0	0	0	1	0	1	0	0	0
New.CleanUp.ReferenceOTU26255	k__Bacteria; p__Bacteroidetes; c__Bacteroidia; o__Bacteroidales; f__Porphyromonadaceae; g__Parabacteroides; s__	0.444444	0.736652	0	0	1	1	0	0	0	0	0	0	0	0
New.CleanUp.ReferenceOTU26290	k__Bacteria; p__Bacteroidetes; c__Bacteroidia; o__Bacteroidales; f__S24-7; g__; s__	0.444444	0.736652	1	0	0	0	1	0	0	0	0	0	0	0
New.CleanUp.ReferenceOTU26343	k__Bacteria; p__Bacteroidetes; c__Bacteroidia; o__Bacteroidales; f__Porphyromonadaceae; g__Parabacteroides; s__	0.444444	0.736652	1	0	1	0	0	0	0	0	0	0	0	0
New.CleanUp.ReferenceOTU26390	k__Bacteria; p__Bacteroidetes; c__Bacteroidia; o__Bacteroidales; f__Porphyromonadaceae; g__Parabacteroides; s__	0.444444	0.736652	0	0	0	0	0	0	0	1	1	0	0	0
New.CleanUp.ReferenceOTU26428	k__Bacteria; p__Firmicutes; c__Clostridia; o__Clostridiales; f__Lachnospiraceae; g__; s__	0.444444	0.736652	0	0	1	2	0	0	0	0	0	0	0	0
New.CleanUp.ReferenceOTU26468	k__Bacteria; p__Firmicutes; c__Clostridia; o__Clostridiales; f__Ruminococcaceae; g__Oscillospira; s__	0.444444	0.736652	0	0	0	0	0	0	0	1	0	1	0	0
New.CleanUp.ReferenceOTU26479	k__Bacteria; p__Firmicutes; c__Clostridia; o__Clostridiales; f__; g__; s__	0.444444	0.736652	0	0	0	0	0	1	0	0	0	1	0	0
New.CleanUp.ReferenceOTU26487	k__Bacteria; p__Firmicutes; c__Clostridia; o__Clostridiales; f__Clostridiaceae; g__; s__	0.444444	0.736652	0	0	2	0	1	0	0	0	0	0	0	0
New.CleanUp.ReferenceOTU26505	k__Bacteria; p__Bacteroidetes; c__Bacteroidia; o__Bacteroidales; f__Porphyromonadaceae; g__Parabacteroides; s__	0.444444	0.736652	1	1	0	0	0	0	0	0	0	0	0	0
New.CleanUp.ReferenceOTU26711	k__Bacteria; p__Firmicutes; c__Clostridia; o__Clostridiales; f__; g__; s__	0.444444	0.736652	0	0	0	0	0	2	2	0	0	0	0	0
New.CleanUp.ReferenceOTU26764	k__Bacteria; p__Firmicutes; c__Clostridia; o__Clostridiales; f__; g__; s__	0.444444	0.736652	0	1	6	0	0	0	0	0	0	0	0	0
New.CleanUp.ReferenceOTU26897	k__Bacteria; p__Actinobacteria; c__Coriobacteriia; o__Coriobacteriales; f__Coriobacteriaceae; g__Adlercreutzia; s__	0.444444	0.736652	0	0	1	0	2	0	0	0	0	0	0	0
New.CleanUp.ReferenceOTU27098	k__Bacteria; p__Bacteroidetes; c__Bacteroidia; o__Bacteroidales; f__Porphyromonadaceae; g__Parabacteroides; s__	0.444444	0.736652	1	0	1	0	0	0	0	0	0	0	0	0
New.CleanUp.ReferenceOTU27122	k__Bacteria; p__Firmicutes; c__Clostridia; o__Clostridiales; f__Ruminococcaceae; g__; s__	0.444444	0.736652	0	0	1	1	0	0	0	0	0	0	0	0
New.CleanUp.ReferenceOTU27168	k__Bacteria; p__Firmicutes; c__Clostridia; o__Clostridiales; f__; g__; s__	0.444444	0.736652	0	0	0	0	0	1	0	0	0	2	0	0
New.CleanUp.ReferenceOTU27252	k__Bacteria; p__Firmicutes; c__Clostridia; o__Clostridiales; f__Clostridiaceae; g__; s__	0.444444	0.736652	0	1	1	0	0	0	0	0	0	0	0	0
New.CleanUp.ReferenceOTU27322	k__Bacteria; p__Bacteroidetes; c__Bacteroidia; o__Bacteroidales; f__Porphyromonadaceae; g__Parabacteroides; s__	0.444444	0.736652	0	0	1	1	0	0	0	0	0	0	0	0
New.CleanUp.ReferenceOTU27380	k__Bacteria; p__Firmicutes; c__Clostridia; o__Clostridiales; f__Ruminococcaceae; g__; s__	0.444444	0.736652	0	0	0	0	0	0	0	1	0	1	0	0
New.CleanUp.ReferenceOTU27510	k__Bacteria; p__Bacteroidetes; c__Bacteroidia; o__Bacteroidales; f__S24-7; g__; s__	0.444444	0.736652	0	0	0	0	0	1	0	0	0	1	0	0
New.CleanUp.ReferenceOTU27545	k__Bacteria; p__Firmicutes; c__Clostridia; o__Clostridiales; f__[Mogibacteriaceae]; g__; s__	0.444444	0.736652	1	0	0	0	1	0	0	0	0	0	0	0
New.CleanUp.ReferenceOTU27589	k__Bacteria; p__Firmicutes; c__Clostridia; o__Clostridiales; f__Lachnospiraceae; g__Blautia; s__	0.444444	0.736652	1	1	0	0	0	0	0	0	0	0	0	0
New.CleanUp.ReferenceOTU27653	k__Bacteria; p__Firmicutes; c__Clostridia; o__Clostridiales; f__; g__; s__	0.444444	0.736652	0	0	0	0	0	0	0	1	0	1	0	0
New.CleanUp.ReferenceOTU27701	k__Bacteria; p__Firmicutes; c__Clostridia; o__Clostridiales; f__; g__; s__	0.444444	0.736652	0	2	1	0	0	0	0	0	0	0	0	0
New.CleanUp.ReferenceOTU27704	k__Bacteria; p__Firmicutes; c__Bacilli; o__Lactobacillales; f__Lactobacillaceae; g__Lactobacillus; s__	0.444444	0.736652	1	1	0	0	0	0	0	0	0	0	0	0
New.CleanUp.ReferenceOTU27750	k__Bacteria; p__Firmicutes; c__Clostridia; o__Clostridiales; f__Ruminococcaceae; g__Ruminococcus; s__	0.444444	0.736652	0	2	0	0	3	0	0	0	0	0	0	0
New.CleanUp.ReferenceOTU28155	k__Bacteria; p__Firmicutes; c__Clostridia; o__Clostridiales; f__; g__; s__	0.444444	0.736652	1	2	0	0	0	0	0	0	0	0	0	0
New.CleanUp.ReferenceOTU28254	k__Bacteria; p__Bacteroidetes; c__Bacteroidia; o__Bacteroidales; f__Porphyromonadaceae; g__Parabacteroides; s__	0.444444	0.736652	0	0	0	0	0	0	1	1	0	0	0	0
New.CleanUp.ReferenceOTU28323	k__Bacteria; p__Bacteroidetes; c__Bacteroidia; o__Bacteroidales; f__S24-7; g__; s__	0.444444	0.736652	2	0	0	0	1	0	0	0	0	0	0	0
New.CleanUp.ReferenceOTU28579	k__Bacteria; p__Firmicutes; c__Clostridia; o__Clostridiales; f__Ruminococcaceae; g__Oscillospira; s__	0.444444	0.736652	0	0	0	0	0	0	0	0	1	1	0	0
New.CleanUp.ReferenceOTU28581	k__Bacteria; p__Bacteroidetes; c__Bacteroidia; o__Bacteroidales; f__Porphyromonadaceae; g__Parabacteroides; s__	0.444444	0.736652	0	0	1	1	0	0	0	0	0	0	0	0
New.CleanUp.ReferenceOTU28618	k__Bacteria; p__Firmicutes; c__Clostridia; o__Clostridiales; f__; g__; s__	0.444444	0.736652	4	0	5	0	0	0	0	0	0	0	0	0
New.CleanUp.ReferenceOTU2872	k__Bacteria; p__Verrucomicrobia; c__Verrucomicrobiae; o__Verrucomicrobiales; f__Verrucomicrobiaceae; g__Akkermansia; s__muciniphila	0.444444	0.736652	0	1	1	0	0	0	0	0	0	0	0	0
New.CleanUp.ReferenceOTU28816	k__Bacteria; p__Firmicutes; c__Clostridia; o__Clostridiales; f__; g__; s__	0.444444	0.736652	0	1	0	1	0	0	0	0	0	0	0	0
New.CleanUp.ReferenceOTU28906	k__Bacteria; p__Firmicutes; c__Clostridia; o__Clostridiales; f__; g__; s__	0.444444	0.736652	0	0	0	0	0	0	0	1	0	1	0	0
New.CleanUp.ReferenceOTU28940	k__Bacteria; p__Firmicutes; c__Clostridia; o__Clostridiales; f__Lachnospiraceae; g__; s__	0.444444	0.736652	1	0	0	0	2	0	0	0	0	0	0	0
New.CleanUp.ReferenceOTU2899	k__Bacteria; p__Firmicutes; c__Clostridia; o__Clostridiales; f__; g__; s__	0.444444	0.736652	0	0	2	0	2	0	0	0	0	0	0	0
New.CleanUp.ReferenceOTU29015	k__Bacteria; p__Firmicutes; c__Clostridia; o__Clostridiales; f__Ruminococcaceae; g__Oscillospira; s__	0.444444	0.736652	0	0	0	0	0	0	0	1	1	0	0	0
New.CleanUp.ReferenceOTU29021	k__Bacteria; p__Firmicutes; c__Clostridia; o__Clostridiales; f__Ruminococcaceae; g__Oscillospira; s__	0.444444	0.736652	0	0	0	0	0	1	0	0	1	0	0	0
New.CleanUp.ReferenceOTU29129	k__Bacteria; p__Firmicutes; c__Clostridia; o__Clostridiales; f__Ruminococcaceae; g__Oscillospira; s__	0.444444	0.736652	0	0	0	0	0	1	1	0	0	0	0	0
New.CleanUp.ReferenceOTU29144	k__Bacteria; p__Firmicutes; c__Clostridia; o__Clostridiales; f__Ruminococcaceae; g__Oscillospira; s__	0.444444	0.736652	0	0	0	0	0	1	1	0	0	0	0	0
New.CleanUp.ReferenceOTU29195	k__Bacteria; p__Verrucomicrobia; c__Verrucomicrobiae; o__Verrucomicrobiales; f__Verrucomicrobiaceae; g__Akkermansia; s__muciniphila	0.444444	0.736652	3	0	0	1	0	0	0	0	0	0	0	0
New.CleanUp.ReferenceOTU29234	k__Bacteria; p__Bacteroidetes; c__Bacteroidia; o__Bacteroidales; f__Porphyromonadaceae; g__Parabacteroides; s__	0.444444	0.736652	0	0	1	0	1	0	0	0	0	0	0	0
New.CleanUp.ReferenceOTU29503	k__Bacteria; p__Firmicutes; c__Clostridia; o__Clostridiales; f__; g__; s__	0.444444	0.736652	0	0	0	0	0	1	0	1	0	0	0	0
New.CleanUp.ReferenceOTU29507	k__Bacteria; p__Firmicutes; c__Clostridia; o__Clostridiales; f__Ruminococcaceae; g__Oscillospira; s__	0.444444	0.736652	1	0	0	1	0	0	0	0	0	0	0	0
New.CleanUp.ReferenceOTU2956	k__Bacteria; p__Bacteroidetes; c__Bacteroidia; o__Bacteroidales; f__S24-7; g__; s__	0.444444	0.736652	0	0	0	0	0	0	1	1	0	0	0	0
New.CleanUp.ReferenceOTU29598	k__Bacteria; p__Firmicutes; c__Clostridia; o__Clostridiales; f__; g__; s__	0.444444	0.736652	0	5	2	0	0	0	0	0	0	0	0	0
New.CleanUp.ReferenceOTU29609	k__Bacteria; p__Bacteroidetes; c__Bacteroidia; o__Bacteroidales; f__Porphyromonadaceae; g__Parabacteroides; s__	0.444444	0.736652	0	0	0	0	0	1	0	0	0	1	0	0
New.CleanUp.ReferenceOTU29685	k__Bacteria; p__Bacteroidetes; c__Bacteroidia; o__Bacteroidales; f__Porphyromonadaceae; g__Parabacteroides; s__	0.444444	0.736652	0	3	0	0	1	0	0	0	0	0	0	0
New.CleanUp.ReferenceOTU29690	k__Bacteria; p__Firmicutes; c__Clostridia; o__Clostridiales; f__Lachnospiraceae; g__; s__	0.444444	0.736652	0	0	0	0	0	1	0	0	0	1	0	0
New.CleanUp.ReferenceOTU29699	k__Bacteria; p__Firmicutes; c__Clostridia; o__Clostridiales; f__Ruminococcaceae; g__; s__	0.444444	0.736652	0	0	0	0	0	0	0	2	1	0	0	0
New.CleanUp.ReferenceOTU29736	k__Bacteria; p__Verrucomicrobia; c__Verrucomicrobiae; o__Verrucomicrobiales; f__Verrucomicrobiaceae; g__Akkermansia; s__muciniphila	0.444444	0.736652	0	0	1	1	0	0	0	0	0	0	0	0
New.CleanUp.ReferenceOTU29959	k__Bacteria; p__Firmicutes; c__Clostridia; o__Clostridiales; f__; g__; s__	0.444444	0.736652	0	1	3	0	0	0	0	0	0	0	0	0
New.CleanUp.ReferenceOTU30035	k__Bacteria; p__Firmicutes; c__Clostridia; o__Clostridiales; f__Ruminococcaceae	0.444444	0.736652	0	0	0	0	0	1	0	0	0	1	0	0
New.CleanUp.ReferenceOTU30135	k__Bacteria; p__Firmicutes; c__Clostridia; o__Clostridiales; f__Lachnospiraceae; g__Coprococcus; s__	0.444444	0.736652	0	2	0	3	0	0	0	0	0	0	0	0
New.CleanUp.ReferenceOTU30215	k__Bacteria; p__Firmicutes; c__Clostridia; o__Clostridiales; f__; g__; s__	0.444444	0.736652	0	0	0	0	0	0	1	1	0	0	0	0
New.CleanUp.ReferenceOTU30289	k__Bacteria; p__Firmicutes; c__Clostridia; o__Clostridiales; f__; g__; s__	0.444444	0.736652	2	0	0	2	0	0	0	0	0	0	0	0
New.CleanUp.ReferenceOTU30385	k__Bacteria; p__Verrucomicrobia; c__Verrucomicrobiae; o__Verrucomicrobiales; f__Verrucomicrobiaceae; g__Akkermansia; s__muciniphila	0.444444	0.736652	0	0	0	0	0	1	0	0	0	1	0	0
New.CleanUp.ReferenceOTU30422	k__Bacteria; p__Bacteroidetes; c__Bacteroidia; o__Bacteroidales; f__Porphyromonadaceae; g__Parabacteroides; s__	0.444444	0.736652	1	0	0	0	1	0	0	0	0	0	0	0
New.CleanUp.ReferenceOTU30471	k__Bacteria; p__Deferribacteres; c__Deferribacteres; o__Deferribacterales; f__Deferribacteraceae; g__Mucispirillum; s__schaedleri	0.444444	0.736652	8	0	0	0	1	0	0	0	0	0	0	0
New.CleanUp.ReferenceOTU30481	k__Bacteria; p__Firmicutes; c__Clostridia; o__Clostridiales; f__; g__; s__	0.444444	0.736652	0	0	1	1	0	0	0	0	0	0	0	0
New.CleanUp.ReferenceOTU30519	k__Bacteria; p__Firmicutes; c__Clostridia; o__Clostridiales; f__Lachnospiraceae; g__[Ruminococcus]; s__gnavus	0.444444	0.736652	0	0	0	0	0	0	0	1	1	0	0	0
New.CleanUp.ReferenceOTU30617	k__Bacteria; p__Bacteroidetes; c__Bacteroidia; o__Bacteroidales; f__Porphyromonadaceae; g__Parabacteroides; s__	0.444444	0.736652	0	0	0	0	0	1	0	0	0	1	0	0
New.CleanUp.ReferenceOTU30669	k__Bacteria; p__Verrucomicrobia; c__Verrucomicrobiae; o__Verrucomicrobiales; f__Verrucomicrobiaceae; g__Akkermansia; s__muciniphila	0.444444	0.736652	0	1	0	1	0	0	0	0	0	0	0	0
New.CleanUp.ReferenceOTU30779	k__Bacteria; p__Bacteroidetes; c__Bacteroidia; o__Bacteroidales; f__S24-7; g__; s__	0.444444	0.736652	0	1	1	0	0	0	0	0	0	0	0	0
New.CleanUp.ReferenceOTU30828	k__Bacteria; p__Firmicutes; c__Clostridia; o__Clostridiales; f__; g__; s__	0.444444	0.736652	0	0	0	0	0	0	1	2	0	0	0	0
New.CleanUp.ReferenceOTU30836	k__Bacteria; p__Deferribacteres; c__Deferribacteres; o__Deferribacterales; f__Deferribacteraceae; g__Mucispirillum; s__schaedleri	0.444444	0.736652	1	0	0	0	1	0	0	0	0	0	0	0
New.CleanUp.ReferenceOTU30919	k__Bacteria; p__Deferribacteres; c__Deferribacteres; o__Deferribacterales; f__Deferribacteraceae; g__Mucispirillum; s__schaedleri	0.444444	0.736652	3	0	0	0	1	0	0	0	0	0	0	0
New.CleanUp.ReferenceOTU30944	k__Bacteria; p__Firmicutes; c__Clostridia; o__Clostridiales; f__Lachnospiraceae; g__[Ruminococcus]; s__gnavus	0.444444	0.736652	0	0	0	0	0	1	0	0	1	0	0	0
New.CleanUp.ReferenceOTU31200	k__Bacteria; p__Firmicutes; c__Clostridia; o__Clostridiales; f__; g__; s__	0.444444	0.736652	0	2	0	1	0	0	0	0	0	0	0	0
New.CleanUp.ReferenceOTU31317	Unassigned	0.444444	0.736652	0	0	0	0	0	2	0	3	0	0	0	0
New.CleanUp.ReferenceOTU31327	k__Bacteria; p__Firmicutes; c__Clostridia; o__Clostridiales; f__Lachnospiraceae; g__Coprococcus; s__	0.444444	0.736652	0	0	0	0	0	0	0	1	1	0	0	0
New.CleanUp.ReferenceOTU31470	k__Bacteria; p__Bacteroidetes; c__Bacteroidia; o__Bacteroidales; f__Porphyromonadaceae; g__Parabacteroides; s__	0.444444	0.736652	0	0	0	0	0	1	0	0	0	1	0	0
New.CleanUp.ReferenceOTU31516	k__Bacteria; p__Firmicutes; c__Clostridia; o__Clostridiales; f__; g__; s__	0.444444	0.736652	0	0	0	0	0	0	0	1	1	0	0	0
New.CleanUp.ReferenceOTU31593	Unassigned	0.444444	0.736652	0	0	0	0	0	3	0	0	0	1	0	0
New.CleanUp.ReferenceOTU31746	k__Bacteria; p__Firmicutes; c__Clostridia; o__Clostridiales; f__Lachnospiraceae; g__; s__	0.444444	0.736652	0	0	0	0	0	0	0	2	4	0	0	0
New.CleanUp.ReferenceOTU31888	k__Bacteria; p__Bacteroidetes; c__Bacteroidia; o__Bacteroidales; f__Porphyromonadaceae; g__Parabacteroides; s__	0.444444	0.736652	0	0	0	0	0	0	1	0	0	1	0	0
New.CleanUp.ReferenceOTU31922	k__Bacteria; p__Bacteroidetes; c__Bacteroidia; o__Bacteroidales; f__Porphyromonadaceae; g__Parabacteroides; s__	0.444444	0.736652	0	0	0	0	0	0	0	1	0	1	0	0
New.CleanUp.ReferenceOTU3195	k__Bacteria; p__Firmicutes; c__Clostridia; o__Clostridiales; f__Clostridiaceae; g__; s__	0.444444	0.736652	0	0	1	0	1	0	0	0	0	0	0	0
New.CleanUp.ReferenceOTU31953	k__Bacteria; p__Firmicutes; c__Clostridia; o__Clostridiales; f__Clostridiaceae; g__; s__	0.444444	0.736652	0	0	1	2	0	0	0	0	0	0	0	0
New.CleanUp.ReferenceOTU32066	k__Bacteria; p__Firmicutes; c__Clostridia; o__Clostridiales; f__Ruminococcaceae	0.444444	0.736652	0	0	0	0	0	1	0	0	0	1	0	0
New.CleanUp.ReferenceOTU32251	k__Bacteria; p__Firmicutes; c__Clostridia; o__Clostridiales; f__; g__; s__	0.444444	0.736652	1	1	0	0	0	0	0	0	0	0	0	0
New.CleanUp.ReferenceOTU32258	k__Bacteria; p__Firmicutes; c__Clostridia; o__Clostridiales; f__Clostridiaceae; g__; s__	0.444444	0.736652	1	0	0	0	1	0	0	0	0	0	0	0
New.CleanUp.ReferenceOTU32283	k__Bacteria; p__Firmicutes; c__Clostridia; o__Clostridiales; f__Ruminococcaceae; g__; s__	0.444444	0.736652	0	0	0	0	0	1	0	1	0	0	0	0
New.CleanUp.ReferenceOTU32379	k__Bacteria; p__Bacteroidetes; c__Bacteroidia; o__Bacteroidales; f__Porphyromonadaceae; g__Parabacteroides; s__	0.444444	0.736652	1	0	2	0	0	0	0	0	0	0	0	0
New.CleanUp.ReferenceOTU32447	k__Bacteria; p__Bacteroidetes; c__Bacteroidia; o__Bacteroidales; f__S24-7; g__; s__	0.444444	0.736652	0	1	0	1	0	0	0	0	0	0	0	0
New.CleanUp.ReferenceOTU32527	k__Bacteria; p__Firmicutes; c__Clostridia; o__Clostridiales; f__; g__; s__	0.444444	0.736652	0	0	0	0	0	0	2	0	1	0	0	0
New.CleanUp.ReferenceOTU32577	k__Bacteria; p__Firmicutes; c__Clostridia; o__Clostridiales; f__; g__; s__	0.444444	0.736652	0	1	0	2	0	0	0	0	0	0	0	0
New.CleanUp.ReferenceOTU32625	Unassigned	0.444444	0.736652	0	0	1	0	1	0	0	0	0	0	0	0
New.CleanUp.ReferenceOTU32774	k__Bacteria; p__Verrucomicrobia; c__Verrucomicrobiae; o__Verrucomicrobiales; f__Verrucomicrobiaceae; g__Akkermansia; s__muciniphila	0.444444	0.736652	1	1	0	0	0	0	0	0	0	0	0	0
New.CleanUp.ReferenceOTU32807	k__Bacteria; p__Bacteroidetes; c__Bacteroidia; o__Bacteroidales; f__S24-7; g__; s__	0.444444	0.736652	1	0	0	0	1	0	0	0	0	0	0	0
New.CleanUp.ReferenceOTU32859	k__Bacteria; p__Firmicutes; c__Clostridia; o__Clostridiales; f__Clostridiaceae; g__; s__	0.444444	0.736652	3	0	0	0	1	0	0	0	0	0	0	0
New.CleanUp.ReferenceOTU32876	k__Bacteria; p__Firmicutes; c__Clostridia; o__Clostridiales; f__; g__; s__	0.444444	0.736652	1	0	0	0	2	0	0	0	0	0	0	0
New.CleanUp.ReferenceOTU32884	k__Bacteria; p__Firmicutes; c__Clostridia; o__Clostridiales; f__; g__; s__	0.444444	0.736652	0	0	0	0	0	0	1	0	1	0	0	0
New.CleanUp.ReferenceOTU32906	k__Bacteria; p__Verrucomicrobia; c__Verrucomicrobiae; o__Verrucomicrobiales; f__Verrucomicrobiaceae; g__Akkermansia; s__muciniphila	0.444444	0.736652	1	0	0	1	0	0	0	0	0	0	0	0
New.CleanUp.ReferenceOTU32956	k__Bacteria; p__Firmicutes; c__Clostridia; o__Clostridiales; f__Lachnospiraceae; g__; s__	0.444444	0.736652	0	0	0	0	0	1	0	1	0	0	0	0
New.CleanUp.ReferenceOTU33020	k__Bacteria; p__Firmicutes; c__Clostridia; o__Clostridiales; f__; g__; s__	0.444444	0.736652	0	0	0	0	0	0	1	0	1	0	0	0
New.CleanUp.ReferenceOTU33025	k__Bacteria; p__Firmicutes; c__Clostridia; o__Clostridiales; f__Ruminococcaceae; g__; s__	0.444444	0.736652	1	0	0	2	0	0	0	0	0	0	0	0
New.CleanUp.ReferenceOTU33138	k__Bacteria; p__Firmicutes; c__Clostridia; o__Clostridiales; f__; g__; s__	0.444444	0.736652	0	1	0	1	0	0	0	0	0	0	0	0
New.CleanUp.ReferenceOTU33293	k__Bacteria; p__Firmicutes; c__Clostridia; o__Clostridiales; f__Lachnospiraceae; g__; s__	0.444444	0.736652	0	0	0	0	0	0	0	1	1	0	0	0
New.CleanUp.ReferenceOTU33418	k__Bacteria; p__Firmicutes; c__Clostridia; o__Clostridiales; f__Ruminococcaceae; g__; s__	0.444444	0.736652	0	0	0	0	0	0	0	3	1	0	0	0
New.CleanUp.ReferenceOTU3347	k__Bacteria; p__Firmicutes; c__Clostridia; o__Clostridiales; f__Lachnospiraceae; g__; s__	0.444444	0.736652	1	1	0	0	0	0	0	0	0	0	0	0
New.CleanUp.ReferenceOTU33530	k__Bacteria; p__Firmicutes; c__Clostridia; o__Clostridiales; f__; g__; s__	0.444444	0.736652	0	1	1	0	0	0	0	0	0	0	0	0
New.CleanUp.ReferenceOTU33628	k__Bacteria; p__Firmicutes; c__Clostridia; o__Clostridiales; f__Ruminococcaceae; g__; s__	0.444444	0.736652	0	0	0	0	0	1	0	0	0	1	0	0
New.CleanUp.ReferenceOTU33635	k__Bacteria; p__Verrucomicrobia; c__Verrucomicrobiae; o__Verrucomicrobiales; f__Verrucomicrobiaceae; g__Akkermansia; s__muciniphila	0.444444	0.736652	1	0	0	0	1	0	0	0	0	0	0	0
New.CleanUp.ReferenceOTU33668	k__Bacteria; p__Firmicutes; c__Clostridia; o__Clostridiales; f__Ruminococcaceae	0.444444	0.736652	0	0	0	0	0	0	0	2	1	0	0	0
New.CleanUp.ReferenceOTU33686	k__Bacteria; p__Bacteroidetes; c__Bacteroidia; o__Bacteroidales; f__Porphyromonadaceae; g__Parabacteroides; s__	0.444444	0.736652	1	0	0	0	1	0	0	0	0	0	0	0
New.CleanUp.ReferenceOTU3373	k__Bacteria; p__Firmicutes; c__Clostridia; o__Clostridiales; f__Ruminococcaceae; g__; s__	0.444444	0.736652	0	0	0	0	0	1	1	0	0	0	0	0
New.CleanUp.ReferenceOTU33740	k__Bacteria; p__Firmicutes; c__Clostridia; o__Clostridiales; f__; g__; s__	0.444444	0.736652	0	0	0	0	0	0	0	10	0	1	0	0
New.CleanUp.ReferenceOTU33750	Unassigned	0.444444	0.736652	0	0	0	0	0	1	0	0	0	2	0	0
New.CleanUp.ReferenceOTU33868	k__Bacteria; p__Bacteroidetes; c__Bacteroidia; o__Bacteroidales; f__S24-7; g__; s__	0.444444	0.736652	0	1	0	1	0	0	0	0	0	0	0	0
New.CleanUp.ReferenceOTU33974	k__Bacteria; p__Firmicutes; c__Clostridia; o__Clostridiales; f__; g__; s__	0.444444	0.736652	0	0	0	0	0	1	1	0	0	0	0	0
New.CleanUp.ReferenceOTU34028	k__Bacteria; p__Firmicutes; c__Clostridia; o__Clostridiales; f__Ruminococcaceae; g__Oscillospira; s__	0.444444	0.736652	0	0	0	0	0	1	0	1	0	0	0	0
New.CleanUp.ReferenceOTU34045	k__Bacteria; p__Firmicutes; c__Clostridia; o__Clostridiales; f__; g__; s__	0.444444	0.736652	2	0	2	0	0	0	0	0	0	0	0	0
New.CleanUp.ReferenceOTU34071	k__Bacteria; p__Bacteroidetes; c__Bacteroidia; o__Bacteroidales; f__Porphyromonadaceae; g__Parabacteroides; s__	0.444444	0.736652	0	0	0	0	0	1	0	0	0	1	0	0
New.CleanUp.ReferenceOTU34104	k__Bacteria; p__Bacteroidetes; c__Bacteroidia; o__Bacteroidales; f__S24-7; g__; s__	0.444444	0.736652	1	1	0	0	0	0	0	0	0	0	0	0
New.CleanUp.ReferenceOTU34153	k__Bacteria; p__Firmicutes; c__Clostridia; o__Clostridiales; f__Lachnospiraceae; g__; s__	0.444444	0.736652	0	0	0	0	0	0	0	1	0	1	0	0
New.CleanUp.ReferenceOTU34160	k__Bacteria; p__Bacteroidetes; c__Bacteroidia; o__Bacteroidales; f__Porphyromonadaceae; g__Parabacteroides; s__	0.444444	0.736652	2	1	0	0	0	0	0	0	0	0	0	0
New.CleanUp.ReferenceOTU34202	k__Bacteria; p__Bacteroidetes; c__Bacteroidia; o__Bacteroidales; f__S24-7; g__; s__	0.444444	0.736652	0	1	0	1	0	0	0	0	0	0	0	0
New.CleanUp.ReferenceOTU34210	k__Bacteria; p__Firmicutes; c__Clostridia; o__Clostridiales; f__; g__; s__	0.444444	0.736652	0	0	0	0	0	1	0	0	0	1	0	0
New.CleanUp.ReferenceOTU34250	k__Bacteria; p__Firmicutes; c__Clostridia; o__Clostridiales; f__Lachnospiraceae; g__Coprococcus; s__	0.444444	0.736652	0	0	0	1	1	0	0	0	0	0	0	0
New.CleanUp.ReferenceOTU34266	k__Bacteria; p__Firmicutes; c__Clostridia; o__Clostridiales; f__Ruminococcaceae; g__; s__	0.444444	0.736652	0	0	0	0	0	2	0	1	0	0	0	0
New.CleanUp.ReferenceOTU34340	k__Bacteria; p__Firmicutes; c__Clostridia; o__Clostridiales; f__; g__; s__	0.444444	0.736652	1	0	0	1	0	0	0	0	0	0	0	0
New.CleanUp.ReferenceOTU34405	k__Bacteria; p__Firmicutes; c__Clostridia; o__Clostridiales; f__Ruminococcaceae; g__Oscillospira; s__	0.444444	0.736652	0	0	1	1	0	0	0	0	0	0	0	0
New.CleanUp.ReferenceOTU34455	k__Bacteria; p__Bacteroidetes; c__Bacteroidia; o__Bacteroidales; f__S24-7; g__; s__	0.444444	0.736652	0	0	0	2	2	0	0	0	0	0	0	0
New.CleanUp.ReferenceOTU34570	k__Bacteria; p__Verrucomicrobia; c__Verrucomicrobiae; o__Verrucomicrobiales; f__Verrucomicrobiaceae; g__Akkermansia; s__muciniphila	0.444444	0.736652	1	0	1	0	0	0	0	0	0	0	0	0
New.CleanUp.ReferenceOTU34584	k__Bacteria; p__Bacteroidetes; c__Bacteroidia; o__Bacteroidales; f__Porphyromonadaceae; g__Parabacteroides; s__	0.444444	0.736652	0	0	0	0	0	1	0	1	0	0	0	0
New.CleanUp.ReferenceOTU34681	k__Bacteria; p__Firmicutes; c__Clostridia; o__Clostridiales; f__; g__; s__	0.444444	0.736652	0	0	0	0	0	0	0	1	1	0	0	0
New.CleanUp.ReferenceOTU34872	k__Bacteria; p__Firmicutes; c__Clostridia; o__Clostridiales; f__; g__; s__	0.444444	0.736652	0	0	0	0	0	1	0	1	0	0	0	0
New.CleanUp.ReferenceOTU34918	k__Bacteria; p__Bacteroidetes; c__Bacteroidia; o__Bacteroidales; f__S24-7; g__; s__	0.444444	0.736652	0	1	1	0	0	0	0	0	0	0	0	0
New.CleanUp.ReferenceOTU35077	k__Bacteria; p__Firmicutes; c__Clostridia; o__Clostridiales; f__Lachnospiraceae; g__; s__	0.444444	0.736652	0	0	0	0	0	1	0	1	0	0	0	0
New.CleanUp.ReferenceOTU35078	k__Bacteria; p__Firmicutes; c__Clostridia; o__Clostridiales; f__; g__; s__	0.444444	0.736652	0	0	0	0	0	0	1	0	1	0	0	0
New.CleanUp.ReferenceOTU3516	k__Bacteria; p__Firmicutes; c__Clostridia; o__Clostridiales; f__Ruminococcaceae; g__; s__	0.444444	0.736652	0	0	0	0	0	0	0	1	2	0	0	0
New.CleanUp.ReferenceOTU35249	k__Bacteria; p__Bacteroidetes; c__Bacteroidia; o__Bacteroidales; f__Porphyromonadaceae; g__Parabacteroides; s__	0.444444	0.736652	0	0	0	1	1	0	0	0	0	0	0	0
New.CleanUp.ReferenceOTU35405	k__Bacteria; p__Firmicutes; c__Clostridia; o__Clostridiales; f__; g__; s__	0.444444	0.736652	0	0	0	0	0	0	0	1	1	0	0	0
New.CleanUp.ReferenceOTU35423	k__Bacteria; p__Firmicutes; c__Clostridia; o__Clostridiales; f__; g__; s__	0.444444	0.736652	0	0	0	0	0	0	0	2	1	0	0	0
New.CleanUp.ReferenceOTU35470	k__Bacteria; p__Firmicutes; c__Clostridia; o__Clostridiales; f__Ruminococcaceae; g__; s__	0.444444	0.736652	0	0	0	0	0	0	0	2	0	1	0	0
New.CleanUp.ReferenceOTU35513	k__Bacteria; p__Firmicutes; c__Clostridia; o__Clostridiales; f__; g__; s__	0.444444	0.736652	0	0	0	0	0	3	1	0	0	0	0	0
New.CleanUp.ReferenceOTU35526	k__Bacteria; p__Firmicutes; c__Clostridia; o__Clostridiales; f__Ruminococcaceae; g__Oscillospira; s__	0.444444	0.736652	0	1	0	1	0	0	0	0	0	0	0	0
New.CleanUp.ReferenceOTU35644	k__Bacteria; p__Verrucomicrobia; c__Verrucomicrobiae; o__Verrucomicrobiales; f__Verrucomicrobiaceae; g__Akkermansia; s__muciniphila	0.444444	0.736652	1	0	1	0	0	0	0	0	0	0	0	0
New.CleanUp.ReferenceOTU35726	k__Bacteria; p__Firmicutes; c__Clostridia; o__Clostridiales; f__; g__; s__	0.444444	0.736652	0	1	0	3	0	0	0	0	0	0	0	0
New.CleanUp.ReferenceOTU35727	k__Bacteria; p__Firmicutes; c__Clostridia; o__Clostridiales; f__; g__; s__	0.444444	0.736652	0	0	0	0	0	0	0	1	1	0	0	0
New.CleanUp.ReferenceOTU35730	k__Bacteria; p__Verrucomicrobia; c__Verrucomicrobiae; o__Verrucomicrobiales; f__Verrucomicrobiaceae; g__Akkermansia; s__muciniphila	0.444444	0.736652	0	0	0	1	2	0	0	0	0	0	0	0
New.CleanUp.ReferenceOTU3579	k__Bacteria; p__Firmicutes; c__Clostridia; o__Clostridiales; f__; g__; s__	0.444444	0.736652	0	0	0	0	0	1	0	1	0	0	0	0
New.CleanUp.ReferenceOTU35869	k__Bacteria; p__Firmicutes; c__Clostridia; o__Clostridiales; f__; g__; s__	0.444444	0.736652	1	0	1	0	0	0	0	0	0	0	0	0
[truncated: 2,685 more rows]

## Sheet: Sheet1
Median fold change
Inf
Inf
0.111111
Inf
Inf
Inf
Inf
Inf
0.111111
1.73333
Inf
Inf
Inf
Inf
Inf
Inf
Inf
Inf
Inf
Inf
Inf
0.321429
Inf
0.166667
0.515625
0.25
Inf
0.0625
Inf
0.0909091
Inf
Inf
Inf
5
Inf
Inf
Inf
Inf
Inf
Inf
Inf
Inf
Inf
5.6
Inf
Inf
0.0508321
Inf
Inf
Inf
Inf
Inf
Inf
Inf
0.310345
Inf
Inf
Inf
0.175439
Inf
1059
Inf
0.2
0.662393
Inf
0.333333
Inf
Inf
35.6667
Inf
Inf
Inf
Inf
Inf
1304.5
Inf
Inf
0.125
Inf
0.259259
Inf
Inf
6.82759
#DIV/0!
0.121762
Inf
Inf
0.100334
0.0243902
Inf
Inf
Inf
Inf
Inf
Inf
Inf
Inf
Inf
0.0828848
0.0344828
7.5
0.114206
234
Inf
0.295455
Inf
0.103896
0.00312744
0.153846
Inf
Inf
Inf
0.0588235
Inf
Inf
0.204212
Inf
Inf
Inf
Inf
Inf
0.00904977
Inf
Inf
Inf
Inf
Inf
Inf
Inf
Inf
Inf
Inf
Inf
Inf
Inf
29
Inf
Inf
47
17.6429
Inf
0.0490956
Inf
Inf
Inf
Inf
Inf
Inf
Inf
Inf
Inf
0.0833333
Inf
0.0172414
17.6
Inf
0.0975992
0.04
Inf
0.0108974
Inf
Inf
38
Inf
Inf
Inf
Inf
Inf
Inf
Inf
Inf
Inf
Inf
Inf
Inf
0.00660066
Inf
Inf
0.101266
Inf
0.166667
Inf
Inf
Inf
431
Inf
Inf
0.037037
47.3333
7
Inf
Inf
Inf
Inf
Inf
Inf
49
Inf
Inf
Inf
Inf
Inf
0.0405405
Inf
Inf
Inf
0.0206186
0.10066
0.0124748
Inf
97.75
0.229167
Inf
Inf
Inf
Inf
Inf
18
Inf
Inf
Inf
0.0526316
Inf
Inf
Inf
Inf
0.490421
Inf
0.128205
Inf
Inf
0.0833333
0.287417
Inf
Inf
Inf
0.133333
36.34
Inf
0.111111
Inf
0.230769
0.0384615
Inf
Inf
Inf
Inf
Inf
Inf
Inf
Inf
0.382353
Inf
