# Supplementary material for: Aging and serum MCP-1 are associated with gut microbiome composition in a murine model
Source: PeerJ. 2016 Mar 31;4:e1854. doi: 10.7717/peerj.1854 (PMC4824877; doi:10.7717/peerj.1854)
Supplement: Table S2 [file peerj-04-1854-s002.xlsx]

## Sheet: Legend
Additional file 2. Correlation analysis of OTU abundance and serum MCP-1 levels completed using Kendall Tau Correlation Test. OTU's filtered based on presence in 50% of samples. Kendall Tau Correlation Coefficients, along with corresponding p-values and q-values. Individual mouse serum MCP-1 levels are also listed.

## Sheet: Tau Coefficients
OTU_ID	kendall_tau	p_value	q_value	taxa_all
322609	-0.820768	0.00226217	0.126864	k__Bacteria; p__Firmicutes; c__Clostridia; o__Clostridiales; f__; g__; s__
273958	-0.793091	0.0036182	0.126864	k__Bacteria; p__Firmicutes; c__Clostridia; o__Clostridiales; f__; g__; s__
New.CleanUp.ReferenceOTU38613	-0.793091	0.0036182	0.126864	k__Bacteria; p__Firmicutes; c__Erysipelotrichi; o__Erysipelotrichales; f__Erysipelotrichaceae; g__Clostridium
New.CleanUp.ReferenceOTU79916	-0.775632	0.00496827	0.126864	k__Bacteria; p__Firmicutes; c__Clostridia; o__Clostridiales; f__Ruminococcaceae; g__Oscillospira; s__
188973	-0.764471	0.00516937	0.126864	k__Bacteria; p__Firmicutes; c__Clostridia; o__Clostridiales; f__Lachnospiraceae; g__Coprococcus; s__
266946	-0.764471	0.00516937	0.126864	k__Bacteria; p__Firmicutes; c__Clostridia; o__Clostridiales; f__Lachnospiraceae; g__Ruminococcus; s__gnavus
261016	-0.764471	0.00516937	0.126864	k__Bacteria; p__Firmicutes; c__Clostridia; o__Clostridiales; f__Lachnospiraceae; g__Blautia; s__
New.CleanUp.ReferenceOTU20636	-0.764471	0.00516937	0.126864	k__Bacteria; p__Firmicutes; c__Clostridia; o__Clostridiales; f__; g__; s__
New.CleanUp.ReferenceOTU15984	-0.75813	0.00531055	0.126864	k__Bacteria; p__Firmicutes; c__Clostridia; o__Clostridiales; f__Ruminococcaceae
New.CleanUp.ReferenceOTU23783	-0.75813	0.00505118	0.126864	k__Bacteria; p__Firmicutes; c__Clostridia; o__Clostridiales; f__Ruminococcaceae; g__Oscillospira; s__
New.ReferenceOTU107	-0.753411	0.00455771	0.126864	k__Bacteria; p__Firmicutes; c__Clostridia; o__Clostridiales; f__; g__; s__
New.CleanUp.ReferenceOTU73659	-0.753411	0.00455771	0.126864	k__Bacteria; p__Firmicutes; c__Bacilli; o__Lactobacillales; f__Lactobacillaceae; g__Lactobacillus; s__
276996	-0.75	0.00391311	0.126864	k__Bacteria; p__Firmicutes; c__Clostridia; o__Clostridiales; f__Ruminococcaceae; g__Oscillospira; s__
New.ReferenceOTU183	-0.75	0.00391311	0.126864	k__Bacteria; p__Verrucomicrobia; c__Verrucomicrobiae; o__Verrucomicrobiales; f__Verrucomicrobiaceae; g__Akkermansia; s__muciniphila
3750373	-0.749777	0.00668345	0.126864	k__Bacteria; p__Firmicutes; c__Clostridia; o__Clostridiales; f__Lachnospiraceae; g__Ruminococcus; s__gnavus
269091	-0.749777	0.00668345	0.126864	k__Bacteria; p__Firmicutes; c__Clostridia; o__Clostridiales; f__; g__; s__
260828	-0.749777	0.00668345	0.126864	k__Bacteria; p__Firmicutes; c__Clostridia; o__Clostridiales; f__; g__; s__
4379247	-0.743522	0.00648996	0.126864	k__Bacteria; p__Firmicutes; c__Bacilli; o__Lactobacillales; f__Lactobacillaceae; g__Lactobacillus; s__
New.CleanUp.ReferenceOTU22558	-0.734809	0.00860315	0.126864	k__Bacteria; p__Firmicutes; c__Clostridia; o__Clostridiales; f__Ruminococcaceae; g__Oscillospira; s__
New.CleanUp.ReferenceOTU79926	-0.734809	0.00860315	0.126864	k__Bacteria; p__Firmicutes; c__Clostridia; o__Clostridiales; f__Ruminococcaceae; g__Oscillospira; s__
New.ReferenceOTU145	-0.728652	0.00811307	0.126864	k__Bacteria; p__Firmicutes; c__Clostridia; o__Clostridiales; f__Lachnospiraceae; g__Coprococcus; s__
New.ReferenceOTU205	-0.724207	0.00695913	0.126864	k__Bacteria; p__Firmicutes; c__Clostridia; o__Clostridiales; f__Ruminococcaceae; g__; s__
New.ReferenceOTU206	-0.724207	0.00745689	0.126864	k__Bacteria; p__Firmicutes; c__Clostridia; o__Clostridiales; f__Ruminococcaceae; g__Oscillospira; s__
New.CleanUp.ReferenceOTU11054	-0.724207	0.00695913	0.126864	k__Bacteria; p__Firmicutes; c__Clostridia; o__Clostridiales; f__Ruminococcaceae; g__; s__
New.CleanUp.ReferenceOTU11912	-0.719552	0.0107706	0.126864	k__Bacteria; p__Firmicutes; c__Clostridia; o__Clostridiales; f__Ruminococcaceae
New.CleanUp.ReferenceOTU42657	-0.719552	0.0107706	0.126864	k__Bacteria; p__Firmicutes; c__Clostridia; o__Clostridiales; f__; g__; s__
New.CleanUp.ReferenceOTU80700	-0.719552	0.0107706	0.126864	k__Bacteria; p__Firmicutes; c__Clostridia; o__Clostridiales; f__Ruminococcaceae; g__; s__
New.ReferenceOTU212	-0.719146	0.00537125	0.126864	k__Bacteria; p__Verrucomicrobia; c__Verrucomicrobiae; o__Verrucomicrobiales; f__Verrucomicrobiaceae; g__Akkermansia; s__muciniphila
352008	-0.713506	0.00922938	0.126864	k__Bacteria; p__Firmicutes; c__Clostridia; o__Clostridiales; f__Lachnospiraceae; g__Ruminococcus; s__gnavus
264646	-0.713506	0.00922938	0.126864	k__Bacteria; p__Firmicutes; c__Clostridia; o__Clostridiales; f__Ruminococcaceae; g__; s__
309916	-0.713506	0.00922938	0.126864	k__Bacteria; p__Firmicutes; c__Clostridia; o__Clostridiales; f__Lachnospiraceae; g__Ruminococcus; s__gnavus
New.CleanUp.ReferenceOTU13664	-0.713506	0.0103471	0.126864	k__Bacteria; p__Firmicutes; c__Clostridia; o__Clostridiales; f__Ruminococcaceae; g__; s__
New.CleanUp.ReferenceOTU57922	-0.713506	0.0103471	0.126864	Unassigned
New.ReferenceOTU223	-0.709218	0.00927551	0.126864	k__Bacteria; p__Firmicutes; c__Clostridia; o__Clostridiales; f__Ruminococcaceae; g__Oscillospira; s__
313069	-0.706322	0.00796094	0.126864	k__Bacteria; p__Firmicutes; c__Clostridia; o__Clostridiales; f__Clostridiaceae; g__; s__
New.CleanUp.ReferenceOTU36556	-0.706322	0.00796094	0.126864	k__Bacteria; p__Firmicutes; c__Clostridia; o__Clostridiales; f__Ruminococcaceae; g__Ruminococcus; s__
New.CleanUp.ReferenceOTU71324	-0.706322	0.00796094	0.126864	k__Bacteria; p__Firmicutes; c__Clostridia; o__Clostridiales; f__Ruminococcaceae; g__; s__
348785	-0.704545	0.00683528	0.126864	k__Bacteria; p__Firmicutes; c__Clostridia; o__Clostridiales; f__; g__; s__
New.CleanUp.ReferenceOTU9012	-0.698068	0.011786	0.126864	k__Bacteria; p__Firmicutes; c__Clostridia; o__Clostridiales; f__; g__; s__
New.CleanUp.ReferenceOTU42707	-0.698068	0.011786	0.126864	k__Bacteria; p__Firmicutes; c__Clostridia; o__Clostridiales; f__; g__; s__
New.CleanUp.ReferenceOTU54991	-0.698068	0.011786	0.126864	k__Bacteria; p__Firmicutes; c__Clostridia; o__Clostridiales; f__Ruminococcaceae; g__; s__
New.CleanUp.ReferenceOTU68860	-0.693954	0.0112698	0.126864	k__Bacteria; p__Firmicutes; c__Clostridia; o__Clostridiales; f__; g__; s__
New.CleanUp.ReferenceOTU63862	-0.689701	0.00866341	0.126864	k__Bacteria; p__Firmicutes; c__Clostridia; o__Clostridiales; f__Lachnospiraceae; g__; s__
New.CleanUp.ReferenceOTU23808	-0.682323	0.0149822	0.126864	k__Bacteria; p__Firmicutes; c__Clostridia; o__Clostridiales; f__Ruminococcaceae; g__; s__
New.CleanUp.ReferenceOTU61659	-0.678401	0.0139623	0.126864	k__Bacteria; p__Firmicutes; c__Erysipelotrichi; o__Erysipelotrichales; f__Erysipelotrichaceae; g__; s__
337727	-0.675926	0.0119821	0.126864	k__Bacteria; p__Firmicutes; c__Clostridia; o__Clostridiales; f__Ruminococcaceae; g__Oscillospira; s__
New.CleanUp.ReferenceOTU82451	-0.675926	0.0124795	0.126864	k__Bacteria; p__Firmicutes; c__Clostridia; o__Clostridiales; f__; g__; s__
273737	-0.674601	0.0107171	0.126864	k__Bacteria; p__Firmicutes; c__Clostridia; o__Clostridiales; f__Ruminococcaceae; g__; s__
198194	-0.6742	0.00920684	0.126864	k__Bacteria; p__Firmicutes; c__Clostridia; o__Clostridiales; f__Ruminococcaceae; g__Oscillospira; s__
192598	-0.6742	0.00920684	0.126864	k__Bacteria; p__Firmicutes; c__Clostridia; o__Clostridiales; f__Ruminococcaceae; g__Ruminococcus; s__
New.CleanUp.ReferenceOTU60747	-0.672214	0.0154513	0.126864	k__Bacteria; p__Firmicutes; c__Clostridia; o__Clostridiales; f__Ruminococcaceae; g__; s__
New.CleanUp.ReferenceOTU66376	-0.671871	0.0208148	0.132419	k__Bacteria; p__Firmicutes; c__Clostridia; o__Clostridiales; f__Ruminococcaceae; g__Ruminococcus; s__
New.CleanUp.ReferenceOTU50850	-0.666252	0.0185778	0.132419	k__Bacteria; p__Firmicutes; c__Clostridia; o__Clostridiales; f__; g__; s__
259087	-0.662541	0.0159267	0.126864	k__Bacteria; p__Firmicutes; c__Clostridia; o__Clostridiales; f__Lachnospiraceae; g__Ruminococcus; s__gnavus
168145	-0.662541	0.0159267	0.126864	k__Bacteria; p__Firmicutes; c__Clostridia; o__Clostridiales; f__Ruminococcaceae; g__; s__
264846	-0.662541	0.0159267	0.126864	k__Bacteria; p__Firmicutes; c__Clostridia; o__Clostridiales; f__; g__; s__
273937	-0.662541	0.0159267	0.126864	k__Bacteria; p__Firmicutes; c__Clostridia; o__Clostridiales; f__; g__; s__
New.ReferenceOTU122	-0.662541	0.0159267	0.126864	k__Bacteria; p__Firmicutes; c__Clostridia; o__Clostridiales; f__; g__; s__
New.ReferenceOTU172	-0.662541	0.0159267	0.126864	k__Bacteria; p__Firmicutes; c__Clostridia; o__Clostridiales; f__Ruminococcaceae; g__; s__
New.CleanUp.ReferenceOTU55439	-0.662541	0.0175926	0.132419	k__Bacteria; p__Firmicutes; c__Clostridia; o__Clostridiales; f__Ruminococcaceae; g__; s__
350717	-0.660307	0.0156967	0.126864	k__Bacteria; p__Firmicutes; c__Clostridia; o__Clostridiales; f__; g__; s__
New.CleanUp.ReferenceOTU27814	-0.660307	0.0156967	0.126864	k__Bacteria; p__Verrucomicrobia; c__Verrucomicrobiae; o__Verrucomicrobiales; f__Verrucomicrobiaceae; g__Akkermansia; s__muciniphila
New.CleanUp.ReferenceOTU31342	-0.660307	0.0151022	0.126864	k__Bacteria; p__Firmicutes; c__Clostridia; o__Clostridiales; f__; g__; s__
New.CleanUp.ReferenceOTU68859	-0.660307	0.0151022	0.126864	k__Bacteria; p__Firmicutes; c__Clostridia; o__Clostridiales; f__; g__; s__
348197	-0.659234	0.0137458	0.126864	k__Bacteria; p__Firmicutes; c__Clostridia; o__Clostridiales; f__; g__; s__
4448052	-0.659234	0.0134846	0.126864	k__Bacteria; p__Firmicutes; c__Clostridia; o__Clostridiales; f__Ruminococcaceae; g__Oscillospira; s__
New.ReferenceOTU67	-0.659234	0.0134846	0.126864	k__Bacteria; p__Firmicutes; c__Clostridia; o__Clostridiales; f__Ruminococcaceae; g__Oscillospira; s__
New.CleanUp.ReferenceOTU71089	-0.659234	0.0134846	0.126864	k__Bacteria; p__Bacteroidetes; c__Bacteroidia; o__Bacteroidales; f__Porphyromonadaceae; g__Parabacteroides; s__
260200	-0.659091	0.0115881	0.126864	k__Bacteria; p__Firmicutes; c__Clostridia; o__Clostridiales; f__; g__; s__
New.CleanUp.ReferenceOTU48651	-0.659091	0.0115881	0.126864	k__Bacteria; p__Firmicutes; c__Clostridia; o__Clostridiales; f__Ruminococcaceae
New.CleanUp.ReferenceOTU80495	-0.65608	0.0195175	0.132419	k__Bacteria; p__Firmicutes; c__Clostridia; o__Clostridiales; f__; g__; s__
New.CleanUp.ReferenceOTU67143	-0.649836	0.0234207	0.132419	k__Bacteria; p__Firmicutes; c__Clostridia; o__Clostridiales; f__; g__; s__
267996	-0.64636	0.0200849	0.132419	k__Bacteria; p__Firmicutes; c__Clostridia; o__Clostridiales; f__Lachnospiraceae; g__Ruminococcus; s__gnavus
190254	-0.64636	0.0200849	0.132419	k__Bacteria; p__Firmicutes; c__Clostridia; o__Clostridiales; f__Lachnospiraceae; g__Ruminococcus; s__gnavus
New.CleanUp.ReferenceOTU53736	-0.64636	0.0200849	0.132419	k__Bacteria; p__Firmicutes; c__Clostridia; o__Clostridiales; f__; g__; s__
New.CleanUp.ReferenceOTU7634	-0.64623	0.0254695	0.132419	k__Bacteria; p__Bacteroidetes; c__Bacteroidia; o__Bacteroidales; f__Porphyromonadaceae; g__Parabacteroides; s__
New.CleanUp.ReferenceOTU42317	-0.644386	0.0189506	0.132419	k__Bacteria; p__Firmicutes; c__Clostridia; o__Clostridiales; f__; g__; s__
New.CleanUp.ReferenceOTU69286	-0.644386	0.0189506	0.132419	k__Bacteria; p__Firmicutes; c__Clostridia; o__Clostridiales; f__; g__; s__
266413	-0.643721	0.0145246	0.126864	k__Bacteria; p__Firmicutes; c__Clostridia; o__Clostridiales; f__Lachnospiraceae; g__; s__
207252	-0.643587	0.0168943	0.132419	k__Bacteria; p__Firmicutes; c__Clostridia; o__Clostridiales; f__Ruminococcaceae; g__Oscillospira; s__
311859	-0.643587	0.0168943	0.132419	k__Bacteria; p__Firmicutes; c__Clostridia; o__Clostridiales; f__Ruminococcaceae; g__Oscillospira; s__
New.CleanUp.ReferenceOTU7208	-0.637059	0.0226599	0.132419	Unassigned
New.CleanUp.ReferenceOTU22014	-0.635851	0.0201806	0.132419	Unassigned
193444	-0.633174	0.0361451	0.140653	k__Bacteria; p__Firmicutes; c__Clostridia; o__Clostridiales; f__Lachnospiraceae; g__Dorea; s__
New.CleanUp.ReferenceOTU74804	-0.629837	0.025209	0.132419	k__Bacteria; p__Firmicutes; c__Clostridia; o__Clostridiales; f__Lachnospiraceae; g__Ruminococcus; s__gnavus
129394	-0.629253	0.0153222	0.126864	k__Bacteria; p__Firmicutes; c__Clostridia; o__Clostridiales; f__; g__; s__
321484	-0.629253	0.0153222	0.126864	k__Bacteria; p__Firmicutes; c__Clostridia; o__Clostridiales; f__Ruminococcaceae; g__Oscillospira; s__
635059	-0.629253	0.0153222	0.126864	k__Bacteria; p__Firmicutes; c__Clostridia; o__Clostridiales; f__; g__; s__
4480555	-0.629253	0.0153222	0.126864	k__Bacteria; p__Firmicutes; c__Clostridia; o__Clostridiales; f__; g__; s__
New.ReferenceOTU106	-0.629253	0.0153222	0.126864	k__Bacteria; p__Firmicutes; c__Clostridia; o__Clostridiales; f__; g__; s__
New.ReferenceOTU136	-0.628149	0.0232599	0.132419	k__Bacteria; p__Firmicutes; c__Clostridia; o__Clostridiales; f__Lachnospiraceae; g__Coprococcus; s__
272576	-0.628077	0.0178113	0.132419	k__Bacteria; p__Firmicutes; c__Clostridia; o__Clostridiales; f__Ruminococcaceae; g__Oscillospira; s__
197782	-0.628077	0.0178113	0.132419	k__Bacteria; p__Firmicutes; c__Clostridia; o__Clostridiales; f__Ruminococcaceae; g__; s__
269814	-0.615882	0.0348288	0.140653	k__Bacteria; p__Firmicutes; c__Clostridia; o__Clostridiales; f__Ruminococcaceae; g__Oscillospira; s__
New.CleanUp.ReferenceOTU11666	-0.615882	0.0348288	0.140653	k__Bacteria; p__Bacteroidetes; c__Bacteroidia; o__Bacteroidales; f__Porphyromonadaceae; g__Parabacteroides; s__
344400	-0.613636	0.0190716	0.132419	k__Bacteria; p__Firmicutes; c__Clostridia; o__Clostridiales; f__; g__; s__
New.CleanUp.ReferenceOTU68919	-0.613636	0.0190716	0.132419	k__Bacteria; p__Firmicutes; c__Clostridia; o__Clostridiales; f__; g__; s__
New.CleanUp.ReferenceOTU5924	-0.612952	0.0309482	0.137315	k__Bacteria; p__Firmicutes; c__Clostridia; o__Clostridiales; f__Ruminococcaceae; g__Oscillospira; s__
New.CleanUp.ReferenceOTU16961	-0.612952	0.0309482	0.137315	k__Bacteria; p__Firmicutes; c__Clostridia; o__Clostridiales; f__; g__; s__
275218	-0.612146	0.0221555	0.132419	k__Bacteria; p__Firmicutes; c__Clostridia; o__Clostridiales; f__Ruminococcaceae; g__; s__
259631	-0.612146	0.0221555	0.132419	k__Bacteria; p__Firmicutes; c__Clostridia; o__Clostridiales; f__; g__; s__
192180	-0.612146	0.0221555	0.132419	k__Bacteria; p__Firmicutes; c__Clostridia; o__Clostridiales; f__; g__; s__
273043	-0.611577	0.0265723	0.132419	k__Bacteria; p__Firmicutes; c__Clostridia; o__Clostridiales; f__; g__; s__
272953	-0.611577	0.0265723	0.132419	k__Bacteria; p__Firmicutes; c__Clostridia; o__Clostridiales; f__Ruminococcaceae; g__Oscillospira; s__
263272	-0.611577	0.0265723	0.132419	k__Bacteria; p__Firmicutes; c__Clostridia; o__Clostridiales; f__Ruminococcaceae; g__Ruminococcus; s__
417981	-0.611577	0.0265723	0.132419	k__Bacteria; p__Firmicutes; c__Clostridia; o__Clostridiales; f__Mogibacteriaceae; g__; s__
New.ReferenceOTU111	-0.611577	0.0265723	0.132419	k__Bacteria; p__Firmicutes; c__Clostridia; o__Clostridiales; f__; g__; s__
New.CleanUp.ReferenceOTU25947	-0.611577	0.0265723	0.132419	k__Bacteria; p__Firmicutes; c__Clostridia; o__Clostridiales; f__; g__; s__
New.CleanUp.ReferenceOTU39397	-0.611577	0.0265723	0.132419	k__Bacteria; p__Firmicutes; c__Clostridia; o__Clostridiales; f__Ruminococcaceae; g__; s__
New.CleanUp.ReferenceOTU70514	-0.611577	0.0265723	0.132419	k__Bacteria; p__Firmicutes; c__Clostridia; o__Clostridiales; f__Ruminococcaceae; g__; s__
New.CleanUp.ReferenceOTU76810	-0.611577	0.0289507	0.13535	k__Bacteria; p__Firmicutes; c__Clostridia; o__Clostridiales; f__Lachnospiraceae; g__; s__
195691	-0.611395	0.0248967	0.132419	k__Bacteria; p__Firmicutes; c__Clostridia; o__Clostridiales; f__Lachnospiraceae; g__; s__
New.ReferenceOTU198	-0.611395	0.0248967	0.132419	k__Bacteria; p__Firmicutes; c__Clostridia; o__Clostridiales; f__Ruminococcaceae; g__Oscillospira; s__
New.CleanUp.ReferenceOTU41686	-0.611395	0.0248967	0.132419	k__Bacteria; p__Firmicutes; c__Clostridia; o__Clostridiales; f__; g__; s__
New.CleanUp.ReferenceOTU47638	-0.611395	0.0248967	0.132419	k__Bacteria; p__Firmicutes; c__Clostridia; o__Clostridiales; f__; g__; s__
New.CleanUp.ReferenceOTU69022	-0.611395	0.0248967	0.132419	k__Bacteria; p__Firmicutes; c__Clostridia; o__Clostridiales; f__Ruminococcaceae; g__; s__
New.ReferenceOTU210	-0.597741	0.0236368	0.132419	k__Bacteria; p__Firmicutes; c__Clostridia; o__Clostridiales; f__Ruminococcaceae; g__Oscillospira; s__
New.CleanUp.ReferenceOTU5952	-0.597741	0.0236368	0.132419	k__Bacteria; p__Firmicutes; c__Clostridia; o__Clostridiales; f__; g__; s__
New.CleanUp.ReferenceOTU8745	-0.597741	0.0236368	0.132419	k__Bacteria; p__Firmicutes; c__Clostridia; o__Clostridiales; f__Ruminococcaceae
New.CleanUp.ReferenceOTU68429	-0.597741	0.0236368	0.132419	k__Bacteria; p__Firmicutes; c__Clostridia; o__Clostridiales; f__; g__; s__
293580	-0.595914	0.027438	0.133446	k__Bacteria; p__Firmicutes; c__Clostridia; o__Clostridiales; f__Lachnospiraceae; g__; s__
New.CleanUp.ReferenceOTU45518	-0.595914	0.027438	0.133446	k__Bacteria; p__Firmicutes; c__Clostridia; o__Clostridiales; f__Ruminococcaceae; g__; s__
New.CleanUp.ReferenceOTU69072	-0.595914	0.027438	0.133446	k__Bacteria; p__Firmicutes; c__Clostridia; o__Clostridiales; f__Ruminococcaceae; g__; s__
New.CleanUp.ReferenceOTU57405	-0.595683	0.0385072	0.140653	k__Bacteria; p__Firmicutes; c__Clostridia; o__Clostridiales; f__; g__; s__
New.CleanUp.ReferenceOTU15665	-0.594818	0.0308671	0.137315	k__Bacteria; p__Bacteroidetes; c__Bacteroidia; o__Bacteroidales; f__Porphyromonadaceae; g__Parabacteroides; s__
310653	-0.594651	0.0330868	0.139385	k__Bacteria; p__Firmicutes; c__Clostridia; o__Clostridiales; f__; g__; s__
182176	-0.594651	0.0330868	0.139385	k__Bacteria; p__Verrucomicrobia; c__Verrucomicrobiae; o__Verrucomicrobiales; f__Verrucomicrobiaceae; g__Akkermansia; s__muciniphila
260156	-0.594651	0.0330868	0.139385	k__Bacteria; p__Firmicutes; c__Clostridia; o__Clostridiales; f__; g__; s__
274312	-0.594651	0.0330868	0.139385	k__Bacteria; p__Firmicutes; c__Clostridia; o__Clostridiales; f__; g__; s__
New.CleanUp.ReferenceOTU715	-0.594651	0.0330868	0.139385	k__Bacteria; p__Firmicutes; c__Clostridia; o__Clostridiales; f__Ruminococcaceae; g__; s__
New.CleanUp.ReferenceOTU2204	-0.594651	0.0330868	0.139385	k__Bacteria; p__Firmicutes; c__Bacilli; o__Lactobacillales; f__Lactobacillaceae; g__Lactobacillus; s__
New.CleanUp.ReferenceOTU85156	-0.594651	0.0330868	0.139385	k__Bacteria; p__Firmicutes; c__Clostridia; o__Clostridiales; f__; g__; s__
New.CleanUp.ReferenceOTU65938	-0.587887	0.0444471	0.152419	Unassigned
268720	-0.584307	0.0247639	0.132419	k__Bacteria; p__Firmicutes; c__Clostridia; o__Clostridiales; f__Ruminococcaceae; g__Ruminococcus; s__
259884	-0.584307	0.0247639	0.132419	k__Bacteria; p__Firmicutes; c__Clostridia; o__Clostridiales; f__Ruminococcaceae; g__Oscillospira; s__
269070	-0.584307	0.0247639	0.132419	k__Bacteria; p__Firmicutes; c__Clostridia; o__Clostridiales; f__Ruminococcaceae; g__; s__
179547	-0.584307	0.0247639	0.132419	k__Bacteria; p__Firmicutes; c__Clostridia; o__Clostridiales; f__Ruminococcaceae; g__Oscillospira; s__
173892	-0.584307	0.0247639	0.132419	k__Bacteria; p__Firmicutes; c__Clostridia; o__Clostridiales; f__Lachnospiraceae; g__; s__
196191	-0.584307	0.0247639	0.132419	k__Bacteria; p__Firmicutes; c__Clostridia; o__Clostridiales; f__Ruminococcaceae; g__Oscillospira; s__
189611	-0.581553	0.0291673	0.13535	k__Bacteria; p__Firmicutes; c__Clostridia; o__Clostridiales; f__Lachnospiraceae; g__Coprococcus; s__
174770	-0.581553	0.0287244	0.13535	k__Bacteria; p__Firmicutes; c__Clostridia; o__Clostridiales; f__; g__; s__
328212	-0.581553	0.0287244	0.13535	k__Bacteria; p__Firmicutes; c__Clostridia; o__Clostridiales; f__Ruminococcaceae; g__; s__
191274	-0.581553	0.0287244	0.13535	k__Bacteria; p__Firmicutes; c__Clostridia; o__Clostridiales; f__Lachnospiraceae; g__; s__
New.ReferenceOTU186	-0.581553	0.0287244	0.13535	k__Bacteria; p__Firmicutes; c__Clostridia; o__Clostridiales; f__Ruminococcaceae
New.CleanUp.ReferenceOTU26980	-0.581553	0.0291673	0.13535	Unassigned
New.CleanUp.ReferenceOTU19575	-0.580259	0.0480875	0.156419	k__Bacteria; p__Firmicutes; c__Clostridia; o__Clostridiales; f__Dehalobacteriaceae; g__Dehalobacterium; s__
New.CleanUp.ReferenceOTU82410	-0.580259	0.0480875	0.156419	k__Bacteria; p__Firmicutes; c__Clostridia; o__Clostridiales; f__; g__; s__
179512	-0.579365	0.0338274	0.139385	k__Bacteria; p__Firmicutes; c__Clostridia; o__Clostridiales; f__Clostridiaceae; g__SMB53; s__
260666	-0.579365	0.0323206	0.139385	k__Bacteria; p__Firmicutes; c__Clostridia; o__Clostridiales; f__Lachnospiraceae; g__; s__
New.ReferenceOTU168	-0.577897	0.0375216	0.140653	k__Bacteria; p__Firmicutes; c__Clostridia; o__Clostridiales; f__Ruminococcaceae; g__; s__
New.CleanUp.ReferenceOTU26380	-0.577897	0.0375216	0.140653	k__Bacteria; p__Bacteroidetes; c__Bacteroidia; o__Bacteroidales; f__Porphyromonadaceae; g__Parabacteroides; s__
New.CleanUp.ReferenceOTU78077	-0.577897	0.0375216	0.140653	k__Bacteria; p__Bacteroidetes; c__Bacteroidia; o__Bacteroidales; f__S24-7; g__; s__
266223	-0.57735	0.0409971	0.144507	k__Bacteria; p__Firmicutes; c__Clostridia; o__Clostridiales; f__Ruminococcaceae; g__; s__
New.CleanUp.ReferenceOTU12839	-0.57735	0.0409971	0.144507	k__Bacteria; p__Firmicutes; c__Clostridia; o__Clostridiales; f__Lachnospiraceae; g__Ruminococcus; s__gnavus
New.CleanUp.ReferenceOTU18716	-0.572872	0.0593271	0.170987	k__Bacteria; p__Bacteroidetes; c__Bacteroidia; o__Bacteroidales; f__Porphyromonadaceae; g__Parabacteroides; s__
197099	-0.568182	0.0304788	0.137035	k__Bacteria; p__Firmicutes; c__Clostridia; o__Clostridiales; f__Ruminococcaceae; g__Oscillospira; s__
2897332	-0.568182	0.0304788	0.137035	k__Bacteria; p__Firmicutes; c__Clostridia; o__Clostridiales; f__Lachnospiraceae; g__Ruminococcus; s__gnavus
4343528	-0.568182	0.0304788	0.137035	k__Bacteria; p__Firmicutes; c__Clostridia; o__Clostridiales; f__Ruminococcaceae; g__Oscillospira; s__
349246	-0.568182	0.0304788	0.137035	k__Bacteria; p__Firmicutes; c__Clostridia; o__Clostridiales; f__Ruminococcaceae; g__; s__
250270	-0.568182	0.0304788	0.137035	k__Bacteria; p__Firmicutes; c__Clostridia; o__Clostridiales; f__; g__; s__
313274	-0.568182	0.0304788	0.137035	k__Bacteria; p__Firmicutes; c__Clostridia; o__Clostridiales; f__Ruminococcaceae; g__Oscillospira; s__
176139	-0.565058	0.0353195	0.140653	k__Bacteria; p__Firmicutes; c__Clostridia; o__Clostridiales; f__; g__; s__
New.ReferenceOTU251	-0.565058	0.0353195	0.140653	k__Bacteria; p__Verrucomicrobia; c__Verrucomicrobiae; o__Verrucomicrobiales; f__Verrucomicrobiaceae; g__Akkermansia; s__muciniphila
New.CleanUp.ReferenceOTU16663	-0.562483	0.0397744	0.141678	k__Bacteria; p__Firmicutes; c__Clostridia; o__Clostridiales; f__Lachnospiraceae; g__Ruminococcus; s__gnavus
New.CleanUp.ReferenceOTU21680	-0.562483	0.0397744	0.141678	k__Bacteria; p__Firmicutes; c__Clostridia; o__Clostridiales; f__Ruminococcaceae; g__Oscillospira; s__
New.CleanUp.ReferenceOTU2630	-0.560612	0.0461269	0.154893	k__Bacteria; p__Firmicutes; c__Clostridia; o__Clostridiales; f__Ruminococcaceae; g__Oscillospira; s__
New.CleanUp.ReferenceOTU39572	-0.560612	0.0461269	0.154893	k__Bacteria; p__Firmicutes; c__Clostridia; o__Clostridiales; f__Lachnospiraceae; g__; s__
New.CleanUp.ReferenceOTU13756	-0.559652	0.0498113	0.158959	k__Bacteria; p__Firmicutes; c__Clostridia; o__Clostridiales; f__; g__; s__
New.CleanUp.ReferenceOTU20512	-0.559652	0.0498113	0.158959	k__Bacteria; p__Firmicutes; c__Clostridia; o__Clostridiales; f__Lachnospiraceae; g__; s__
New.CleanUp.ReferenceOTU59192	-0.559652	0.0498113	0.158959	k__Bacteria; p__Firmicutes; c__Clostridia; o__Clostridiales; f__Ruminococcaceae; g__; s__
New.CleanUp.ReferenceOTU83449	-0.559652	0.0498113	0.158959	k__Bacteria; p__Firmicutes; c__Clostridia; o__Clostridiales; f__; g__; s__
191816	-0.551761	0.0373477	0.140653	k__Bacteria; p__Firmicutes; c__Clostridia; o__Clostridiales; f__Ruminococcaceae; g__Oscillospira; s__
188533	-0.551761	0.0373477	0.140653	k__Bacteria; p__Firmicutes; c__Clostridia; o__Clostridiales; f__Ruminococcaceae; g__; s__
196315	-0.551761	0.0373477	0.140653	k__Bacteria; p__Firmicutes; c__Clostridia; o__Clostridiales; f__Clostridiaceae; g__SMB53; s__
266841	-0.548241	0.0432321	0.149264	k__Bacteria; p__Firmicutes; c__Clostridia; o__Clostridiales; f__Ruminococcaceae; g__Oscillospira; s__
261894	-0.548241	0.0432321	0.149264	k__Bacteria; p__Firmicutes; c__Clostridia; o__Clostridiales; f__Ruminococcaceae; g__Oscillospira; s__
197139	-0.548241	0.0432321	0.149264	k__Bacteria; p__Firmicutes; c__Clostridia; o__Clostridiales; f__; g__; s__
New.CleanUp.ReferenceOTU65175	-0.54525	0.0487169	0.157958	k__Bacteria; p__Firmicutes; c__Clostridia; o__Clostridiales; f__Lachnospiraceae; g__Ruminococcus; s__gnavus
265030	-0.54153	0.0611613	0.174065	k__Bacteria; p__Firmicutes; c__Clostridia; o__Clostridiales; f__; g__; s__
136604	-0.53936	0.0388794	0.140653	k__Bacteria; p__Firmicutes; c__Clostridia; o__Clostridiales; f__Lachnospiraceae; g__; s__
267689	-0.53936	0.0388794	0.140653	k__Bacteria; p__Firmicutes; c__Clostridia; o__Clostridiales; f__Ruminococcaceae; g__; s__
4440624	-0.53936	0.0388794	0.140653	k__Bacteria; p__Firmicutes; c__Clostridia; o__Clostridiales; f__Lachnospiraceae; g__; s__
4410988	-0.53936	0.0388794	0.140653	k__Bacteria; p__Firmicutes; c__Clostridia; o__Clostridiales; f__Ruminococcaceae; g__Oscillospira; s__
214835	-0.53936	0.0388794	0.140653	k__Bacteria; p__Firmicutes; c__Clostridia; o__Clostridiales; f__Lachnospiraceae; g__; s__
266343	-0.53936	0.0388794	0.140653	k__Bacteria; p__Firmicutes; c__Clostridia; o__Clostridiales; f__; g__; s__
263546	-0.53936	0.0388794	0.140653	k__Bacteria; p__Firmicutes; c__Clostridia; o__Clostridiales; f__Ruminococcaceae; g__Oscillospira; s__
New.ReferenceOTU192	-0.53936	0.0388794	0.140653	k__Bacteria; p__Firmicutes; c__Clostridia; o__Clostridiales; f__; g__; s__
New.CleanUp.ReferenceOTU8058	-0.53936	0.0388794	0.140653	k__Bacteria; p__Firmicutes; c__Clostridia; o__Clostridiales; f__Ruminococcaceae; g__; s__
New.CleanUp.ReferenceOTU15666	-0.531898	0.070472	0.185578	k__Bacteria; p__Bacteroidetes; c__Bacteroidia; o__Bacteroidales; f__Porphyromonadaceae; g__Parabacteroides; s__
New.CleanUp.ReferenceOTU27747	-0.531085	0.0506659	0.160171	k__Bacteria; p__Firmicutes; c__Clostridia; o__Clostridiales; f__; g__; s__
New.CleanUp.ReferenceOTU4541	-0.527645	0.0586312	0.170987	k__Bacteria; p__Firmicutes; c__Clostridia; o__Clostridiales; f__; g__; s__
New.CleanUp.ReferenceOTU48452	-0.527645	0.0586312	0.170987	k__Bacteria; p__Firmicutes; c__Clostridia; o__Clostridiales; f__Lachnospiraceae; g__; s__
New.CleanUp.ReferenceOTU71364	-0.527645	0.0586312	0.170987	k__Bacteria; p__Firmicutes; c__Clostridia; o__Clostridiales; f__; g__; s__
New.CleanUp.ReferenceOTU54811	-0.524864	0.0678468	0.184872	k__Bacteria; p__Firmicutes; c__Clostridia; o__Clostridiales; f__Ruminococcaceae; g__; s__
New.CleanUp.ReferenceOTU56331	-0.524864	0.0644672	0.179166	k__Bacteria; p__Firmicutes; c__Clostridia; o__Clostridiales; f__; g__; s__
New.CleanUp.ReferenceOTU58469	-0.524864	0.0678468	0.184872	Unassigned
New.CleanUp.ReferenceOTU66218	-0.524864	0.0644672	0.179166	k__Bacteria; p__Firmicutes; c__Clostridia; o__Clostridiales; f__; g__; s__
New.CleanUp.ReferenceOTU75474	-0.524864	0.0644672	0.179166	k__Bacteria; p__Firmicutes; c__Clostridia; o__Clostridiales; f__Lachnospiraceae; g__Coprococcus; s__
197463	-0.522727	0.0473123	0.154893	k__Bacteria; p__Firmicutes; c__Clostridia; o__Clostridiales; f__Ruminococcaceae; g__Oscillospira; s__
1107303	-0.522727	0.0473123	0.154893	k__Bacteria; p__Firmicutes; c__Clostridia; o__Clostridiales; f__; g__; s__
264586	-0.522727	0.0473123	0.154893	k__Bacteria; p__Firmicutes; c__Clostridia; o__Clostridiales; f__; g__; s__
267124	-0.522727	0.0473123	0.154893	k__Bacteria; p__Firmicutes; c__Clostridia; o__Clostridiales; f__; g__; s__
268844	-0.522727	0.0473123	0.154893	k__Bacteria; p__Firmicutes; c__Clostridia; o__Clostridiales; f__; g__; s__
New.ReferenceOTU127	-0.522727	0.0473123	0.154893	k__Bacteria; p__Firmicutes; c__Clostridia; o__Clostridiales; f__; g__; s__
New.ReferenceOTU37	-0.522727	0.0473123	0.154893	k__Bacteria; p__Firmicutes; c__Clostridia; o__Clostridiales; f__; g__; s__
New.CleanUp.ReferenceOTU34850	-0.522727	0.0473123	0.154893	k__Bacteria; p__Firmicutes; c__Clostridia; o__Clostridiales; f__Ruminococcaceae; g__; s__
328905	-0.51797	0.0546485	0.167526	k__Bacteria; p__Firmicutes; c__Clostridia; o__Clostridiales; f__Ruminococcaceae; g__Oscillospira; s__
New.CleanUp.ReferenceOTU30956	-0.514454	0.0760989	0.195739	k__Bacteria; p__Firmicutes; c__Clostridia; o__Clostridiales; f__; g__; s__
182837	-0.513572	0.0631154	0.176866	k__Bacteria; p__Firmicutes; c__Clostridia; o__Clostridiales; f__Ruminococcaceae; g__; s__
New.ReferenceOTU97	-0.513572	0.0615995	0.174065	k__Bacteria; p__Firmicutes; c__Clostridia; o__Clostridiales; f__Ruminococcaceae; g__; s__
New.ReferenceOTU249	-0.513572	0.0615995	0.174065	k__Bacteria; p__Firmicutes; c__Clostridia; o__Clostridiales; f__Dehalobacteriaceae; g__Dehalobacterium; s__
New.CleanUp.ReferenceOTU25944	-0.513572	0.0615995	0.174065	k__Bacteria; p__Firmicutes; c__Clostridia; o__Clostridiales; f__Ruminococcaceae; g__Oscillospira; s__
New.CleanUp.ReferenceOTU5958	-0.509647	0.0711837	0.185578	k__Bacteria; p__Verrucomicrobia; c__Verrucomicrobiae; o__Verrucomicrobiales; f__Verrucomicrobiaceae; g__Akkermansia; s__muciniphila
New.CleanUp.ReferenceOTU47177	-0.509647	0.0711837	0.185578	k__Bacteria; p__Verrucomicrobia; c__Verrucomicrobiae; o__Verrucomicrobiales; f__Verrucomicrobiaceae; g__Akkermansia; s__muciniphila
New.CleanUp.ReferenceOTU16721	-0.506352	0.0774928	0.196968	k__Bacteria; p__Firmicutes; c__Clostridia; o__Clostridiales; f__Ruminococcaceae; g__Oscillospira; s__
New.CleanUp.ReferenceOTU57360	-0.505781	0.0573145	0.170987	k__Bacteria; p__Firmicutes; c__Clostridia; o__Clostridiales; f__Ruminococcaceae; g__Oscillospira; s__
New.CleanUp.ReferenceOTU10735	-0.503903	0.0875672	0.20598	k__Bacteria; p__Firmicutes; c__Clostridia; o__Clostridiales; f__Lachnospiraceae; g__; s__
New.CleanUp.ReferenceOTU12979	-0.503903	0.0875672	0.20598	k__Bacteria; p__Firmicutes; c__Clostridia; o__Clostridiales; f__; g__; s__
New.CleanUp.ReferenceOTU41561	-0.503903	0.0875672	0.20598	k__Bacteria; p__Firmicutes; c__Clostridia; o__Clostridiales; f__Ruminococcaceae; g__Oscillospira; s__
New.CleanUp.ReferenceOTU55971	-0.503903	0.0875672	0.20598	k__Bacteria; p__Firmicutes; c__Clostridia; o__Clostridiales; f__; g__; s__
177068	-0.494413	0.0593144	0.170987	k__Bacteria; p__Firmicutes; c__Clostridia; o__Clostridiales; f__; g__; s__
328391	-0.494413	0.0593144	0.170987	k__Bacteria; p__Firmicutes; c__Clostridia; o__Clostridiales; f__Ruminococcaceae; g__; s__
198888	-0.494413	0.0593144	0.170987	k__Bacteria; p__Firmicutes; c__Clostridia; o__Clostridiales; f__Ruminococcaceae; g__; s__
197706	-0.494413	0.0593144	0.170987	k__Bacteria; p__Firmicutes; c__Clostridia; o__Clostridiales; f__; g__; s__
1108378	-0.494413	0.0593144	0.170987	k__Bacteria; p__Firmicutes; c__Clostridia; o__Clostridiales; f__; g__; s__
261132	-0.494413	0.0593144	0.170987	k__Bacteria; p__Firmicutes; c__Clostridia; o__Clostridiales; f__Ruminococcaceae; g__; s__
259556	-0.494413	0.0593144	0.170987	k__Bacteria; p__Firmicutes; c__Clostridia; o__Clostridiales; f__; g__; s__
New.ReferenceOTU252	-0.494413	0.0593144	0.170987	k__Bacteria; p__Bacteroidetes; c__Bacteroidia; o__Bacteroidales; f__Porphyromonadaceae; g__Parabacteroides; s__
New.ReferenceOTU45	-0.494413	0.0593144	0.170987	k__Bacteria; p__Firmicutes; c__Clostridia; o__Clostridiales; f__; g__; s__
New.ReferenceOTU47	-0.494413	0.0593144	0.170987	k__Bacteria; p__Firmicutes; c__Clostridia; o__Clostridiales; f__Ruminococcaceae; g__Oscillospira; s__
198998	-0.491233	0.0812343	0.203411	k__Bacteria; p__Firmicutes; c__Clostridia; o__Clostridiales; f__; g__; s__
164242	-0.491233	0.0812343	0.203411	k__Bacteria; p__Firmicutes; c__Clostridia; o__Clostridiales; f__Ruminococcaceae; g__; s__
New.CleanUp.ReferenceOTU31169	-0.491233	0.0812343	0.203411	k__Bacteria; p__Firmicutes; c__Clostridia; o__Clostridiales; f__Ruminococcaceae; g__; s__
New.CleanUp.ReferenceOTU32794	-0.491233	0.0812343	0.203411	k__Bacteria; p__Firmicutes; c__Clostridia; o__Clostridiales; f__; g__; s__
261467	-0.488504	0.0683478	0.184872	k__Bacteria; p__Firmicutes; c__Clostridia; o__Clostridiales; f__; g__; s__
190676	-0.488504	0.0683478	0.184872	k__Bacteria; p__Firmicutes; c__Clostridia; o__Clostridiales; f__Ruminococcaceae; g__Oscillospira; s__
New.ReferenceOTU66	-0.488504	0.0691129	0.184963	k__Bacteria; p__Firmicutes; c__Clostridia; o__Clostridiales; f__; g__; s__
New.ReferenceOTU49	-0.488504	0.0691129	0.184963	k__Bacteria; p__Firmicutes; c__Clostridia; o__Clostridiales; f__Ruminococcaceae; g__Oscillospira; s__
New.CleanUp.ReferenceOTU5150	-0.488504	0.0691129	0.184963	k__Bacteria; p__Firmicutes; c__Clostridia; o__Clostridiales; f__Ruminococcaceae; g__Oscillospira; s__
New.CleanUp.ReferenceOTU29131	-0.488504	0.0691129	0.184963	k__Bacteria; p__Bacteroidetes; c__Bacteroidia; o__Bacteroidales; f__Porphyromonadaceae; g__Parabacteroides; s__
New.CleanUp.ReferenceOTU47152	-0.487377	0.093887	0.212255	k__Bacteria; p__Firmicutes; c__Clostridia; o__Clostridiales; f__; g__; s__
356148	-0.482805	0.0770316	0.196784	k__Bacteria; p__Firmicutes; c__Clostridia; o__Clostridiales; f__Lachnospiraceae; g__; s__
275974	-0.479702	0.0986299	0.219071	k__Bacteria; p__Actinobacteria; c__Coriobacteriia; o__Coriobacteriales; f__Coriobacteriaceae; g__Adlercreutzia; s__
191108	-0.477393	0.0887829	0.206946	k__Bacteria; p__Firmicutes; c__Clostridia; o__Clostridiales; f__; g__; s__
New.CleanUp.ReferenceOTU3759	-0.477393	0.0887829	0.206946	k__Bacteria; p__Firmicutes; c__Clostridia; o__Clostridiales; f__; g__; s__
New.CleanUp.ReferenceOTU72555	-0.477393	0.0897336	0.208681	k__Bacteria; p__Firmicutes; c__Clostridia; o__Clostridiales; f__Ruminococcaceae; g__Oscillospira; s__
194662	-0.477273	0.0713605	0.185578	k__Bacteria; p__Firmicutes; c__Clostridia; o__Clostridiales; f__; g__; s__
182033	-0.477273	0.0713605	0.185578	k__Bacteria; p__Firmicutes; c__Clostridia; o__Clostridiales; f__Ruminococcaceae; g__Oscillospira; s__
New.ReferenceOTU79	-0.477273	0.0713605	0.185578	k__Bacteria; p__Firmicutes; c__Clostridia; o__Clostridiales; f__; g__; s__
New.CleanUp.ReferenceOTU18009	-0.475909	0.107861	0.225444	k__Bacteria; p__Firmicutes; c__Clostridia; o__Clostridiales; f__Clostridiaceae; g__; s__
New.CleanUp.ReferenceOTU78683	-0.475909	0.107861	0.225444	k__Bacteria; p__Firmicutes; c__Bacilli; o__Lactobacillales; f__Lactobacillaceae; g__Lactobacillus; s__
New.CleanUp.ReferenceOTU19502	-0.472377	0.100184	0.219071	k__Bacteria; p__Firmicutes; c__Clostridia; o__Clostridiales; f__Ruminococcaceae; g__Oscillospira; s__
New.CleanUp.ReferenceOTU31990	-0.472377	0.100184	0.219071	k__Bacteria; p__Firmicutes; c__Bacilli; o__Lactobacillales; f__Lactobacillaceae; g__Lactobacillus; s__
New.CleanUp.ReferenceOTU42595	-0.472377	0.100184	0.219071	k__Bacteria; p__Firmicutes; c__Clostridia; o__Clostridiales; f__Ruminococcaceae; g__; s__
New.CleanUp.ReferenceOTU63710	-0.472377	0.0980645	0.219071	k__Bacteria; p__Firmicutes; c__Clostridia; o__Clostridiales; f__Ruminococcaceae; g__Oscillospira; s__
New.CleanUp.ReferenceOTU41684	-0.470882	0.0829513	0.204671	k__Bacteria; p__Bacteroidetes; c__Bacteroidia; o__Bacteroidales; f__Porphyromonadaceae; g__Parabacteroides; s__
New.CleanUp.ReferenceOTU59575	-0.470882	0.0820972	0.204057	k__Bacteria; p__Firmicutes; c__Clostridia; o__Clostridiales; f__Ruminococcaceae; g__Ruminococcus; s__
191558	-0.46466	0.0944178	0.212255	k__Bacteria; p__Firmicutes; c__Clostridia; o__Clostridiales; f__Ruminococcaceae; g__Oscillospira; s__
258423	-0.46466	0.0925202	0.212234	k__Bacteria; p__Firmicutes; c__Clostridia; o__Clostridiales; f__; g__; s__
New.CleanUp.ReferenceOTU325	-0.46466	0.0925202	0.212234	k__Bacteria; p__Firmicutes; c__Clostridia; o__Clostridiales; f__; g__; s__
New.CleanUp.ReferenceOTU6015	-0.46466	0.0925202	0.212234	k__Bacteria; p__Firmicutes; c__Clostridia; o__Clostridiales; f__; g__; s__
New.CleanUp.ReferenceOTU7729	-0.46466	0.0944178	0.212255	k__Bacteria; p__Verrucomicrobia; c__Verrucomicrobiae; o__Verrucomicrobiales; f__Verrucomicrobiaceae; g__Akkermansia; s__muciniphila
New.CleanUp.ReferenceOTU14357	-0.46466	0.0925202	0.212234	k__Bacteria; p__Firmicutes; c__Clostridia; o__Clostridiales; f__Lachnospiraceae; g__; s__
New.CleanUp.ReferenceOTU18320	-0.46466	0.0925202	0.212234	k__Bacteria; p__Firmicutes; c__Clostridia; o__Clostridiales; f__; g__; s__
New.CleanUp.ReferenceOTU25395	-0.46466	0.0944178	0.212255	k__Bacteria; p__Firmicutes; c__Bacilli; o__Lactobacillales; f__Lactobacillaceae; g__Lactobacillus; s__
New.CleanUp.ReferenceOTU30139	-0.46466	0.0944178	0.212255	k__Bacteria; p__Firmicutes; c__Clostridia; o__Clostridiales; f__Ruminococcaceae; g__; s__
New.CleanUp.ReferenceOTU58510	-0.46466	0.0944178	0.212255	k__Bacteria; p__Firmicutes; c__Clostridia; o__Clostridiales; f__; g__; s__
659831	-0.4598	0.0854568	0.20598	k__Bacteria; p__Firmicutes; c__Clostridia; o__Clostridiales; f__; g__; s__
414089	-0.4598	0.0854568	0.20598	k__Bacteria; p__Firmicutes; c__Clostridia; o__Clostridiales; f__Ruminococcaceae; g__; s__
183362	-0.4598	0.0854568	0.20598	k__Bacteria; p__Firmicutes; c__Clostridia; o__Clostridiales; f__Lachnospiraceae; g__; s__
263957	-0.4598	0.0854568	0.20598	k__Bacteria; p__Firmicutes; c__Clostridia; o__Clostridiales; f__Clostridiaceae; g__; s__
New.CleanUp.ReferenceOTU12183	-0.4598	0.0854568	0.20598	k__Bacteria; p__Firmicutes; c__Bacilli; o__Lactobacillales; f__Lactobacillaceae; g__Lactobacillus; s__
New.CleanUp.ReferenceOTU73975	-0.4598	0.0854568	0.20598	k__Bacteria; p__Firmicutes; c__Clostridia; o__Clostridiales; f__Ruminococcaceae; g__Oscillospira; s__
New.CleanUp.ReferenceOTU20114	-0.458682	0.106446	0.225444	k__Bacteria; p__Firmicutes; c__Clostridia; o__Clostridiales; f__Lachnospiraceae; g__; s__
263203	-0.453052	0.116586	0.236829	k__Bacteria; p__Firmicutes; c__Clostridia; o__Clostridiales; f__Ruminococcaceae; g__Oscillospira; s__
191445	-0.449467	0.0879615	0.20598	k__Bacteria; p__Firmicutes; c__Clostridia; o__Clostridiales; f__Ruminococcaceae; g__Oscillospira; s__
170950	-0.449467	0.0879615	0.20598	k__Bacteria; p__Firmicutes; c__Clostridia; o__Clostridiales; f__Ruminococcaceae; g__Ruminococcus; s__
261365	-0.449467	0.0879615	0.20598	k__Bacteria; p__Firmicutes; c__Clostridia; o__Clostridiales; f__Ruminococcaceae; g__Ruminococcus; s__
190242	-0.449467	0.0879615	0.20598	k__Bacteria; p__Firmicutes; c__Clostridia; o__Clostridiales; f__Ruminococcaceae; g__Ruminococcus; s__
266411	-0.449467	0.0879615	0.20598	k__Bacteria; p__Firmicutes; c__Clostridia; o__Clostridiales; f__; g__; s__
176957	-0.449467	0.0879615	0.20598	k__Bacteria; p__Firmicutes; c__Clostridia; o__Clostridiales; f__; g__; s__
New.ReferenceOTU259	-0.449467	0.0879615	0.20598	k__Bacteria; p__Bacteroidetes; c__Bacteroidia; o__Bacteroidales; f__Porphyromonadaceae; g__Parabacteroides; s__
New.CleanUp.ReferenceOTU78254	-0.449467	0.0879615	0.20598	k__Bacteria; p__Firmicutes; c__Clostridia; o__Clostridiales; f__; g__; s__
730939	-0.447914	0.131711	0.24905	k__Bacteria; p__Firmicutes; c__Clostridia; o__Clostridiales; f__; g__; s__
New.CleanUp.ReferenceOTU63773	-0.447914	0.131711	0.24905	Unassigned
New.CleanUp.ReferenceOTU49793	-0.447338	0.100474	0.219071	k__Bacteria; p__Firmicutes; c__Clostridia; o__Clostridiales; f__Ruminococcaceae; g__; s__
New.CleanUp.ReferenceOTU17388	-0.446134	0.124121	0.241933	Unassigned
New.CleanUp.ReferenceOTU3755	-0.446113	0.112664	0.233181	k__Bacteria; p__Firmicutes; c__Clostridia; o__Clostridiales; f__Clostridiaceae
New.ReferenceOTU243	-0.44198	0.100915	0.219071	k__Bacteria; p__Verrucomicrobia; c__Verrucomicrobiae; o__Verrucomicrobiales; f__Verrucomicrobiaceae; g__Akkermansia; s__muciniphila
New.CleanUp.ReferenceOTU73348	-0.44198	0.100915	0.219071	k__Bacteria; p__Firmicutes; c__Clostridia; o__Clostridiales; f__Ruminococcaceae; g__; s__
270396	-0.439525	0.12118	0.238963	k__Bacteria; p__Firmicutes; c__Clostridia; o__Clostridiales; f__; g__; s__
New.CleanUp.ReferenceOTU19283	-0.439525	0.12118	0.238963	k__Bacteria; p__Firmicutes; c__Clostridia; o__Clostridiales; f__Ruminococcaceae; g__; s__
New.CleanUp.ReferenceOTU60444	-0.439525	0.12118	0.238963	k__Bacteria; p__Firmicutes; c__Clostridia; o__Clostridiales; f__; g__; s__
275288	-0.434524	0.11572	0.235542	k__Bacteria; p__Firmicutes; c__Clostridia; o__Clostridiales; f__Ruminococcaceae; g__Oscillospira; s__
292962	-0.434524	0.113638	0.233181	k__Bacteria; p__Firmicutes; c__Clostridia; o__Clostridiales; f__Ruminococcaceae; g__Oscillospira; s__
4480557	-0.434524	0.113638	0.233181	k__Bacteria; p__Firmicutes; c__Clostridia; o__Clostridiales; f__Lachnospiraceae; g__; s__
New.ReferenceOTU124	-0.434524	0.113638	0.233181	k__Bacteria; p__Firmicutes; c__Clostridia; o__Clostridiales; f__; g__; s__
New.CleanUp.ReferenceOTU26558	-0.434524	0.11572	0.235542	k__Bacteria; p__Firmicutes; c__Clostridia; o__Clostridiales; f__Ruminococcaceae; g__Oscillospira; s__
New.CleanUp.ReferenceOTU45572	-0.434524	0.113638	0.233181	k__Bacteria; p__Firmicutes; c__Clostridia; o__Clostridiales; f__Ruminococcaceae; g__Oscillospira; s__
New.CleanUp.ReferenceOTU9120	-0.433224	0.139367	0.25869	k__Bacteria; p__Firmicutes; c__Clostridia; o__Clostridiales; f__Ruminococcaceae; g__; s__
New.CleanUp.ReferenceOTU56701	-0.433224	0.139367	0.25869	k__Bacteria; p__Firmicutes; c__Clostridia; o__Clostridiales; f__Ruminococcaceae; g__; s__
New.CleanUp.ReferenceOTU63160	-0.433224	0.139367	0.25869	k__Bacteria; p__Firmicutes; c__Clostridia; o__Clostridiales; f__; g__; s__
340650	-0.431818	0.10462	0.222343	k__Bacteria; p__Firmicutes; c__Clostridia; o__Clostridiales; f__; g__; s__
264225	-0.431818	0.10462	0.222343	k__Bacteria; p__Firmicutes; c__Clostridia; o__Clostridiales; f__; g__; s__
3868285	-0.431818	0.10462	0.222343	k__Bacteria; p__Firmicutes; c__Clostridia; o__Clostridiales; f__; g__; s__
174320	-0.431818	0.10462	0.222343	k__Bacteria; p__Firmicutes; c__Clostridia; o__Clostridiales; f__; g__; s__
New.CleanUp.ReferenceOTU52045	-0.431818	0.10462	0.222343	k__Bacteria; p__Firmicutes; c__Clostridia; o__Clostridiales; f__; g__; s__
259820	-0.427141	0.130341	0.247849	k__Bacteria; p__Firmicutes; c__Clostridia; o__Clostridiales; f__; g__; s__
New.CleanUp.ReferenceOTU4326	-0.427141	0.130341	0.247849	k__Bacteria; p__Firmicutes; c__Clostridia; o__Clostridiales; f__Ruminococcaceae; g__; s__
New.CleanUp.ReferenceOTU29366	-0.427141	0.130341	0.247849	k__Bacteria; p__Firmicutes; c__Clostridia; o__Clostridiales; f__Ruminococcaceae; g__; s__
New.CleanUp.ReferenceOTU40071	-0.427141	0.130341	0.247849	k__Bacteria; p__Firmicutes; c__Clostridia; o__Clostridiales; f__Ruminococcaceae; g__Oscillospira; s__
270200	-0.426401	0.141241	0.259827	k__Bacteria; p__Firmicutes; c__Clostridia; o__Clostridiales; f__Clostridiaceae; g__; s__
335401	-0.423793	0.119796	0.238559	k__Bacteria; p__Firmicutes; c__Clostridia; o__Clostridiales; f__; g__; s__
319702	-0.423793	0.120828	0.238963	k__Bacteria; p__Firmicutes; c__Clostridia; o__Clostridiales; f__Lachnospiraceae; g__; s__
192930	-0.423793	0.119796	0.238559	k__Bacteria; p__Firmicutes; c__Clostridia; o__Clostridiales; f__Ruminococcaceae; g__Oscillospira; s__
335057	-0.423793	0.119796	0.238559	k__Bacteria; p__Firmicutes; c__Clostridia; o__Clostridiales; f__; g__; s__
New.ReferenceOTU44	-0.423793	0.119796	0.238559	k__Bacteria; p__Firmicutes; c__Clostridia; o__Clostridiales; f__Lachnospiraceae; g__; s__
New.CleanUp.ReferenceOTU13139	-0.423793	0.119796	0.238559	k__Bacteria; p__Firmicutes; c__Clostridia; o__Clostridiales; f__Ruminococcaceae; g__Oscillospira; s__
New.CleanUp.ReferenceOTU15814	-0.423793	0.119796	0.238559	k__Bacteria; p__Firmicutes; c__Clostridia; o__Clostridiales; f__Ruminococcaceae; g__Ruminococcus; s__
New.CleanUp.ReferenceOTU74009	-0.423793	0.119796	0.238559	Unassigned
New.CleanUp.ReferenceOTU81144	-0.423793	0.119796	0.238559	k__Bacteria; p__Firmicutes; c__Clostridia; o__Clostridiales; f__Ruminococcaceae; g__Oscillospira; s__
New.CleanUp.ReferenceOTU69066	-0.421329	0.133159	0.251317	k__Bacteria; p__Bacteroidetes; c__Bacteroidia; o__Bacteroidales; f__Porphyromonadaceae; g__Parabacteroides; s__
199307	-0.419891	0.144377	0.261057	k__Bacteria; p__Firmicutes; c__Clostridia; o__Clostridiales; f__Ruminococcaceae; g__; s__
272593	-0.419891	0.149416	0.261057	k__Bacteria; p__Firmicutes; c__Clostridia; o__Clostridiales; f__Lachnospiraceae; g__Ruminococcus; s__gnavus
4430498	-0.419891	0.146903	0.261057	k__Bacteria; p__Firmicutes; c__Clostridia; o__Clostridiales; f__Ruminococcaceae; g__Oscillospira; s__
New.CleanUp.ReferenceOTU2444	-0.419891	0.146903	0.261057	k__Bacteria; p__Firmicutes; c__Clostridia; o__Clostridiales; f__; g__; s__
New.CleanUp.ReferenceOTU19049	-0.419891	0.146903	0.261057	k__Bacteria; p__Firmicutes; c__Clostridia; o__Clostridiales; f__Ruminococcaceae
New.CleanUp.ReferenceOTU24324	-0.419891	0.149416	0.261057	k__Bacteria; p__Firmicutes; c__Clostridia; o__Clostridiales; f__; g__; s__
268297	-0.415749	0.134827	0.25305	k__Bacteria; p__Firmicutes; c__Clostridia; o__Clostridiales; f__Lachnospiraceae; g__Ruminococcus; s__gnavus
356055	-0.415749	0.134827	0.25305	k__Bacteria; p__Firmicutes; c__Clostridia; o__Clostridiales; f__Ruminococcaceae; g__Oscillospira; s__
New.CleanUp.ReferenceOTU7846	-0.415749	0.137093	0.255879	k__Bacteria; p__Verrucomicrobia; c__Verrucomicrobiae; o__Verrucomicrobiales; f__Verrucomicrobiaceae; g__Akkermansia; s__muciniphila
New.CleanUp.ReferenceOTU28873	-0.415749	0.134827	0.25305	k__Bacteria; p__Firmicutes; c__Clostridia; o__Clostridiales; f__Lachnospiraceae; g__; s__
263144	-0.41382	0.123846	0.241864	k__Bacteria; p__Firmicutes; c__Clostridia; o__Clostridiales; f__; g__; s__
178738	-0.41367	0.146231	0.261057	k__Bacteria; p__Firmicutes; c__Clostridia; o__Clostridiales; f__Clostridiaceae; g__; s__
180235	-0.407718	0.148078	0.261057	k__Bacteria; p__Firmicutes; c__Clostridia; o__Clostridiales; f__Ruminococcaceae; g__Oscillospira; s__
260001	-0.407718	0.154316	0.268229	k__Bacteria; p__Firmicutes; c__Clostridia; o__Clostridiales; f__; g__; s__
New.CleanUp.ReferenceOTU48077	-0.407718	0.154316	0.268229	k__Bacteria; p__Firmicutes; c__Bacilli; o__Lactobacillales; f__Lactobacillaceae; g__Lactobacillus; s__
259212	-0.406148	0.167707	0.283574	k__Bacteria; p__Firmicutes; c__Clostridia; o__Clostridiales; f__Clostridiaceae; g__; s__
4442899	-0.405222	0.14152	0.259827	k__Bacteria; p__Firmicutes; c__Clostridia; o__Clostridiales; f__; g__; s__
New.CleanUp.ReferenceOTU18387	-0.405222	0.14152	0.259827	k__Bacteria; p__Firmicutes; c__Clostridia; o__Clostridiales; f__; g__; s__
New.CleanUp.ReferenceOTU49680	-0.405222	0.14152	0.259827	k__Bacteria; p__Firmicutes; c__Clostridia; o__Clostridiales; f__; g__; s__
135956	-0.40452	0.126849	0.24396	k__Bacteria; p__Firmicutes; c__Bacilli; o__Lactobacillales; f__Lactobacillaceae; g__Lactobacillus; s__
4345268	-0.40452	0.126849	0.24396	k__Bacteria; p__Firmicutes; c__Clostridia; o__Clostridiales; f__Lachnospiraceae; g__; s__
1108453	-0.40452	0.126849	0.24396	k__Bacteria; p__Firmicutes; c__Clostridia; o__Clostridiales; f__; g__; s__
228140	-0.40452	0.126849	0.24396	k__Bacteria; p__Firmicutes; c__Clostridia; o__Clostridiales; f__Mogibacteriaceae; g__; s__
New.CleanUp.ReferenceOTU55648	-0.402015	0.157361	0.272118	k__Bacteria; p__Firmicutes; c__Clostridia; o__Clostridiales; f__Ruminococcaceae; g__; s__
New.CleanUp.ReferenceOTU22112	-0.399751	0.169719	0.283574	k__Bacteria; p__Firmicutes; c__Clostridia; o__Clostridiales; f__Ruminococcaceae; g__Oscillospira; s__
New.CleanUp.ReferenceOTU22784	-0.399751	0.169719	0.283574	k__Bacteria; p__Firmicutes; c__Clostridia; o__Clostridiales; f__Ruminococcaceae; g__; s__
New.CleanUp.ReferenceOTU77234	-0.399751	0.169719	0.283574	k__Bacteria; p__Firmicutes; c__Clostridia; o__Clostridiales; f__; g__; s__
287507	-0.396545	0.15916	0.273409	k__Bacteria; p__Firmicutes; c__Clostridia; o__Clostridiales; f__Lachnospiraceae; g__; s__
New.CleanUp.ReferenceOTU10939	-0.396545	0.15916	0.273409	k__Bacteria; p__Firmicutes; c__Clostridia; o__Clostridiales; f__Ruminococcaceae; g__Oscillospira; s__
197624	-0.395456	0.144795	0.261057	k__Bacteria; p__Firmicutes; c__Clostridia; o__Clostridiales; f__Ruminococcaceae; g__; s__
771140	-0.395456	0.144795	0.261057	k__Bacteria; p__Firmicutes; c__Clostridia; o__Clostridiales; f__; g__; s__
157772	-0.395456	0.144795	0.261057	k__Bacteria; p__Firmicutes; c__Clostridia; o__Clostridiales; f__Ruminococcaceae; g__Oscillospira; s__
265036	-0.395456	0.145906	0.261057	k__Bacteria; p__Firmicutes; c__Clostridia; o__Clostridiales; f__Ruminococcaceae; g__; s__
New.CleanUp.ReferenceOTU51097	-0.395456	0.145906	0.261057	k__Bacteria; p__Firmicutes; c__Clostridia; o__Clostridiales; f__Peptostreptococcaceae; g__; s__
New.CleanUp.ReferenceOTU61	-0.391965	0.20869	0.317004	k__Bacteria; p__Bacteroidetes; c__Bacteroidia; o__Bacteroidales; f__Porphyromonadaceae; g__Parabacteroides; s__
New.CleanUp.ReferenceOTU74473	-0.391293	0.160952	0.275503	k__Bacteria; p__Firmicutes; c__Clostridia; o__Clostridiales; f__; g__; s__
259870	-0.387816	0.175064	0.28577	k__Bacteria; p__Firmicutes; c__Clostridia; o__Clostridiales; f__; g__; s__
New.CleanUp.ReferenceOTU22950	-0.387816	0.175064	0.28577	k__Bacteria; p__Firmicutes; c__Clostridia; o__Clostridiales; f__Lachnospiraceae; g__; s__
197696	-0.386364	0.14915	0.261057	k__Bacteria; p__Firmicutes; c__Clostridia; o__Clostridiales; f__Ruminococcaceae; g__; s__
170926	-0.386364	0.14915	0.261057	k__Bacteria; p__Firmicutes; c__Clostridia; o__Clostridiales; f__Ruminococcaceae; g__; s__
4356342	-0.386364	0.14915	0.261057	k__Bacteria; p__Firmicutes; c__Clostridia; o__Clostridiales; f__Lachnospiraceae; g__Ruminococcus; s__gnavus
262527	-0.386364	0.14915	0.261057	k__Bacteria; p__Firmicutes; c__Clostridia; o__Clostridiales; f__; g__; s__
New.ReferenceOTU81	-0.386364	0.14915	0.261057	k__Bacteria; p__Firmicutes; c__Clostridia; o__Clostridiales; f__Ruminococcaceae; g__; s__
268962	-0.386244	0.166361	0.281899	k__Bacteria; p__Firmicutes; c__Clostridia; o__Clostridiales; f__Ruminococcaceae; g__; s__
349372	-0.386244	0.162736	0.276684	k__Bacteria; p__Firmicutes; c__Clostridia; o__Clostridiales; f__; g__; s__
New.CleanUp.ReferenceOTU4111	-0.386244	0.162736	0.276684	k__Bacteria; p__Firmicutes; c__Clostridia; o__Clostridiales; f__Ruminococcaceae; g__Oscillospira; s__
New.CleanUp.ReferenceOTU55163	-0.386244	0.162736	0.276684	k__Bacteria; p__Firmicutes; c__Clostridia; o__Clostridiales; f__; g__; s__
New.CleanUp.ReferenceOTU31191	-0.379071	0.20017	0.313948	k__Bacteria; p__Firmicutes; c__Clostridia; o__Clostridiales; f__Lachnospiraceae; g__; s__
New.CleanUp.ReferenceOTU54188	-0.379071	0.20017	0.313948	k__Bacteria; p__Firmicutes; c__Clostridia; o__Clostridiales; f__Peptostreptococcaceae; g__; s__
New.CleanUp.ReferenceOTU12617	-0.376889	0.185615	0.297107	k__Bacteria; p__Firmicutes; c__Clostridia; o__Clostridiales; f__; g__; s__
New.CleanUp.ReferenceOTU32081	-0.376889	0.185615	0.297107	k__Bacteria; p__Firmicutes; c__Clostridia; o__Clostridiales; f__Ruminococcaceae; g__; s__
New.CleanUp.ReferenceOTU60500	-0.376889	0.188226	0.30081	k__Bacteria; p__Firmicutes; c__Clostridia; o__Clostridiales; f__Ruminococcaceae; g__Ruminococcus; s__
New.ReferenceOTU62	-0.376705	0.169872	0.283574	k__Bacteria; p__Firmicutes; c__Clostridia; o__Clostridiales; f__; g__; s__
New.ReferenceOTU103	-0.376705	0.169872	0.283574	k__Bacteria; p__Firmicutes; c__Clostridia; o__Clostridiales; f__Lachnospiraceae; g__; s__
New.CleanUp.ReferenceOTU64581	-0.376705	0.171062	0.284621	k__Bacteria; p__Firmicutes; c__Clostridia; o__Clostridiales; f__; g__; s__
New.CleanUp.ReferenceOTU78609	-0.376705	0.171062	0.284621	k__Bacteria; p__Firmicutes; c__Clostridia; o__Clostridiales; f__; g__; s__
258232	-0.36784	0.174531	0.28577	k__Bacteria; p__Firmicutes; c__Clostridia; o__Clostridiales; f__; g__; s__
266091	-0.36784	0.174531	0.28577	k__Bacteria; p__Firmicutes; c__Clostridia; o__Clostridiales; f__; g__; s__
New.ReferenceOTU184	-0.36784	0.174531	0.28577	k__Bacteria; p__Firmicutes; c__Clostridia; o__Clostridiales; f__Lachnospiraceae; g__; s__
New.CleanUp.ReferenceOTU19368	-0.367405	0.2087	0.317004	k__Bacteria; p__Firmicutes; c__Clostridia; o__Clostridiales; f__; g__; s__
New.CleanUp.ReferenceOTU26446	-0.367405	0.20585	0.316599	k__Bacteria; p__Firmicutes; c__Clostridia; o__Clostridiales; f__; g__; s__
New.CleanUp.ReferenceOTU27411	-0.367405	0.20585	0.316599	k__Bacteria; p__Firmicutes; c__Clostridia; o__Clostridiales; f__; g__; s__
New.CleanUp.ReferenceOTU71508	-0.367405	0.20585	0.316599	k__Bacteria; p__Firmicutes; c__Clostridia; o__Clostridiales; f__; g__; s__
276499	-0.366837	0.190732	0.301953	k__Bacteria; p__Firmicutes; c__Clostridia; o__Clostridiales; f__; g__; s__
293754	-0.366837	0.190732	0.301953	k__Bacteria; p__Firmicutes; c__Clostridia; o__Clostridiales; f__; g__; s__
New.CleanUp.ReferenceOTU39923	-0.366837	0.190732	0.301953	k__Bacteria; p__Firmicutes; c__Clostridia; o__Clostridiales; f__; g__; s__
New.CleanUp.ReferenceOTU62627	-0.366837	0.190732	0.301953	k__Bacteria; p__Firmicutes; c__Clostridia; o__Clostridiales; f__Ruminococcaceae; g__Oscillospira; s__
New.CleanUp.ReferenceOTU75176	-0.366837	0.190732	0.301953	k__Bacteria; p__Firmicutes; c__Clostridia; o__Clostridiales; f__; g__; s__
186650	-0.361873	0.253007	0.360997	k__Bacteria; p__Firmicutes; c__Clostridia; o__Clostridiales; f__; g__; s__
192878	-0.359573	0.177967	0.28577	k__Bacteria; p__Firmicutes; c__Clostridia; o__Clostridiales; f__Lachnospiraceae; g__Coprococcus; s__
463794	-0.359573	0.177967	0.28577	k__Bacteria; p__Firmicutes; c__Bacilli; o__Lactobacillales; f__Lactobacillaceae; g__Lactobacillus; s__
262095	-0.359573	0.177967	0.28577	k__Bacteria; p__Firmicutes; c__Erysipelotrichi; o__Erysipelotrichales; f__Erysipelotrichaceae; g__; s__
271822	-0.359573	0.177967	0.28577	k__Bacteria; p__Firmicutes; c__Clostridia; o__Clostridiales; f__; g__; s__
New.ReferenceOTU253	-0.359573	0.177967	0.28577	k__Bacteria; p__Verrucomicrobia; c__Verrucomicrobiae; o__Verrucomicrobiales; f__Verrucomicrobiaceae; g__Akkermansia; s__muciniphila
180468	-0.357548	0.198309	0.311996	k__Bacteria; p__Firmicutes; c__Clostridia; o__Clostridiales; f__Ruminococcaceae; g__Oscillospira; s__
New.ReferenceOTU55	-0.357548	0.198309	0.311996	k__Bacteria; p__Firmicutes; c__Clostridia; o__Clostridiales; f__Clostridiaceae; g__; s__
New.CleanUp.ReferenceOTU2789	-0.357548	0.198309	0.311996	k__Bacteria; p__Firmicutes; c__Clostridia; o__Clostridiales; f__Lachnospiraceae; g__; s__
289627	-0.356753	0.210021	0.318533	k__Bacteria; p__Firmicutes; c__Bacilli; o__Lactobacillales; f__Lactobacillaceae; g__Lactobacillus; s__
New.CleanUp.ReferenceOTU60141	-0.356753	0.217008	0.327167	k__Bacteria; p__Firmicutes; c__Clostridia; o__Clostridiales; f__Ruminococcaceae; g__Oscillospira; s__
New.CleanUp.ReferenceOTU69380	-0.356753	0.217008	0.327167	k__Bacteria; p__Verrucomicrobia; c__Verrucomicrobiae; o__Verrucomicrobiales; f__Verrucomicrobiaceae; g__Akkermansia; s__muciniphila
98048	-0.348932	0.201993	0.315818	k__Bacteria; p__Firmicutes; c__Clostridia; o__Clostridiales; f__Ruminococcaceae; g__Oscillospira; s__
New.CleanUp.ReferenceOTU9652	-0.348932	0.201993	0.315818	k__Bacteria; p__Firmicutes; c__Clostridia; o__Clostridiales; f__Ruminococcaceae; g__Oscillospira; s__
New.CleanUp.ReferenceOTU61670	-0.348932	0.203239	0.316309	k__Bacteria; p__Firmicutes; c__Clostridia; o__Clostridiales; f__Lachnospiraceae; g__; s__
189843	-0.346977	0.222396	0.333304	k__Bacteria; p__Firmicutes; c__Clostridia; o__Clostridiales; f__; g__; s__
New.CleanUp.ReferenceOTU57508	-0.346977	0.222396	0.333304	k__Bacteria; p__Firmicutes; c__Clostridia; o__Clostridiales; f__; g__; s__
New.CleanUp.ReferenceOTU58005	-0.346977	0.2251	0.336858	k__Bacteria; p__Bacteroidetes; c__Bacteroidia; o__Bacteroidales; f__Porphyromonadaceae; g__Parabacteroides; s__
New.CleanUp.ReferenceOTU66581	-0.346977	0.222396	0.333304	k__Bacteria; p__Firmicutes; c__Clostridia; o__Clostridiales; f__Ruminococcaceae; g__Ruminococcus; s__
189362	-0.346451	0.239216	0.34781	k__Bacteria; p__Firmicutes; c__Clostridia; o__Clostridiales; f__; g__; s__
182758	-0.346451	0.239216	0.34781	k__Bacteria; p__Firmicutes; c__Bacilli; o__Lactobacillales; f__Lactobacillaceae; g__Lactobacillus; s__
228043	-0.346451	0.239216	0.34781	k__Bacteria; p__Firmicutes; c__Clostridia; o__Clostridiales; f__; g__; s__
New.CleanUp.ReferenceOTU55451	-0.346451	0.239216	0.34781	k__Bacteria; p__Firmicutes; c__Clostridia; o__Clostridiales; f__Ruminococcaceae; g__Oscillospira; s__
New.CleanUp.ReferenceOTU69784	-0.346451	0.2437	0.350686	k__Bacteria; p__Firmicutes; c__Clostridia; o__Clostridiales; f__Ruminococcaceae; g__Ruminococcus; s__
New.CleanUp.ReferenceOTU70667	-0.346451	0.239216	0.34781	k__Bacteria; p__Firmicutes; c__Clostridia; o__Clostridiales; f__; g__; s__
New.CleanUp.ReferenceOTU8309	-0.341162	0.245867	0.351802	k__Bacteria; p__Firmicutes; c__Clostridia; o__Clostridiales; f__Ruminococcaceae
268063	-0.340909	0.206868	0.316599	k__Bacteria; p__Firmicutes; c__Clostridia; o__Clostridiales; f__; g__; s__
184966	-0.340909	0.206868	0.316599	k__Bacteria; p__Firmicutes; c__Clostridia; o__Clostridiales; f__; g__; s__
176868	-0.340909	0.206868	0.316599	k__Bacteria; p__Firmicutes; c__Clostridia; o__Clostridiales; f__Dehalobacteriaceae; g__Dehalobacterium; s__
199137	-0.337963	0.230349	0.342684	k__Bacteria; p__Firmicutes; c__Clostridia; o__Clostridiales; f__Lachnospiraceae; g__Coprococcus; s__
New.CleanUp.ReferenceOTU3027	-0.337963	0.230349	0.342684	k__Bacteria; p__Firmicutes; c__Clostridia; o__Clostridiales; f__; g__; s__
330460	-0.336107	0.245081	0.351174	k__Bacteria; p__Firmicutes; c__Clostridia; o__Clostridiales; f__; g__; s__
New.CleanUp.ReferenceOTU58284	-0.336107	0.245081	0.351174	k__Bacteria; p__Firmicutes; c__Clostridia; o__Clostridiales; f__; g__; s__
194529	-0.335936	0.268979	0.371883	k__Bacteria; p__Firmicutes; c__Clostridia; o__Clostridiales; f__; g__; s__
New.CleanUp.ReferenceOTU37095	-0.335936	0.268979	0.371883	k__Bacteria; p__Bacteroidetes; c__Bacteroidia; o__Bacteroidales; f__Porphyromonadaceae; g__Parabacteroides; s__
New.ReferenceOTU160	-0.329617	0.234204	0.34781	k__Bacteria; p__Firmicutes; c__Clostridia; o__Clostridiales; f__Ruminococcaceae; g__Oscillospira; s__
New.CleanUp.ReferenceOTU11622	-0.329617	0.235507	0.34781	k__Bacteria; p__Bacteroidetes; c__Bacteroidia; o__Bacteroidales; f__Porphyromonadaceae; g__Parabacteroides; s__
588471	-0.326637	0.25797	0.3655	k__Bacteria; p__Verrucomicrobia; c__Verrucomicrobiae; o__Verrucomicrobiales; f__Verrucomicrobiaceae; g__Akkermansia; s__muciniphila
New.CleanUp.ReferenceOTU66631	-0.326637	0.256556	0.364007	k__Bacteria; p__Firmicutes; c__Clostridia; o__Clostridiales; f__Ruminococcaceae; g__Oscillospira; s__
New.CleanUp.ReferenceOTU60169	-0.324918	0.278374	0.376719	k__Bacteria; p__Firmicutes; c__Clostridia; o__Clostridiales; f__Ruminococcaceae; g__Ruminococcus; s__
184903	-0.32186	0.239295	0.34781	k__Bacteria; p__Firmicutes; c__Clostridia; o__Clostridiales; f__Lachnospiraceae; g__Ruminococcus; s__gnavus
4446120	-0.32186	0.239295	0.34781	k__Bacteria; p__Firmicutes; c__Clostridia; o__Clostridiales; f__Ruminococcaceae; g__Oscillospira; s__
New.CleanUp.ReferenceOTU2268	-0.32186	0.239295	0.34781	k__Bacteria; p__Firmicutes; c__Clostridia; o__Clostridiales; f__Ruminococcaceae; g__; s__
New.CleanUp.ReferenceOTU27957	-0.32186	0.239295	0.34781	k__Bacteria; p__Firmicutes; c__Clostridia; o__Clostridiales; f__; g__; s__
174285	-0.317925	0.262075	0.368734	k__Bacteria; p__Firmicutes; c__Clostridia; o__Clostridiales; f__; g__; s__
268620	-0.317925	0.262075	0.368734	k__Bacteria; p__Firmicutes; c__Clostridia; o__Clostridiales; f__Lachnospiraceae; g__; s__
New.CleanUp.ReferenceOTU21606	-0.314918	0.284423	0.382109	k__Bacteria; p__Firmicutes; c__Clostridia; o__Clostridiales; f__; g__; s__
New.CleanUp.ReferenceOTU40249	-0.314918	0.284423	0.382109	k__Bacteria; p__Firmicutes; c__Clostridia; o__Clostridiales; f__; g__; s__
3957916	-0.314627	0.243035	0.350226	k__Bacteria; p__Firmicutes; c__Clostridia; o__Clostridiales; f__; g__; s__
New.ReferenceOTU12	-0.314627	0.243035	0.350226	k__Bacteria; p__Firmicutes; c__Clostridia; o__Clostridiales; f__Ruminococcaceae; g__; s__
170056	-0.309875	0.270194	0.371883	k__Bacteria; p__Firmicutes; c__Clostridia; o__Clostridiales; f__Lachnospiraceae; g__Ruminococcus; s__gnavus
269172	-0.309875	0.270194	0.371883	k__Bacteria; p__Firmicutes; c__Clostridia; o__Clostridiales; f__Ruminococcaceae; g__Oscillospira; s__
343420	-0.309875	0.270194	0.371883	k__Bacteria; p__Firmicutes; c__Clostridia; o__Clostridiales; f__; g__; s__
303326	-0.309875	0.270194	0.371883	k__Bacteria; p__Firmicutes; c__Clostridia; o__Clostridiales; f__; g__; s__
New.ReferenceOTU58	-0.309875	0.270194	0.371883	Unassigned
New.CleanUp.ReferenceOTU1358	-0.309875	0.270194	0.371883	Unassigned
New.CleanUp.ReferenceOTU10838	-0.309875	0.270194	0.371883	k__Bacteria; p__Firmicutes; c__Bacilli; o__Lactobacillales; f__Lactobacillaceae; g__Lactobacillus; s__
New.CleanUp.ReferenceOTU48589	-0.309875	0.270194	0.371883	k__Bacteria; p__Firmicutes; c__Clostridia; o__Clostridiales; f__Lachnospiraceae; g__; s__
New.CleanUp.ReferenceOTU64538	-0.309875	0.270194	0.371883	k__Bacteria; p__Firmicutes; c__Clostridia; o__Clostridiales; f__; g__; s__
New.CleanUp.ReferenceOTU70791	-0.309875	0.270194	0.371883	k__Bacteria; p__Firmicutes; c__Clostridia; o__Clostridiales; f__; g__; s__
314374	-0.305788	0.296209	0.390679	k__Bacteria; p__Firmicutes; c__Clostridia; o__Clostridiales; f__Dehalobacteriaceae; g__Dehalobacterium; s__
New.CleanUp.ReferenceOTU6577	-0.305788	0.296209	0.390679	k__Bacteria; p__Firmicutes; c__Clostridia; o__Clostridiales; f__Lachnospiraceae; g__; s__
New.CleanUp.ReferenceOTU26335	-0.305788	0.288844	0.385489	k__Bacteria; p__Firmicutes; c__Clostridia; o__Clostridiales; f__Ruminococcaceae; g__; s__
New.CleanUp.ReferenceOTU29848	-0.305788	0.296209	0.390679	k__Bacteria; p__Firmicutes; c__Clostridia; o__Clostridiales; f__Ruminococcaceae; g__; s__
New.CleanUp.ReferenceOTU46155	-0.305788	0.296209	0.390679	k__Bacteria; p__Firmicutes; c__Clostridia; o__Clostridiales; f__Lachnospiraceae; g__; s__
New.CleanUp.ReferenceOTU58191	-0.305788	0.296209	0.390679	k__Bacteria; p__Bacteroidetes; c__Bacteroidia; o__Bacteroidales; f__Porphyromonadaceae; g__Parabacteroides; s__
318503	-0.302407	0.27412	0.375533	k__Bacteria; p__Firmicutes; c__Clostridia; o__Clostridiales; f__; g__; s__
345582	-0.302407	0.275445	0.375533	k__Bacteria; p__Firmicutes; c__Clostridia; o__Clostridiales; f__Ruminococcaceae; g__Oscillospira; s__
New.ReferenceOTU163	-0.302407	0.275445	0.375533	k__Bacteria; p__Bacteroidetes; c__Bacteroidia; o__Bacteroidales; f__Porphyromonadaceae; g__Parabacteroides; s__
New.CleanUp.ReferenceOTU46439	-0.302407	0.275445	0.375533	k__Bacteria; p__Firmicutes; c__Erysipelotrichi; o__Erysipelotrichales; f__Erysipelotrichaceae; g__Clostridium
New.CleanUp.ReferenceOTU76976	-0.302407	0.275445	0.375533	k__Bacteria; p__Firmicutes; c__Clostridia; o__Clostridiales; f__Ruminococcaceae; g__; s__
New.CleanUp.ReferenceOTU44741	-0.301511	0.345742	0.431404	k__Bacteria; p__Firmicutes; c__Clostridia; o__Clostridiales; f__Ruminococcaceae; g__; s__
New.CleanUp.ReferenceOTU40743	-0.297842	0.32441	0.413845	k__Bacteria; p__Firmicutes; c__Clostridia; o__Clostridiales; f__; g__; s__
4379449	-0.297409	0.30468	0.399766	k__Bacteria; p__Firmicutes; c__Erysipelotrichi; o__Erysipelotrichales; f__Erysipelotrichaceae; g__Clostridium; s__saccharogumia
New.CleanUp.ReferenceOTU30590	-0.297409	0.301856	0.396576	Unassigned
New.CleanUp.ReferenceOTU59403	-0.297409	0.301856	0.396576	k__Bacteria; p__Bacteroidetes; c__Bacteroidia; o__Bacteroidales; f__S24-7; g__; s__
New.CleanUp.ReferenceOTU72208	-0.297409	0.301856	0.396576	k__Bacteria; p__Firmicutes; c__Clostridia; o__Clostridiales; f__Ruminococcaceae; g__Oscillospira; s__
264134	-0.295455	0.279294	0.376719	k__Bacteria; p__Firmicutes; c__Clostridia; o__Clostridiales; f__; g__; s__
4045626	-0.295455	0.279294	0.376719	k__Bacteria; p__Proteobacteria; c__Gammaproteobacteria; o__Oceanospirillales; f__Halomonadaceae; g__Halomonas; s__
269777	-0.295455	0.279294	0.376719	k__Bacteria; p__Firmicutes; c__Clostridia; o__Clostridiales; f__; g__; s__
New.ReferenceOTU64	-0.295455	0.279294	0.376719	k__Bacteria; p__Verrucomicrobia; c__Verrucomicrobiae; o__Verrucomicrobiales; f__Verrucomicrobiaceae; g__Akkermansia; s__muciniphila
New.ReferenceOTU142	-0.295455	0.279294	0.376719	k__Bacteria; p__Firmicutes; c__Clostridia; o__Clostridiales; f__Dehalobacteriaceae; g__Dehalobacterium; s__
New.CleanUp.ReferenceOTU44899	-0.29347	0.30673	0.400379	k__Bacteria; p__Firmicutes; c__Clostridia; o__Clostridiales; f__Ruminococcaceae; g__Oscillospira; s__
259504	-0.293151	0.326696	0.41415	k__Bacteria; p__Firmicutes; c__Clostridia; o__Clostridiales; f__Ruminococcaceae; g__Oscillospira; s__
New.ReferenceOTU215	-0.293151	0.326696	0.41415	k__Bacteria; p__Firmicutes; c__Clostridia; o__Clostridiales; f__; g__; s__
New.CleanUp.ReferenceOTU53531	-0.293151	0.326696	0.41415	k__Bacteria; p__Firmicutes; c__Clostridia; o__Clostridiales; f__Ruminococcaceae; g__Oscillospira; s__
New.CleanUp.ReferenceOTU55332	-0.293151	0.326696	0.41415	k__Bacteria; p__Firmicutes; c__Clostridia; o__Clostridiales; f__; g__; s__
New.CleanUp.ReferenceOTU8031	-0.289683	0.305986	0.400379	k__Bacteria; p__Firmicutes; c__Clostridia; o__Clostridiales; f__; g__; s__
New.CleanUp.ReferenceOTU33408	-0.289683	0.308763	0.400964	k__Bacteria; p__Firmicutes; c__Clostridia; o__Clostridiales; f__Ruminococcaceae; g__Ruminococcus; s__
New.CleanUp.ReferenceOTU56340	-0.289683	0.31014	0.402235	k__Bacteria; p__Bacteroidetes; c__Bacteroidia; o__Bacteroidales; f__Porphyromonadaceae; g__Parabacteroides; s__
New.CleanUp.ReferenceOTU75674	-0.289683	0.308763	0.400964	k__Bacteria; p__Firmicutes; c__Clostridia; o__Clostridiales; f__Ruminococcaceae
New.CleanUp.ReferenceOTU77600	-0.289683	0.308763	0.400964	k__Bacteria; p__Firmicutes; c__Clostridia; o__Clostridiales; f__Ruminococcaceae; g__Oscillospira; s__
New.CleanUp.ReferenceOTU53216	-0.284398	0.33272	0.419683	k__Bacteria; p__Firmicutes; c__Clostridia; o__Clostridiales; f__; g__; s__
New.CleanUp.ReferenceOTU56962	-0.284398	0.33272	0.419683	k__Bacteria; p__Firmicutes; c__Clostridia; o__Clostridiales; f__; g__; s__
New.CleanUp.ReferenceOTU72929	-0.284398	0.33272	0.419683	k__Bacteria; p__Firmicutes; c__Clostridia; o__Clostridiales; f__Ruminococcaceae
182061	-0.282529	0.314135	0.405337	k__Bacteria; p__Firmicutes; c__Clostridia; o__Clostridiales; f__Ruminococcaceae; g__; s__
New.CleanUp.ReferenceOTU43970	-0.282529	0.314135	0.405337	k__Bacteria; p__Bacteroidetes; c__Bacteroidia; o__Bacteroidales; f__Porphyromonadaceae; g__Parabacteroides; s__
New.CleanUp.ReferenceOTU51850	-0.279946	0.365766	0.44284	k__Bacteria; p__Firmicutes; c__Clostridia; o__Clostridiales; f__Ruminococcaceae; g__Ruminococcus; s__
New.CleanUp.ReferenceOTU58245	-0.279946	0.365766	0.44284	k__Bacteria; p__Firmicutes; c__Clostridia; o__Clostridiales; f__Ruminococcaceae; g__; s__
New.CleanUp.ReferenceOTU80174	-0.279946	0.365766	0.44284	k__Bacteria; p__Firmicutes; c__Clostridia; o__Clostridiales; f__Lachnospiraceae; g__; s__
274016	-0.276385	0.344417	0.431404	k__Bacteria; p__Firmicutes; c__Bacilli; o__Lactobacillales; f__Lactobacillaceae; g__Lactobacillus; s__
188862	-0.276385	0.34585	0.431404	k__Bacteria; p__Firmicutes; c__Clostridia; o__Clostridiales; f__Ruminococcaceae; g__Oscillospira; s__
4306202	-0.276385	0.344417	0.431404	k__Bacteria; p__Proteobacteria; c__Gammaproteobacteria; o__Oceanospirillales; f__Halomonadaceae; g__Halomonas; s__campisalis
New.CleanUp.ReferenceOTU8960	-0.276385	0.344417	0.431404	k__Bacteria; p__Firmicutes; c__Clostridia; o__Clostridiales; f__; g__; s__
New.CleanUp.ReferenceOTU58562	-0.276385	0.34585	0.431404	k__Bacteria; p__Firmicutes; c__Clostridia; o__Clostridiales; f__Lachnospiraceae; g__; s__
New.CleanUp.ReferenceOTU75312	-0.276385	0.34585	0.431404	k__Bacteria; p__Firmicutes; c__Clostridia; o__Clostridiales; f__Ruminococcaceae
271045	-0.27588	0.31939	0.410027	k__Bacteria; p__Firmicutes; c__Clostridia; o__Clostridiales; f__Lachnospiraceae; g__; s__
261486	-0.27588	0.31939	0.410027	k__Bacteria; p__Firmicutes; c__Clostridia; o__Clostridiales; f__Ruminococcaceae; g__; s__
262428	-0.27136	0.401965	0.471189	k__Bacteria; p__Firmicutes; c__Clostridia; o__Clostridiales; f__; g__; s__
New.ReferenceOTU273	-0.270765	0.375137	0.451243	k__Bacteria; p__Firmicutes; c__Clostridia; o__Clostridiales; f__; g__; s__
New.CleanUp.ReferenceOTU16462	-0.270765	0.375137	0.451243	k__Bacteria; p__Bacteroidetes; c__Bacteroidia; o__Bacteroidales; f__Porphyromonadaceae; g__Parabacteroides; s__
259983	-0.26968	0.323236	0.412869	k__Bacteria; p__Firmicutes; c__Clostridia; o__Clostridiales; f__Lachnospiraceae; g__Ruminococcus; s__gnavus
176118	-0.26968	0.323236	0.412869	k__Bacteria; p__Firmicutes; c__Clostridia; o__Clostridiales; f__Ruminococcaceae; g__Oscillospira; s__
258946	-0.269014	0.350003	0.43551	k__Bacteria; p__Firmicutes; c__Clostridia; o__Clostridiales; f__Ruminococcaceae; g__Oscillospira; s__
326702	-0.269014	0.352791	0.43683	k__Bacteria; p__Firmicutes; c__Clostridia; o__Clostridiales; f__; g__; s__
New.CleanUp.ReferenceOTU37417	-0.269014	0.352791	0.43683	k__Bacteria; p__Verrucomicrobia; c__Verrucomicrobiae; o__Verrucomicrobiales; f__Verrucomicrobiaceae; g__Akkermansia; s__muciniphila
New.CleanUp.ReferenceOTU69346	-0.269014	0.352791	0.43683	k__Bacteria; p__Firmicutes; c__Bacilli; o__Lactobacillales; f__Lactobacillaceae; g__Lactobacillus; s__
New.CleanUp.ReferenceOTU4444	-0.262432	0.384118	0.457154	k__Bacteria; p__Firmicutes; c__Clostridia; o__Clostridiales; f__Dehalobacteriaceae; g__Dehalobacterium; s__
New.CleanUp.ReferenceOTU50297	-0.262432	0.384118	0.457154	Unassigned
New.CleanUp.ReferenceOTU52979	-0.262432	0.381133	0.457154	k__Bacteria; p__Firmicutes; c__Clostridia; o__Clostridiales; f__Ruminococcaceae; g__Oscillospira; s__
New.CleanUp.ReferenceOTU67843	-0.262432	0.384118	0.457154	Unassigned
New.CleanUp.ReferenceOTU75409	-0.262432	0.384118	0.457154	k__Bacteria; p__Firmicutes; c__Clostridia; o__Clostridiales; f__Ruminococcaceae; g__; s__
194269	-0.262202	0.358176	0.441875	k__Bacteria; p__Firmicutes; c__Clostridia; o__Clostridiales; f__Ruminococcaceae; g__; s__
New.CleanUp.ReferenceOTU17779	-0.262202	0.358176	0.441875	k__Bacteria; p__Firmicutes; c__Clostridia; o__Clostridiales; f__Lachnospiraceae; g__; s__
New.CleanUp.ReferenceOTU43160	-0.262202	0.358176	0.441875	k__Bacteria; p__Firmicutes; c__Clostridia; o__Clostridiales; f__Lachnospiraceae; g__Coprococcus; s__
265503	-0.255883	0.363434	0.44284	k__Bacteria; p__Firmicutes; c__Clostridia; o__Clostridiales; f__Lachnospiraceae; g__Ruminococcus; s__gnavus
New.ReferenceOTU264	-0.255883	0.363434	0.44284	k__Bacteria; p__Firmicutes; c__Clostridia; o__Clostridiales; f__Lachnospiraceae; g__Coprococcus; s__
863682	-0.254824	0.392734	0.46305	k__Bacteria; p__Firmicutes; c__Clostridia; o__Clostridiales; f__; g__; s__
303841	-0.254824	0.392734	0.46305	k__Bacteria; p__Firmicutes; c__Clostridia; o__Clostridiales; f__Lachnospiraceae; g__; s__
332854	-0.254824	0.392734	0.46305	k__Bacteria; p__Firmicutes; c__Clostridia; o__Clostridiales; f__; g__; s__
3694603	-0.254824	0.385497	0.457718	k__Bacteria; p__Firmicutes; c__Clostridia; o__Clostridiales; f__Lachnospiraceae; g__; s__
New.CleanUp.ReferenceOTU5784	-0.254824	0.392734	0.46305	Unassigned
New.CleanUp.ReferenceOTU24027	-0.254824	0.392734	0.46305	k__Bacteria; p__Firmicutes; c__Clostridia; o__Clostridiales; f__; g__; s__
New.CleanUp.ReferenceOTU55615	-0.254824	0.385497	0.457718	k__Bacteria; p__Firmicutes; c__Clostridia; o__Clostridiales; f__Lachnospiraceae; g__; s__
New.CleanUp.ReferenceOTU2157	-0.251952	0.421432	0.479559	k__Bacteria; p__Firmicutes; c__Clostridia; o__Clostridiales; f__Ruminococcaceae; g__; s__
New.CleanUp.ReferenceOTU30023	-0.251952	0.421432	0.479559	k__Bacteria; p__Bacteroidetes; c__Bacteroidia; o__Bacteroidales; f__Porphyromonadaceae; g__Parabacteroides; s__
274455	-0.25	0.367276	0.44284	k__Bacteria; p__Firmicutes; c__Clostridia; o__Clostridiales; f__Lachnospiraceae; g__Coprococcus; s__
New.CleanUp.ReferenceOTU70230	-0.25	0.367276	0.44284	k__Bacteria; p__Firmicutes; c__Clostridia; o__Clostridiales; f__; g__; s__
New.CleanUp.ReferenceOTU34956	-0.247841	0.398256	0.468469	k__Bacteria; p__Firmicutes; c__Clostridia; o__Clostridiales; f__; g__; s__
New.CleanUp.ReferenceOTU75689	-0.247841	0.398256	0.468469	k__Bacteria; p__Firmicutes; c__Clostridia; o__Clostridiales; f__; g__; s__
New.CleanUp.ReferenceOTU18554	-0.246183	0.454174	0.505433	k__Bacteria; p__Actinobacteria; c__Coriobacteriia; o__Coriobacteriales; f__Coriobacteriaceae; g__Adlercreutzia; s__
New.ReferenceOTU68	-0.243689	0.430493	0.488771	k__Bacteria; p__Firmicutes; c__Clostridia; o__Clostridiales; f__Ruminococcaceae; g__Oscillospira; s__
177590	-0.241402	0.404979	0.473623	k__Bacteria; p__Firmicutes; c__Clostridia; o__Clostridiales; f__; g__; s__
163153	-0.241402	0.406315	0.47409	k__Bacteria; p__Firmicutes; c__Clostridia; o__Clostridiales; f__Ruminococcaceae; g__Oscillospira; s__
New.CleanUp.ReferenceOTU65969	-0.241402	0.404979	0.473623	k__Bacteria; p__Firmicutes; c__Clostridia; o__Clostridiales; f__Lachnospiraceae; g__; s__
New.CleanUp.ReferenceOTU8158	-0.241209	0.463344	0.506185	k__Bacteria; p__Firmicutes; c__Clostridia; o__Clostridiales; f__Ruminococcaceae; g__Oscillospira; s__
New.CleanUp.ReferenceOTU10705	-0.241209	0.463344	0.506185	k__Bacteria; p__Bacteroidetes; c__Bacteroidia; o__Bacteroidales; f__Porphyromonadaceae; g__Parabacteroides; s__
New.CleanUp.ReferenceOTU23508	-0.241209	0.463344	0.506185	k__Bacteria; p__Bacteroidetes; c__Bacteroidia; o__Bacteroidales; f__S24-7; g__; s__
New.CleanUp.ReferenceOTU50585	-0.241209	0.463344	0.506185	k__Bacteria; p__Bacteroidetes; c__Bacteroidia; o__Bacteroidales; f__Porphyromonadaceae; g__Parabacteroides; s__
782953	-0.239851	0.432669	0.489046	k__Bacteria; p__Proteobacteria; c__Gammaproteobacteria; o__Enterobacteriales; f__Enterobacteriaceae; g__; s__
New.CleanUp.ReferenceOTU38626	-0.239851	0.432669	0.489046	k__Bacteria; p__Firmicutes; c__Clostridia; o__Clostridiales; f__Ruminococcaceae; g__; s__
New.CleanUp.ReferenceOTU84216	-0.239851	0.432669	0.489046	k__Bacteria; p__Firmicutes; c__Clostridia; o__Clostridiales; f__Clostridiaceae; g__; s__
New.CleanUp.ReferenceOTU5597	-0.236189	0.439149	0.493065	k__Bacteria; p__Firmicutes; c__Clostridia; o__Clostridiales; f__Ruminococcaceae; g__Oscillospira; s__
4393892	-0.235441	0.410185	0.475861	k__Bacteria; p__Firmicutes; c__Clostridia; o__Clostridiales; f__; g__; s__
175939	-0.235441	0.410185	0.475861	k__Bacteria; p__Firmicutes; c__Clostridia; o__Clostridiales; f__Ruminococcaceae; g__Oscillospira; s__
New.CleanUp.ReferenceOTU84345	-0.235441	0.410185	0.475861	k__Bacteria; p__Firmicutes; c__Clostridia; o__Clostridiales; f__Lachnospiraceae; g__; s__
New.CleanUp.ReferenceOTU1726	-0.232689	0.438387	0.492756	k__Bacteria; p__Firmicutes; c__Clostridia; o__Clostridiales; f__Ruminococcaceae; g__Ruminococcus; s__
New.CleanUp.ReferenceOTU22049	-0.232689	0.438387	0.492756	k__Bacteria; p__Firmicutes; c__Clostridia; o__Clostridiales; f__; g__; s__
New.CleanUp.ReferenceOTU41091	-0.232689	0.438387	0.492756	k__Bacteria; p__Firmicutes; c__Clostridia; o__Clostridiales; f__Lachnospiraceae; g__; s__
New.ReferenceOTU126	-0.2299	0.415259	0.479559	k__Bacteria; p__Bacteroidetes; c__Bacteroidia; o__Bacteroidales; f__Porphyromonadaceae; g__Parabacteroides; s__
New.CleanUp.ReferenceOTU70653	-0.2299	0.415259	0.479559	k__Bacteria; p__Verrucomicrobia; c__Verrucomicrobiae; o__Verrucomicrobiales; f__Verrucomicrobiaceae; g__Akkermansia; s__muciniphila
373909	-0.229341	0.44743	0.50125	k__Bacteria; p__Firmicutes; c__Clostridia; o__Clostridiales; f__Ruminococcaceae; g__Oscillospira; s__
263946	-0.226133	0.449422	0.502369	k__Bacteria; p__Firmicutes; c__Clostridia; o__Clostridiales; f__Lachnospiraceae; g__Ruminococcus; s__gnavus
New.CleanUp.ReferenceOTU46433	-0.226133	0.452104	0.504253	k__Bacteria; p__Verrucomicrobia; c__Verrucomicrobiae; o__Verrucomicrobiales; f__Verrucomicrobiaceae; g__Akkermansia; s__muciniphila
269125	-0.224733	0.418962	0.479559	k__Bacteria; p__Firmicutes; c__Bacilli; o__Lactobacillales; f__Lactobacillaceae; g__Lactobacillus; s__
274400	-0.224733	0.418962	0.479559	k__Bacteria; p__Firmicutes; c__Clostridia; o__Clostridiales; f__Lachnospiraceae; g__Coprococcus; s__
New.CleanUp.ReferenceOTU23348	-0.223957	0.481777	0.517383	k__Bacteria; p__Firmicutes; c__Clostridia; o__Clostridiales; f__; g__; s__
New.ReferenceOTU141	-0.220102	0.454661	0.505433	k__Bacteria; p__Firmicutes; c__Clostridia; o__Clostridiales; f__Ruminococcaceae; g__Oscillospira; s__
New.CleanUp.ReferenceOTU55841	-0.220102	0.457269	0.506185	k__Bacteria; p__Firmicutes; c__Clostridia; o__Clostridiales; f__; g__; s__
New.CleanUp.ReferenceOTU74478	-0.220102	0.457269	0.506185	k__Bacteria; p__Firmicutes; c__Clostridia; o__Clostridiales; f__; g__; s__
New.CleanUp.ReferenceOTU44951	-0.21541	0.502691	0.533052	k__Bacteria; p__Bacteroidetes; c__Bacteroidia; o__Bacteroidales; f__Porphyromonadaceae; g__Parabacteroides; s__
275616	-0.214529	0.462293	0.506185	k__Bacteria; p__Firmicutes; c__Clostridia; o__Clostridiales; f__Ruminococcaceae; g__Oscillospira; s__
New.ReferenceOTU78	-0.214529	0.462293	0.506185	k__Bacteria; p__Firmicutes; c__Clostridia; o__Clostridiales; f__; g__; s__
New.ReferenceOTU227	-0.214529	0.462293	0.506185	k__Bacteria; p__Firmicutes; c__Clostridia; o__Clostridiales; f__Ruminococcaceae; g__Ruminococcus; s__
New.CleanUp.ReferenceOTU17152	-0.214529	0.462293	0.506185	k__Bacteria; p__Verrucomicrobia; c__Verrucomicrobiae; o__Verrucomicrobiales; f__Verrucomicrobiaceae; g__Akkermansia; s__muciniphila
New.CleanUp.ReferenceOTU36857	-0.214529	0.462293	0.506185	k__Bacteria; p__Firmicutes; c__Clostridia; o__Clostridiales; f__Ruminococcaceae; g__; s__
New.CleanUp.ReferenceOTU37740	-0.214529	0.462293	0.506185	k__Bacteria; p__Firmicutes; c__Clostridia; o__Clostridiales; f__Lachnospiraceae; g__; s__
New.CleanUp.ReferenceOTU38541	-0.214529	0.462293	0.506185	k__Bacteria; p__Bacteroidetes; c__Bacteroidia; o__Bacteroidales; f__Porphyromonadaceae; g__Parabacteroides; s__
New.CleanUp.ReferenceOTU53410	-0.214529	0.462293	0.506185	k__Bacteria; p__Firmicutes; c__Clostridia; o__Clostridiales; f__Ruminococcaceae; g__Oscillospira; s__
New.CleanUp.ReferenceOTU83356	-0.213201	0.492364	0.527074	k__Bacteria; p__Firmicutes; c__Clostridia; o__Clostridiales; f__Ruminococcaceae; g__Ruminococcus; s__
New.CleanUp.ReferenceOTU27139	-0.209946	0.501109	0.531933	k__Bacteria; p__Bacteroidetes; c__Bacteroidia; o__Bacteroidales; f__S24-7; g__; s__
New.CleanUp.ReferenceOTU67690	-0.209946	0.498453	0.530783	k__Bacteria; p__Firmicutes; c__Clostridia; o__Clostridiales; f__; g__; s__
New.CleanUp.ReferenceOTU69863	-0.209946	0.498453	0.530783	k__Bacteria; p__Firmicutes; c__Clostridia; o__Clostridiales; f__Clostridiaceae; g__; s__
New.CleanUp.ReferenceOTU79717	-0.209946	0.498453	0.530783	k__Bacteria; p__Firmicutes; c__Clostridia; o__Clostridiales; f__Ruminococcaceae; g__Ruminococcus; s__
557974	-0.209359	0.467182	0.507092	k__Bacteria; p__Proteobacteria; c__Gammaproteobacteria; o__Pseudomonadales; f__Pseudomonadaceae; g__Pseudomonas; s__
New.ReferenceOTU128	-0.209359	0.465951	0.507092	k__Bacteria; p__Bacteroidetes; c__Bacteroidia; o__Bacteroidales; f__Porphyromonadaceae; g__Parabacteroides; s__
New.CleanUp.ReferenceOTU33481	-0.209359	0.467182	0.507092	k__Bacteria; p__Bacteroidetes; c__Bacteroidia; o__Bacteroidales; f__S24-7; g__; s__
304080	-0.204545	0.470743	0.507689	k__Bacteria; p__Firmicutes; c__Clostridia; o__Clostridiales; f__; g__; s__
190273	-0.204545	0.470743	0.507689	k__Bacteria; p__Firmicutes; c__Clostridia; o__Clostridiales; f__Lachnospiraceae; g__; s__
New.CleanUp.ReferenceOTU11510	-0.204545	0.470743	0.507689	k__Bacteria; p__Firmicutes; c__Clostridia; o__Clostridiales; f__Ruminococcaceae; g__Oscillospira; s__
New.CleanUp.ReferenceOTU11045	-0.203859	0.506215	0.53399	k__Bacteria; p__Firmicutes; c__Clostridia; o__Clostridiales; f__Ruminococcaceae; g__; s__
New.CleanUp.ReferenceOTU19327	-0.203859	0.506215	0.53399	k__Bacteria; p__Firmicutes; c__Clostridia; o__Clostridiales; f__Ruminococcaceae; g__Ruminococcus; s__
New.CleanUp.ReferenceOTU42312	-0.203859	0.506215	0.53399	k__Bacteria; p__Firmicutes; c__Clostridia; o__Clostridiales; f__Ruminococcaceae
New.CleanUp.ReferenceOTU6867	-0.198273	0.511168	0.537533	k__Bacteria; p__Firmicutes; c__Clostridia; o__Clostridiales; f__; g__; s__
New.CleanUp.ReferenceOTU64749	-0.198273	0.511168	0.537533	k__Bacteria; p__Firmicutes; c__Clostridia; o__Clostridiales
New.CleanUp.ReferenceOTU15054	-0.195962	0.546539	0.559604	k__Bacteria; p__Firmicutes; c__Clostridia; o__Clostridiales; f__Ruminococcaceae; g__; s__
264429	-0.193122	0.517176	0.539923	k__Bacteria; p__Firmicutes; c__Clostridia; o__Clostridiales; f__Ruminococcaceae; g__Oscillospira; s__
New.CleanUp.ReferenceOTU76221	-0.193122	0.514767	0.539635	k__Bacteria; p__Verrucomicrobia; c__Verrucomicrobiae; o__Verrucomicrobiales; f__Verrucomicrobiaceae; g__Akkermansia; s__muciniphila
New.CleanUp.ReferenceOTU84802	-0.193122	0.517176	0.539923	k__Bacteria; p__Firmicutes; c__Clostridia; o__Clostridiales; f__; g__; s__
New.CleanUp.ReferenceOTU23544	-0.189536	0.554345	0.56437	k__Bacteria; p__Bacteroidetes; c__Bacteroidia; o__Bacteroidales; f__Porphyromonadaceae; g__Parabacteroides; s__
New.CleanUp.ReferenceOTU30908	-0.188353	0.521813	0.541967	k__Bacteria; p__Firmicutes; c__Clostridia; o__Clostridiales; f__; g__; s__
309290	-0.186551	0.556214	0.56437	k__Bacteria; p__Firmicutes; c__Clostridia; o__Clostridiales; f__Ruminococcaceae; g__Oscillospira; s__
New.CleanUp.ReferenceOTU16533	-0.186551	0.556214	0.56437	Unassigned
New.CleanUp.ReferenceOTU29907	-0.186551	0.556214	0.56437	k__Bacteria; p__Firmicutes; c__Clostridia; o__Clostridiales; f__; g__; s__
New.CleanUp.ReferenceOTU42602	-0.186551	0.556214	0.56437	k__Bacteria; p__Firmicutes; c__Clostridia; o__Clostridiales; f__Ruminococcaceae; g__Oscillospira; s__
New.CleanUp.ReferenceOTU50091	-0.186551	0.556214	0.56437	k__Bacteria; p__Firmicutes; c__Clostridia; o__Clostridiales; f__Ruminococcaceae; g__Oscillospira; s__
New.CleanUp.ReferenceOTU83724	-0.186551	0.556214	0.56437	k__Bacteria; p__Firmicutes; c__Clostridia; o__Clostridiales; f__; g__; s__
265363	-0.18392	0.526319	0.54283	k__Bacteria; p__Firmicutes; c__Clostridia; o__Clostridiales; f__Clostridiaceae; g__; s__
New.ReferenceOTU75	-0.18392	0.526319	0.54283	Unassigned
New.CleanUp.ReferenceOTU72636	-0.183702	0.561764	0.564902	Unassigned
268978	-0.180981	0.561113	0.564808	k__Bacteria; p__Firmicutes; c__Clostridia; o__Clostridiales; f__Lachnospiraceae; g__; s__
New.ReferenceOTU72	-0.180981	0.561113	0.564808	k__Bacteria; p__Firmicutes; c__Clostridia; o__Clostridiales; f__; g__; s__
New.CleanUp.ReferenceOTU4109	-0.180981	0.561113	0.564808	k__Bacteria; p__Firmicutes; c__Clostridia; o__Clostridiales; f__; g__; s__
New.CleanUp.ReferenceOTU73684	-0.180981	0.561113	0.564808	k__Bacteria; p__Firmicutes; c__Clostridia; o__Clostridiales; f__; g__; s__
4425571	-0.180907	0.600402	0.586272	k__Bacteria; p__Proteobacteria; c__Gammaproteobacteria; o__Enterobacteriales; f__Enterobacteriaceae; g__; s__
330296	-0.179787	0.529599	0.54283	k__Bacteria; p__Firmicutes; c__Clostridia; o__Clostridiales; f__; g__; s__
261590	-0.179787	0.529599	0.54283	k__Bacteria; p__Firmicutes; c__Clostridia; o__Clostridiales; f__Peptostreptococcaceae; g__; s__
263337	-0.179787	0.529599	0.54283	k__Bacteria; p__Firmicutes; c__Clostridia; o__Clostridiales; f__Ruminococcaceae; g__Oscillospira; s__
189288	-0.179787	0.529599	0.54283	k__Bacteria; p__Firmicutes; c__Clostridia; o__Clostridiales; f__Lachnospiraceae; g__; s__
162005	-0.179787	0.529599	0.54283	k__Bacteria; p__Firmicutes; c__Clostridia; o__Clostridiales; f__Ruminococcaceae; g__Oscillospira; s__
338345	-0.178377	0.562898	0.56548	k__Bacteria; p__Firmicutes; c__Clostridia; o__Clostridiales; f__Lachnospiraceae; g__; s__
259266	-0.174078	0.602955	0.588197	k__Bacteria; p__Firmicutes; c__Erysipelotrichi; o__Erysipelotrichales; f__Erysipelotrichaceae; g__; s__
199268	-0.171191	0.577177	0.573559	k__Bacteria; p__Firmicutes; c__Clostridia; o__Clostridiales; f__Clostridiaceae; g__; s__
175114	-0.171191	0.574968	0.573053	k__Bacteria; p__Firmicutes; c__Clostridia; o__Clostridiales; f__; g__; s__
New.ReferenceOTU156	-0.171191	0.574968	0.573053	k__Bacteria; p__Firmicutes; c__Clostridia; o__Clostridiales; f__; g__; s__
New.CleanUp.ReferenceOTU13150	-0.171191	0.577177	0.573559	k__Bacteria; p__Firmicutes; c__Clostridia; o__Clostridiales; f__Lachnospiraceae; g__Coprococcus; s__
New.CleanUp.ReferenceOTU18887	-0.171191	0.574968	0.573053	k__Bacteria; p__Firmicutes; c__Clostridia; o__Clostridiales; f__Lachnospiraceae; g__; s__
New.CleanUp.ReferenceOTU63691	-0.171191	0.574968	0.573053	Unassigned
New.CleanUp.ReferenceOTU38313	-0.167968	0.615342	0.596828	k__Bacteria; p__Firmicutes; c__Clostridia; o__Clostridiales; f__; g__; s__
New.CleanUp.ReferenceOTU44049	-0.167968	0.615342	0.596828	k__Bacteria; p__Firmicutes; c__Clostridia; o__Clostridiales; f__; g__; s__
New.CleanUp.ReferenceOTU48381	-0.167968	0.615342	0.596828	k__Bacteria; p__Firmicutes; c__Erysipelotrichi; o__Erysipelotrichales; f__Erysipelotrichaceae; g__; s__
New.CleanUp.ReferenceOTU59181	-0.167968	0.615342	0.596828	k__Bacteria; p__Bacteroidetes; c__Bacteroidia; o__Bacteroidales; f__S24-7; g__; s__
New.CleanUp.ReferenceOTU51676	-0.166856	0.581423	0.574954	k__Bacteria; p__Firmicutes; c__Clostridia; o__Clostridiales; f__Ruminococcaceae
New.ReferenceOTU7	-0.164809	0.582974	0.575245	k__Bacteria; p__Verrucomicrobia; c__Verrucomicrobiae; o__Verrucomicrobiales; f__Verrucomicrobiaceae; g__Akkermansia; s__muciniphila
316496	-0.164488	0.647506	0.600376	k__Bacteria; p__Firmicutes; c__Clostridia; o__Clostridiales; f__Clostridiaceae; g__SMB53; s__
272768	-0.162835	0.584508	0.575245	k__Bacteria; p__Firmicutes; c__Clostridia; o__Clostridiales; f__; g__; s__
New.ReferenceOTU19	-0.162835	0.585544	0.575245	k__Bacteria; p__Firmicutes; c__Clostridia; o__Clostridiales; f__; g__; s__
New.ReferenceOTU261	-0.162835	0.585544	0.575245	k__Bacteria; p__Firmicutes; c__Clostridia; o__Clostridiales; f__; g__; s__
New.CleanUp.ReferenceOTU17475	-0.162835	0.585544	0.575245	k__Bacteria; p__Firmicutes; c__Clostridia; o__Clostridiales; f__Peptostreptococcaceae; g__; s__
372146	-0.162459	0.622212	0.600376	k__Bacteria; p__Firmicutes; c__Clostridia; o__Clostridiales; f__Ruminococcaceae; g__Oscillospira; s__
New.CleanUp.ReferenceOTU38704	-0.162459	0.622212	0.600376	k__Bacteria; p__Verrucomicrobia; c__Verrucomicrobiae; o__Verrucomicrobiales; f__Verrucomicrobiaceae; g__Akkermansia; s__muciniphila
New.CleanUp.ReferenceOTU48050	-0.162459	0.622212	0.600376	k__Bacteria; p__Firmicutes; c__Clostridia; o__Clostridiales; f__Dehalobacteriaceae; g__Dehalobacterium; s__
268475	-0.159091	0.58854	0.575245	k__Bacteria; p__Firmicutes; c__Clostridia; o__Clostridiales; f__Ruminococcaceae; g__Oscillospira; s__
262556	-0.159091	0.58854	0.575245	k__Bacteria; p__Firmicutes; c__Clostridia; o__Clostridiales; f__; g__; s__
196194	-0.159091	0.58854	0.575245	k__Bacteria; p__Firmicutes; c__Clostridia; o__Clostridiales; f__Ruminococcaceae; g__Oscillospira; s__
196533	-0.157459	0.630849	0.600376	k__Bacteria; p__Firmicutes; c__Clostridia; o__Clostridiales; f__Lachnospiraceae; g__; s__
New.CleanUp.ReferenceOTU4640	-0.157459	0.630849	0.600376	k__Bacteria; p__Firmicutes; c__Clostridia; o__Clostridiales; f__Lachnospiraceae; g__; s__
New.CleanUp.ReferenceOTU13308	-0.157459	0.628727	0.600376	k__Bacteria; p__Firmicutes; c__Clostridia; o__Clostridiales; f__Ruminococcaceae; g__Oscillospira; s__
New.CleanUp.ReferenceOTU21579	-0.157459	0.626569	0.600376	k__Bacteria; p__Firmicutes; c__Bacilli; o__Lactobacillales; f__Lactobacillaceae; g__Lactobacillus; s__
New.CleanUp.ReferenceOTU31134	-0.157459	0.626569	0.600376	k__Bacteria; p__Firmicutes; c__Clostridia; o__Clostridiales; f__Lachnospiraceae; g__; s__
New.CleanUp.ReferenceOTU71911	-0.157459	0.626569	0.600376	k__Bacteria; p__Firmicutes; c__Clostridia; o__Clostridiales; f__; g__; s__
New.CleanUp.ReferenceOTU59418	-0.157174	0.653004	0.600376	k__Bacteria; p__Firmicutes; c__Clostridia; o__Clostridiales; f__; g__; s__
New.CleanUp.ReferenceOTU23689	-0.152894	0.634918	0.600376	k__Bacteria; p__Firmicutes; c__Clostridia; o__Clostridiales; f__Lachnospiraceae; g__; s__
New.CleanUp.ReferenceOTU49829	-0.152894	0.634918	0.600376	k__Bacteria; p__Firmicutes; c__Clostridia; o__Clostridiales; f__Ruminococcaceae; g__Ruminococcus; s__
New.CleanUp.ReferenceOTU66361	-0.152894	0.634918	0.600376	k__Bacteria; p__Firmicutes; c__Clostridia; o__Clostridiales; f__Ruminococcaceae; g__Ruminococcus; s__
New.CleanUp.ReferenceOTU30300	-0.148704	0.638855	0.600376	k__Bacteria; p__Firmicutes; c__Clostridia; o__Clostridiales; f__; g__; s__
22659	-0.144841	0.644561	0.600376	k__Bacteria; p__Proteobacteria; c__Gammaproteobacteria; o__Oceanospirillales; f__Halomonadaceae; g__Halomonas; s__
New.CleanUp.ReferenceOTU24737	-0.144841	0.644561	0.600376	k__Bacteria; p__Firmicutes; c__Clostridia; o__Clostridiales; f__Dehalobacteriaceae; g__Dehalobacterium; s__
New.CleanUp.ReferenceOTU46079	-0.144841	0.644561	0.600376	k__Bacteria; p__Firmicutes; c__Clostridia; o__Clostridiales; f__; g__; s__
292521	-0.143019	0.645931	0.600376	k__Bacteria; p__Actinobacteria; c__Actinobacteria; o__Bifidobacteriales; f__Bifidobacteriaceae; g__Bifidobacterium; s__
193678	-0.141264	0.647284	0.600376	k__Bacteria; p__Firmicutes; c__Clostridia; o__Clostridiales; f__Ruminococcaceae; g__; s__
New.CleanUp.ReferenceOTU45540	-0.141264	0.647284	0.600376	k__Bacteria; p__Firmicutes; c__Clostridia; o__Clostridiales; f__Lachnospiraceae; g__; s__
New.CleanUp.ReferenceOTU60538	-0.141264	0.647284	0.600376	k__Bacteria; p__Firmicutes; c__Clostridia; o__Clostridiales; f__; g__; s__
New.CleanUp.ReferenceOTU79421	-0.141264	0.647284	0.600376	k__Bacteria; p__Firmicutes; c__Clostridia; o__Clostridiales; f__Ruminococcaceae; g__Oscillospira; s__
New.CleanUp.ReferenceOTU12722	-0.139573	0.649526	0.600376	k__Bacteria; p__Firmicutes; c__Clostridia; o__Clostridiales; f__Dehalobacteriaceae; g__Dehalobacterium; s__
New.CleanUp.ReferenceOTU50735	-0.139573	0.649526	0.600376	k__Bacteria; p__Firmicutes; c__Clostridia; o__Clostridiales; f__Lachnospiraceae; g__; s__
346804	-0.13794	0.650839	0.600376	k__Bacteria; p__Firmicutes; c__Clostridia; o__Clostridiales; f__Ruminococcaceae; g__; s__
198753	-0.13794	0.650839	0.600376	k__Bacteria; p__Firmicutes; c__Clostridia; o__Clostridiales; f__Ruminococcaceae; g__; s__
150412	-0.13794	0.650839	0.600376	k__Bacteria; p__Bacteroidetes; c__Bacteroidia; o__Bacteroidales; f__Porphyromonadaceae; g__Parabacteroides; s__gordonii
New.CleanUp.ReferenceOTU75733	-0.13794	0.650839	0.600376	k__Bacteria; p__Firmicutes; c__Clostridia; o__Clostridiales; f__Ruminococcaceae; g__Ruminococcus; s__
189840	-0.13484	0.653422	0.600376	k__Bacteria; p__Firmicutes; c__Clostridia; o__Clostridiales; f__Ruminococcaceae; g__; s__
174824	-0.13484	0.653422	0.600376	k__Bacteria; p__Firmicutes; c__Clostridia; o__Clostridiales; f__; g__; s__
267042	-0.13484	0.653422	0.600376	k__Bacteria; p__Firmicutes; c__Clostridia; o__Clostridiales; f__Ruminococcaceae; g__Ruminococcus; s__
4372003	-0.13484	0.653422	0.600376	k__Bacteria; p__Bacteroidetes; c__Bacteroidia; o__Bacteroidales; f__Porphyromonadaceae; g__Parabacteroides; s__
790663	-0.13484	0.653422	0.600376	k__Bacteria; p__Firmicutes; c__Clostridia; o__Clostridiales; f__Lachnospiraceae; g__; s__
New.CleanUp.ReferenceOTU48934	-0.13484	0.653422	0.600376	k__Bacteria; p__Verrucomicrobia; c__Verrucomicrobiae; o__Verrucomicrobiales; f__Verrucomicrobiaceae; g__Akkermansia; s__muciniphila
New.CleanUp.ReferenceOTU49139	-0.13484	0.653422	0.600376	k__Bacteria; p__Bacteroidetes; c__Bacteroidia; o__Bacteroidales; f__Porphyromonadaceae; g__Parabacteroides; s__
New.CleanUp.ReferenceOTU44751	-0.13325	0.694825	0.635532	k__Bacteria; p__Firmicutes; c__Bacilli; o__Lactobacillales; f__Lactobacillaceae; g__Lactobacillus; s__
New.CleanUp.ReferenceOTU75701	-0.13325	0.694825	0.635532	k__Bacteria; p__Firmicutes; c__Clostridia; o__Clostridiales; f__; g__; s__
175213	-0.129272	0.698416	0.637088	k__Bacteria; p__Firmicutes; c__Clostridia; o__Clostridiales; f__; g__; s__
New.CleanUp.ReferenceOTU24156	-0.129272	0.698416	0.637088	k__Bacteria; p__Firmicutes; c__Clostridia; o__Clostridiales; f__; g__; s__
New.CleanUp.ReferenceOTU67530	-0.12563	0.70529	0.640843	k__Bacteria; p__Firmicutes; c__Clostridia; o__Clostridiales; f__Ruminococcaceae; g__Oscillospira; s__
347714	-0.122279	0.710134	0.640843	k__Bacteria; p__Firmicutes; c__Clostridia; o__Clostridiales; f__Peptostreptococcaceae; g__; s__
171396	-0.122279	0.710134	0.640843	k__Bacteria; p__Firmicutes; c__Clostridia; o__Clostridiales; f__Ruminococcaceae; g__; s__
272788	-0.122279	0.708528	0.640843	k__Bacteria; p__Firmicutes; c__Clostridia; o__Clostridiales; f__Ruminococcaceae; g__; s__
New.CleanUp.ReferenceOTU15511	-0.122279	0.708528	0.640843	k__Bacteria; p__Firmicutes; c__Clostridia; o__Clostridiales; f__Lachnospiraceae; g__; s__
New.CleanUp.ReferenceOTU52981	-0.122279	0.710134	0.640843	k__Bacteria; p__Firmicutes; c__Clostridia; o__Clostridiales; f__; g__; s__
New.CleanUp.ReferenceOTU32769	-0.120605	0.753298	0.667309	k__Bacteria; p__Bacteroidetes; c__Bacteroidia; o__Bacteroidales; f__Porphyromonadaceae; g__Parabacteroides; s__
New.ReferenceOTU53	-0.119183	0.713217	0.640846	k__Bacteria; p__Firmicutes; c__Clostridia; o__Clostridiales; f__Ruminococcaceae
New.CleanUp.ReferenceOTU28611	-0.119183	0.713217	0.640846	k__Bacteria; p__Bacteroidetes; c__Bacteroidia; o__Bacteroidales; f__S24-7; g__; s__
462764	-0.116311	0.715454	0.640846	k__Bacteria; p__Firmicutes; c__Clostridia; o__Clostridiales; f__Ruminococcaceae; g__Ruminococcus; s__
183675	-0.116311	0.716204	0.640846	k__Bacteria; p__Firmicutes; c__Clostridia; o__Clostridiales; f__Ruminococcaceae; g__Oscillospira; s__
New.ReferenceOTU93	-0.116311	0.716204	0.640846	k__Bacteria; p__Firmicutes; c__Clostridia; o__Clostridiales
New.CleanUp.ReferenceOTU17800	-0.116052	0.754969	0.667309	k__Bacteria; p__Firmicutes; c__Clostridia; o__Clostridiales; f__; g__; s__
New.CleanUp.ReferenceOTU20204	-0.116052	0.754969	0.667309	k__Bacteria; p__Firmicutes; c__Clostridia; o__Clostridiales; f__Ruminococcaceae; g__Oscillospira; s__
724472	-0.113636	0.718372	0.640846	k__Bacteria; p__Firmicutes; c__Clostridia; o__Clostridiales; f__Lachnospiraceae; g__Dorea; s__
445144	-0.113636	0.718372	0.640846	k__Bacteria; p__Bacteroidetes; c__Bacteroidia; o__Bacteroidales; f__S24-7; g__; s__
New.CleanUp.ReferenceOTU16226	-0.113636	0.718372	0.640846	k__Bacteria; p__Verrucomicrobia; c__Verrucomicrobiae; o__Verrucomicrobiales; f__Verrucomicrobiaceae; g__Akkermansia; s__muciniphila
New.CleanUp.ReferenceOTU21445	-0.113636	0.718372	0.640846	k__Bacteria; p__Firmicutes; c__Clostridia; o__Clostridiales; f__Ruminococcaceae; g__; s__
New.CleanUp.ReferenceOTU79025	-0.113636	0.718372	0.640846	k__Bacteria; p__Firmicutes; c__Clostridia; o__Clostridiales; f__Peptostreptococcaceae; g__; s__
New.CleanUp.ReferenceOTU29004	-0.111979	0.76305	0.667309	k__Bacteria; p__Firmicutes; c__Clostridia; o__Clostridiales; f__Lachnospiraceae
New.CleanUp.ReferenceOTU45637	-0.108306	0.767512	0.667309	k__Bacteria; p__Verrucomicrobia; c__Verrucomicrobiae; o__Verrucomicrobiales; f__Verrucomicrobiaceae; g__Akkermansia; s__muciniphila
351062	-0.104973	0.770335	0.667309	k__Bacteria; p__Firmicutes; c__Clostridia; o__Clostridiales; f__Lachnospiraceae; g__; s__
New.CleanUp.ReferenceOTU17973	-0.104973	0.770335	0.667309	k__Bacteria; p__Bacteroidetes; c__Bacteroidia; o__Bacteroidales; f__S24-7; g__; s__
New.CleanUp.ReferenceOTU22797	-0.104973	0.771731	0.667309	k__Bacteria; p__Bacteroidetes; c__Bacteroidia; o__Bacteroidales; f__Porphyromonadaceae; g__Parabacteroides; s__
New.CleanUp.ReferenceOTU32611	-0.104973	0.770335	0.667309	k__Bacteria; p__Firmicutes; c__Clostridia; o__Clostridiales; f__; g__; s__
New.CleanUp.ReferenceOTU69438	-0.104973	0.771731	0.667309	k__Bacteria; p__Bacteroidetes; c__Bacteroidia; o__Bacteroidales; f__Porphyromonadaceae; g__Parabacteroides; s__
New.CleanUp.ReferenceOTU78282	-0.104973	0.773102	0.667309	k__Bacteria; p__Firmicutes; c__Clostridia; o__Clostridiales; f__Ruminococcaceae; g__Ruminococcus; s__
New.CleanUp.ReferenceOTU84372	-0.104973	0.770335	0.667309	k__Bacteria; p__Firmicutes; c__Clostridia; o__Clostridiales; f__Lachnospiraceae; g__; s__
New.CleanUp.ReferenceOTU21355	-0.101929	0.775728	0.667309	k__Bacteria; p__Firmicutes; c__Clostridia; o__Clostridiales; f__Ruminococcaceae; g__; s__
New.CleanUp.ReferenceOTU68471	-0.101929	0.775728	0.667309	Unassigned
New.CleanUp.ReferenceOTU72984	-0.101929	0.772374	0.667309	Unassigned
New.CleanUp.ReferenceOTU17602	-0.0991363	0.778265	0.667309	k__Bacteria; p__Firmicutes; c__Bacilli; o__Lactobacillales; f__Lactobacillaceae; g__Lactobacillus; s__
271185	-0.0965609	0.780102	0.667309	k__Bacteria; p__Firmicutes; c__Bacilli; o__Lactobacillales; f__Lactobacillaceae; g__Lactobacillus; s__
New.CleanUp.ReferenceOTU16231	-0.0941763	0.783683	0.667309	k__Bacteria; p__Firmicutes; c__Clostridia; o__Clostridiales; f__Lachnospiraceae
New.CleanUp.ReferenceOTU71505	-0.0941763	0.784269	0.667309	k__Bacteria; p__Firmicutes; c__Clostridia; o__Clostridiales; f__Ruminococcaceae; g__Oscillospira; s__
New.ReferenceOTU244	-0.0919601	0.785962	0.667309	k__Bacteria; p__Verrucomicrobia; c__Verrucomicrobiae; o__Verrucomicrobiales; f__Verrucomicrobiaceae; g__Akkermansia; s__muciniphila
New.CleanUp.ReferenceOTU20746	-0.0919601	0.785962	0.667309	k__Bacteria; p__Firmicutes; c__Clostridia; o__Clostridiales; f__; g__; s__
New.CleanUp.ReferenceOTU29631	-0.0909091	0.786794	0.667309	k__Bacteria; p__Bacteroidetes; c__Bacteroidia; o__Bacteroidales; f__Porphyromonadaceae; g__Parabacteroides; s__
173965	-0.0898933	0.787616	0.667309	k__Bacteria; p__Actinobacteria; c__Coriobacteriia; o__Coriobacteriales; f__Coriobacteriaceae; g__Adlercreutzia; s__
180555	-0.0898933	0.787616	0.667309	k__Bacteria; p__Firmicutes; c__Clostridia; o__Clostridiales; f__Lachnospiraceae; g__Coprococcus; s__
134065	-0.0898933	0.787616	0.667309	k__Bacteria; p__Firmicutes; c__Clostridia; o__Clostridiales; f__Lachnospiraceae; g__; s__
263933	-0.0898933	0.787616	0.667309	k__Bacteria; p__Firmicutes; c__Clostridia; o__Clostridiales; f__Lachnospiraceae; g__; s__
4390754	-0.0898933	0.787616	0.667309	k__Bacteria; p__Firmicutes; c__Clostridia; o__Clostridiales; f__Lachnospiraceae; g__Ruminococcus; s__gnavus
178331	-0.0898933	0.787616	0.667309	k__Bacteria; p__Verrucomicrobia; c__Verrucomicrobiae; o__Verrucomicrobiales; f__Verrucomicrobiaceae; g__Akkermansia; s__muciniphila
336632	-0.0898933	0.787616	0.667309	k__Bacteria; p__Verrucomicrobia; c__Verrucomicrobiae; o__Verrucomicrobiales; f__Verrucomicrobiaceae; g__Akkermansia; s__muciniphila
4476330	-0.0898933	0.787616	0.667309	k__Bacteria; p__Firmicutes; c__Clostridia; o__Clostridiales; f__Lachnospiraceae; g__Coprococcus; s__
New.CleanUp.ReferenceOTU66527	-0.0870388	0.83518	0.694043	k__Bacteria; p__Firmicutes; c__Clostridia; o__Clostridiales; f__Ruminococcaceae; g__Oscillospira; s__
New.CleanUp.ReferenceOTU51251	-0.0839839	0.84071	0.694043	k__Bacteria; p__Bacteroidetes; c__Bacteroidia; o__Bacteroidales; f__Porphyromonadaceae; g__Parabacteroides; s__
New.CleanUp.ReferenceOTU53680	-0.0839839	0.84071	0.694043	k__Bacteria; p__Bacteroidetes; c__Bacteroidia; o__Bacteroidales; f__Porphyromonadaceae; g__Parabacteroides; s__
New.CleanUp.ReferenceOTU66866	-0.0839839	0.84071	0.694043	k__Bacteria; p__Firmicutes; c__Clostridia; o__Clostridiales; f__Ruminococcaceae; g__Oscillospira; s__
164664	-0.0799503	0.844486	0.694043	k__Bacteria; p__Firmicutes; c__Bacilli; o__Lactobacillales; f__Lactobacillaceae; g__Lactobacillus; s__
New.CleanUp.ReferenceOTU66197	-0.0799503	0.844486	0.694043	k__Bacteria; p__Firmicutes; c__Clostridia; o__Clostridiales; f__Lachnospiraceae; g__Coprococcus; s__
New.CleanUp.ReferenceOTU62050	-0.0787296	0.845687	0.694043	k__Bacteria; p__Bacteroidetes; c__Bacteroidia; o__Bacteroidales; f__Porphyromonadaceae; g__Parabacteroides; s__
New.ReferenceOTU125	-0.0775632	0.846387	0.694043	k__Bacteria; p__Firmicutes; c__Clostridia; o__Clostridiales; f__; g__; s__
New.CleanUp.ReferenceOTU7636	-0.0775632	0.846387	0.694043	k__Bacteria; p__Firmicutes; c__Clostridia; o__Clostridiales; f__; g__; s__
New.CleanUp.ReferenceOTU11092	-0.0775632	0.846387	0.694043	Unassigned
New.CleanUp.ReferenceOTU35394	-0.0775632	0.846387	0.694043	k__Bacteria; p__Bacteroidetes; c__Bacteroidia; o__Bacteroidales; f__Porphyromonadaceae; g__Parabacteroides; s__
New.CleanUp.ReferenceOTU66532	-0.0775632	0.846387	0.694043	k__Bacteria; p__Verrucomicrobia; c__Verrucomicrobiae; o__Verrucomicrobiales; f__Verrucomicrobiaceae; g__Akkermansia; s__muciniphila
New.CleanUp.ReferenceOTU1998	-0.0764471	0.849367	0.694043	k__Bacteria; p__Firmicutes; c__Clostridia; o__Clostridiales; f__Ruminococcaceae; g__Oscillospira; s__
186602	-0.0753778	0.850458	0.694043	k__Bacteria; p__Firmicutes; c__Clostridia; o__Clostridiales; f__; g__; s__
New.CleanUp.ReferenceOTU40969	-0.0753778	0.850019	0.694043	k__Bacteria; p__Verrucomicrobia; c__Verrucomicrobiae; o__Verrucomicrobiales; f__Verrucomicrobiaceae; g__Akkermansia; s__muciniphila
New.CleanUp.ReferenceOTU77204	-0.0753778	0.850019	0.694043	Unassigned
New.CleanUp.ReferenceOTU80590	-0.0753778	0.850458	0.694043	k__Bacteria; p__Firmicutes; c__Clostridia; o__Clostridiales; f__Ruminococcaceae; g__Oscillospira; s__
New.CleanUp.ReferenceOTU33064	-0.0743522	0.851096	0.694043	k__Bacteria; p__Firmicutes; c__Clostridia; o__Clostridiales; f__; g__; s__
334697	-0.0733674	0.851726	0.694043	k__Bacteria; p__Firmicutes; c__Clostridia; o__Clostridiales; f__; g__; s__
New.CleanUp.ReferenceOTU47425	-0.0733674	0.851726	0.694043	k__Bacteria; p__Firmicutes; c__Clostridia; o__Clostridiales; f__Ruminococcaceae; g__Oscillospira; s__
New.CleanUp.ReferenceOTU63227	-0.0733674	0.852572	0.694043	k__Bacteria; p__Bacteroidetes; c__Bacteroidia; o__Bacteroidales; f__Porphyromonadaceae; g__Parabacteroides; s__
New.CleanUp.ReferenceOTU66738	-0.0733674	0.852572	0.694043	k__Bacteria; p__Firmicutes; c__Clostridia; o__Clostridiales; f__; g__; s__
New.CleanUp.ReferenceOTU15182	-0.0715097	0.854195	0.694043	k__Bacteria; p__Bacteroidetes; c__Bacteroidia; o__Bacteroidales; f__Porphyromonadaceae; g__Parabacteroides; s__
New.CleanUp.ReferenceOTU38083	-0.0715097	0.854195	0.694043	k__Bacteria; p__Firmicutes; c__Clostridia; o__Clostridiales; f__Ruminococcaceae
New.CleanUp.ReferenceOTU70780	-0.0715097	0.854195	0.694043	k__Bacteria; p__Firmicutes; c__Clostridia; o__Clostridiales; f__; g__; s__
New.CleanUp.ReferenceOTU82680	-0.0715097	0.854195	0.694043	Unassigned
259922	-0.0706322	0.854786	0.694043	k__Bacteria; p__Firmicutes; c__Clostridia; o__Clostridiales; f__Ruminococcaceae; g__Ruminococcus; s__
174337	-0.0706322	0.854786	0.694043	k__Bacteria; p__Verrucomicrobia; c__Verrucomicrobiae; o__Verrucomicrobiales; f__Verrucomicrobiaceae; g__Akkermansia; s__muciniphila
188920	-0.0706322	0.854786	0.694043	k__Bacteria; p__Firmicutes; c__Clostridia; o__Clostridiales; f__Lachnospiraceae; g__; s__
259195	-0.0697863	0.855765	0.694043	k__Bacteria; p__Firmicutes; c__Clostridia; o__Clostridiales; f__Ruminococcaceae; g__Ruminococcus; s__
359376	-0.0697863	0.855765	0.694043	k__Bacteria; p__Verrucomicrobia; c__Verrucomicrobiae; o__Verrucomicrobiales; f__Verrucomicrobiaceae; g__Akkermansia; s__muciniphila
New.ReferenceOTU159	-0.0697863	0.85537	0.694043	k__Bacteria; p__Bacteroidetes; c__Bacteroidia; o__Bacteroidales; f__Porphyromonadaceae; g__Parabacteroides; s__
New.CleanUp.ReferenceOTU13317	-0.0697863	0.855765	0.694043	Unassigned
193829	-0.0681818	0.856903	0.694043	k__Bacteria; p__Verrucomicrobia; c__Verrucomicrobiae; o__Verrucomicrobiales; f__Verrucomicrobiaceae; g__Akkermansia; s__muciniphila
4407703	-0.0681818	0.856903	0.694043	k__Bacteria; p__Firmicutes; c__Erysipelotrichi; o__Erysipelotrichales; f__Erysipelotrichaceae; g__Coprobacillus; s__
179703	-0.0681818	0.856903	0.694043	k__Bacteria; p__Firmicutes; c__Clostridia; o__Clostridiales; f__; g__; s__
258899	-0.0681818	0.856903	0.694043	k__Bacteria; p__Firmicutes; c__Clostridia; o__Clostridiales; f__Ruminococcaceae; g__; s__
42664	-0.0681818	0.856903	0.694043	k__Bacteria; p__Proteobacteria; c__Gammaproteobacteria; o__Oceanospirillales; f__Halomonadaceae; g__Halomonas; s__campisalis
New.ReferenceOTU71	-0.0681818	0.856903	0.694043	k__Bacteria; p__Bacteroidetes; c__Bacteroidia; o__Bacteroidales; f__Porphyromonadaceae; g__Parabacteroides; s__
New.ReferenceOTU117	-0.0681818	0.856903	0.694043	k__Bacteria; p__Firmicutes; c__Clostridia; o__Clostridiales; f__Ruminococcaceae; g__; s__
New.ReferenceOTU146	-0.0681818	0.856903	0.694043	k__Bacteria; p__Firmicutes; c__Clostridia; o__Clostridiales; f__Ruminococcaceae; g__Oscillospira; s__
New.CleanUp.ReferenceOTU35173	-0.0681818	0.856903	0.694043	k__Bacteria; p__Bacteroidetes; c__Bacteroidia; o__Bacteroidales; f__Porphyromonadaceae; g__Parabacteroides; s__
267175	-0.0603023	0.916563	0.723599	k__Bacteria; p__Firmicutes; c__Clostridia; o__Clostridiales; f__Lachnospiraceae; g__; s__
New.CleanUp.ReferenceOTU40958	-0.0603023	0.916563	0.723599	k__Bacteria; p__Bacteroidetes; c__Bacteroidia; o__Bacteroidales; f__S24-7; g__; s__
New.ReferenceOTU149	-0.0580259	0.917144	0.723599	Unassigned
95502	-0.0559893	0.919953	0.723599	k__Bacteria; p__Firmicutes; c__Clostridia; o__Clostridiales; f__Ruminococcaceae; g__Oscillospira; s__
305127	-0.0559893	0.919953	0.723599	k__Bacteria; p__Firmicutes; c__Clostridia; o__Clostridiales; f__Dehalobacteriaceae; g__Dehalobacterium; s__
New.CleanUp.ReferenceOTU37196	-0.0559893	0.919953	0.723599	k__Bacteria; p__Bacteroidetes; c__Bacteroidia; o__Bacteroidales; f__S24-7; g__; s__
New.CleanUp.ReferenceOTU84301	-0.0559893	0.919953	0.723599	k__Bacteria; p__Firmicutes; c__Bacilli; o__Lactobacillales; f__Lactobacillaceae; g__Lactobacillus; s__
4308591	-0.054153	0.921501	0.723599	k__Bacteria; p__Bacteroidetes; c__Bacteroidia; o__Bacteroidales; f__Porphyromonadaceae; g__Parabacteroides; s__
New.CleanUp.ReferenceOTU6160	-0.0524864	0.922478	0.723599	k__Bacteria; p__Firmicutes; c__Clostridia; o__Clostridiales; f__; g__; s__
New.CleanUp.ReferenceOTU32160	-0.0524864	0.923436	0.723599	k__Bacteria; p__Firmicutes; c__Clostridia; o__Clostridiales; f__Ruminococcaceae; g__Oscillospira; s__
New.CleanUp.ReferenceOTU5602	-0.0509647	0.924344	0.723599	k__Bacteria; p__Firmicutes; c__Clostridia; o__Clostridiales; f__Ruminococcaceae; g__; s__
New.CleanUp.ReferenceOTU61512	-0.0509647	0.924344	0.723599	k__Bacteria; p__Firmicutes; c__Clostridia; o__Clostridiales; f__Ruminococcaceae
1110253	-0.0502519	0.924674	0.723599	k__Bacteria; p__Firmicutes; c__Clostridia; o__Clostridiales; f__Ruminococcaceae; g__; s__
New.CleanUp.ReferenceOTU61715	-0.0502519	0.924674	0.723599	k__Bacteria; p__Verrucomicrobia; c__Verrucomicrobiae; o__Verrucomicrobiales; f__Verrucomicrobiaceae; g__Akkermansia; s__muciniphila
New.CleanUp.ReferenceOTU68422	-0.0502519	0.924674	0.723599	k__Bacteria; p__Firmicutes; c__Clostridia; o__Clostridiales; f__Lachnospiraceae; g__; s__
New.CleanUp.ReferenceOTU2203	-0.0495682	0.92522	0.723599	k__Bacteria; p__Bacteroidetes; c__Bacteroidia; o__Bacteroidales; f__Porphyromonadaceae; g__Parabacteroides; s__
343923	-0.0482805	0.926278	0.723599	k__Bacteria; p__Firmicutes; c__Clostridia; o__Clostridiales; f__; g__; s__
297143	-0.0476731	0.92679	0.723599	k__Bacteria; p__Firmicutes; c__Clostridia; o__Clostridiales; f__Peptostreptococcaceae; g__; s__
New.ReferenceOTU32	-0.0476731	0.92679	0.723599	k__Bacteria; p__Firmicutes; c__Clostridia; o__Clostridiales; f__Ruminococcaceae; g__Oscillospira; s__
260741	-0.0470882	0.927089	0.723599	k__Bacteria; p__Firmicutes; c__Clostridia; o__Clostridiales; f__Ruminococcaceae; g__Oscillospira; s__
259495	-0.0470882	0.927089	0.723599	k__Bacteria; p__Firmicutes; c__Clostridia; o__Clostridiales; f__; g__; s__
New.CleanUp.ReferenceOTU8088	-0.0470882	0.927089	0.723599	k__Bacteria; p__Firmicutes; c__Bacilli; o__Lactobacillales; f__Lactobacillaceae; g__Lactobacillus; s__
New.CleanUp.ReferenceOTU27476	-0.0470882	0.927291	0.723599	k__Bacteria; p__Firmicutes; c__Clostridia; o__Clostridiales; f__Ruminococcaceae; g__Oscillospira; s__
261315	-0.04598	0.927875	0.723599	k__Bacteria; p__Firmicutes; c__Clostridia; o__Clostridiales; f__; g__; s__
177271	-0.0449467	0.928444	0.723599	k__Bacteria; p__Firmicutes; c__Clostridia; o__Clostridiales; f__Ruminococcaceae; g__Ruminococcus; s__
181419	-0.0449467	0.928444	0.723599	k__Bacteria; p__Firmicutes; c__Clostridia; o__Clostridiales; f__; g__; s__
716984	-0.0449467	0.928444	0.723599	k__Bacteria; p__Firmicutes; c__Clostridia; o__Clostridiales; f__Ruminococcaceae; g__Ruminococcus; s__
New.ReferenceOTU226	-0.0449467	0.928444	0.723599	k__Bacteria; p__Verrucomicrobia; c__Verrucomicrobiae; o__Verrucomicrobiales; f__Verrucomicrobiaceae; g__Akkermansia; s__muciniphila
New.CleanUp.ReferenceOTU5844	-0.0301511	1	0.74057	k__Bacteria; p__Bacteroidetes; c__Bacteroidia; o__Bacteroidales; f__Porphyromonadaceae; g__Parabacteroides; s__
New.CleanUp.ReferenceOTU78019	-0.0279946	1	0.74057	k__Bacteria; p__Bacteroidetes; c__Bacteroidia; o__Bacteroidales; f__Porphyromonadaceae; g__Parabacteroides; s__
4380137	-0.0266501	1	0.74057	k__Bacteria; p__Firmicutes; c__Clostridia; o__Clostridiales; f__Peptostreptococcaceae; g__; s__
178304	-0.0266501	1	0.74057	k__Bacteria; p__Firmicutes; c__Clostridia; o__Clostridiales; f__Lachnospiraceae; g__; s__
New.CleanUp.ReferenceOTU22972	-0.0266501	1	0.74057	k__Bacteria; p__Firmicutes; c__Clostridia; o__Clostridiales; f__; g__; s__
New.CleanUp.ReferenceOTU58925	-0.0266501	1	0.74057	k__Bacteria; p__Firmicutes; c__Clostridia; o__Clostridiales; f__Ruminococcaceae; g__Ruminococcus; s__
New.CleanUp.ReferenceOTU60267	-0.0266501	1	0.74057	k__Bacteria; p__Bacteroidetes; c__Bacteroidia; o__Bacteroidales; f__S24-7; g__; s__
New.CleanUp.ReferenceOTU69729	-0.0266501	1	0.74057	k__Bacteria; p__Bacteroidetes; c__Bacteroidia; o__Bacteroidales; f__S24-7; g__; s__
New.CleanUp.ReferenceOTU71260	-0.0266501	1	0.74057	k__Bacteria; p__Firmicutes; c__Clostridia; o__Clostridiales; f__; g__; s__
New.CleanUp.ReferenceOTU59944	-0.0262432	1	0.74057	k__Bacteria; p__Bacteroidetes; c__Bacteroidia; o__Bacteroidales; f__Porphyromonadaceae; g__Parabacteroides; s__
New.CleanUp.ReferenceOTU190	-0.0251259	1	0.74057	k__Bacteria; p__Firmicutes; c__Clostridia; o__Clostridiales; f__; g__; s__
New.CleanUp.ReferenceOTU8944	-0.0251259	1	0.74057	k__Bacteria; p__Firmicutes; c__Clostridia; o__Clostridiales; f__Ruminococcaceae; g__Ruminococcus; s__
New.CleanUp.ReferenceOTU33884	-0.0251259	1	0.74057	k__Bacteria; p__Firmicutes; c__Clostridia; o__Clostridiales; f__; g__; s__
New.CleanUp.ReferenceOTU24024	-0.0247841	1	0.74057	k__Bacteria; p__Firmicutes; c__Clostridia; o__Clostridiales; f__Lachnospiraceae; g__; s__
272701	-0.0244558	1	0.74057	k__Bacteria; p__Firmicutes; c__Clostridia; o__Clostridiales; f__; g__; s__
186555	-0.0244558	1	0.74057	k__Bacteria; p__Firmicutes; c__Clostridia; o__Clostridiales; f__; g__; s__
New.ReferenceOTU148	-0.0244558	1	0.74057	k__Bacteria; p__Bacteroidetes; c__Bacteroidia; o__Bacteroidales; f__Porphyromonadaceae; g__Parabacteroides; s__
New.CleanUp.ReferenceOTU11300	-0.0244558	1	0.74057	k__Bacteria; p__Firmicutes; c__Clostridia; o__Clostridiales; f__Ruminococcaceae; g__Oscillospira; s__
New.CleanUp.ReferenceOTU13456	-0.0244558	1	0.74057	k__Bacteria; p__Firmicutes; c__Clostridia; o__Clostridiales; f__; g__; s__
New.CleanUp.ReferenceOTU21818	-0.0244558	1	0.74057	k__Bacteria; p__Bacteroidetes; c__Bacteroidia; o__Bacteroidales; f__S24-7; g__; s__
New.CleanUp.ReferenceOTU67873	-0.0244558	1	0.74057	k__Bacteria; p__Firmicutes; c__Clostridia; o__Clostridiales
New.CleanUp.ReferenceOTU39958	-0.0238366	1	0.74057	k__Bacteria; p__Firmicutes; c__Clostridia; o__Clostridiales; f__Ruminococcaceae; g__; s__
New.ReferenceOTU98	-0.0235441	1	0.74057	k__Bacteria; p__Firmicutes; c__Clostridia; o__Clostridiales; f__; g__; s__
191583	-0.0232621	1	0.74057	k__Bacteria; p__Firmicutes; c__Clostridia; o__Clostridiales; f__Lachnospiraceae; g__Ruminococcus; s__gnavus
185177	-0.0232621	1	0.74057	k__Bacteria; p__Firmicutes; c__Clostridia; o__Clostridiales; f__; g__; s__
New.CleanUp.ReferenceOTU65798	-0.0232621	1	0.74057	k__Bacteria; p__Firmicutes; c__Clostridia; o__Clostridiales; f__Ruminococcaceae; g__; s__
180879	-0.0227273	1	0.74057	k__Bacteria; p__Firmicutes; c__Clostridia; o__Clostridiales; f__Ruminococcaceae; g__Oscillospira; s__
174667	-0.0227273	1	0.74057	k__Bacteria; p__Firmicutes; c__Clostridia; o__Clostridiales; f__Lachnospiraceae; g__; s__
4306262	0	1	0.74057	k__Bacteria; p__Verrucomicrobia; c__Verrucomicrobiae; o__Verrucomicrobiales; f__Verrucomicrobiaceae; g__Akkermansia; s__muciniphila
3392847	0	1	0.74057	k__Bacteria; p__Firmicutes; c__Clostridia; o__Clostridiales; f__Lachnospiraceae; g__; s__
238487	0	1	0.74057	k__Bacteria; p__Firmicutes; c__Clostridia; o__Clostridiales; f__Ruminococcaceae; g__Ruminococcus; s__
180535	0	1	0.74057	k__Bacteria; p__Firmicutes; c__Clostridia; o__Clostridiales; f__; g__; s__
1033413	0	1	0.74057	k__Bacteria; p__Firmicutes; c__Bacilli; o__Lactobacillales; f__Enterococcaceae; g__Enterococcus; s__
816702	0	1	0.74057	k__Bacteria; p__Proteobacteria; c__Gammaproteobacteria; o__Enterobacteriales; f__Enterobacteriaceae; g__; s__
337762	0	1	0.74057	k__Bacteria; p__Firmicutes; c__Clostridia; o__Clostridiales; f__Ruminococcaceae; g__Ruminococcus; s__
185587	0	1	0.74057	k__Bacteria; p__Firmicutes; c__Clostridia; o__Clostridiales; f__Lachnospiraceae; g__; s__
267717	0	1	0.74057	k__Bacteria; p__Firmicutes; c__Clostridia; o__Clostridiales; f__Lachnospiraceae; g__Ruminococcus; s__gnavus
New.ReferenceOTU57	0	1	0.74057	k__Bacteria; p__Verrucomicrobia; c__Verrucomicrobiae; o__Verrucomicrobiales; f__Verrucomicrobiaceae; g__Akkermansia; s__muciniphila
New.CleanUp.ReferenceOTU3158	0	1	0.74057	k__Bacteria; p__Firmicutes; c__Clostridia; o__Clostridiales; f__Ruminococcaceae; g__Oscillospira; s__
New.CleanUp.ReferenceOTU11261	0	1	0.74057	k__Bacteria; p__Actinobacteria; c__Coriobacteriia; o__Coriobacteriales; f__Coriobacteriaceae; g__Adlercreutzia; s__
New.CleanUp.ReferenceOTU18587	0	1	0.74057	k__Bacteria; p__Firmicutes; c__Clostridia; o__Clostridiales; f__Ruminococcaceae; g__; s__
New.CleanUp.ReferenceOTU21037	0	1	0.74057	k__Bacteria; p__Verrucomicrobia; c__Verrucomicrobiae; o__Verrucomicrobiales; f__Verrucomicrobiaceae; g__Akkermansia; s__muciniphila
New.CleanUp.ReferenceOTU23861	0	1	0.74057	k__Bacteria; p__Verrucomicrobia; c__Verrucomicrobiae; o__Verrucomicrobiales; f__Verrucomicrobiaceae; g__Akkermansia; s__muciniphila
New.CleanUp.ReferenceOTU25403	0	1	0.74057	Unassigned
New.CleanUp.ReferenceOTU31912	0	1	0.74057	k__Bacteria; p__Firmicutes; c__Clostridia; o__Clostridiales; f__Lachnospiraceae; g__; s__
New.CleanUp.ReferenceOTU57914	0	1	0.74057	k__Bacteria; p__Firmicutes; c__Clostridia; o__Clostridiales; f__Ruminococcaceae; g__Oscillospira; s__
New.CleanUp.ReferenceOTU60888	0	1	0.74057	k__Bacteria; p__Bacteroidetes; c__Bacteroidia; o__Bacteroidales; f__Porphyromonadaceae; g__Parabacteroides; s__
New.CleanUp.ReferenceOTU72657	0	1	0.74057	k__Bacteria; p__Bacteroidetes; c__Bacteroidia; o__Bacteroidales; f__S24-7; g__; s__
New.CleanUp.ReferenceOTU73942	0	1	0.74057	k__Bacteria; p__Bacteroidetes; c__Bacteroidia; o__Bacteroidales; f__Porphyromonadaceae; g__Parabacteroides; s__
New.ReferenceOTU209	0.0227273	1	0.74057	k__Bacteria; p__Verrucomicrobia; c__Verrucomicrobiae; o__Verrucomicrobiales; f__Verrucomicrobiaceae; g__Akkermansia; s__muciniphila
266935	0.0232621	1	0.74057	k__Bacteria; p__Firmicutes; c__Clostridia; o__Clostridiales; f__; g__; s__
2797559	0.0244558	1	0.74057	k__Bacteria; p__Firmicutes; c__Clostridia; o__Clostridiales; f__Lachnospiraceae; g__Ruminococcus; s__gnavus
New.ReferenceOTU200	0.0244558	1	0.74057	k__Bacteria; p__Firmicutes; c__Clostridia; o__Clostridiales; f__; g__; s__
New.ReferenceOTU233	0.0244558	1	0.74057	k__Bacteria; p__Firmicutes; c__Bacilli; o__Lactobacillales; f__Lactobacillaceae; g__Lactobacillus; s__
New.CleanUp.ReferenceOTU13327	0.0244558	1	0.74057	k__Bacteria; p__Verrucomicrobia; c__Verrucomicrobiae; o__Verrucomicrobiales; f__Verrucomicrobiaceae; g__Akkermansia; s__muciniphila
New.CleanUp.ReferenceOTU79696	0.0251259	1	0.74057	k__Bacteria; p__Firmicutes; c__Clostridia; o__Clostridiales; f__; g__; s__
New.CleanUp.ReferenceOTU6713	0.0254824	1	0.74057	k__Bacteria; p__Bacteroidetes; c__Bacteroidia; o__Bacteroidales; f__Porphyromonadaceae; g__Parabacteroides; s__
New.CleanUp.ReferenceOTU52786	0.0254824	1	0.74057	k__Bacteria; p__Verrucomicrobia; c__Verrucomicrobiae; o__Verrucomicrobiales; f__Verrucomicrobiaceae; g__Akkermansia; s__muciniphila
176925	0.0258544	1	0.74057	k__Bacteria; p__Firmicutes; c__Clostridia; o__Clostridiales; f__; g__; s__
New.CleanUp.ReferenceOTU60087	0.0258544	1	0.74057	Unassigned
New.CleanUp.ReferenceOTU64773	0.0258544	1	0.74057	Unassigned
268725	0.0266501	1	0.74057	k__Bacteria; p__Firmicutes; c__Clostridia; o__Clostridiales; f__Ruminococcaceae; g__Oscillospira; s__
New.CleanUp.ReferenceOTU13616	0.0266501	1	0.74057	k__Bacteria; p__Firmicutes; c__Clostridia; o__Clostridiales; f__; g__; s__
New.CleanUp.ReferenceOTU26321	0.0266501	1	0.74057	k__Bacteria; p__Bacteroidetes; c__Bacteroidia; o__Bacteroidales; f__Porphyromonadaceae; g__Parabacteroides; s__
New.CleanUp.ReferenceOTU53489	0.0266501	1	0.74057	k__Bacteria; p__Firmicutes; c__Clostridia; o__Clostridiales; f__Ruminococcaceae; g__Ruminococcus; s__
New.CleanUp.ReferenceOTU34247	0.0279946	1	0.74057	k__Bacteria; p__Firmicutes; c__Clostridia; o__Clostridiales; f__; g__; s__
New.CleanUp.ReferenceOTU66588	0.0279946	1	0.74057	k__Bacteria; p__Firmicutes; c__Clostridia; o__Clostridiales; f__Lachnospiraceae; g__Coprococcus; s__
New.CleanUp.ReferenceOTU72464	0.0301511	1	0.74057	k__Bacteria; p__Bacteroidetes; c__Bacteroidia; o__Bacteroidales; f__Porphyromonadaceae; g__Parabacteroides; s__
265280	0.0449467	0.928444	0.723599	k__Bacteria; p__Firmicutes; c__Clostridia; o__Clostridiales; f__Lachnospiraceae; g__; s__
272619	0.04598	0.927875	0.723599	k__Bacteria; p__Firmicutes; c__Clostridia; o__Clostridiales; f__; g__; s__
New.CleanUp.ReferenceOTU44527	0.04598	0.927875	0.723599	k__Bacteria; p__Bacteroidetes; c__Bacteroidia; o__Bacteroidales; f__Porphyromonadaceae; g__Parabacteroides; s__
New.CleanUp.ReferenceOTU64120	0.0470882	0.927089	0.723599	k__Bacteria; p__Firmicutes; c__Clostridia; o__Clostridiales; f__; g__; s__
New.CleanUp.ReferenceOTU4811	0.0476731	0.92679	0.723599	k__Bacteria; p__Verrucomicrobia; c__Verrucomicrobiae; o__Verrucomicrobiales; f__Verrucomicrobiaceae; g__Akkermansia; s__muciniphila
259557	0.0509647	0.924344	0.723599	k__Bacteria; p__Bacteroidetes; c__Bacteroidia; o__Bacteroidales; f__S24-7; g__; s__
New.CleanUp.ReferenceOTU6557	0.0509647	0.924344	0.723599	k__Bacteria; p__Firmicutes; c__Clostridia; o__Clostridiales; f__Ruminococcaceae; g__Ruminococcus; s__
New.CleanUp.ReferenceOTU39022	0.0509647	0.923184	0.723599	k__Bacteria; p__Bacteroidetes; c__Bacteroidia; o__Bacteroidales; f__Porphyromonadaceae; g__Parabacteroides; s__
New.CleanUp.ReferenceOTU76079	0.0509647	0.923184	0.723599	k__Bacteria; p__Firmicutes; c__Clostridia; o__Clostridiales; f__; g__; s__
New.CleanUp.ReferenceOTU21269	0.0524864	0.922478	0.723599	k__Bacteria; p__Firmicutes; c__Clostridia; o__Clostridiales; f__Lachnospiraceae; g__Coprococcus; s__
New.CleanUp.ReferenceOTU3771	0.054153	0.921501	0.723599	k__Bacteria; p__Bacteroidetes; c__Bacteroidia; o__Bacteroidales; f__Porphyromonadaceae; g__Parabacteroides; s__
322464	0.0559893	0.919953	0.723599	k__Bacteria; p__Firmicutes; c__Clostridia; o__Clostridiales; f__Ruminococcaceae; g__Oscillospira; s__
274422	0.0559893	0.919953	0.723599	k__Bacteria; p__Firmicutes; c__Clostridia; o__Clostridiales; f__Peptostreptococcaceae; g__; s__
New.CleanUp.ReferenceOTU725	0.0559893	0.919953	0.723599	k__Bacteria; p__Firmicutes; c__Clostridia; o__Clostridiales; f__; g__; s__
New.CleanUp.ReferenceOTU45106	0.0559893	0.919953	0.723599	k__Bacteria; p__Verrucomicrobia; c__Verrucomicrobiae; o__Verrucomicrobiales; f__Verrucomicrobiaceae; g__Akkermansia; s__muciniphila
New.CleanUp.ReferenceOTU70273	0.0559893	0.919953	0.723599	k__Bacteria; p__Firmicutes; c__Clostridia; o__Clostridiales; f__; g__; s__
New.CleanUp.ReferenceOTU70646	0.0559893	0.919953	0.723599	k__Bacteria; p__Firmicutes; c__Clostridia; o__Clostridiales; f__Ruminococcaceae; g__Oscillospira; s__
New.CleanUp.ReferenceOTU48153	0.0580259	0.917145	0.723599	k__Bacteria; p__Firmicutes; c__Clostridia; o__Clostridiales; f__Ruminococcaceae; g__; s__
New.CleanUp.ReferenceOTU7447	0.0603023	0.916563	0.723599	k__Bacteria; p__Verrucomicrobia; c__Verrucomicrobiae; o__Verrucomicrobiales; f__Verrucomicrobiaceae; g__Akkermansia; s__muciniphila
New.CleanUp.ReferenceOTU46054	0.0603023	0.916563	0.723599	k__Bacteria; p__Firmicutes; c__Clostridia; o__Clostridiales; f__Ruminococcaceae; g__; s__
273364	0.0681818	0.856903	0.694043	k__Bacteria; p__Firmicutes; c__Clostridia; o__Clostridiales; f__; g__; s__
272889	0.0681818	0.856903	0.694043	k__Bacteria; p__Firmicutes; c__Clostridia; o__Clostridiales; f__; g__; s__
341252	0.0697863	0.855765	0.694043	k__Bacteria; p__Firmicutes; c__Clostridia; o__Clostridiales; f__; g__; s__
267071	0.0697863	0.855765	0.694043	k__Bacteria; p__Firmicutes; c__Clostridia; o__Clostridiales; f__; g__; s__
320249	0.0697863	0.855765	0.694043	k__Bacteria; p__Firmicutes; c__Clostridia; o__Clostridiales; f__Ruminococcaceae; g__Oscillospira; s__
New.ReferenceOTU137	0.0697863	0.85537	0.694043	k__Bacteria; p__Verrucomicrobia; c__Verrucomicrobiae; o__Verrucomicrobiales; f__Verrucomicrobiaceae; g__Akkermansia; s__muciniphila
New.CleanUp.ReferenceOTU15391	0.0731272	0.896668	0.723599	k__Bacteria; p__Bacteroidetes; c__Bacteroidia; o__Bacteroidales; f__Porphyromonadaceae; g__Parabacteroides; s__
New.CleanUp.ReferenceOTU66923	0.0733674	0.852572	0.694043	k__Bacteria; p__Firmicutes; c__Clostridia; o__Clostridiales; f__Ruminococcaceae; g__; s__
2658058	0.0743522	0.851096	0.694043	k__Bacteria; p__Firmicutes; c__Clostridia; o__Clostridiales; f__Peptostreptococcaceae; g__; s__
New.CleanUp.ReferenceOTU77464	0.0753778	0.850458	0.694043	Unassigned
New.CleanUp.ReferenceOTU1466	0.0787296	0.845687	0.694043	k__Bacteria; p__Firmicutes; c__Clostridia; o__Clostridiales; f__; g__; s__
New.CleanUp.ReferenceOTU19509	0.0799503	0.844486	0.694043	k__Bacteria; p__Firmicutes; c__Clostridia; o__Clostridiales; f__Ruminococcaceae; g__Ruminococcus; s__
New.CleanUp.ReferenceOTU83586	0.0839839	0.84071	0.694043	k__Bacteria; p__Bacteroidetes; c__Bacteroidia; o__Bacteroidales; f__S24-7; g__; s__
167034	0.0898933	0.787616	0.667309	k__Bacteria; p__Firmicutes; c__Clostridia; o__Clostridiales; f__Ruminococcaceae; g__Oscillospira; s__
263138	0.0898933	0.787616	0.667309	k__Bacteria; p__Firmicutes; c__Clostridia; o__Clostridiales; f__Lachnospiraceae; g__Ruminococcus; s__gnavus
New.ReferenceOTU115	0.0898933	0.787616	0.667309	k__Bacteria; p__Bacteroidetes; c__Bacteroidia; o__Bacteroidales; f__Porphyromonadaceae; g__Parabacteroides; s__
New.ReferenceOTU257	0.0898933	0.787616	0.667309	k__Bacteria; p__Firmicutes; c__Clostridia; o__Clostridiales; f__; g__; s__
New.ReferenceOTU28	0.0898933	0.787616	0.667309	Unassigned
272758	0.0919601	0.785962	0.667309	k__Bacteria; p__Firmicutes; c__Clostridia; o__Clostridiales; f__; g__; s__
303184	0.0919601	0.785962	0.667309	k__Bacteria; p__Firmicutes; c__Clostridia; o__Clostridiales; f__; g__; s__
New.CleanUp.ReferenceOTU41056	0.0923186	0.823208	0.694043	k__Bacteria; p__Firmicutes; c__Clostridia; o__Clostridiales; f__Lachnospiraceae; g__Coprococcus; s__
268396	0.0941763	0.784269	0.667309	k__Bacteria; p__Firmicutes; c__Clostridia; o__Clostridiales; f__; g__; s__
New.CleanUp.ReferenceOTU77279	0.0965609	0.780102	0.667309	k__Bacteria; p__Bacteroidetes; c__Bacteroidia; o__Bacteroidales; f__S24-7; g__; s__
197765	0.0978232	0.77919	0.667309	k__Bacteria; p__Firmicutes; c__Clostridia; o__Clostridiales; f__Lachnospiraceae; g__Dorea; s__
270382	0.0991363	0.778265	0.667309	k__Bacteria; p__Firmicutes; c__Clostridia; o__Clostridiales; f__Clostridiaceae; g__; s__
New.CleanUp.ReferenceOTU48073	0.0991363	0.778265	0.667309	k__Bacteria; p__Firmicutes; c__Clostridia; o__Clostridiales; f__Lachnospiraceae; g__Coprococcus; s__
258812	0.100504	0.776685	0.667309	k__Bacteria; p__Firmicutes; c__Clostridia; o__Clostridiales; f__; g__; s__
New.CleanUp.ReferenceOTU397	0.100504	0.776685	0.667309	k__Bacteria; p__Bacteroidetes; c__Bacteroidia; o__Bacteroidales; f__Porphyromonadaceae; g__Parabacteroides; s__
New.CleanUp.ReferenceOTU77494	0.100504	0.776685	0.667309	k__Bacteria; p__Firmicutes; c__Clostridia; o__Clostridiales; f__Lachnospiraceae
3392842	0.101929	0.772374	0.667309	k__Bacteria; p__Firmicutes; c__Clostridia; o__Clostridiales; f__Lachnospiraceae; g__; s__
New.CleanUp.ReferenceOTU27561	0.101929	0.775728	0.667309	k__Bacteria; p__Firmicutes; c__Clostridia; o__Clostridiales; f__Lachnospiraceae; g__; s__
New.CleanUp.ReferenceOTU39637	0.101929	0.775728	0.667309	k__Bacteria; p__Verrucomicrobia; c__Verrucomicrobiae; o__Verrucomicrobiales; f__Verrucomicrobiaceae; g__Akkermansia; s__muciniphila
274289	0.103418	0.771361	0.667309	k__Bacteria; p__Firmicutes; c__Clostridia; o__Clostridiales; f__; g__; s__
406247	0.104973	0.770335	0.667309	k__Bacteria; p__Firmicutes; c__Clostridia; o__Clostridiales; f__; g__; s__
274374	0.104973	0.770335	0.667309	k__Bacteria; p__Firmicutes; c__Clostridia; o__Clostridiales; f__; g__; s__
New.ReferenceOTU250	0.104973	0.770335	0.667309	Unassigned
New.CleanUp.ReferenceOTU56012	0.104973	0.773102	0.667309	k__Bacteria; p__Firmicutes; c__Clostridia; o__Clostridiales; f__Ruminococcaceae; g__Oscillospira; s__
New.CleanUp.ReferenceOTU60668	0.104973	0.771731	0.667309	k__Bacteria; p__Firmicutes; c__Clostridia; o__Clostridiales; f__Ruminococcaceae; g__Ruminococcus; s__
New.CleanUp.ReferenceOTU73232	0.104973	0.770335	0.667309	k__Bacteria; p__Bacteroidetes; c__Bacteroidia; o__Bacteroidales; f__S24-7; g__; s__
New.CleanUp.ReferenceOTU21945	0.1066	0.77071	0.667309	k__Bacteria; p__Bacteroidetes; c__Bacteroidia; o__Bacteroidales; f__Porphyromonadaceae; g__Parabacteroides; s__
New.CleanUp.ReferenceOTU24615	0.108306	0.767512	0.667309	k__Bacteria; p__Verrucomicrobia; c__Verrucomicrobiae; o__Verrucomicrobiales; f__Verrucomicrobiaceae; g__Akkermansia; s__muciniphila
New.ReferenceOTU139	0.111979	0.76305	0.667309	k__Bacteria; p__Bacteroidetes; c__Bacteroidia; o__Bacteroidales; f__Porphyromonadaceae; g__Parabacteroides; s__
New.CleanUp.ReferenceOTU31704	0.111979	0.758267	0.667309	Unassigned
New.CleanUp.ReferenceOTU69069	0.111979	0.76305	0.667309	k__Bacteria; p__Firmicutes; c__Clostridia; o__Clostridiales; f__; g__; s__
New.CleanUp.ReferenceOTU15596	0.113636	0.718372	0.640846	Unassigned
New.CleanUp.ReferenceOTU9191	0.119183	0.713217	0.640846	k__Bacteria; p__Firmicutes; c__Clostridia; o__Clostridiales; f__Ruminococcaceae; g__; s__
New.CleanUp.ReferenceOTU15869	0.119183	0.713217	0.640846	k__Bacteria; p__Firmicutes; c__Clostridia; o__Clostridiales; f__; g__; s__
272092	0.120701	0.709709	0.640843	k__Bacteria; p__Firmicutes; c__Clostridia; o__Clostridiales; f__; g__; s__
272192	0.122279	0.710134	0.640843	k__Bacteria; p__Firmicutes; c__Clostridia; o__Clostridiales; f__Ruminococcaceae; g__Oscillospira; s__
268074	0.122279	0.710134	0.640843	k__Bacteria; p__Firmicutes; c__Clostridia; o__Clostridiales; f__Clostridiaceae; g__; s__
New.CleanUp.ReferenceOTU59510	0.122279	0.710134	0.640843	k__Bacteria; p__Firmicutes; c__Clostridia; o__Clostridiales; f__; g__; s__
New.CleanUp.ReferenceOTU83937	0.122279	0.708528	0.640843	k__Bacteria; p__Firmicutes; c__Clostridia; o__Clostridiales; f__Ruminococcaceae; g__Oscillospira; s__
183927	0.127412	0.704054	0.640843	k__Bacteria; p__Firmicutes; c__Clostridia; o__Clostridiales; f__Lachnospiraceae; g__; s__
New.CleanUp.ReferenceOTU68968	0.131216	0.697092	0.637029	k__Bacteria; p__Firmicutes; c__Clostridia; o__Clostridiales; f__Ruminococcaceae; g__Oscillospira; s__
4390755	0.13325	0.694825	0.635532	k__Bacteria; p__Tenericutes; c__Mollicutes; o__Anaeroplasmatales; f__Anaeroplasmataceae; g__Anaeroplasma; s__
New.CleanUp.ReferenceOTU19649	0.13325	0.694825	0.635532	k__Bacteria; p__Firmicutes; c__Clostridia; o__Clostridiales; f__Ruminococcaceae; g__; s__
349459	0.13484	0.653422	0.600376	k__Bacteria; p__Firmicutes; c__Clostridia; o__Clostridiales; f__Ruminococcaceae; g__; s__
259699	0.13484	0.653422	0.600376	k__Bacteria; p__Firmicutes; c__Clostridia; o__Clostridiales; f__Ruminococcaceae; g__; s__
New.ReferenceOTU13	0.13484	0.653422	0.600376	k__Bacteria; p__Firmicutes; c__Clostridia; o__Clostridiales; f__Clostridiaceae; g__; s__
New.ReferenceOTU87	0.13484	0.653422	0.600376	k__Bacteria; p__Verrucomicrobia; c__Verrucomicrobiae; o__Verrucomicrobiales; f__Verrucomicrobiaceae; g__Akkermansia; s__muciniphila
New.ReferenceOTU113	0.13484	0.653422	0.600376	k__Bacteria; p__Firmicutes; c__Clostridia; o__Clostridiales; f__; g__; s__
New.ReferenceOTU217	0.13484	0.653422	0.600376	k__Bacteria; p__Bacteroidetes; c__Bacteroidia; o__Bacteroidales; f__Porphyromonadaceae; g__Parabacteroides; s__
358757	0.13794	0.650839	0.600376	k__Bacteria; p__Verrucomicrobia; c__Verrucomicrobiae; o__Verrucomicrobiales; f__Verrucomicrobiaceae; g__Akkermansia; s__muciniphila
187807	0.13794	0.650839	0.600376	k__Bacteria; p__Firmicutes; c__Clostridia; o__Clostridiales; f__Ruminococcaceae; g__Oscillospira; s__
New.CleanUp.ReferenceOTU7681	0.13794	0.650839	0.600376	k__Bacteria; p__Bacteroidetes; c__Bacteroidia; o__Bacteroidales; f__Porphyromonadaceae; g__Parabacteroides; s__
258550	0.139573	0.649526	0.600376	k__Bacteria; p__Firmicutes; c__Clostridia; o__Clostridiales; f__Ruminococcaceae; g__; s__
New.CleanUp.ReferenceOTU83069	0.139973	0.687706	0.631304	k__Bacteria; p__Firmicutes; c__Clostridia; o__Clostridiales; f__Ruminococcaceae; g__; s__
827689	0.141264	0.647284	0.600376	k__Bacteria; p__Firmicutes; c__Clostridia; o__Clostridiales; f__; g__; s__
New.ReferenceOTU241	0.141264	0.647284	0.600376	k__Bacteria; p__Bacteroidetes; c__Bacteroidia; o__Bacteroidales; f__S24-7; g__; s__
New.CleanUp.ReferenceOTU16681	0.144841	0.644561	0.600376	k__Bacteria; p__Firmicutes; c__Clostridia; o__Clostridiales; f__Ruminococcaceae; g__Oscillospira; s__
New.CleanUp.ReferenceOTU47025	0.144841	0.644561	0.600376	k__Bacteria; p__Bacteroidetes; c__Bacteroidia; o__Bacteroidales; f__Porphyromonadaceae; g__Parabacteroides; s__
New.ReferenceOTU29	0.148704	0.638855	0.600376	k__Bacteria; p__Bacteroidetes; c__Bacteroidia; o__Bacteroidales; f__S24-7; g__; s__
New.CleanUp.ReferenceOTU61067	0.148704	0.638855	0.600376	k__Bacteria; p__Firmicutes; c__Clostridia; o__Clostridiales; f__Ruminococcaceae; g__Ruminococcus; s__
New.CleanUp.ReferenceOTU50475	0.150756	0.636401	0.600376	k__Bacteria; p__Firmicutes; c__Bacilli; o__Lactobacillales; f__Lactobacillaceae; g__Lactobacillus; s__
4447567	0.152894	0.634918	0.600376	k__Bacteria; p__Firmicutes; c__Bacilli; o__Lactobacillales; f__Streptococcaceae; g__; s__
4312974	0.152894	0.634918	0.600376	k__Bacteria; p__Firmicutes; c__Bacilli; o__Bacillales; f__Staphylococcaceae; g__Staphylococcus; s__succinus
New.CleanUp.ReferenceOTU10343	0.157459	0.630849	0.600376	k__Bacteria; p__Firmicutes; c__Clostridia; o__Clostridiales; f__; g__; s__
278440	0.159091	0.58854	0.575245	k__Bacteria; p__Firmicutes; c__Clostridia; o__Clostridiales; f__; g__; s__
277588	0.159091	0.58854	0.575245	k__Bacteria; p__Firmicutes; c__Clostridia; o__Clostridiales; f__Ruminococcaceae; g__Oscillospira; s__
New.CleanUp.ReferenceOTU4718	0.159091	0.58854	0.575245	k__Bacteria; p__Firmicutes; c__Clostridia; o__Clostridiales; f__Ruminococcaceae; g__Oscillospira; s__
New.CleanUp.ReferenceOTU33423	0.159901	0.623854	0.600376	k__Bacteria; p__Firmicutes; c__Clostridia; o__Clostridiales; f__Lachnospiraceae; g__; s__
New.CleanUp.ReferenceOTU42607	0.159901	0.627148	0.600376	Unassigned
New.CleanUp.ReferenceOTU58106	0.162835	0.584508	0.575245	k__Bacteria; p__Firmicutes; c__Clostridia; o__Clostridiales; f__; g__; s__
185743	0.166856	0.581423	0.574954	k__Bacteria; p__Firmicutes; c__Clostridia; o__Clostridiales; f__; g__; s__
New.ReferenceOTU10	0.166856	0.581423	0.574954	k__Bacteria; p__Firmicutes; c__Clostridia; o__Clostridiales; f__Ruminococcaceae; g__Oscillospira; s__
New.CleanUp.ReferenceOTU1201	0.166856	0.581423	0.574954	k__Bacteria; p__Firmicutes; c__Clostridia; o__Clostridiales; f__; g__; s__
New.CleanUp.ReferenceOTU40998	0.166856	0.581423	0.574954	k__Bacteria; p__Bacteroidetes; c__Bacteroidia; o__Bacteroidales; f__Porphyromonadaceae; g__Parabacteroides; s__
New.CleanUp.ReferenceOTU35016	0.167968	0.615342	0.596828	k__Bacteria; p__Firmicutes; c__Clostridia; o__Clostridiales; f__Ruminococcaceae; g__; s__
New.CleanUp.ReferenceOTU43910	0.167968	0.615342	0.596828	k__Bacteria; p__Firmicutes; c__Clostridia; o__Clostridiales; f__Ruminococcaceae; g__Oscillospira; s__
624911	0.171191	0.577177	0.573559	k__Bacteria; p__Proteobacteria; c__Gammaproteobacteria; o__Oceanospirillales; f__Halomonadaceae; g__Halomonas; s__
New.CleanUp.ReferenceOTU35256	0.171191	0.574968	0.573053	Unassigned
New.CleanUp.ReferenceOTU11945	0.175882	0.570521	0.571435	k__Bacteria; p__Firmicutes; c__Clostridia; o__Clostridiales; f__Ruminococcaceae; g__Oscillospira; s__
New.CleanUp.ReferenceOTU37703	0.178377	0.568827	0.570303	k__Bacteria; p__Firmicutes; c__Clostridia; o__Clostridiales; f__; g__; s__
New.CleanUp.ReferenceOTU75405	0.178377	0.568827	0.570303	k__Bacteria; p__Firmicutes; c__Clostridia; o__Clostridiales; f__; g__; s__
351309	0.179787	0.529599	0.54283	k__Bacteria; p__Firmicutes; c__Clostridia; o__Clostridiales; f__; g__; s__
193672	0.179787	0.529599	0.54283	k__Bacteria; p__Firmicutes; c__Clostridia; o__Clostridiales; f__Clostridiaceae; g__; s__
New.ReferenceOTU60	0.180981	0.561113	0.564808	k__Bacteria; p__Firmicutes; c__Clostridia; o__Clostridiales; f__; g__; s__
New.CleanUp.ReferenceOTU10723	0.180981	0.561113	0.564808	k__Bacteria; p__Firmicutes; c__Clostridia; o__Clostridiales; f__; g__; s__
New.CleanUp.ReferenceOTU68634	0.18392	0.526319	0.54283	k__Bacteria; p__Bacteroidetes; c__Bacteroidia; o__Bacteroidales; f__S24-7; g__; s__
269501	0.186551	0.559965	0.564808	k__Bacteria; p__Firmicutes; c__Clostridia; o__Clostridiales; f__; g__; s__
New.CleanUp.ReferenceOTU44218	0.186551	0.556214	0.56437	k__Bacteria; p__Firmicutes; c__Clostridia; o__Clostridiales; f__Peptostreptococcaceae; g__; s__
New.CleanUp.ReferenceOTU61432	0.186551	0.556214	0.56437	k__Bacteria; p__Firmicutes; c__Clostridia; o__Clostridiales; f__Ruminococcaceae; g__Oscillospira; s__
New.CleanUp.ReferenceOTU62270	0.186551	0.559965	0.564808	Unassigned
New.CleanUp.ReferenceOTU8939	0.188353	0.52297	0.542056	k__Bacteria; p__Firmicutes; c__Clostridia; o__Clostridiales; f__Ruminococcaceae; g__Ruminococcus; s__
New.CleanUp.ReferenceOTU30109	0.188353	0.521813	0.541967	k__Bacteria; p__Bacteroidetes; c__Bacteroidia; o__Bacteroidales; f__S24-7; g__; s__
New.CleanUp.ReferenceOTU69796	0.188353	0.521813	0.541967	k__Bacteria; p__Firmicutes; c__Clostridia; o__Clostridiales; f__; g__; s__
New.CleanUp.ReferenceOTU78341	0.188353	0.52297	0.542056	k__Bacteria; p__Bacteroidetes; c__Bacteroidia; o__Bacteroidales; f__Porphyromonadaceae; g__Parabacteroides; s__
267470	0.193122	0.517176	0.539923	k__Bacteria; p__Firmicutes; c__Clostridia; o__Clostridiales; f__; g__; s__
268121	0.193122	0.517176	0.539923	k__Bacteria; p__Firmicutes; c__Clostridia; o__Clostridiales; f__; g__; s__
New.CleanUp.ReferenceOTU15546	0.193122	0.518368	0.540052	k__Bacteria; p__Firmicutes; c__Clostridia; o__Clostridiales; f__Ruminococcaceae; g__Oscillospira; s__
New.CleanUp.ReferenceOTU26941	0.193122	0.518368	0.540052	k__Bacteria; p__Firmicutes; c__Clostridia; o__Clostridiales; f__Ruminococcaceae; g__Oscillospira; s__
259912	0.198273	0.51363	0.539002	k__Bacteria; p__Firmicutes; c__Clostridia; o__Clostridiales; f__Lachnospiraceae; g__; s__
New.CleanUp.ReferenceOTU15919	0.198273	0.511168	0.537533	k__Bacteria; p__Bacteroidetes; c__Bacteroidia; o__Bacteroidales; f__S24-7; g__; s__
New.CleanUp.ReferenceOTU56168	0.198273	0.51363	0.539002	k__Bacteria; p__Firmicutes; c__Clostridia; o__Clostridiales; f__; g__; s__
New.CleanUp.ReferenceOTU22109	0.203859	0.506215	0.53399	k__Bacteria; p__Firmicutes; c__Clostridia; o__Clostridiales; f__Ruminococcaceae; g__; s__
New.CleanUp.ReferenceOTU58343	0.203859	0.506215	0.53399	k__Bacteria; p__Verrucomicrobia; c__Verrucomicrobiae; o__Verrucomicrobiales; f__Verrucomicrobiaceae; g__Akkermansia; s__muciniphila
New.CleanUp.ReferenceOTU76046	0.203859	0.499698	0.53155	k__Bacteria; p__Firmicutes; c__Clostridia; o__Clostridiales; f__; g__; s__
189585	0.204545	0.470743	0.507689	k__Bacteria; p__Firmicutes; c__Clostridia; o__Clostridiales; f__; g__; s__
265793	0.204545	0.470743	0.507689	k__Bacteria; p__Firmicutes; c__Clostridia; o__Clostridiales; f__Ruminococcaceae; g__; s__
194151	0.204545	0.470743	0.507689	k__Bacteria; p__Firmicutes; c__Clostridia; o__Clostridiales; f__; g__; s__
New.CleanUp.ReferenceOTU18194	0.206835	0.497737	0.530783	k__Bacteria; p__Firmicutes; c__Clostridia; o__Clostridiales; f__; g__; s__
197890	0.209359	0.465951	0.507092	k__Bacteria; p__Firmicutes; c__Clostridia; o__Clostridiales; f__Ruminococcaceae; g__Oscillospira; s__
New.CleanUp.ReferenceOTU79380	0.209359	0.467181	0.507092	k__Bacteria; p__Bacteroidetes; c__Bacteroidia; o__Bacteroidales; f__Porphyromonadaceae; g__Parabacteroides; s__
182621	0.209946	0.501109	0.531933	k__Bacteria; p__Firmicutes; c__Clostridia; o__Clostridiales; f__Lachnospiraceae; g__Coprococcus; s__
New.CleanUp.ReferenceOTU32572	0.209946	0.495754	0.530141	k__Bacteria; p__Firmicutes; c__Clostridia; o__Clostridiales; f__; g__; s__
New.CleanUp.ReferenceOTU48001	0.211058	0.529619	0.54283	k__Bacteria; p__Firmicutes; c__Erysipelotrichi; o__Erysipelotrichales; f__Erysipelotrichaceae; g__; s__
270051	0.211897	0.464131	0.506498	k__Bacteria; p__Bacteroidetes; c__Bacteroidia; o__Bacteroidales; f__S24-7; g__; s__
New.CleanUp.ReferenceOTU21625	0.213201	0.492364	0.527074	k__Bacteria; p__Bacteroidetes; c__Bacteroidia; o__Bacteroidales; f__Porphyromonadaceae; g__Parabacteroides; s__
New.CleanUp.ReferenceOTU4976	0.214529	0.462293	0.506185	k__Bacteria; p__Firmicutes; c__Clostridia; o__Clostridiales; f__Ruminococcaceae; g__; s__
New.CleanUp.ReferenceOTU21763	0.216612	0.490317	0.525996	k__Bacteria; p__Firmicutes; c__Erysipelotrichi; o__Erysipelotrichales; f__Erysipelotrichaceae; g__; s__
New.CleanUp.ReferenceOTU23941	0.220102	0.454661	0.505433	Unassigned
New.CleanUp.ReferenceOTU59677	0.220102	0.457269	0.506185	k__Bacteria; p__Bacteroidetes; c__Bacteroidia; o__Bacteroidales; f__S24-7; g__; s__
New.CleanUp.ReferenceOTU28527	0.223957	0.481777	0.517383	k__Bacteria; p__Bacteroidetes; c__Bacteroidia; o__Bacteroidales; f__Porphyromonadaceae; g__Parabacteroides; s__
New.CleanUp.ReferenceOTU35951	0.223957	0.481777	0.517383	k__Bacteria; p__Bacteroidetes; c__Bacteroidia; o__Bacteroidales; f__S24-7; g__; s__
New.CleanUp.ReferenceOTU67507	0.223957	0.481777	0.517383	k__Bacteria; p__Firmicutes; c__Clostridia; o__Clostridiales; f__Ruminococcaceae; g__Oscillospira; s__
184451	0.224733	0.418962	0.479559	k__Bacteria; p__Firmicutes; c__Clostridia; o__Clostridiales; f__; g__; s__
295188	0.224733	0.418962	0.479559	k__Bacteria; p__Bacteroidetes; c__Bacteroidia; o__Bacteroidales; f__S24-7; g__; s__
259511	0.224733	0.418962	0.479559	k__Bacteria; p__Firmicutes; c__Clostridia; o__Clostridiales; f__; g__; s__
331013	0.224733	0.418962	0.479559	k__Bacteria; p__Firmicutes; c__Clostridia; o__Clostridiales; f__Ruminococcaceae; g__Ruminococcus; s__
259175	0.224733	0.418962	0.479559	k__Bacteria; p__Firmicutes; c__Clostridia; o__Clostridiales; f__; g__; s__
258165	0.224733	0.418962	0.479559	k__Bacteria; p__Firmicutes; c__Clostridia; o__Clostridiales; f__; g__; s__
New.ReferenceOTU50	0.226133	0.452104	0.504253	Unassigned
New.CleanUp.ReferenceOTU2985	0.226133	0.449422	0.502369	k__Bacteria; p__Firmicutes; c__Clostridia; o__Clostridiales; f__; g__; s__
New.CleanUp.ReferenceOTU75670	0.229341	0.440476	0.494007	k__Bacteria; p__Firmicutes; c__Bacilli; o__Turicibacterales; f__Turicibacteraceae; g__Turicibacter; s__
631764	0.2299	0.415259	0.479559	k__Bacteria; p__Actinobacteria; c__Coriobacteriia; o__Coriobacteriales; f__Coriobacteriaceae; g__Adlercreutzia; s__
258725	0.232689	0.438387	0.492756	k__Bacteria; p__Firmicutes; c__Clostridia; o__Clostridiales; f__Ruminococcaceae; g__Oscillospira; s__
271672	0.235441	0.410185	0.475861	k__Bacteria; p__Firmicutes; c__Clostridia; o__Clostridiales; f__Ruminococcaceae; g__Oscillospira; s__
4454025	0.236189	0.436275	0.492571	k__Bacteria; p__Firmicutes; c__Clostridia; o__Clostridiales; f__Lachnospiraceae; g__; s__
New.CleanUp.ReferenceOTU46605	0.238366	0.408259	0.475809	Unassigned
New.CleanUp.ReferenceOTU67378	0.239851	0.432669	0.489046	k__Bacteria; p__Firmicutes; c__Clostridia; o__Clostridiales; f__; g__; s__
New.CleanUp.ReferenceOTU47899	0.241402	0.406315	0.47409	k__Bacteria; p__Firmicutes; c__Clostridia; o__Clostridiales; f__; g__; s__
New.CleanUp.ReferenceOTU53948	0.243689	0.430493	0.488771	k__Bacteria; p__Bacteroidetes; c__Bacteroidia; o__Bacteroidales; f__S24-7; g__; s__
277208	0.244558	0.400278	0.4703	k__Bacteria; p__Firmicutes; c__Clostridia; o__Clostridiales; f__; g__; s__
276325	0.25	0.367276	0.44284	k__Bacteria; p__Firmicutes; c__Clostridia; o__Clostridiales; f__; g__; s__
263977	0.25	0.367276	0.44284	k__Bacteria; p__Firmicutes; c__Clostridia; o__Clostridiales; f__Ruminococcaceae; g__; s__
New.ReferenceOTU140	0.25	0.367276	0.44284	Unassigned
New.CleanUp.ReferenceOTU29529	0.25	0.367276	0.44284	k__Bacteria; p__Bacteroidetes; c__Bacteroidia; o__Bacteroidales; f__S24-7; g__; s__
New.CleanUp.ReferenceOTU46066	0.25	0.367276	0.44284	k__Bacteria; p__Bacteroidetes; c__Bacteroidia; o__Bacteroidales; f__S24-7; g__; s__
New.CleanUp.ReferenceOTU73051	0.25	0.367276	0.44284	k__Bacteria; p__Bacteroidetes; c__Bacteroidia; o__Bacteroidales; f__S24-7; g__; s__
New.CleanUp.ReferenceOTU19496	0.251952	0.421432	0.479559	k__Bacteria; p__Firmicutes; c__Clostridia; o__Clostridiales; f__Ruminococcaceae; g__Ruminococcus; s__
New.CleanUp.ReferenceOTU26191	0.251952	0.421432	0.479559	k__Bacteria; p__Bacteroidetes; c__Bacteroidia; o__Bacteroidales; f__Porphyromonadaceae; g__Parabacteroides; s__
New.CleanUp.ReferenceOTU36346	0.251952	0.421432	0.479559	k__Bacteria; p__Firmicutes; c__Clostridia; o__Clostridiales; f__; g__; s__
New.CleanUp.ReferenceOTU44373	0.251952	0.421432	0.479559	k__Bacteria; p__Bacteroidetes; c__Bacteroidia; o__Bacteroidales; f__S24-7; g__; s__
New.CleanUp.ReferenceOTU58923	0.254824	0.392734	0.46305	k__Bacteria; p__Bacteroidetes; c__Bacteroidia; o__Bacteroidales; f__S24-7; g__; s__
3903651	0.255883	0.362109	0.44284	k__Bacteria; p__Firmicutes; c__Clostridia; o__Clostridiales; f__Ruminococcaceae; g__Oscillospira; s__
198209	0.255883	0.363434	0.44284	k__Bacteria; p__Firmicutes; c__Clostridia; o__Clostridiales; f__Clostridiaceae; g__SMB53; s__
167420	0.255883	0.362109	0.44284	k__Bacteria; p__Firmicutes; c__Erysipelotrichi; o__Erysipelotrichales; f__Erysipelotrichaceae; g__; s__
165046	0.255883	0.362109	0.44284	k__Bacteria; p__Firmicutes; c__Clostridia; o__Clostridiales; f__Ruminococcaceae; g__Oscillospira; s__
343264	0.258544	0.383326	0.457154	k__Bacteria; p__Firmicutes; c__Clostridia; o__Clostridiales; f__; g__; s__
New.ReferenceOTU242	0.258544	0.383326	0.457154	k__Bacteria; p__Firmicutes; c__Clostridia; o__Clostridiales; f__Ruminococcaceae; g__; s__
688923	0.258985	0.360151	0.44284	k__Bacteria; p__Firmicutes; c__Clostridia; o__Clostridiales; f__Ruminococcaceae; g__; s__
2148365	0.262432	0.384118	0.457154	k__Bacteria; p__Firmicutes; c__Clostridia; o__Clostridiales; f__Lachnospiraceae; g__; s__
New.CleanUp.ReferenceOTU58771	0.262432	0.384118	0.457154	k__Bacteria; p__Bacteroidetes; c__Bacteroidia; o__Bacteroidales; f__Porphyromonadaceae; g__Parabacteroides; s__
New.CleanUp.ReferenceOTU40966	0.269014	0.352791	0.43683	k__Bacteria; p__Bacteroidetes; c__Bacteroidia; o__Bacteroidales; f__Porphyromonadaceae; g__Parabacteroides; s__
178959	0.26968	0.323236	0.412869	k__Bacteria; p__Firmicutes; c__Clostridia; o__Clostridiales; f__Ruminococcaceae; g__Oscillospira; s__
214919	0.26968	0.323236	0.412869	k__Bacteria; p__Firmicutes; c__Bacilli; o__Turicibacterales; f__Turicibacteraceae; g__Turicibacter; s__
New.CleanUp.ReferenceOTU150	0.27136	0.401965	0.471189	k__Bacteria; p__Bacteroidetes; c__Bacteroidia; o__Bacteroidales; f__S24-7; g__; s__
New.CleanUp.ReferenceOTU34167	0.272625	0.347936	0.433471	k__Bacteria; p__Firmicutes; c__Clostridia; o__Clostridiales
38415	0.27588	0.31939	0.410027	k__Bacteria; p__Firmicutes; c__Clostridia; o__Clostridiales; f__Lachnospiraceae; g__Dorea; s__
New.CleanUp.ReferenceOTU24086	0.279946	0.365766	0.44284	k__Bacteria; p__Firmicutes; c__Clostridia; o__Clostridiales; f__; g__; s__
2119418	0.282529	0.314135	0.405337	k__Bacteria; p__Proteobacteria; c__Gammaproteobacteria; o__Enterobacteriales; f__Enterobacteriaceae; g__Pantoea; s__agglomerans
New.CleanUp.ReferenceOTU29636	0.282529	0.314135	0.405337	k__Bacteria; p__Firmicutes; c__Clostridia; o__Clostridiales; f__Ruminococcaceae; g__; s__
New.CleanUp.ReferenceOTU11230	0.284398	0.33272	0.419683	k__Bacteria; p__Firmicutes; c__Clostridia; o__Clostridiales; f__Ruminococcaceae; g__Oscillospira; s__
New.CleanUp.ReferenceOTU3932	0.288675	0.33652	0.423947	Unassigned
365536	0.289683	0.305986	0.400379	k__Bacteria; p__Firmicutes; c__Clostridia; o__Clostridiales; f__Ruminococcaceae; g__Oscillospira; s__
261142	0.289683	0.308763	0.400964	k__Bacteria; p__Firmicutes; c__Clostridia; o__Clostridiales; f__; g__; s__
New.ReferenceOTU157	0.293151	0.326696	0.41415	k__Bacteria; p__Firmicutes; c__Clostridia; o__Clostridiales; f__Ruminococcaceae; g__; s__
New.CleanUp.ReferenceOTU81012	0.29347	0.30673	0.400379	k__Bacteria; p__Firmicutes; c__Clostridia; o__Clostridiales; f__Ruminococcaceae; g__Oscillospira; s__
New.CleanUp.ReferenceOTU65217	0.295455	0.279294	0.376719	k__Bacteria; p__Bacteroidetes; c__Bacteroidia; o__Bacteroidales; f__S24-7; g__; s__
363731	0.29887	0.277377	0.376719	k__Bacteria; p__Verrucomicrobia; c__Verrucomicrobiae; o__Verrucomicrobiales; f__Verrucomicrobiaceae; g__Akkermansia; s__muciniphila
New.CleanUp.ReferenceOTU55617	0.301511	0.345742	0.431404	k__Bacteria; p__Firmicutes; c__Clostridia; o__Clostridiales; f__; g__; s__
New.CleanUp.ReferenceOTU22089	0.305788	0.296209	0.390679	k__Bacteria; p__Bacteroidetes; c__Bacteroidia; o__Bacteroidales; f__S24-7; g__; s__
4331723	0.306073	0.272164	0.373578	k__Bacteria; p__Firmicutes; c__Clostridia; o__Clostridiales; f__Ruminococcaceae; g__Ruminococcus; s__
New.ReferenceOTU162	0.306073	0.272164	0.373578	k__Bacteria; p__Firmicutes; c__Clostridia; o__Clostridiales; f__; g__; s__
New.CleanUp.ReferenceOTU15580	0.307941	0.314933	0.40585	k__Bacteria; p__Bacteroidetes; c__Bacteroidia; o__Bacteroidales; f__S24-7; g__; s__
New.CleanUp.ReferenceOTU65760	0.309875	0.270194	0.371883	k__Bacteria; p__Firmicutes; c__Clostridia; o__Clostridiales; f__Dehalobacteriaceae; g__Dehalobacterium; s__
New.CleanUp.ReferenceOTU83929	0.309875	0.270194	0.371883	k__Bacteria; p__Bacteroidetes; c__Bacteroidia; o__Bacteroidales; f__Porphyromonadaceae; g__Parabacteroides; s__
197853	0.310253	0.286643	0.383563	k__Bacteria; p__Firmicutes; c__Clostridia; o__Clostridiales; f__; g__; s__
New.CleanUp.ReferenceOTU297	0.310253	0.286643	0.383563	Unassigned
New.CleanUp.ReferenceOTU14502	0.310253	0.286643	0.383563	k__Bacteria; p__Bacteroidetes; c__Bacteroidia; o__Bacteroidales; f__S24-7; g__; s__
New.CleanUp.ReferenceOTU44192	0.313823	0.264104	0.371074	k__Bacteria; p__Firmicutes; c__Clostridia; o__Clostridiales; f__; g__; s__
4342104	0.314627	0.243035	0.350226	k__Bacteria; p__Firmicutes; c__Clostridia; o__Clostridiales; f__Ruminococcaceae; g__Anaerotruncus; s__
New.ReferenceOTU207	0.314627	0.243035	0.350226	k__Bacteria; p__Bacteroidetes; c__Bacteroidia; o__Bacteroidales; f__S24-7; g__; s__
378273	0.314918	0.287446	0.384129	k__Bacteria; p__Firmicutes; c__Clostridia; o__Clostridiales; f__; g__; s__
New.CleanUp.ReferenceOTU4327	0.314918	0.290433	0.387099	k__Bacteria; p__Firmicutes; c__Clostridia; o__Clostridiales; f__Ruminococcaceae; g__Oscillospira; s__
New.CleanUp.ReferenceOTU47273	0.314918	0.284423	0.382109	k__Bacteria; p__Bacteroidetes; c__Bacteroidia; o__Bacteroidales; f__Porphyromonadaceae; g__Parabacteroides; s__
187400	0.317925	0.262075	0.368734	k__Bacteria; p__Firmicutes; c__Clostridia; o__Clostridiales; f__Ruminococcaceae; g__Ruminococcus; s__
265106	0.317925	0.264839	0.37159	k__Bacteria; p__Actinobacteria; c__Coriobacteriia; o__Coriobacteriales; f__Coriobacteriaceae; g__Adlercreutzia; s__
302503	0.317925	0.262075	0.368734	k__Bacteria; p__Firmicutes; c__Clostridia; o__Clostridiales; f__Ruminococcaceae; g__; s__
New.CleanUp.ReferenceOTU78974	0.317925	0.262075	0.368734	k__Bacteria; p__Bacteroidetes; c__Bacteroidia; o__Bacteroidales; f__Porphyromonadaceae; g__Parabacteroides; s__
269886	0.318182	0.241171	0.350033	k__Bacteria; p__Firmicutes; c__Clostridia; o__Clostridiales; f__; g__; s__
New.ReferenceOTU4	0.32186	0.239295	0.34781	k__Bacteria; p__Firmicutes; c__Clostridia; o__Clostridiales; f__; g__; s__
New.ReferenceOTU109	0.32186	0.239295	0.34781	k__Bacteria; p__Firmicutes; c__Clostridia; o__Clostridiales; f__Ruminococcaceae; g__; s__
New.CleanUp.ReferenceOTU14761	0.32186	0.239295	0.34781	k__Bacteria; p__Bacteroidetes; c__Bacteroidia; o__Bacteroidales; f__S24-7; g__; s__
New.CleanUp.ReferenceOTU65131	0.326637	0.256556	0.364007	k__Bacteria; p__Bacteroidetes; c__Bacteroidia; o__Bacteroidales; f__S24-7; g__; s__
New.CleanUp.ReferenceOTU82327	0.326637	0.256556	0.364007	k__Bacteria; p__Firmicutes; c__Clostridia; o__Clostridiales; f__Dehalobacteriaceae; g__Dehalobacterium; s__
New.CleanUp.ReferenceOTU5470	0.331271	0.25447	0.362572	k__Bacteria; p__Bacteroidetes; c__Bacteroidia; o__Bacteroidales; f__S24-7; g__; s__
New.CleanUp.ReferenceOTU5543	0.331662	0.294802	0.390679	k__Bacteria; p__Bacteroidetes; c__Bacteroidia; o__Bacteroidales; f__Porphyromonadaceae; g__Parabacteroides; s__
New.CleanUp.ReferenceOTU78944	0.331662	0.294802	0.390679	k__Bacteria; p__Bacteroidetes; c__Bacteroidia; o__Bacteroidales; f__S24-7; g__; s__
New.CleanUp.ReferenceOTU83540	0.336107	0.245081	0.351174	k__Bacteria; p__Bacteroidetes; c__Bacteroidia; o__Bacteroidales; f__S24-7; g__; s__
265912	0.340909	0.206868	0.316599	k__Bacteria; p__Firmicutes; c__Clostridia; o__Clostridiales; f__; g__; s__
263899	0.340909	0.206868	0.316599	k__Bacteria; p__Firmicutes; c__Clostridia; o__Clostridiales; f__; g__; s__
New.ReferenceOTU9	0.340909	0.206868	0.316599	k__Bacteria; p__Bacteroidetes; c__Bacteroidia; o__Bacteroidales; f__S24-7; g__; s__
New.ReferenceOTU84	0.341162	0.242908	0.350226	Unassigned
New.CleanUp.ReferenceOTU85077	0.341162	0.248796	0.35549	Unassigned
181249	0.342381	0.227068	0.339301	k__Bacteria; p__Firmicutes; c__Clostridia; o__Clostridiales; f__; g__; s__
New.ReferenceOTU99	0.34485	0.205059	0.316599	k__Bacteria; p__Firmicutes; c__Clostridia; o__Clostridiales; f__; g__; s__
New.ReferenceOTU189	0.34485	0.205059	0.316599	k__Bacteria; p__Firmicutes; c__Clostridia; o__Clostridiales; f__; g__; s__
4463108	0.346451	0.239216	0.34781	k__Bacteria; p__Firmicutes; c__Bacilli; o__Lactobacillales; f__Lactobacillaceae; g__Lactobacillus; s__ruminis
New.ReferenceOTU166	0.346451	0.239216	0.34781	k__Bacteria; p__Firmicutes; c__Clostridia; o__Clostridiales; f__Lachnospiraceae; g__Coprococcus; s__
185723	0.348932	0.203239	0.316309	k__Bacteria; p__Bacteroidetes; c__Bacteroidia; o__Bacteroidales; f__S24-7; g__; s__
New.CleanUp.ReferenceOTU47076	0.351763	0.220398	0.331784	k__Bacteria; p__Firmicutes; c__Clostridia; o__Clostridiales; f__Ruminococcaceae; g__; s__
New.ReferenceOTU16	0.356753	0.217008	0.327167	k__Bacteria; p__Firmicutes; c__Clostridia; o__Clostridiales; f__Ruminococcaceae; g__; s__
New.ReferenceOTU276	0.356753	0.217008	0.327167	k__Bacteria; p__Firmicutes; c__Clostridia; o__Clostridiales; f__Ruminococcaceae; g__; s__
177195	0.359573	0.177967	0.28577	k__Bacteria; p__Firmicutes; c__Clostridia; o__Clostridiales; f__; g__; s__
268492	0.359573	0.177967	0.28577	k__Bacteria; p__Firmicutes; c__Clostridia; o__Clostridiales; f__; g__; s__
1885089	0.361961	0.207942	0.317004	k__Bacteria; p__Firmicutes; c__Clostridia; o__Clostridiales; f__Ruminococcaceae; g__; s__
New.CleanUp.ReferenceOTU18072	0.361961	0.207942	0.317004	k__Bacteria; p__Firmicutes; c__Clostridia; o__Clostridiales; f__; g__; s__
4045882	0.362103	0.195179	0.308511	k__Bacteria; p__Firmicutes; c__Clostridia; o__Clostridiales; f__Lachnospiraceae; g__; s__
195189	0.363636	0.176253	0.28577	k__Bacteria; p__Firmicutes; c__Clostridia; o__Clostridiales; f__Lachnospiraceae; g__Coprococcus; s__
New.CleanUp.ReferenceOTU15513	0.36393	0.227852	0.33997	k__Bacteria; p__Firmicutes; c__Clostridia; o__Clostridiales; f__; g__; s__
New.CleanUp.ReferenceOTU73827	0.36784	0.174531	0.28577	k__Bacteria; p__Firmicutes; c__Clostridia; o__Clostridiales; f__Ruminococcaceae; g__; s__
New.CleanUp.ReferenceOTU80542	0.36784	0.174531	0.28577	k__Bacteria; p__Firmicutes; c__Clostridia; o__Clostridiales; f__Ruminococcaceae; g__Oscillospira; s__
New.CleanUp.ReferenceOTU51944	0.371761	0.188833	0.301304	k__Bacteria; p__Firmicutes; c__Clostridia; o__Clostridiales; f__Ruminococcaceae; g__; s__
New.CleanUp.ReferenceOTU35320	0.373101	0.2023	0.315818	k__Bacteria; p__Firmicutes; c__Clostridia; o__Clostridiales; f__Ruminococcaceae; g__; s__
353073	0.376705	0.169872	0.283574	k__Bacteria; p__Bacteroidetes; c__Bacteroidia; o__Bacteroidales; f__S24-7; g__; s__
New.ReferenceOTU155	0.376705	0.169872	0.283574	k__Bacteria; p__Verrucomicrobia; c__Verrucomicrobiae; o__Verrucomicrobiales; f__Verrucomicrobiaceae; g__Akkermansia; s__muciniphila
191811	0.381385	0.16812	0.283574	k__Bacteria; p__Firmicutes; c__Clostridia; o__Clostridiales; f__; g__; s__
181348	0.382235	0.177038	0.28577	k__Bacteria; p__Firmicutes; c__Clostridia; o__Clostridiales; f__Lachnospiraceae; g__Coprococcus; s__
258099	0.382235	0.177038	0.28577	k__Bacteria; p__Firmicutes; c__Clostridia; o__Clostridiales; f__Ruminococcaceae; g__; s__
New.CleanUp.ReferenceOTU12112	0.382235	0.177038	0.28577	k__Bacteria; p__Firmicutes; c__Clostridia; o__Clostridiales; f__Lachnospiraceae; g__; s__
New.CleanUp.ReferenceOTU57827	0.386244	0.165156	0.280327	k__Bacteria; p__Firmicutes; c__Clostridia; o__Clostridiales; f__Ruminococcaceae; g__Ruminococcus; s__
183545	0.386364	0.14915	0.261057	k__Bacteria; p__Firmicutes; c__Clostridia; o__Clostridiales; f__Ruminococcaceae; g__Oscillospira; s__
628218	0.386364	0.14915	0.261057	k__Bacteria; p__Firmicutes; c__Clostridia; o__Clostridiales; f__; g__; s__
New.ReferenceOTU21	0.386364	0.14915	0.261057	k__Bacteria; p__Bacteroidetes; c__Bacteroidia; o__Bacteroidales; f__S24-7; g__; s__
668514	0.387816	0.175064	0.28577	k__Bacteria; p__Proteobacteria; c__Gammaproteobacteria; o__Enterobacteriales; f__Enterobacteriaceae; g__; s__
New.CleanUp.ReferenceOTU51051	0.391965	0.20869	0.317004	k__Bacteria; p__Bacteroidetes; c__Bacteroidia; o__Bacteroidales; f__S24-7; g__; s__
New.CleanUp.ReferenceOTU5409	0.393648	0.17308	0.28577	k__Bacteria; p__Firmicutes; c__Clostridia; o__Clostridiales; f__; g__; s__
New.CleanUp.ReferenceOTU35925	0.393648	0.17308	0.28577	k__Bacteria; p__Bacteroidetes; c__Bacteroidia; o__Bacteroidales; f__S24-7; g__; s__
New.CleanUp.ReferenceOTU13966	0.396545	0.15916	0.273409	k__Bacteria; p__Bacteroidetes; c__Bacteroidia; o__Bacteroidales; f__S24-7; g__; s__
New.CleanUp.ReferenceOTU24804	0.396545	0.161602	0.276148	k__Bacteria; p__Firmicutes; c__Clostridia; o__Clostridiales; f__Ruminococcaceae; g__; s__
New.ReferenceOTU85	0.399751	0.173803	0.28577	k__Bacteria; p__Bacteroidetes; c__Bacteroidia; o__Bacteroidales; f__Porphyromonadaceae; g__Parabacteroides; s__
3709990	0.400249	0.14316	0.260944	k__Bacteria; p__Firmicutes; c__Erysipelotrichi; o__Erysipelotrichales; f__Erysipelotrichaceae; g__Eubacterium; s__dolichum
New.ReferenceOTU5	0.400249	0.14316	0.260944	k__Bacteria; p__Bacteroidetes; c__Bacteroidia; o__Bacteroidales; f__S24-7; g__; s__
New.CleanUp.ReferenceOTU48698	0.400249	0.14316	0.260944	k__Bacteria; p__Firmicutes; c__Clostridia; o__Clostridiales; f__; g__; s__
New.CleanUp.ReferenceOTU11354	0.402015	0.156129	0.270451	k__Bacteria; p__Bacteroidetes; c__Bacteroidia; o__Bacteroidales; f__Porphyromonadaceae; g__Parabacteroides; s__
New.CleanUp.ReferenceOTU68883	0.402015	0.156129	0.270451	k__Bacteria; p__Bacteroidetes; c__Bacteroidia; o__Bacteroidales; f__Porphyromonadaceae; g__Parabacteroides; s__
263687	0.40452	0.126849	0.24396	k__Bacteria; p__Firmicutes; c__Clostridia; o__Clostridiales; f__Lachnospiraceae; g__; s__
1902400	0.40452	0.126849	0.24396	k__Bacteria; p__Firmicutes; c__Clostridia; o__Clostridiales; f__Lachnospiraceae; g__; s__
New.CleanUp.ReferenceOTU51239	0.405222	0.14152	0.259827	Unassigned
268596	0.407718	0.154316	0.268229	k__Bacteria; p__Firmicutes; c__Clostridia; o__Clostridiales; f__Ruminococcaceae; g__Oscillospira; s__
191067	0.409091	0.12535	0.243858	k__Bacteria; p__Firmicutes; c__Clostridia; o__Clostridiales; f__; g__; s__
157840	0.410384	0.13649	0.255696	k__Bacteria; p__Firmicutes; c__Clostridia; o__Clostridiales; f__; g__; s__
New.CleanUp.ReferenceOTU50247	0.41367	0.146231	0.261057	k__Bacteria; p__Bacteroidetes; c__Bacteroidia; o__Bacteroidales; f__S24-7; g__; s__
New.CleanUp.ReferenceOTU63782	0.41367	0.146231	0.261057	k__Bacteria; p__Firmicutes; c__Clostridia; o__Clostridiales; f__Lachnospiraceae; g__; s__
New.CleanUp.ReferenceOTU23921	0.415749	0.137093	0.255879	k__Bacteria; p__Bacteroidetes; c__Bacteroidia; o__Bacteroidales; f__S24-7; g__; s__
New.CleanUp.ReferenceOTU69421	0.419919	0.159459	0.273409	k__Bacteria; p__Verrucomicrobia; c__Verrucomicrobiae; o__Verrucomicrobiales; f__Verrucomicrobiaceae; g__Akkermansia; s__muciniphila
New.CleanUp.ReferenceOTU83209	0.419919	0.159459	0.273409	k__Bacteria; p__Bacteroidetes; c__Bacteroidia; o__Bacteroidales; f__S24-7; g__; s__
261799	0.423793	0.120828	0.238963	k__Bacteria; p__Firmicutes; c__Clostridia; o__Clostridiales; f__Ruminococcaceae; g__; s__
New.CleanUp.ReferenceOTU79815	0.426401	0.141241	0.259827	Unassigned
New.CleanUp.ReferenceOTU79461	0.427352	0.148838	0.261057	k__Bacteria; p__Verrucomicrobia; c__Verrucomicrobiae; o__Verrucomicrobiales; f__Verrucomicrobiaceae; g__Akkermansia; s__muciniphila
New.CleanUp.ReferenceOTU21198	0.429058	0.118279	0.238559	k__Bacteria; p__Firmicutes; c__Bacilli; o__Turicibacterales; f__Turicibacteraceae; g__Turicibacter; s__
4460604	0.431818	0.10462	0.222343	k__Bacteria; p__Firmicutes; c__Clostridia; o__Clostridiales; f__; g__; s__
4343981	0.431818	0.10462	0.222343	k__Bacteria; p__Tenericutes; c__Mollicutes; o__RF39; f__; g__; s__
1136443	0.431818	0.10462	0.222343	k__Bacteria; p__Deferribacteres; c__Deferribacteres; o__Deferribacterales; f__Deferribacteraceae; g__Mucispirillum; s__schaedleri
264684	0.431818	0.10462	0.222343	k__Bacteria; p__Firmicutes; c__Clostridia; o__Clostridiales; f__; g__; s__
4364747	0.4332	0.122885	0.240449	k__Bacteria; p__Firmicutes; c__Clostridia; o__Clostridiales; f__Clostridiaceae; g__; s__
586453	0.4332	0.122885	0.240449	k__Bacteria; p__Firmicutes; c__Clostridia; o__Clostridiales; f__Christensenellaceae; g__; s__
179657	0.4332	0.122885	0.240449	k__Bacteria; p__Firmicutes; c__Clostridia; o__Clostridiales; f__Lachnospiraceae; g__; s__
356226	0.4332	0.128658	0.246502	k__Bacteria; p__Bacteroidetes; c__Bacteroidia; o__Bacteroidales; f__S24-7; g__; s__
290607	0.4332	0.122885	0.240449	k__Bacteria; p__Firmicutes; c__Clostridia; o__Clostridiales; f__Lachnospiraceae; g__; s__
311975	0.4332	0.128658	0.246502	k__Bacteria; p__Firmicutes; c__Clostridia; o__Clostridiales; f__; g__; s__
New.CleanUp.ReferenceOTU19365	0.434524	0.113638	0.233181	k__Bacteria; p__Firmicutes; c__Clostridia; o__Clostridiales; f__; g__; s__
335965	0.440204	0.112107	0.232874	k__Bacteria; p__Firmicutes; c__Clostridia; o__Clostridiales; f__Lachnospiraceae; g__; s__
267536	0.44198	0.101858	0.220645	k__Bacteria; p__Firmicutes; c__Clostridia; o__Clostridiales; f__Mogibacteriaceae; g__; s__
175922	0.44198	0.100915	0.219071	k__Bacteria; p__Firmicutes; c__Clostridia; o__Clostridiales; f__Ruminococcaceae; g__Oscillospira; s__
New.CleanUp.ReferenceOTU79809	0.44198	0.100915	0.219071	k__Bacteria; p__Firmicutes; c__Clostridia; o__Clostridiales; f__Ruminococcaceae; g__Oscillospira; s__
New.CleanUp.ReferenceOTU58499	0.446113	0.110573	0.230161	k__Bacteria; p__Firmicutes; c__Clostridia; o__Clostridiales; f__Peptostreptococcaceae; g__; s__
New.CleanUp.ReferenceOTU69720	0.446134	0.119471	0.238559	k__Bacteria; p__Bacteroidetes; c__Bacteroidia; o__Bacteroidales; f__S24-7; g__; s__
New.ReferenceOTU91	0.447338	0.0995297	0.219071	k__Bacteria; p__Firmicutes; c__Clostridia; o__Clostridiales; f__; g__; s__
New.CleanUp.ReferenceOTU664	0.447914	0.131711	0.24905	k__Bacteria; p__Bacteroidetes; c__Bacteroidia; o__Bacteroidales; f__S24-7; g__; s__
273967	0.449467	0.0879614	0.20598	k__Bacteria; p__Firmicutes; c__Clostridia; o__Clostridiales; f__Lachnospiraceae; g__; s__
259293	0.449467	0.0879614	0.20598	k__Bacteria; p__Bacteroidetes; c__Bacteroidia; o__Bacteroidales; f__S24-7; g__; s__
186886	0.449467	0.0879614	0.20598	k__Bacteria; p__Firmicutes; c__Clostridia; o__Clostridiales; f__Ruminococcaceae; g__; s__
New.CleanUp.ReferenceOTU9741	0.452267	0.109037	0.22743	k__Bacteria; p__Bacteroidetes; c__Bacteroidia; o__Bacteroidales; f__S24-7; g__; s__
New.CleanUp.ReferenceOTU3999	0.452267	0.142457	0.260944	k__Bacteria; p__Bacteroidetes; c__Bacteroidia; o__Bacteroidales; f__Porphyromonadaceae; g__Parabacteroides; s__
191616	0.458664	0.093912	0.212255	k__Bacteria; p__Firmicutes; c__Clostridia; o__Clostridiales; f__Ruminococcaceae; g__; s__
264101	0.458664	0.093912	0.212255	k__Bacteria; p__Firmicutes; c__Clostridia; o__Clostridiales; f__Ruminococcaceae; g__Oscillospira; s__
New.CleanUp.ReferenceOTU10913	0.458664	0.0967553	0.217028	k__Bacteria; p__Bacteroidetes; c__Bacteroidia; o__Bacteroidales; f__Porphyromonadaceae; g__Parabacteroides; s__
New.CleanUp.ReferenceOTU28107	0.460301	0.114865	0.234747	k__Bacteria; p__Bacteroidetes; c__Bacteroidia; o__Bacteroidales; f__Porphyromonadaceae; g__Parabacteroides; s__
New.CleanUp.ReferenceOTU72743	0.460301	0.114865	0.234747	k__Bacteria; p__Firmicutes; c__Clostridia; o__Clostridiales; f__Ruminococcaceae; g__Oscillospira; s__
New.CleanUp.ReferenceOTU1334	0.46466	0.0925201	0.212234	k__Bacteria; p__Firmicutes; c__Clostridia; o__Clostridiales; f__; g__; s__
828435	0.465242	0.0833499	0.205154	k__Bacteria; p__Firmicutes; c__Erysipelotrichi; o__Erysipelotrichales; f__Erysipelotrichaceae; g__; s__
269037	0.465379	0.0996189	0.219071	k__Bacteria; p__Firmicutes; c__Clostridia; o__Clostridiales; f__; g__; s__
136783	0.465379	0.0996189	0.219071	k__Bacteria; p__Firmicutes; c__Clostridia; o__Clostridiales; f__; g__; s__
191098	0.465379	0.0996189	0.219071	k__Bacteria; p__Firmicutes; c__Clostridia; o__Clostridiales; f__Lachnospiraceae; g__; s__
181174	0.465379	0.0996189	0.219071	k__Bacteria; p__Firmicutes; c__Clostridia; o__Clostridiales; f__Ruminococcaceae; g__; s__
91557	0.475909	0.107861	0.225444	k__Bacteria; p__Proteobacteria; c__Gammaproteobacteria; o__Enterobacteriales; f__Enterobacteriaceae; g__; s__
New.CleanUp.ReferenceOTU27665	0.475909	0.107861	0.225444	k__Bacteria; p__Bacteroidetes; c__Bacteroidia; o__Bacteroidales; f__Porphyromonadaceae; g__Parabacteroides; s__
New.CleanUp.ReferenceOTU50465	0.475909	0.107861	0.225444	k__Bacteria; p__Firmicutes; c__Clostridia; o__Clostridiales; f__Ruminococcaceae; g__Oscillospira; s__
New.CleanUp.ReferenceOTU80945	0.475909	0.107861	0.225444	k__Bacteria; p__Firmicutes; c__Clostridia; o__Clostridiales; f__Ruminococcaceae; g__Anaerotruncus; s__
New.CleanUp.ReferenceOTU82072	0.475909	0.107861	0.225444	k__Bacteria; p__Bacteroidetes; c__Bacteroidia; o__Bacteroidales; f__S24-7; g__; s__
324985	0.476731	0.0808445	0.203411	k__Bacteria; p__Firmicutes; c__Clostridia; o__Clostridiales; f__Lachnospiraceae; g__Coprococcus; s__
New.ReferenceOTU70	0.477273	0.0713605	0.185578	Unassigned
New.CleanUp.ReferenceOTU80553	0.477273	0.0713605	0.185578	k__Bacteria; p__Bacteroidetes; c__Bacteroidia; o__Bacteroidales; f__Porphyromonadaceae; g__Parabacteroides; s__
182712	0.48279	0.0702361	0.185578	k__Bacteria; p__Firmicutes; c__Clostridia; o__Clostridiales; f__; g__; s__
New.CleanUp.ReferenceOTU17506	0.48279	0.0702361	0.185578	k__Bacteria; p__Bacteroidetes; c__Bacteroidia; o__Bacteroidales; f__S24-7; g__; s__
1024529	0.482805	0.0770316	0.196784	k__Bacteria; p__Firmicutes; c__Clostridia; o__Clostridiales; f__Clostridiaceae; g__; s__
New.ReferenceOTU171	0.484165	0.08263	0.204377	k__Bacteria; p__Firmicutes; c__Clostridia; o__Clostridiales; f__Clostridiaceae; g__Clostridium
New.CleanUp.ReferenceOTU14646	0.484165	0.08263	0.204377	k__Bacteria; p__Firmicutes; c__Clostridia; o__Clostridiales; f__; g__; s__
New.CleanUp.ReferenceOTU28061	0.487377	0.0938871	0.212255	k__Bacteria; p__Firmicutes; c__Clostridia; o__Clostridiales; f__Ruminococcaceae; g__Oscillospira; s__
New.CleanUp.ReferenceOTU77720	0.488504	0.0683478	0.184872	k__Bacteria; p__Bacteroidetes; c__Bacteroidia; o__Bacteroidales; f__S24-7; g__; s__
158625	0.489116	0.0757809	0.195739	k__Bacteria; p__Firmicutes; c__Clostridia; o__Clostridiales; f__Ruminococcaceae; g__; s__
2797565	0.489116	0.0757809	0.195739	k__Bacteria; p__Firmicutes; c__Clostridia; o__Clostridiales; f__Mogibacteriaceae; g__; s__
1105328	0.494413	0.0593144	0.170987	k__Bacteria; p__Firmicutes; c__Clostridia; o__Clostridiales; f__Lachnospiraceae; g__Coprococcus; s__
183174	0.494413	0.0593144	0.170987	k__Bacteria; p__Firmicutes; c__Clostridia; o__Clostridiales; f__Lachnospiraceae; g__Ruminococcus; s__gnavus
New.ReferenceOTU218	0.494426	0.0672271	0.184304	k__Bacteria; p__Firmicutes; c__Clostridia; o__Clostridiales; f__; g__; s__
New.CleanUp.ReferenceOTU7945	0.495682	0.0762355	0.195739	k__Bacteria; p__Firmicutes; c__Clostridia; o__Clostridiales; f__Ruminococcaceae; g__Ruminococcus; s__
New.CleanUp.ReferenceOTU64769	0.498621	0.0817418	0.203674	k__Bacteria; p__Bacteroidetes; c__Bacteroidia; o__Bacteroidales; f__Porphyromonadaceae; g__Parabacteroides; s__
New.CleanUp.ReferenceOTU74400	0.498621	0.0817418	0.203674	k__Bacteria; p__Bacteroidetes; c__Bacteroidia; o__Bacteroidales; f__Porphyromonadaceae; g__Parabacteroides; s__
New.CleanUp.ReferenceOTU74988	0.498621	0.0798388	0.202422	k__Bacteria; p__Verrucomicrobia; c__Verrucomicrobiae; o__Verrucomicrobiales; f__Verrucomicrobiaceae; g__Akkermansia; s__muciniphila
276509	0.5	0.0583133	0.170987	k__Bacteria; p__Bacteroidetes; c__Bacteroidia; o__Bacteroidales; f__S24-7; g__; s__
New.CleanUp.ReferenceOTU26117	0.500568	0.0661079	0.181728	k__Bacteria; p__Bacteroidetes; c__Bacteroidia; o__Bacteroidales; f__S24-7; g__; s__
187222	0.506352	0.0774928	0.196968	k__Bacteria; p__Firmicutes; c__Clostridia; o__Clostridiales; f__; g__; s__
New.CleanUp.ReferenceOTU29876	0.509647	0.0711837	0.185578	k__Bacteria; p__Firmicutes; c__Clostridia; o__Clostridiales; f__Ruminococcaceae; g__; s__
New.CleanUp.ReferenceOTU59521	0.511766	0.0563182	0.170987	k__Bacteria; p__Firmicutes; c__Clostridia; o__Clostridiales; f__; g__; s__
New.CleanUp.ReferenceOTU56285	0.513572	0.0615995	0.174065	k__Bacteria; p__Firmicutes; c__Clostridia; o__Clostridiales; f__Lachnospiraceae; g__; s__
New.CleanUp.ReferenceOTU68593	0.513572	0.0615995	0.174065	k__Bacteria; p__Firmicutes; c__Clostridia; o__Clostridiales; f__Clostridiaceae; g__; s__
New.CleanUp.ReferenceOTU41708	0.514454	0.0760989	0.195739	k__Bacteria; p__Firmicutes; c__Clostridia; o__Clostridiales; f__Ruminococcaceae; g__; s__
New.CleanUp.ReferenceOTU57835	0.517088	0.0657046	0.181112	k__Bacteria; p__Firmicutes; c__Clostridia; o__Clostridiales; f__Clostridiaceae; g__; s__
New.CleanUp.ReferenceOTU77185	0.517088	0.0657046	0.181112	Unassigned
New.CleanUp.ReferenceOTU83811	0.517088	0.0657046	0.181112	k__Bacteria; p__Bacteroidetes; c__Bacteroidia; o__Bacteroidales; f__S24-7; g__; s__
290647	0.51797	0.0546485	0.167526	k__Bacteria; p__Firmicutes; c__Clostridia; o__Clostridiales; f__Clostridiaceae; g__; s__
174960	0.51797	0.0546485	0.167526	k__Bacteria; p__Firmicutes; c__Clostridia; o__Clostridiales; f__Clostridiaceae; g__; s__
173722	0.51797	0.0546485	0.167526	k__Bacteria; p__Firmicutes; c__Clostridia; o__Clostridiales; f__Lachnospiraceae; g__Ruminococcus; s__gnavus
356455	0.520466	0.0604905	0.173845	k__Bacteria; p__Firmicutes; c__Clostridia; o__Clostridiales; f__; g__; s__
637934	0.522727	0.0473123	0.154893	k__Bacteria; p__Firmicutes; c__Clostridia; o__Clostridiales; f__; g__; s__
New.ReferenceOTU248	0.522727	0.0473123	0.154893	k__Bacteria; p__Bacteroidetes; c__Bacteroidia; o__Bacteroidales; f__S24-7; g__; s__
304779	0.531085	0.0506659	0.160171	k__Bacteria; p__Firmicutes; c__Clostridia; o__Clostridiales; f__Clostridiaceae; g__Clostridium; s__perfringens
New.ReferenceOTU240	0.531085	0.0506659	0.160171	k__Bacteria; p__Bacteroidetes; c__Bacteroidia; o__Bacteroidales; f__S24-7; g__; s__
New.CleanUp.ReferenceOTU8154	0.533002	0.0623918	0.175324	k__Bacteria; p__Bacteroidetes; c__Bacteroidia; o__Bacteroidales; f__S24-7; g__; s__
New.CleanUp.ReferenceOTU74409	0.533002	0.0623918	0.175324	k__Bacteria; p__Bacteroidetes; c__Bacteroidia; o__Bacteroidales; f__S24-7; g__; s__
2883968	0.535028	0.0449655	0.153158	k__Bacteria; p__Firmicutes; c__Clostridia; o__Clostridiales; f__; g__; s__
230421	0.53513	0.0537963	0.166937	k__Bacteria; p__Firmicutes; c__Clostridia; o__Clostridiales; f__Ruminococcaceae; g__; s__
New.ReferenceOTU173	0.53513	0.0537963	0.166937	k__Bacteria; p__Firmicutes; c__Clostridia; o__Clostridiales; f__Clostridiaceae; g__; s__
New.CleanUp.ReferenceOTU65845	0.53513	0.0537963	0.166937	k__Bacteria; p__Firmicutes; c__Clostridia; o__Clostridiales; f__Clostridiaceae; g__; s__
New.CleanUp.ReferenceOTU64139	0.538028	0.0496897	0.158959	k__Bacteria; p__Firmicutes; c__Clostridia; o__Clostridiales; f__; g__; s__
New.ReferenceOTU123	0.53936	0.0388794	0.140653	k__Bacteria; p__Bacteroidetes; c__Bacteroidia; o__Bacteroidales; f__S24-7; g__; s__
New.ReferenceOTU246	0.53936	0.0388794	0.140653	k__Bacteria; p__Bacteroidetes; c__Bacteroidia; o__Bacteroidales; f__S24-7; g__; s__
New.ReferenceOTU216	0.53936	0.0388794	0.140653	k__Bacteria; p__Bacteroidetes; c__Bacteroidia; o__Bacteroidales; f__Porphyromonadaceae; g__Parabacteroides; s__
New.CleanUp.ReferenceOTU15699	0.541514	0.0446887	0.15273	k__Bacteria; p__Bacteroidetes; c__Bacteroidia; o__Bacteroidales; f__Porphyromonadaceae; g__Parabacteroides; s__
4383953	0.545455	0.0381116	0.140653	k__Bacteria; p__Firmicutes; c__Clostridia; o__Clostridiales; f__Clostridiaceae; g__; s__
New.CleanUp.ReferenceOTU5116	0.551107	0.051625	0.161687	k__Bacteria; p__Firmicutes; c__Clostridia; o__Clostridiales; f__; g__; s__
New.CleanUp.ReferenceOTU9708	0.551107	0.051625	0.161687	k__Bacteria; p__Firmicutes; c__Clostridia; o__Clostridiales; f__Dehalobacteriaceae; g__Dehalobacterium; s__
New.CleanUp.ReferenceOTU72878	0.551107	0.051625	0.161687	k__Bacteria; p__Firmicutes; c__Clostridia; o__Clostridiales; f__Ruminococcaceae; g__; s__
271866	0.551761	0.0373477	0.140653	k__Bacteria; p__Firmicutes; c__Clostridia; o__Clostridiales; f__; g__; s__
New.CleanUp.ReferenceOTU73445	0.551761	0.0373477	0.140653	k__Bacteria; p__Bacteroidetes; c__Bacteroidia; o__Bacteroidales; f__Porphyromonadaceae; g__Parabacteroides; s__
197600	0.555225	0.0406227	0.144192	k__Bacteria; p__Firmicutes; c__Clostridia; o__Clostridiales; f__Lachnospiraceae; g__; s__
1678333	0.558291	0.0365878	0.140653	k__Bacteria; p__Firmicutes; c__Clostridia; o__Clostridiales; f__Lachnospiraceae; g__Coprococcus; s__
174260	0.565058	0.0353196	0.140653	k__Bacteria; p__Firmicutes; c__Clostridia; o__Clostridiales; f__; g__; s__
New.CleanUp.ReferenceOTU57498	0.565058	0.0353196	0.140653	k__Bacteria; p__Firmicutes; c__Clostridia; o__Clostridiales; f__; g__; s__
New.CleanUp.ReferenceOTU81727	0.565058	0.0353196	0.140653	k__Bacteria; p__Firmicutes; c__Clostridia; o__Clostridiales; f__Ruminococcaceae; g__; s__
288109	0.565825	0.0560342	0.170987	k__Bacteria; p__Firmicutes; c__Clostridia; o__Clostridiales; f__Dehalobacteriaceae; g__Dehalobacterium; s__
185222	0.568182	0.0304788	0.137035	k__Bacteria; p__Firmicutes; c__Clostridia; o__Clostridiales; f__Clostridiaceae; g__; s__
4446320	0.568796	0.0419351	0.146284	k__Bacteria; p__Firmicutes; c__Clostridia; o__Clostridiales; f__Clostridiaceae; g__; s__
4393532	0.568796	0.0419351	0.146284	k__Bacteria; p__Actinobacteria; c__Coriobacteriia; o__Coriobacteriales; f__Coriobacteriaceae; g__Eggerthella; s__lenta
New.CleanUp.ReferenceOTU43973	0.568796	0.0419351	0.146284	k__Bacteria; p__Firmicutes; c__Clostridia; o__Clostridiales; f__; g__; s__
New.CleanUp.ReferenceOTU31651	0.570034	0.0389304	0.140653	k__Bacteria; p__Bacteroidetes; c__Bacteroidia; o__Bacteroidales; f__Porphyromonadaceae; g__Parabacteroides; s__
1579962	0.572078	0.0345712	0.140653	k__Bacteria; p__Firmicutes; c__Clostridia; o__Clostridiales; f__Ruminococcaceae; g__; s__
New.CleanUp.ReferenceOTU35195	0.572872	0.059327	0.170987	k__Bacteria; p__Bacteroidetes; c__Bacteroidia; o__Bacteroidales; f__S24-7; g__; s__
344108	0.581553	0.0287244	0.13535	k__Bacteria; p__Firmicutes; c__Clostridia; o__Clostridiales; f__Lachnospiraceae; g__; s__
New.ReferenceOTU120	0.581553	0.0291673	0.13535	k__Bacteria; p__Bacteroidetes; c__Bacteroidia; o__Bacteroidales; f__S24-7; g__; s__
New.CleanUp.ReferenceOTU45229	0.581553	0.0291673	0.13535	k__Bacteria; p__Firmicutes; c__Clostridia; o__Clostridiales; f__Ruminococcaceae; g__; s__
4439469	0.584307	0.0247638	0.132419	k__Bacteria; p__Firmicutes; c__Clostridia; o__Clostridiales; f__Ruminococcaceae; g__; s__
3919797	0.584307	0.0247638	0.132419	k__Bacteria; p__Firmicutes; c__Clostridia; o__Clostridiales; f__; g__; s__
203713	0.584307	0.0247638	0.132419	k__Bacteria; p__Bacteroidetes; c__Bacteroidia; o__Bacteroidales; f__S24-7; g__; s__
New.ReferenceOTU182	0.584307	0.0247638	0.132419	k__Bacteria; p__Bacteroidetes; c__Bacteroidia; o__Bacteroidales; f__Porphyromonadaceae; g__Parabacteroides; s__
New.ReferenceOTU51	0.584307	0.0247638	0.132419	k__Bacteria; p__Bacteroidetes; c__Bacteroidia; o__Bacteroidales; f__S24-7; g__; s__
New.ReferenceOTU266	0.584307	0.0247638	0.132419	k__Bacteria; p__Bacteroidetes; c__Bacteroidia; o__Bacteroidales; f__S24-7; g__; s__
New.CleanUp.ReferenceOTU12276	0.584307	0.0247638	0.132419	k__Bacteria; p__Bacteroidetes; c__Bacteroidia; o__Bacteroidales; f__S24-7; g__; s__
New.CleanUp.ReferenceOTU13267	0.584307	0.0247638	0.132419	k__Bacteria; p__Bacteroidetes; c__Bacteroidia; o__Bacteroidales; f__Porphyromonadaceae; g__Parabacteroides; s__
196391	0.586094	0.0338949	0.139385	k__Bacteria; p__Firmicutes; c__Clostridia; o__Clostridiales; f__Clostridiaceae; g__02d06; s__
683621	0.586094	0.0338949	0.139385	k__Bacteria; p__Firmicutes; c__Clostridia; o__Clostridiales; f__Clostridiaceae; g__; s__
New.CleanUp.ReferenceOTU6734	0.586094	0.0338949	0.139385	k__Bacteria; p__Firmicutes; c__Clostridia; o__Clostridiales; f__Clostridiaceae; g__; s__
New.CleanUp.ReferenceOTU21787	0.586094	0.0338949	0.139385	k__Bacteria; p__Firmicutes; c__Clostridia; o__Clostridiales; f__Clostridiaceae; g__; s__
196753	0.586302	0.0394311	0.141451	k__Bacteria; p__Firmicutes; c__Clostridia; o__Clostridiales; f__Clostridiaceae; g__; s__
New.CleanUp.ReferenceOTU10446	0.586302	0.0394311	0.141451	k__Bacteria; p__Firmicutes; c__Clostridia; o__Clostridiales; f__; g__; s__
New.CleanUp.ReferenceOTU30330	0.586939	0.0315914	0.13895	k__Bacteria; p__Bacteroidetes; c__Bacteroidia; o__Bacteroidales; f__S24-7; g__; s__
New.CleanUp.ReferenceOTU40433	0.586939	0.0315914	0.13895	k__Bacteria; p__Bacteroidetes; c__Bacteroidia; o__Bacteroidales; f__S24-7; g__; s__
New.CleanUp.ReferenceOTU18254	0.587887	0.0444471	0.152419	Unassigned
New.CleanUp.ReferenceOTU34798	0.594651	0.0330868	0.139385	k__Bacteria; p__Bacteroidetes; c__Bacteroidia; o__Bacteroidales; f__S24-7; g__; s__
2901246	0.603506	0.025517	0.132419	k__Bacteria; p__Firmicutes; c__Clostridia; o__Clostridiales; f__; g__; s__
235424	0.603593	0.0322844	0.139385	k__Bacteria; p__Firmicutes; c__Clostridia; o__Clostridiales; f__Clostridiaceae; g__Clostridium; s__
New.CleanUp.ReferenceOTU39579	0.603593	0.0333799	0.139385	k__Bacteria; p__Firmicutes; c__Clostridia; o__Clostridiales; f__; g__; s__
4041792	0.611395	0.0248967	0.132419	k__Bacteria; p__Firmicutes; c__Clostridia; o__Clostridiales; f__Clostridiaceae; g__; s__
New.CleanUp.ReferenceOTU82140	0.612146	0.0221555	0.132419	k__Bacteria; p__Verrucomicrobia; c__Verrucomicrobiae; o__Verrucomicrobiales; f__Verrucomicrobiaceae; g__Akkermansia; s__muciniphila
268733	0.613636	0.0190716	0.132419	k__Bacteria; p__Firmicutes; c__Clostridia; o__Clostridiales; f__Clostridiaceae; g__; s__
621700	0.620505	0.0258876	0.132419	k__Bacteria; p__Firmicutes; c__Clostridia; o__Clostridiales; f__; g__; s__
296420	0.620505	0.0258876	0.132419	k__Bacteria; p__Firmicutes; c__Clostridia; o__Clostridiales; f__Clostridiaceae; g__Clostridium; s__
New.ReferenceOTU25	0.620505	0.0258876	0.132419	k__Bacteria; p__Firmicutes; c__Clostridia; o__Clostridiales; f__Ruminococcaceae; g__; s__
New.CleanUp.ReferenceOTU4406	0.620505	0.0258876	0.132419	k__Bacteria; p__Firmicutes; c__Clostridia; o__Clostridiales; f__Clostridiaceae
New.CleanUp.ReferenceOTU26772	0.620505	0.0258876	0.132419	k__Bacteria; p__Firmicutes; c__Clostridia; o__Clostridiales; f__; g__; s__
324013	0.629253	0.0153222	0.126864	k__Bacteria; p__Bacteroidetes; c__Bacteroidia; o__Bacteroidales; f__S24-7; g__; s__
New.ReferenceOTU281	0.629253	0.0153222	0.126864	k__Bacteria; p__Bacteroidetes; c__Bacteroidia; o__Bacteroidales; f__Porphyromonadaceae; g__Parabacteroides; s__
187000	0.633174	0.0361451	0.140653	k__Bacteria; p__Firmicutes; c__Clostridia; o__Clostridiales; f__Ruminococcaceae; g__; s__
182470	0.63569	0.0173503	0.132419	k__Bacteria; p__Firmicutes; c__Clostridia; o__Clostridiales; f__; g__; s__
262104	0.635851	0.0194672	0.132419	k__Bacteria; p__Firmicutes; c__Clostridia; o__Clostridiales; f__Lachnospiraceae; g__; s__
New.CleanUp.ReferenceOTU8657	0.635851	0.0194672	0.132419	k__Bacteria; p__Firmicutes; c__Clostridia; o__Clostridiales; f__; g__; s__
New.CleanUp.ReferenceOTU55082	0.635851	0.0194672	0.132419	k__Bacteria; p__Bacteroidetes; c__Bacteroidia; o__Bacteroidales; f__S24-7; g__; s__
566391	0.637059	0.0206585	0.132419	k__Bacteria; p__Firmicutes; c__Clostridia; o__Clostridiales; f__; g__; s__
New.CleanUp.ReferenceOTU24954	0.637059	0.0226599	0.132419	k__Bacteria; p__Firmicutes; c__Clostridia; o__Clostridiales; f__; g__; s__
New.CleanUp.ReferenceOTU45768	0.637059	0.0206585	0.132419	k__Bacteria; p__Firmicutes; c__Clostridia; o__Clostridiales; f__; g__; s__
New.CleanUp.ReferenceOTU49175	0.637059	0.0206585	0.132419	k__Bacteria; p__Bacteroidetes; c__Bacteroidia; o__Bacteroidales; f__Porphyromonadaceae; g__Parabacteroides; s__
New.CleanUp.ReferenceOTU59287	0.637059	0.0206585	0.132419	k__Bacteria; p__Firmicutes; c__Clostridia; o__Clostridiales; f__; g__; s__
New.CleanUp.ReferenceOTU74959	0.637059	0.0206585	0.132419	k__Bacteria; p__Firmicutes; c__Clostridia; o__Clostridiales; f__; g__; s__
New.ReferenceOTU22	0.643721	0.0145246	0.126864	Unassigned
New.CleanUp.ReferenceOTU69434	0.643876	0.0270473	0.133446	k__Bacteria; p__Bacteroidetes; c__Bacteroidia; o__Bacteroidales; f__S24-7; g__; s__
New.CleanUp.ReferenceOTU79292	0.643876	0.0270473	0.133446	k__Bacteria; p__Firmicutes; c__Clostridia; o__Clostridiales; f__; g__; s__
175416	0.651786	0.0155373	0.126864	k__Bacteria; p__Firmicutes; c__Clostridia; o__Clostridiales; f__; g__; s__
265940	0.651786	0.0155373	0.126864	k__Bacteria; p__Firmicutes; c__Clostridia; o__Clostridiales; f__Ruminococcaceae; g__Ruminococcus; s__
231169	0.65608	0.0195174	0.132419	k__Bacteria; p__Firmicutes; c__Clostridia; o__Clostridiales; f__Lachnospiraceae; g__; s__
1109539	0.659234	0.0134846	0.126864	k__Bacteria; p__Firmicutes; c__Clostridia; o__Clostridiales; f__Lachnospiraceae; g__; s__
New.CleanUp.ReferenceOTU62558	0.659234	0.0137458	0.126864	k__Bacteria; p__Bacteroidetes; c__Bacteroidia; o__Bacteroidales; f__S24-7; g__; s__
New.CleanUp.ReferenceOTU55423	0.666711	0.0112596	0.126864	k__Bacteria; p__Firmicutes; c__Clostridia; o__Clostridiales; f__; g__; s__
322367	0.672214	0.0154513	0.126864	k__Bacteria; p__Firmicutes; c__Clostridia; o__Clostridiales; f__Clostridiaceae; g__; s__
316378	0.672214	0.0154513	0.126864	k__Bacteria; p__Firmicutes; c__Clostridia; o__Clostridiales; f__Clostridiaceae; g__; s__
New.ReferenceOTU221	0.672214	0.0154513	0.126864	k__Bacteria; p__Firmicutes; c__Clostridia; o__Clostridiales; f__; g__; s__
New.ReferenceOTU119	0.672214	0.0154513	0.126864	k__Bacteria; p__Firmicutes; c__Clostridia; o__Clostridiales; f__; g__; s__
New.CleanUp.ReferenceOTU25488	0.672214	0.0154513	0.126864	k__Bacteria; p__Firmicutes; c__Clostridia; o__Clostridiales; f__Clostridiaceae; g__; s__
New.CleanUp.ReferenceOTU75368	0.672214	0.0154513	0.126864	k__Bacteria; p__Firmicutes; c__Clostridia; o__Clostridiales; f__; g__; s__
134762	0.6742	0.00920689	0.126864	k__Bacteria; p__Bacteroidetes; c__Bacteroidia; o__Bacteroidales; f__S24-7; g__; s__
New.ReferenceOTU196	0.674601	0.0109355	0.126864	k__Bacteria; p__Bacteroidetes; c__Bacteroidia; o__Bacteroidales; f__S24-7; g__; s__
New.CleanUp.ReferenceOTU62476	0.676913	0.0180279	0.132419	k__Bacteria; p__Firmicutes; c__Clostridia; o__Clostridiales; f__Ruminococcaceae; g__; s__
300662	0.688024	0.0121756	0.126864	k__Bacteria; p__Firmicutes; c__Clostridia; o__Clostridiales; f__Clostridiaceae; g__Sarcina; s__
153291	0.688024	0.0121756	0.126864	k__Bacteria; p__Firmicutes; c__Clostridia; o__Clostridiales; f__; g__; s__
New.ReferenceOTU63	0.688024	0.0121756	0.126864	k__Bacteria; p__Firmicutes; c__Clostridia; o__Clostridiales; f__Clostridiaceae; g__; s__
New.ReferenceOTU152	0.688024	0.0121756	0.126864	k__Bacteria; p__Firmicutes; c__Clostridia; o__Clostridiales; f__; g__; s__
New.CleanUp.ReferenceOTU11108	0.688024	0.0121756	0.126864	k__Bacteria; p__Firmicutes; c__Clostridia; o__Clostridiales; f__Clostridiaceae; g__Clostridium; s__
New.CleanUp.ReferenceOTU31678	0.688024	0.0135473	0.126864	k__Bacteria; p__Bacteroidetes; c__Bacteroidia; o__Bacteroidales; f__S24-7; g__; s__
New.CleanUp.ReferenceOTU34490	0.688024	0.0121756	0.126864	k__Bacteria; p__Firmicutes; c__Clostridia; o__Clostridiales; f__Clostridiaceae; g__; s__
New.CleanUp.ReferenceOTU47083	0.688024	0.0121756	0.126864	k__Bacteria; p__Firmicutes; c__Clostridia; o__Clostridiales; f__; g__; s__
New.CleanUp.ReferenceOTU51972	0.688024	0.0121756	0.126864	k__Bacteria; p__Firmicutes; c__Clostridia; o__Clostridiales; f__; g__; s__
New.ReferenceOTU197	0.692902	0.0142075	0.126864	k__Bacteria; p__Deferribacteres; c__Deferribacteres; o__Deferribacterales; f__Deferribacteraceae; g__Mucispirillum; s__schaedleri
New.CleanUp.ReferenceOTU39002	0.692902	0.0142075	0.126864	k__Bacteria; p__Firmicutes; c__Clostridia; o__Clostridiales; f__; g__; s__
New.CleanUp.ReferenceOTU83408	0.699866	0.0158731	0.126864	k__Bacteria; p__Bacteroidetes; c__Bacteroidia; o__Bacteroidales; f__Porphyromonadaceae; g__Parabacteroides; s__
New.CleanUp.ReferenceOTU51323	0.700067	0.00916779	0.126864	k__Bacteria; p__Firmicutes; c__Clostridia; o__Clostridiales; f__; g__; s__
193620	0.704545	0.00683522	0.126864	k__Bacteria; p__Firmicutes; c__Clostridia; o__Clostridiales; f__; g__; s__
New.CleanUp.ReferenceOTU24080	0.718738	0.00858676	0.126864	k__Bacteria; p__Firmicutes; c__Clostridia; o__Clostridiales; f__Ruminococcaceae; g__; s__
183446	0.719146	0.00537121	0.126864	k__Bacteria; p__Bacteroidetes; c__Bacteroidia; o__Bacteroidales; f__S24-7; g__; s__
New.ReferenceOTU151	0.719146	0.00537121	0.126864	k__Bacteria; p__Bacteroidetes; c__Bacteroidia; o__Bacteroidales; f__S24-7; g__; s__
182861	0.723923	0.00891352	0.126864	k__Bacteria; p__Firmicutes; c__Clostridia; o__; f__; g__; s__
New.ReferenceOTU112	0.723923	0.00891352	0.126864	k__Bacteria; p__Firmicutes; c__Clostridia; o__Clostridiales; f__Clostridiaceae; g__; s__
172859	0.729867	0.00604689	0.126864	k__Bacteria; p__Firmicutes; c__Clostridia; o__Clostridiales; f__; g__; s__
New.CleanUp.ReferenceOTU33762	0.735681	0.00501454	0.126864	k__Bacteria; p__Bacteroidetes; c__Bacteroidia; o__Bacteroidales; f__S24-7; g__; s__
New.CleanUp.ReferenceOTU9246	0.738988	0.00783789	0.126864	Unassigned
609589	0.748347	0.00524068	0.126864	k__Bacteria; p__Firmicutes; c__Clostridia; o__Clostridiales; f__; g__; s__
182643	0.748347	0.00524068	0.126864	k__Bacteria; p__Firmicutes; c__Clostridia; o__Clostridiales; f__Clostridiaceae; g__; s__
New.ReferenceOTU104	0.748347	0.00524068	0.126864	k__Bacteria; p__Firmicutes; c__Clostridia; o__Clostridiales; f__; g__; s__
335267	0.75	0.00391316	0.126864	k__Bacteria; p__Firmicutes; c__Clostridia; o__Clostridiales; f__; g__; s__
New.CleanUp.ReferenceOTU13156	0.761053	0.00643504	0.126864	k__Bacteria; p__Firmicutes; c__Clostridia; o__Clostridiales; f__Clostridiaceae; g__; s__
274095	0.76277	0.0043937	0.126864	k__Bacteria; p__Firmicutes; c__Clostridia; o__Clostridiales; f__Lachnospiraceae; g__Ruminococcus; s__gnavus
206324	0.764093	0.00304174	0.126864	k__Bacteria; p__Bacteroidetes; c__Bacteroidia; o__Bacteroidales; f__S24-7; g__; s__
233817	0.764093	0.00304174	0.126864	k__Bacteria; p__Firmicutes; c__Clostridia; o__Clostridiales; f__; g__; s__
New.ReferenceOTU258	0.764093	0.00304174	0.126864	k__Bacteria; p__Bacteroidetes; c__Bacteroidia; o__Bacteroidales; f__S24-7; g__; s__
New.ReferenceOTU83	0.775632	0.00496829	0.126864	k__Bacteria; p__Firmicutes; c__Clostridia; o__Clostridiales; f__Clostridiaceae; g__; s__
New.CleanUp.ReferenceOTU10408	0.775632	0.00496829	0.126864	k__Bacteria; p__Firmicutes; c__Clostridia; o__Clostridiales; f__Clostridiaceae
New.CleanUp.ReferenceOTU12369	0.781661	0.00281608	0.126864	k__Bacteria; p__Bacteroidetes; c__Bacteroidia; o__Bacteroidales; f__Porphyromonadaceae; g__Parabacteroides; s__
New.CleanUp.ReferenceOTU79116	0.782586	0.00376499	0.126864	k__Bacteria; p__Firmicutes; c__Clostridia; o__Clostridiales; f__; g__; s__
273954	0.799503	0.00445104	0.126864	k__Bacteria; p__Firmicutes; c__Clostridia; o__Clostridiales; f__; g__; s__
New.ReferenceOTU177	0.800499	0.00252986	0.126864	k__Bacteria; p__Bacteroidetes; c__Bacteroidia; o__Bacteroidales; f__S24-7; g__; s__
New.CleanUp.ReferenceOTU59659	0.839372	0.00311351	0.126864	k__Bacteria; p__Bacteroidetes; c__Bacteroidia; o__Bacteroidales; f__Porphyromonadaceae; g__Parabacteroides; s__

## Sheet: MCP-1 levels
Mouse_ID	Age (months)	Age_group	serum MCP-19 (pg/mL)
41	26	Aged	153.4
42	26	Aged	46.1
43	26	Aged	75.4
44	26	Aged	10.6
45	26	Aged	28.6
51	2	Young	12.5
52	2	Young	17.1
53	2	Young	0
54	2	Young	0
55	2	Young	6.3
